# Supplementary material for: The Transcriptomic and Phenotypic Response of the Melanized Yeast Exophiala dermatitidis to Ionizing Particle Exposure
Source: Front Microbiol. 2021 Jan 12;11:609996. doi: 10.3389/fmicb.2020.609996 (PMC7835796; doi:10.3389/fmicb.2020.609996)
Supplement: Supplementary Table 9 — STRING output of highly confident connections between genes that were upregulated within each particle dataset, including genes making up specific nodes, confidence values for those nodes, and annotations for each gene. [file Table_9.xlsx]

## Sheet: Alpha String Nodes
#node1	node2	node1_string_internal_id	node2_string_internal_id	node1_external_id	node2_external_id	neighborhood_on_chromosome	gene_fusion	phylogenetic_cooccurrence	homology	coexpression	experimentally_determined_interaction	database_annotated	automated_textmining	combined_score
XP_009157275.1	XP_009153338.1	2644669	2640873	5970.XP_009157275.1	5970.XP_009153338.1	0	0	0	0	0.235	0.692	0.986	0.904	0.999
XP_009160986.1	XP_009158928.1	2648271	2646267	5970.XP_009160986.1	5970.XP_009158928.1	0.233	0	0	0	0.904	0.908	0.986	0.897	0.999
XP_009161490.1	XP_009160986.1	2648759	2648271	5970.XP_009161490.1	5970.XP_009160986.1	0	0	0	0	0.729	0	0.986	0.808	0.999
XP_009161518.1	XP_009157410.1	2648787	2644801	5970.XP_009161518.1	5970.XP_009157410.1	0	0	0.401	0.717	0.963	0.987	0.924	0.903	0.999
XP_009159646.1	XP_009155049.1	2646972	2642546	5970.XP_009159646.1	5970.XP_009155049.1	0	0	0	0	0.216	0.691	0.986	0.908	0.999
XP_009157780.1	XP_009154296.1	2645151	2641806	5970.XP_009157780.1	5970.XP_009154296.1	0.161	0	0.314	0	0.169	0.286	0.986	0.894	0.999
XP_009161490.1	XP_009154887.1	2648759	2642385	5970.XP_009161490.1	5970.XP_009154887.1	0	0	0	0	0.662	0.9	0.986	0.906	0.999
XP_009161285.1	XP_009158281.1	2648558	2645634	5970.XP_009161285.1	5970.XP_009158281.1	0	0	0.455	0.734	0.963	0.97	0.781	0.901	0.999
XP_009161285.1	XP_009152662.1	2648558	2640206	5970.XP_009161285.1	5970.XP_009152662.1	0	0	0.464	0.731	0.963	0.908	0.781	0.901	0.999
XP_009158696.1	XP_009153283.1	2646037	2640819	5970.XP_009158696.1	5970.XP_009153283.1	0	0	0	0	0.611	0.908	0.986	0.907	0.999
XP_009158757.1	XP_009155049.1	2646098	2642546	5970.XP_009158757.1	5970.XP_009155049.1	0	0	0	0	0.184	0.689	0.986	0.908	0.999
XP_009158484.1	XP_009157798.1	2645831	2645168	5970.XP_009158484.1	5970.XP_009157798.1	0.077	0	0	0	0.649	0	0.986	0.855	0.999
XP_009161518.1	XP_009153464.1	2648787	2640994	5970.XP_009161518.1	5970.XP_009153464.1	0	0	0	0	0.626	0.692	0.986	0.809	0.999
XP_009161285.1	XP_009154187.1	2648558	2641700	5970.XP_009161285.1	5970.XP_009154187.1	0	0	0	0	0.763	0.915	0.986	0.898	0.999
XP_009159812.1	XP_009155218.1	2647133	2642712	5970.XP_009159812.1	5970.XP_009155218.1	0	0	0	0	0.155	0.908	0.986	0.895	0.999
XP_009161490.1	XP_009153589.1	2648759	2641118	5970.XP_009161490.1	5970.XP_009153589.1	0	0	0	0	0.853	0	0.986	0.827	0.999
XP_009161490.1	XP_009160480.1	2648759	2647784	5970.XP_009161490.1	5970.XP_009160480.1	0	0	0	0	0.85	0.31	0.986	0.823	0.999
XP_009158884.1	XP_009157798.1	2646223	2645168	5970.XP_009158884.1	5970.XP_009157798.1	0.043	0.603	0.408	0	0.715	0	0.986	0.904	0.999
XP_009156843.1	XP_009153958.1	2644254	2641478	5970.XP_009156843.1	5970.XP_009153958.1	0	0	0	0	0.901	0.903	0.781	0.772	0.999
XP_009160986.1	XP_009153589.1	2648271	2641118	5970.XP_009160986.1	5970.XP_009153589.1	0	0	0	0	0.85	0.908	0.986	0.885	0.999
XP_009161490.1	XP_009152340.1	2648759	2639892	5970.XP_009161490.1	5970.XP_009152340.1	0	0	0	0	0.659	0	0.986	0.833	0.999
XP_009158281.1	XP_009153464.1	2645634	2640994	5970.XP_009158281.1	5970.XP_009153464.1	0	0	0	0	0.473	0.903	0.986	0.808	0.999
XP_009153636.1	XP_009153296.1	2641163	2640832	5970.XP_009153636.1	5970.XP_009153296.1	0	0	0	0	0.221	0.692	0.986	0.824	0.999
XP_009161518.1	XP_009159779.1	2648787	2647100	5970.XP_009161518.1	5970.XP_009159779.1	0.052	0	0	0	0.702	0.982	0.986	0.817	0.999
XP_009161518.1	XP_009152662.1	2648787	2640206	5970.XP_009161518.1	5970.XP_009152662.1	0	0	0.369	0.772	0.963	0.98	0.781	0.898	0.999
XP_009160480.1	XP_009158928.1	2647784	2646267	5970.XP_009160480.1	5970.XP_009158928.1	0	0	0	0	0.852	0.908	0.986	0.856	0.999
XP_009153589.1	XP_009152340.1	2641118	2639892	5970.XP_009153589.1	5970.XP_009152340.1	0	0	0	0	0.878	0.149	0.986	0.814	0.999
XP_009159742.1	XP_009156884.1	2647063	2644295	5970.XP_009159742.1	5970.XP_009156884.1	0.233	0	0	0	0.557	0.908	0.986	0.905	0.999
XP_009160630.1	XP_009158669.1	2647930	2646010	5970.XP_009160630.1	5970.XP_009158669.1	0	0	0	0.563	0.198	0.908	0.986	0.889	0.999
XP_009153636.1	XP_009152340.1	2641163	2639892	5970.XP_009153636.1	5970.XP_009152340.1	0	0	0	0	0.198	0.692	0.986	0.859	0.999
XP_009160480.1	XP_009154887.1	2647784	2642385	5970.XP_009160480.1	5970.XP_009154887.1	0	0	0	0	0.913	0.689	0.986	0.898	0.999
XP_009161518.1	XP_009154668.1	2648787	2642169	5970.XP_009161518.1	5970.XP_009154668.1	0	0	0.379	0.8	0.963	0.97	0.781	0.903	0.999
XP_009153328.1	XP_009152574.1	2640863	2640120	5970.XP_009153328.1	5970.XP_009152574.1	0	0	0	0.543	0.949	0.908	0.833	0.84	0.999
XP_009155515.1	XP_009154537.1	2643000	2642043	5970.XP_009155515.1	5970.XP_009154537.1	0	0	0	0	0.135	0.796	0.986	0.905	0.999
XP_009154668.1	XP_009154187.1	2642169	2641700	5970.XP_009154668.1	5970.XP_009154187.1	0	0	0	0	0.894	0.982	0.986	0.892	0.999
XP_009158281.1	XP_009152662.1	2645634	2640206	5970.XP_009158281.1	5970.XP_009152662.1	0	0	0.435	0.763	0.963	0.98	0.781	0.81	0.999
XP_009160553.1	XP_009152327.1	2647854	2639879	5970.XP_009160553.1	5970.XP_009152327.1	0	0	0	0	0.172	0.69	0.986	0.902	0.999
XP_009160043.1	XP_009152574.1	2647358	2640120	5970.XP_009160043.1	5970.XP_009152574.1	0	0	0	0	0.853	0.905	0.781	0.809	0.999
XP_009160986.1	XP_009154887.1	2648271	2642385	5970.XP_009160986.1	5970.XP_009154887.1	0	0	0	0	0.689	0.333	0.986	0.809	0.999
XP_009158928.1	XP_009153296.1	2646267	2640832	5970.XP_009158928.1	5970.XP_009153296.1	0	0	0	0	0.689	0.352	0.986	0.725	0.999
XP_009155823.1	XP_009153958.1	2643292	2641478	5970.XP_009155823.1	5970.XP_009153958.1	0	0	0	0	0.791	0.907	0.781	0.859	0.999
XP_009154187.1	XP_009152662.1	2641700	2640206	5970.XP_009154187.1	5970.XP_009152662.1	0	0	0	0	0.724	0.915	0.986	0.887	0.999
XP_009157485.1	XP_009157295.1	2644868	2644688	5970.XP_009157485.1	5970.XP_009157295.1	0	0	0	0	0.171	0.908	0.986	0.882	0.999
XP_009160986.1	XP_009153296.1	2648271	2640832	5970.XP_009160986.1	5970.XP_009153296.1	0	0	0	0	0.648	0.333	0.986	0.783	0.999
XP_009160395.1	XP_009155049.1	2647700	2642546	5970.XP_009160395.1	5970.XP_009155049.1	0	0	0	0	0.093	0.805	0.986	0.908	0.999
XP_009161466.1	XP_009154720.1	2648735	2642220	5970.XP_009161466.1	5970.XP_009154720.1	0.196	0	0	0	0.939	0.819	0.781	0.609	0.999
XP_009161490.1	XP_009158928.1	2648759	2646267	5970.XP_009161490.1	5970.XP_009158928.1	0	0	0	0	0.793	0	0.986	0.692	0.999
XP_009154887.1	XP_009153589.1	2642385	2641118	5970.XP_009154887.1	5970.XP_009153589.1	0	0	0	0	0.663	0.372	0.986	0.809	0.999
XP_009158928.1	XP_009153589.1	2646267	2641118	5970.XP_009158928.1	5970.XP_009153589.1	0	0	0	0	0.868	0.907	0.986	0.888	0.999
XP_009153315.1	XP_009152628.1	2640851	2640173	5970.XP_009153315.1	5970.XP_009152628.1	0	0	0	0	0.256	0.982	0.781	0.837	0.999
XP_009157410.1	XP_009154668.1	2644801	2642169	5970.XP_009157410.1	5970.XP_009154668.1	0	0	0.458	0.742	0.963	0.962	0.781	0.904	0.999
XP_009161466.1	XP_009160063.1	2648735	2647377	5970.XP_009161466.1	5970.XP_009160063.1	0	0	0	0	0.048	0.998	0.986	0.31	0.999
XP_009161490.1	XP_009153296.1	2648759	2640832	5970.XP_009161490.1	5970.XP_009153296.1	0	0	0	0	0.645	0.31	0.986	0.794	0.999
XP_009153464.1	XP_009152662.1	2640994	2640206	5970.XP_009153464.1	5970.XP_009152662.1	0	0	0	0	0.579	0.839	0.986	0.768	0.999
XP_009159779.1	XP_009154668.1	2647100	2642169	5970.XP_009159779.1	5970.XP_009154668.1	0.052	0	0	0	0.752	0.864	0.986	0.789	0.999
XP_009156183.1	XP_009153125.1	2643637	2640663	5970.XP_009156183.1	5970.XP_009153125.1	0	0	0.479	0	0.897	0.688	0.986	0.898	0.999
XP_009158281.1	XP_009157410.1	2645634	2644801	5970.XP_009158281.1	5970.XP_009157410.1	0	0	0.457	0.7	0.963	0.978	0.924	0.895	0.999
XP_009157067.1	XP_009152327.1	2644472	2639879	5970.XP_009157067.1	5970.XP_009152327.1	0	0	0	0	0.109	0.69	0.986	0.818	0.999
XP_009157528.1	XP_009156701.1	2644907	2644119	5970.XP_009157528.1	5970.XP_009156701.1	0	0	0	0	0.441	0.908	0.899	0.908	0.999
XP_009153589.1	XP_009153296.1	2641118	2640832	5970.XP_009153589.1	5970.XP_009153296.1	0	0	0	0	0.735	0.372	0.986	0.808	0.999
XP_009160986.1	XP_009160480.1	2648271	2647784	5970.XP_009160986.1	5970.XP_009160480.1	0	0	0	0	0.875	0.908	0.986	0.84	0.999
XP_009157410.1	XP_009153464.1	2644801	2640994	5970.XP_009157410.1	5970.XP_009153464.1	0	0	0	0	0.248	0.692	0.986	0.78	0.999
XP_009159779.1	XP_009158281.1	2647100	2645634	5970.XP_009159779.1	5970.XP_009158281.1	0.052	0	0	0	0.731	0.883	0.986	0.848	0.999
XP_009158281.1	XP_009154187.1	2645634	2641700	5970.XP_009158281.1	5970.XP_009154187.1	0	0	0	0	0.71	0.982	0.986	0.905	0.999
XP_009154720.1	XP_009154628.1	2642220	2642132	5970.XP_009154720.1	5970.XP_009154628.1	0	0	0.465	0.819	0.849	0.908	0.924	0.895	0.999
XP_009155930.1	XP_009155049.1	2643393	2642546	5970.XP_009155930.1	5970.XP_009155049.1	0	0	0	0	0.131	0.991	0.986	0.908	0.999
XP_009153296.1	XP_009152340.1	2640832	2639892	5970.XP_009153296.1	5970.XP_009152340.1	0	0	0	0	0.666	0.901	0.986	0.906	0.999
XP_009155922.1	XP_009155640.1	2643385	2643119	5970.XP_009155922.1	5970.XP_009155640.1	0.046	0	0	0	0.145	0.998	0.781	0.747	0.999
XP_009159779.1	XP_009153464.1	2647100	2640994	5970.XP_009159779.1	5970.XP_009153464.1	0	0	0	0	0.553	0.998	0.986	0.809	0.999
XP_009157410.1	XP_009154187.1	2644801	2641700	5970.XP_009157410.1	5970.XP_009154187.1	0	0	0	0	0.723	0.982	0.986	0.896	0.999
XP_009154887.1	XP_009153296.1	2642385	2640832	5970.XP_009154887.1	5970.XP_009153296.1	0	0	0	0	0.85	0.504	0.986	0.904	0.999
XP_009160480.1	XP_009153589.1	2647784	2641118	5970.XP_009160480.1	5970.XP_009153589.1	0	0	0	0	0.913	0.945	0.986	0.894	0.999
XP_009158274.1	XP_009157295.1	2645627	2644688	5970.XP_009158274.1	5970.XP_009157295.1	0	0	0	0	0.043	0.908	0.986	0.908	0.999
XP_009160480.1	XP_009152340.1	2647784	2639892	5970.XP_009160480.1	5970.XP_009152340.1	0	0	0	0	0.646	0.357	0.986	0.821	0.999
XP_009159779.1	XP_009157410.1	2647100	2644801	5970.XP_009159779.1	5970.XP_009157410.1	0.052	0	0	0	0.656	0.883	0.986	0.757	0.999
XP_009158281.1	XP_009154668.1	2645634	2642169	5970.XP_009158281.1	5970.XP_009154668.1	0	0	0.466	0.791	0.963	0.987	0.781	0.9	0.999
XP_009157410.1	XP_009152662.1	2644801	2640206	5970.XP_009157410.1	5970.XP_009152662.1	0	0	0.399	0.76	0.963	0.98	0.781	0.898	0.999
XP_009154668.1	XP_009153464.1	2642169	2640994	5970.XP_009154668.1	5970.XP_009153464.1	0	0	0	0	0.624	0.644	0.986	0.809	0.999
XP_009161285.1	XP_009153464.1	2648558	2640994	5970.XP_009161285.1	5970.XP_009153464.1	0	0	0	0	0.582	0.692	0.985	0.825	0.999
XP_009160043.1	XP_009153958.1	2647358	2641478	5970.XP_009160043.1	5970.XP_009153958.1	0	0	0.47	0.867	0.928	0.937	0.781	0.893	0.999
XP_009161285.1	XP_009157410.1	2648558	2644801	5970.XP_009161285.1	5970.XP_009157410.1	0	0	0.44	0.7	0.963	0.908	0.781	0.901	0.999
XP_009161518.1	XP_009158281.1	2648787	2645634	5970.XP_009161518.1	5970.XP_009158281.1	0	0	0.42	0.733	0.963	0.987	0.924	0.898	0.999
XP_009161285.1	XP_009154668.1	2648558	2642169	5970.XP_009161285.1	5970.XP_009154668.1	0	0	0.466	0.798	0.963	0.987	0.781	0.904	0.999
XP_009161518.1	XP_009161285.1	2648787	2648558	5970.XP_009161518.1	5970.XP_009161285.1	0	0	0.385	0.733	0.963	0.97	0.781	0.903	0.999
XP_009161285.1	XP_009159779.1	2648558	2647100	5970.XP_009161285.1	5970.XP_009159779.1	0.052	0	0	0	0.804	0.794	0.985	0.787	0.999
XP_009159812.1	XP_009155698.1	2647133	2643172	5970.XP_009159812.1	5970.XP_009155698.1	0	0	0	0	0.195	0.907	0.986	0.809	0.999
XP_009158274.1	XP_009157485.1	2645627	2644868	5970.XP_009158274.1	5970.XP_009157485.1	0	0	0	0	0.107	0.908	0.986	0.902	0.999
XP_009160602.1	XP_009157483.1	2647903	2644866	5970.XP_009160602.1	5970.XP_009157483.1	0	0	0	0	0	0.98	0.781	0.896	0.999
XP_009154668.1	XP_009152662.1	2642169	2640206	5970.XP_009154668.1	5970.XP_009152662.1	0	0	0.462	0.799	0.963	0.98	0.781	0.897	0.999
XP_009159779.1	XP_009152662.1	2647100	2640206	5970.XP_009159779.1	5970.XP_009152662.1	0.052	0	0	0	0.659	0.883	0.986	0.732	0.999
XP_009161518.1	XP_009154187.1	2648787	2641700	5970.XP_009161518.1	5970.XP_009154187.1	0	0	0	0	0.745	0.97	0.986	0.9	0.999
XP_009158536.1	XP_009157750.1	2645883	2645122	5970.XP_009158536.1	5970.XP_009157750.1	0	0	0	0	0.103	0.69	0.986	0.881	0.999
XP_009153958.1	XP_009152574.1	2641478	2640120	5970.XP_009153958.1	5970.XP_009152574.1	0	0	0	0	0.731	0.907	0.781	0.81	0.998
XP_009158928.1	XP_009152340.1	2646267	2639892	5970.XP_009158928.1	5970.XP_009152340.1	0	0	0	0	0.731	0.074	0.986	0.68	0.998
XP_009153958.1	XP_009153328.1	2641478	2640863	5970.XP_009153958.1	5970.XP_009153328.1	0	0	0	0	0.756	0.908	0.781	0.808	0.998
XP_009160063.1	XP_009154991.1	2647377	2642488	5970.XP_009160063.1	5970.XP_009154991.1	0	0	0	0	0.09	0.862	0.986	0.422	0.998
XP_009154887.1	XP_009152340.1	2642385	2639892	5970.XP_009154887.1	5970.XP_009152340.1	0	0	0	0	0.332	0.357	0.986	0.822	0.998
XP_009155823.1	XP_009152574.1	2643292	2640120	5970.XP_009155823.1	5970.XP_009152574.1	0	0	0	0	0.586	0.907	0.781	0.794	0.998
XP_009160480.1	XP_009153296.1	2647784	2640832	5970.XP_009160480.1	5970.XP_009153296.1	0	0	0	0.584	0.852	0.273	0.986	0.902	0.998
XP_009160863.1	XP_009152327.1	2648156	2639879	5970.XP_009160863.1	5970.XP_009152327.1	0	0	0	0	0.185	0.13	0.986	0.908	0.998
XP_009160424.1	XP_009156690.1	2647729	2644109	5970.XP_009160424.1	5970.XP_009156690.1	0.055	0	0	0	0.051	0	0.986	0.908	0.998
XP_009158928.1	XP_009154887.1	2646267	2642385	5970.XP_009158928.1	5970.XP_009154887.1	0	0	0	0	0.608	0.352	0.986	0.747	0.998
XP_009154100.1	XP_009152327.1	2641617	2639879	5970.XP_009154100.1	5970.XP_009152327.1	0	0	0	0	0.054	0.508	0.96	0.908	0.998
XP_009155823.1	XP_009153328.1	2643292	2640863	5970.XP_009155823.1	5970.XP_009153328.1	0	0	0	0	0.62	0.908	0.781	0.81	0.998
XP_009158537.1	XP_009157798.1	2645884	2645168	5970.XP_009158537.1	5970.XP_009157798.1	0	0	0	0	0.191	0.145	0.986	0.834	0.998
XP_009160553.1	XP_009157067.1	2647854	2644472	5970.XP_009160553.1	5970.XP_009157067.1	0	0	0	0	0.047	0.69	0.986	0.682	0.998
XP_009160043.1	XP_009155823.1	2647358	2643292	5970.XP_009160043.1	5970.XP_009155823.1	0	0	0	0	0.619	0.908	0.781	0.856	0.998
XP_009160450.1	XP_009160396.1	2647754	2647701	5970.XP_009160450.1	5970.XP_009160396.1	0.233	0	0	0	0.531	0.07	0.986	0.798	0.998
XP_009160043.1	XP_009156843.1	2647358	2644254	5970.XP_009160043.1	5970.XP_009156843.1	0	0	0	0	0.667	0.902	0.781	0.839	0.998
XP_009154537.1	XP_009152401.1	2642043	2639953	5970.XP_009154537.1	5970.XP_009152401.1	0	0	0	0	0.186	0.162	0.986	0.827	0.998
XP_009160043.1	XP_009153328.1	2647358	2640863	5970.XP_009160043.1	5970.XP_009153328.1	0	0	0	0	0.719	0.908	0.781	0.808	0.998
XP_009160480.1	XP_009153636.1	2647784	2641163	5970.XP_009160480.1	5970.XP_009153636.1	0	0	0	0	0.22	0.692	0.978	0.683	0.998
XP_009160480.1	XP_009158281.1	2647784	2645634	5970.XP_009160480.1	5970.XP_009158281.1	0	0	0	0	0.948	0.631	0.781	0.788	0.998
XP_009160063.1	XP_009155930.1	2647377	2643393	5970.XP_009160063.1	5970.XP_009155930.1	0	0	0	0	0	0.998	0.448	0.131	0.998
XP_009160986.1	XP_009152340.1	2648271	2639892	5970.XP_009160986.1	5970.XP_009152340.1	0.233	0	0	0	0.654	0.071	0.986	0.752	0.998
XP_009161466.1	XP_009160586.1	2648735	2647887	5970.XP_009161466.1	5970.XP_009160586.1	0	0	0	0	0.684	0.92	0.781	0.682	0.998
XP_009157683.1	XP_009156293.1	2645058	2643742	5970.XP_009157683.1	5970.XP_009156293.1	0	0	0	0	0.048	0.982	0.201	0.833	0.997
XP_009158828.1	XP_009158476.1	2646169	2645823	5970.XP_009158828.1	5970.XP_009158476.1	0.047	0	0	0	0.048	0	0.986	0.84	0.997
XP_009155867.1	XP_009153365.1	2643334	2640899	5970.XP_009155867.1	5970.XP_009153365.1	0.046	0	0	0	0.048	0.07	0.986	0.809	0.997
XP_009161518.1	XP_009161466.1	2648787	2648735	5970.XP_009161518.1	5970.XP_009161466.1	0	0	0	0	0.969	0.688	0	0.73	0.997
XP_009160395.1	XP_009159646.1	2647700	2646972	5970.XP_009160395.1	5970.XP_009159646.1	0	0	0	0	0.152	0.879	0.781	0.908	0.997
XP_009154991.1	XP_009153513.1	2642488	2641043	5970.XP_009154991.1	5970.XP_009153513.1	0	0	0	0	0.102	0.688	0.986	0.306	0.996
XP_009154991.1	XP_009154470.1	2642488	2641976	5970.XP_009154991.1	5970.XP_009154470.1	0	0	0	0	0.051	0.535	0.986	0.429	0.996
XP_009161466.1	XP_009153283.1	2648735	2640819	5970.XP_009161466.1	5970.XP_009153283.1	0	0	0	0	0.962	0.119	0.781	0.611	0.996
XP_009159779.1	XP_009154187.1	2647100	2641700	5970.XP_009159779.1	5970.XP_009154187.1	0	0	0	0	0.671	0.792	0.781	0.777	0.996
XP_009156843.1	XP_009155823.1	2644254	2643292	5970.XP_009156843.1	5970.XP_009155823.1	0	0	0	0	0.634	0.813	0.781	0.772	0.996
XP_009160424.1	XP_009157855.1	2647729	2645223	5970.XP_009160424.1	5970.XP_009157855.1	0	0	0	0	0	0	0.986	0.743	0.996
XP_009158281.1	XP_009153589.1	2645634	2641118	5970.XP_009158281.1	5970.XP_009153589.1	0	0	0	0	0.885	0.565	0.781	0.732	0.996
XP_009154887.1	XP_009153636.1	2642385	2641163	5970.XP_009154887.1	5970.XP_009153636.1	0	0	0	0	0.156	0.326	0.978	0.738	0.996
XP_009159064.1	XP_009153013.1	2646401	2640553	5970.XP_009159064.1	5970.XP_009153013.1	0	0	0.467	0.654	0.744	0.905	0.781	0.908	0.996
XP_009156843.1	XP_009153328.1	2644254	2640863	5970.XP_009156843.1	5970.XP_009153328.1	0	0	0	0	0.599	0.901	0.781	0.679	0.996
XP_009158248.1	XP_009157320.1	2645601	2644713	5970.XP_009158248.1	5970.XP_009157320.1	0.233	0.9	0.463	0	0.182	0.24	0	0.901	0.996
XP_009158537.1	XP_009153365.1	2645884	2640899	5970.XP_009158537.1	5970.XP_009153365.1	0.045	0	0	0	0.183	0.084	0.986	0.702	0.996
XP_009160480.1	XP_009152662.1	2647784	2640206	5970.XP_009160480.1	5970.XP_009152662.1	0	0	0	0	0.913	0.565	0.781	0.61	0.996
XP_009153283.1	XP_009153042.1	2640819	2640582	5970.XP_009153283.1	5970.XP_009153042.1	0	0	0	0	0.132	0.687	0.93	0.82	0.996
XP_009161466.1	XP_009158928.1	2648735	2646267	5970.XP_009161466.1	5970.XP_009158928.1	0.234	0	0	0	0.911	0	0.781	0.785	0.996
XP_009161466.1	XP_009152662.1	2648735	2640206	5970.XP_009161466.1	5970.XP_009152662.1	0	0	0	0	0.969	0.637	0	0.599	0.995
XP_009161518.1	XP_009160480.1	2648787	2647784	5970.XP_009161518.1	5970.XP_009160480.1	0	0	0	0	0.913	0.565	0.781	0.502	0.995
XP_009157855.1	XP_009156690.1	2645223	2644109	5970.XP_009157855.1	5970.XP_009156690.1	0.055	0	0	0	0.05	0	0.986	0.651	0.995
XP_009161518.1	XP_009153589.1	2648787	2641118	5970.XP_009161518.1	5970.XP_009153589.1	0	0	0	0	0.91	0.199	0.781	0.723	0.995
XP_009160031.1	XP_009158873.1	2647346	2646212	5970.XP_009160031.1	5970.XP_009158873.1	0	0	0	0.543	0.664	0.901	0.781	0.908	0.995
XP_009153636.1	XP_009153589.1	2641163	2641118	5970.XP_009153636.1	5970.XP_009153589.1	0	0	0	0	0.245	0	0.978	0.772	0.995
XP_009161466.1	XP_009154668.1	2648735	2642169	5970.XP_009161466.1	5970.XP_009154668.1	0	0	0	0	0.969	0.295	0	0.81	0.995
XP_009158484.1	XP_009157758.1	2645831	2645130	5970.XP_009158484.1	5970.XP_009157758.1	0	0	0	0	0.191	0	0.986	0.603	0.995
XP_009156843.1	XP_009152574.1	2644254	2640120	5970.XP_009156843.1	5970.XP_009152574.1	0	0	0	0	0.655	0.906	0.781	0.421	0.995
XP_009158151.1	XP_009156126.1	2645508	2643584	5970.XP_009158151.1	5970.XP_009156126.1	0.233	0	0	0	0.848	0.692	0.549	0.773	0.995
XP_009158537.1	XP_009158484.1	2645884	2645831	5970.XP_009158537.1	5970.XP_009158484.1	0	0	0	0	0.181	0	0.986	0.677	0.995
XP_009160480.1	XP_009155324.1	2647784	2642815	5970.XP_009160480.1	5970.XP_009155324.1	0	0	0	0	0.885	0.798	0	0.819	0.995
XP_009161518.1	XP_009154887.1	2648787	2642385	5970.XP_009161518.1	5970.XP_009154887.1	0	0	0	0	0.888	0.268	0.781	0.71	0.994
XP_009161285.1	XP_009160480.1	2648558	2647784	5970.XP_009161285.1	5970.XP_009160480.1	0	0	0	0	0.913	0.58	0.781	0.406	0.994
XP_009158696.1	XP_009153042.1	2646037	2640582	5970.XP_009158696.1	5970.XP_009153042.1	0	0	0	0	0.046	0.691	0.93	0.777	0.994
XP_009161647.1	XP_009159754.1	2648912	2647075	5970.XP_009161647.1	5970.XP_009159754.1	0	0	0	0	0.083	0.908	0.549	0.864	0.994
XP_009161466.1	XP_009154991.1	2648735	2642488	5970.XP_009161466.1	5970.XP_009154991.1	0	0	0	0	0.143	0.292	0.986	0.424	0.994
XP_009159940.1	XP_009157485.1	2647257	2644868	5970.XP_009159940.1	5970.XP_009157485.1	0	0	0	0	0.043	0.07	0.986	0.608	0.994
XP_009160553.1	XP_009154100.1	2647854	2641617	5970.XP_009160553.1	5970.XP_009154100.1	0	0	0	0	0	0.282	0.96	0.832	0.994
XP_009161466.1	XP_009158696.1	2648735	2646037	5970.XP_009161466.1	5970.XP_009158696.1	0	0	0	0	0.767	0.651	0.781	0.74	0.994
XP_009157798.1	XP_009157758.1	2645168	2645130	5970.XP_009157798.1	5970.XP_009157758.1	0	0	0	0	0.113	0	0.986	0.604	0.994
XP_009158650.1	XP_009157913.1	2645991	2645276	5970.XP_009158650.1	5970.XP_009157913.1	0	0	0	0	0.042	0.647	0.93	0.809	0.994
XP_009159064.1	XP_009153518.1	2646401	2641048	5970.XP_009159064.1	5970.XP_009153518.1	0.064	0	0.454	0	0.194	0.484	0.781	0.908	0.994
XP_009161466.1	XP_009157410.1	2648735	2644801	5970.XP_009161466.1	5970.XP_009157410.1	0	0	0	0	0.969	0.295	0	0.789	0.994
XP_009159137.1	XP_009157220.1	2646470	2644616	5970.XP_009159137.1	5970.XP_009157220.1	0	0	0	0	0.246	0.902	0.605	0.824	0.994
XP_009159064.1	XP_009152652.1	2646401	2640196	5970.XP_009159064.1	5970.XP_009152652.1	0	0	0.466	0.651	0.375	0.841	0.893	0.908	0.993
XP_009158696.1	XP_009155096.1	2646037	2642592	5970.XP_009158696.1	5970.XP_009155096.1	0	0	0	0	0.05	0.908	0.544	0.857	0.993
XP_009160590.1	XP_009159215.1	2647891	2646547	5970.XP_009160590.1	5970.XP_009159215.1	0.068	0	0	0	0.597	0.634	0.549	0.905	0.993
XP_009159682.1	XP_009152849.1	2647006	2640392	5970.XP_009159682.1	5970.XP_009152849.1	0.183	0	0	0	0	0	0.986	0.464	0.993
XP_009158928.1	XP_009158281.1	2646267	2645634	5970.XP_009158928.1	5970.XP_009158281.1	0	0	0	0	0.846	0.118	0.781	0.805	0.993
XP_009154668.1	XP_009153283.1	2642169	2640819	5970.XP_009154668.1	5970.XP_009153283.1	0	0	0	0	0.878	0.687	0.781	0.311	0.993
XP_009153893.1	XP_009153365.1	2641415	2640899	5970.XP_009153893.1	5970.XP_009153365.1	0.052	0	0	0	0.11	0.117	0.986	0.438	0.993
XP_009161791.1	XP_009158650.1	2649054	2645991	5970.XP_009161791.1	5970.XP_009158650.1	0	0	0	0	0.079	0.794	0.711	0.889	0.993
XP_009159940.1	XP_009158274.1	2647257	2645627	5970.XP_009159940.1	5970.XP_009158274.1	0	0	0	0	0.044	0	0.986	0.582	0.993
XP_009160480.1	XP_009154187.1	2647784	2641700	5970.XP_009160480.1	5970.XP_009154187.1	0	0	0	0	0.732	0.569	0.781	0.774	0.993
XP_009161466.1	XP_009153013.1	2648735	2640553	5970.XP_009161466.1	5970.XP_009153013.1	0.048	0	0	0	0.327	0.802	0.781	0.801	0.993
XP_009161466.1	XP_009154628.1	2648735	2642132	5970.XP_009161466.1	5970.XP_009154628.1	0.196	0	0	0	0.746	0.821	0.781	0.313	0.993
XP_009160590.1	XP_009158696.1	2647891	2646037	5970.XP_009160590.1	5970.XP_009158696.1	0	0	0	0	0.077	0.907	0.549	0.849	0.993
XP_009158281.1	XP_009153283.1	2645634	2640819	5970.XP_009158281.1	5970.XP_009153283.1	0	0	0	0	0.76	0.687	0.781	0.647	0.993
XP_009161466.1	XP_009161285.1	2648735	2648558	5970.XP_009161466.1	5970.XP_009161285.1	0	0	0	0	0.969	0.295	0.164	0.703	0.993
XP_009161466.1	XP_009156183.1	2648735	2643637	5970.XP_009161466.1	5970.XP_009156183.1	0	0	0	0	0.969	0	0.432	0.636	0.993
XP_009153518.1	XP_009153013.1	2641048	2640553	5970.XP_009153518.1	5970.XP_009153013.1	0.064	0	0.439	0	0.145	0.351	0.781	0.901	0.992
XP_009160590.1	XP_009155741.1	2647891	2643213	5970.XP_009160590.1	5970.XP_009155741.1	0	0	0	0	0.118	0.906	0.549	0.827	0.992
XP_009158928.1	XP_009153636.1	2646267	2641163	5970.XP_009158928.1	5970.XP_009153636.1	0	0	0	0	0.218	0	0.978	0.573	0.992
XP_009160602.1	XP_009154860.1	2647903	2642358	5970.XP_009160602.1	5970.XP_009154860.1	0	0	0	0.645	0.088	0.253	0.986	0.833	0.992
XP_009160842.1	XP_009153958.1	2648136	2641478	5970.XP_009160842.1	5970.XP_009153958.1	0	0	0	0	0.05	0.815	0.781	0.824	0.992
XP_009158928.1	XP_009154720.1	2646267	2642220	5970.XP_009158928.1	5970.XP_009154720.1	0	0	0	0	0.913	0.073	0.781	0.623	0.992
XP_009161518.1	XP_009158696.1	2648787	2646037	5970.XP_009161518.1	5970.XP_009158696.1	0	0	0	0	0.759	0.681	0.781	0.617	0.992
XP_009160986.1	XP_009153636.1	2648271	2641163	5970.XP_009160986.1	5970.XP_009153636.1	0	0	0	0	0.219	0	0.978	0.589	0.992
XP_009161466.1	XP_009153296.1	2648735	2640832	5970.XP_009161466.1	5970.XP_009153296.1	0.045	0	0	0	0.585	0.692	0.781	0.778	0.992
XP_009161466.1	XP_009158281.1	2648735	2645634	5970.XP_009161466.1	5970.XP_009158281.1	0	0	0	0	0.969	0.295	0	0.679	0.992
XP_009158696.1	XP_009152662.1	2646037	2640206	5970.XP_009158696.1	5970.XP_009152662.1	0	0	0	0	0.812	0.687	0.781	0.456	0.992
XP_009159765.1	XP_009155891.1	2647086	2643356	5970.XP_009159765.1	5970.XP_009155891.1	0	0	0	0	0.044	0.615	0.93	0.719	0.991
XP_009156690.1	XP_009153365.1	2644109	2640899	5970.XP_009156690.1	5970.XP_009153365.1	0.048	0	0	0	0.085	0.154	0.986	0.295	0.991
XP_009161064.1	XP_009158873.1	2648346	2646212	5970.XP_009161064.1	5970.XP_009158873.1	0	0	0	0	0.054	0.903	0.549	0.809	0.991
XP_009159146.1	XP_009157671.1	2646479	2645047	5970.XP_009159146.1	5970.XP_009157671.1	0	0	0.479	0.833	0.046	0.273	0.986	0.905	0.991
XP_009161466.1	XP_009159064.1	2648735	2646401	5970.XP_009161466.1	5970.XP_009159064.1	0.048	0	0	0	0.63	0.663	0.781	0.734	0.991
XP_009160480.1	XP_009154668.1	2647784	2642169	5970.XP_009160480.1	5970.XP_009154668.1	0	0	0	0	0.913	0.268	0.781	0.437	0.991
XP_009158281.1	XP_009154887.1	2645634	2642385	5970.XP_009158281.1	5970.XP_009154887.1	0	0	0	0	0.734	0.28	0.781	0.82	0.991
XP_009161466.1	XP_009154887.1	2648735	2642385	5970.XP_009161466.1	5970.XP_009154887.1	0.045	0	0	0	0.422	0.691	0.781	0.808	0.991
XP_009161466.1	XP_009157354.1	2648735	2644747	5970.XP_009161466.1	5970.XP_009157354.1	0.048	0	0	0	0.105	0.907	0.549	0.795	0.991
XP_009158696.1	XP_009158281.1	2646037	2645634	5970.XP_009158696.1	5970.XP_009158281.1	0	0	0	0	0.672	0.692	0.781	0.667	0.991
XP_009158484.1	XP_009156690.1	2645831	2644109	5970.XP_009158484.1	5970.XP_009156690.1	0.047	0	0	0	0.27	0	0.986	0.234	0.991
XP_009155324.1	XP_009154187.1	2642815	2641700	5970.XP_009155324.1	5970.XP_009154187.1	0	0	0	0	0.876	0.281	0.401	0.867	0.991
XP_009157758.1	XP_009156690.1	2645130	2644109	5970.XP_009157758.1	5970.XP_009156690.1	0.052	0	0	0	0.178	0	0.986	0.335	0.991
XP_009161466.1	XP_009160480.1	2648735	2647784	5970.XP_009161466.1	5970.XP_009160480.1	0.045	0	0	0	0.727	0.35	0.781	0.808	0.991
XP_009160424.1	XP_009152849.1	2647729	2640392	5970.XP_009160424.1	5970.XP_009152849.1	0.074	0	0	0	0.088	0	0.986	0.301	0.99
XP_009154887.1	XP_009154668.1	2642385	2642169	5970.XP_009154887.1	5970.XP_009154668.1	0	0	0	0	0.902	0.278	0.781	0.433	0.99
XP_009161725.1	XP_009158828.1	2648988	2646169	5970.XP_009161725.1	5970.XP_009158828.1	0.203	0	0	0	0	0	0.986	0.233	0.99
XP_009161490.1	XP_009153636.1	2648759	2641163	5970.XP_009161490.1	5970.XP_009153636.1	0	0	0	0	0.184	0	0.978	0.499	0.99
XP_009159940.1	XP_009157295.1	2647257	2644688	5970.XP_009159940.1	5970.XP_009157295.1	0	0	0	0	0	0	0.986	0.369	0.99
XP_009158928.1	XP_009154668.1	2646267	2642169	5970.XP_009158928.1	5970.XP_009154668.1	0	0	0	0	0.913	0.083	0.781	0.501	0.99
XP_009159812.1	XP_009157112.1	2647133	2644516	5970.XP_009159812.1	5970.XP_009157112.1	0	0	0	0	0.057	0.691	0.781	0.865	0.99
XP_009154668.1	XP_009153589.1	2642169	2641118	5970.XP_009154668.1	5970.XP_009153589.1	0	0	0	0	0.913	0.199	0.781	0.438	0.99
XP_009158537.1	XP_009154145.1	2645884	2641659	5970.XP_009158537.1	5970.XP_009154145.1	0.054	0	0	0	0.118	0	0.986	0.311	0.99
XP_009159230.1	XP_009152327.1	2646562	2639879	5970.XP_009159230.1	5970.XP_009152327.1	0	0	0	0.565	0.043	0.276	0.986	0.317	0.99
XP_009161490.1	XP_009154187.1	2648759	2641700	5970.XP_009161490.1	5970.XP_009154187.1	0	0	0	0	0.698	0.323	0.781	0.818	0.99
XP_009158696.1	XP_009157410.1	2646037	2644801	5970.XP_009158696.1	5970.XP_009157410.1	0	0	0	0	0.67	0.689	0.781	0.577	0.989
XP_009156690.1	XP_009152260.1	2644109	2639816	5970.XP_009156690.1	5970.XP_009152260.1	0	0	0	0	0	0	0.986	0.312	0.989
XP_009161518.1	XP_009155324.1	2648787	2642815	5970.XP_009161518.1	5970.XP_009155324.1	0	0	0	0	0.898	0.316	0.401	0.77	0.989
XP_009160480.1	XP_009157410.1	2647784	2644801	5970.XP_009160480.1	5970.XP_009157410.1	0	0	0	0	0.848	0.268	0.781	0.638	0.989
XP_009160590.1	XP_009153518.1	2647891	2641048	5970.XP_009160590.1	5970.XP_009153518.1	0.049	0	0	0	0.182	0.903	0.391	0.809	0.989
XP_009158696.1	XP_009154668.1	2646037	2642169	5970.XP_009158696.1	5970.XP_009154668.1	0	0	0	0	0.848	0.282	0.781	0.607	0.989
XP_009157295.1	XP_009153041.1	2644688	2640581	5970.XP_009157295.1	5970.XP_009153041.1	0	0	0	0	0.043	0.879	0.549	0.81	0.988
XP_009154991.1	XP_009152868.1	2642488	2640410	5970.XP_009154991.1	5970.XP_009152868.1	0	0	0	0	0.053	0.177	0.979	0.393	0.988
XP_009157855.1	XP_009152260.1	2645223	2639816	5970.XP_009157855.1	5970.XP_009152260.1	0	0	0	0	0.046	0.07	0.986	0.154	0.988
XP_009161466.1	XP_009153720.1	2648735	2641243	5970.XP_009161466.1	5970.XP_009153720.1	0	0	0	0	0.105	0.689	0.781	0.837	0.988
XP_009157798.1	XP_009154145.1	2645168	2641659	5970.XP_009157798.1	5970.XP_009154145.1	0	0	0	0	0.143	0.07	0.986	0.118	0.988
XP_009155701.1	XP_009154145.1	2643175	2641659	5970.XP_009155701.1	5970.XP_009154145.1	0.054	0	0	0	0.118	0	0.986	0.143	0.988
XP_009160424.1	XP_009152260.1	2647729	2639816	5970.XP_009160424.1	5970.XP_009152260.1	0	0	0	0	0	0.07	0.986	0.19	0.988
XP_009161518.1	XP_009156183.1	2648787	2643637	5970.XP_009161518.1	5970.XP_009156183.1	0	0	0	0	0.963	0.253	0	0.606	0.988
XP_009161279.1	XP_009158537.1	2648552	2645884	5970.XP_009161279.1	5970.XP_009158537.1	0.054	0	0	0	0.144	0	0.986	0.076	0.988
XP_009159440.1	XP_009157418.1	2646770	2644807	5970.XP_009159440.1	5970.XP_009157418.1	0	0	0	0	0.086	0.692	0.781	0.84	0.988
XP_009160518.1	XP_009153365.1	2647819	2640899	5970.XP_009160518.1	5970.XP_009153365.1	0	0	0	0	0.108	0.118	0.986	0	0.988
XP_009157358.1	XP_009153365.1	2644751	2640899	5970.XP_009157358.1	5970.XP_009153365.1	0	0	0	0	0.108	0.118	0.986	0	0.988
XP_009161279.1	XP_009154145.1	2648552	2641659	5970.XP_009161279.1	5970.XP_009154145.1	0	0	0.478	0.802	0.09	0	0.986	0.31	0.988
XP_009159137.1	XP_009157728.1	2646470	2645101	5970.XP_009159137.1	5970.XP_009157728.1	0	0	0	0	0.143	0.685	0.605	0.9	0.987
XP_009161144.1	XP_009153365.1	2648423	2640899	5970.XP_009161144.1	5970.XP_009153365.1	0	0	0	0	0.174	0	0.986	0	0.987
XP_009157855.1	XP_009152849.1	2645223	2640392	5970.XP_009157855.1	5970.XP_009152849.1	0.074	0	0	0	0.053	0	0.986	0.107	0.987
XP_009158696.1	XP_009153296.1	2646037	2640832	5970.XP_009158696.1	5970.XP_009153296.1	0	0	0	0	0.72	0.601	0.781	0.561	0.987
XP_009153589.1	XP_009152662.1	2641118	2640206	5970.XP_009153589.1	5970.XP_009152662.1	0	0	0	0	0.912	0.199	0.781	0.312	0.987
XP_009158007.1	XP_009153365.1	2645367	2640899	5970.XP_009158007.1	5970.XP_009153365.1	0	0	0	0	0.174	0	0.986	0	0.987
XP_009155096.1	XP_009153283.1	2642592	2640819	5970.XP_009155096.1	5970.XP_009153283.1	0	0	0	0	0.043	0.908	0.544	0.736	0.987
XP_009160063.1	XP_009157483.1	2647377	2644866	5970.XP_009160063.1	5970.XP_009157483.1	0	0	0	0	0.044	0.908	0.781	0.439	0.987
XP_009161518.1	XP_009153283.1	2648787	2640819	5970.XP_009161518.1	5970.XP_009153283.1	0	0	0	0	0.664	0.681	0.781	0.542	0.987
XP_009159064.1	XP_009158455.1	2646401	2645802	5970.XP_009159064.1	5970.XP_009158455.1	0.064	0	0	0	0.201	0.284	0.781	0.908	0.987
XP_009161466.1	XP_009160450.1	2648735	2647754	5970.XP_009161466.1	5970.XP_009160450.1	0.043	0	0	0	0.969	0.118	0	0.593	0.987
XP_009160590.1	XP_009156318.1	2647891	2643763	5970.XP_009160590.1	5970.XP_009156318.1	0	0	0	0	0.198	0.687	0.548	0.904	0.987
XP_009160424.1	XP_009153365.1	2647729	2640899	5970.XP_009160424.1	5970.XP_009153365.1	0.049	0	0	0	0	0	0.986	0.087	0.986
XP_009161647.1	XP_009160590.1	2648912	2647891	5970.XP_009161647.1	5970.XP_009160590.1	0	0	0	0	0.122	0.688	0.544	0.908	0.986
XP_009152651.1	XP_009152650.1	2640195	2640194	5970.XP_009152651.1	5970.XP_009152650.1	0	0	0	0	0.606	0.273	0.605	0.892	0.986
XP_009153575.1	BNA5	2641104	2641018	5970.XP_009153575.1	5970.XP_009153488.1	0	0	0	0	0.071	0	0.986	0.051	0.986
XP_009153365.1	XP_009152351.1	2640899	2639903	5970.XP_009153365.1	5970.XP_009152351.1	0.046	0	0	0	0.048	0.07	0.986	0.067	0.986
XP_009159765.1	XP_009154929.1	2647086	2642426	5970.XP_009159765.1	5970.XP_009154929.1	0	0	0	0	0.098	0.497	0.951	0.464	0.986
XP_009157855.1	XP_009153365.1	2645223	2640899	5970.XP_009157855.1	5970.XP_009153365.1	0.049	0	0	0	0	0	0.986	0.053	0.986
XP_009161566.1	XP_009154929.1	2648833	2642426	5970.XP_009161566.1	5970.XP_009154929.1	0	0	0	0	0.098	0.497	0.951	0.464	0.986
XP_009161466.1	XP_009152340.1	2648735	2639892	5970.XP_009161466.1	5970.XP_009152340.1	0	0	0	0	0.568	0.691	0.781	0.601	0.986
XP_009156885.1	XP_009155026.1	2644296	2642523	5970.XP_009156885.1	5970.XP_009155026.1	0.062	0	0	0	0	0	0.986	0.077	0.986
XP_009158455.1	XP_009153013.1	2645802	2640553	5970.XP_009158455.1	5970.XP_009153013.1	0.064	0	0	0	0.142	0.284	0.781	0.903	0.985
XP_009158281.1	XP_009155324.1	2645634	2642815	5970.XP_009158281.1	5970.XP_009155324.1	0	0	0	0	0.849	0.274	0.401	0.809	0.985
XP_009158274.1	XP_009153555.1	2645627	2641084	5970.XP_009158274.1	5970.XP_009153555.1	0	0	0	0	0.104	0.677	0.549	0.905	0.985
XP_009161285.1	XP_009153283.1	2648558	2640819	5970.XP_009161285.1	5970.XP_009153283.1	0	0	0	0	0.646	0.681	0.781	0.486	0.985
XP_009160986.1	XP_009154668.1	2648271	2642169	5970.XP_009160986.1	5970.XP_009154668.1	0	0	0	0	0.913	0.082	0.781	0.249	0.985
XP_009158928.1	XP_009158696.1	2646267	2646037	5970.XP_009158928.1	5970.XP_009158696.1	0	0	0	0	0.719	0.118	0.781	0.769	0.985
XP_009160986.1	XP_009158281.1	2648271	2645634	5970.XP_009160986.1	5970.XP_009158281.1	0	0	0	0	0.851	0.073	0.781	0.576	0.985
XP_009160842.1	XP_009160043.1	2648136	2647358	5970.XP_009160842.1	5970.XP_009160043.1	0	0	0	0	0.052	0.635	0.781	0.834	0.985
XP_009160191.1	BNA5	2647503	2641018	5970.XP_009160191.1	5970.XP_009153488.1	0	0	0	0	0.053	0	0.984	0.051	0.984
XP_009159263.1	XP_009157798.1	2646595	2645168	5970.XP_009159263.1	5970.XP_009157798.1	0	0	0	0	0.05	0	0.981	0.234	0.984
XP_009156318.1	XP_009155096.1	2643763	2642592	5970.XP_009156318.1	5970.XP_009155096.1	0	0	0	0	0.054	0.69	0.479	0.908	0.984
XP_009161466.1	XP_009153589.1	2648735	2641118	5970.XP_009161466.1	5970.XP_009153589.1	0	0	0	0	0.749	0	0.781	0.735	0.984
XP_009159263.1	XP_009158884.1	2646595	2646223	5970.XP_009159263.1	5970.XP_009158884.1	0.06	0	0	0	0	0.07	0.981	0.1	0.983
XP_009160063.1	XP_009158706.1	2647377	2646047	5970.XP_009160063.1	5970.XP_009158706.1	0	0	0	0	0.054	0.807	0.781	0.636	0.983
XP_009159215.1	XP_009159064.1	2646547	2646401	5970.XP_009159215.1	5970.XP_009159064.1	0.052	0	0	0	0.184	0.658	0.702	0.828	0.983
XP_009158281.1	XP_009155917.1	2645634	2643380	5970.XP_009158281.1	5970.XP_009155917.1	0	0	0	0	0.669	0.688	0.401	0.751	0.982
XP_009154887.1	XP_009154187.1	2642385	2641700	5970.XP_009154887.1	5970.XP_009154187.1	0	0	0	0	0.431	0.279	0.781	0.827	0.982
XP_009160063.1	XP_009160043.1	2647377	2647358	5970.XP_009160063.1	5970.XP_009160043.1	0	0	0	0	0.091	0.908	0.781	0.154	0.982
XP_009154887.1	XP_009152662.1	2642385	2640206	5970.XP_009154887.1	5970.XP_009152662.1	0	0	0	0	0.753	0.268	0.781	0.604	0.982
XP_009156183.1	XP_009152662.1	2643637	2640206	5970.XP_009156183.1	5970.XP_009152662.1	0	0	0	0	0.963	0.118	0	0.477	0.981
XP_009159215.1	XP_009153518.1	2646547	2641048	5970.XP_009159215.1	5970.XP_009153518.1	0	0	0	0	0.181	0.609	0.702	0.829	0.981
XP_009154148.1	XP_009153365.1	2641662	2640899	5970.XP_009154148.1	5970.XP_009153365.1	0	0	0	0	0.133	0	0.979	0	0.981
XP_009161285.1	XP_009158928.1	2648558	2646267	5970.XP_009161285.1	5970.XP_009158928.1	0	0	0	0	0.881	0.074	0.781	0.311	0.981
XP_009161285.1	XP_009155324.1	2648558	2642815	5970.XP_009161285.1	5970.XP_009155324.1	0	0	0	0	0.913	0.28	0.401	0.567	0.981
XP_009160842.1	XP_009152574.1	2648136	2640120	5970.XP_009160842.1	5970.XP_009152574.1	0	0	0	0	0.045	0.689	0.781	0.747	0.981
XP_009155324.1	XP_009154668.1	2642815	2642169	5970.XP_009155324.1	5970.XP_009154668.1	0	0	0	0	0.913	0.278	0.401	0.571	0.981
XP_009161285.1	XP_009154887.1	2648558	2642385	5970.XP_009161285.1	5970.XP_009154887.1	0	0	0	0	0.847	0.268	0.781	0.31	0.98
XP_009158928.1	XP_009154187.1	2646267	2641700	5970.XP_009158928.1	5970.XP_009154187.1	0	0	0	0	0.745	0	0.781	0.677	0.98
XP_009158643.1	XP_009157863.1	2645984	2645231	5970.XP_009158643.1	5970.XP_009157863.1	0	0	0	0	0.66	0.596	0	0.872	0.98
XP_009157410.1	XP_009154887.1	2644801	2642385	5970.XP_009157410.1	5970.XP_009154887.1	0	0	0	0	0.713	0.268	0.781	0.624	0.98
XP_009153589.1	XP_009153464.1	2641118	2640994	5970.XP_009153589.1	5970.XP_009153464.1	0	0	0	0	0.625	0.072	0.781	0.772	0.98
XP_009160590.1	XP_009155096.1	2647891	2642592	5970.XP_009160590.1	5970.XP_009155096.1	0	0	0	0	0.054	0.622	0.544	0.893	0.98
XP_009157410.1	XP_009153589.1	2644801	2641118	5970.XP_009157410.1	5970.XP_009153589.1	0	0	0	0	0.732	0.199	0.781	0.632	0.98
XP_009153283.1	XP_009152662.1	2640819	2640206	5970.XP_009153283.1	5970.XP_009152662.1	0	0	0	0	0.746	0.246	0.781	0.567	0.979
XP_009155049.1	XP_009152327.1	2642546	2639879	5970.XP_009155049.1	5970.XP_009152327.1	0	0	0	0	0.104	0.597	0.443	0.908	0.979
XP_009161466.1	XP_009160986.1	2648735	2648271	5970.XP_009161466.1	5970.XP_009160986.1	0.233	0	0	0	0.731	0	0.781	0.608	0.979
XP_009155324.1	XP_009152662.1	2642815	2640206	5970.XP_009155324.1	5970.XP_009152662.1	0	0	0	0	0.803	0.272	0.401	0.788	0.979
XP_009161285.1	XP_009153589.1	2648558	2641118	5970.XP_009161285.1	5970.XP_009153589.1	0	0	0	0	0.852	0.199	0.781	0.31	0.979
XP_009153518.1	XP_009152652.1	2641048	2640196	5970.XP_009153518.1	5970.XP_009152652.1	0.064	0	0.443	0	0.126	0.279	0.468	0.904	0.979
XP_009160063.1	XP_009158669.1	2647377	2646010	5970.XP_009160063.1	5970.XP_009158669.1	0	0	0	0	0.043	0.908	0.781	0.083	0.979
XP_009157067.1	XP_009154100.1	2644472	2641617	5970.XP_009157067.1	5970.XP_009154100.1	0	0	0	0	0	0	0.96	0.498	0.979
XP_009161466.1	XP_009153636.1	2648735	2641163	5970.XP_009161466.1	5970.XP_009153636.1	0	0	0	0	0.131	0.908	0.549	0.497	0.979
XP_009161518.1	XP_009161490.1	2648787	2648759	5970.XP_009161518.1	5970.XP_009161490.1	0	0	0	0	0.751	0.138	0.781	0.601	0.978
XP_009161466.1	XP_009160361.1	2648735	2647668	5970.XP_009161466.1	5970.XP_009160361.1	0.048	0	0	0	0.054	0.688	0.781	0.707	0.978
XP_009159541.1	XP_009158281.1	2646869	2645634	5970.XP_009159541.1	5970.XP_009158281.1	0	0	0	0	0.607	0.692	0.305	0.772	0.978
XP_009160480.1	XP_009158696.1	2647784	2646037	5970.XP_009160480.1	5970.XP_009158696.1	0	0	0	0	0.71	0.272	0.781	0.595	0.978
XP_009155917.1	XP_009155324.1	2643380	2642815	5970.XP_009155917.1	5970.XP_009155324.1	0	0	0	0	0.605	0.265	0.401	0.889	0.978
XP_009160842.1	XP_009153328.1	2648136	2640863	5970.XP_009160842.1	5970.XP_009153328.1	0	0	0	0	0.099	0.645	0.781	0.731	0.978
XP_009159215.1	XP_009158455.1	2646547	2645802	5970.XP_009159215.1	5970.XP_009158455.1	0	0	0	0	0.104	0.627	0.702	0.809	0.978
XP_009158828.1	XP_009154767.1	2646169	2642266	5970.XP_009158828.1	5970.XP_009154767.1	0	0	0	0	0.211	0	0.967	0.233	0.978
XP_009160986.1	XP_009153283.1	2648271	2640819	5970.XP_009160986.1	5970.XP_009153283.1	0	0	0	0	0.627	0.184	0.781	0.701	0.977
XP_009161647.1	XP_009156318.1	2648912	2643763	5970.XP_009161647.1	5970.XP_009156318.1	0	0	0	0	0.125	0.596	0.479	0.892	0.977
XP_009158828.1	XP_009153779.1	2646169	2641302	5970.XP_009158828.1	5970.XP_009153779.1	0.068	0	0	0	0.052	0	0.967	0.311	0.977
XP_009158696.1	XP_009153589.1	2646037	2641118	5970.XP_009158696.1	5970.XP_009153589.1	0	0	0	0	0.759	0.133	0.781	0.566	0.977
XP_009161490.1	XP_009158281.1	2648759	2645634	5970.XP_009161490.1	5970.XP_009158281.1	0	0	0	0	0.708	0.138	0.781	0.639	0.977
XP_009154187.1	XP_009153589.1	2641700	2641118	5970.XP_009154187.1	5970.XP_009153589.1	0	0	0	0	0.731	0.079	0.781	0.642	0.977
XP_009161466.1	XP_009153125.1	2648735	2640663	5970.XP_009161466.1	5970.XP_009153125.1	0	0	0	0	0.969	0	0	0.312	0.977
XP_009158828.1	XP_009153954.1	2646169	2641474	5970.XP_009158828.1	5970.XP_009153954.1	0	0	0	0	0.2	0	0.967	0.233	0.977
XP_009158928.1	XP_009152662.1	2646267	2640206	5970.XP_009158928.1	5970.XP_009152662.1	0	0	0	0	0.851	0.074	0.781	0.301	0.976
XP_009154720.1	XP_009154668.1	2642220	2642169	5970.XP_009154720.1	5970.XP_009154668.1	0.059	0	0.348	0	0.824	0.264	0	0.753	0.976
XP_009161285.1	XP_009158696.1	2648558	2646037	5970.XP_009161285.1	5970.XP_009158696.1	0	0	0	0	0.665	0.282	0.781	0.61	0.976
XP_009159646.1	XP_009154537.1	2646972	2642043	5970.XP_009159646.1	5970.XP_009154537.1	0	0	0	0	0.103	0	0.781	0.892	0.976
XP_009158281.1	XP_009156183.1	2645634	2643637	5970.XP_009158281.1	5970.XP_009156183.1	0	0	0	0	0.963	0.118	0	0.331	0.976
XP_009158928.1	XP_009157410.1	2646267	2644801	5970.XP_009158928.1	5970.XP_009157410.1	0	0	0	0	0.744	0.074	0.781	0.597	0.976
XP_009159812.1	XP_009156293.1	2647133	2643742	5970.XP_009159812.1	5970.XP_009156293.1	0	0	0	0	0.101	0.811	0	0.87	0.975
XP_009161299.1	XP_009154720.1	2648572	2642220	5970.XP_009161299.1	5970.XP_009154720.1	0	0	0	0	0.327	0.688	0.463	0.808	0.975
XP_009158757.1	XP_009152327.1	2646098	2639879	5970.XP_009158757.1	5970.XP_009152327.1	0	0	0	0	0.333	0.633	0	0.908	0.975
XP_009158928.1	XP_009153283.1	2646267	2640819	5970.XP_009158928.1	5970.XP_009153283.1	0	0	0	0	0.615	0.285	0.781	0.639	0.975
XP_009154720.1	XP_009152662.1	2642220	2640206	5970.XP_009154720.1	5970.XP_009152662.1	0.059	0	0.322	0	0.731	0.264	0.305	0.772	0.975
XP_009159541.1	XP_009155917.1	2646869	2643380	5970.XP_009159541.1	5970.XP_009155917.1	0	0	0	0	0.176	0.692	0.549	0.811	0.975
XP_009157728.1	XP_009154611.1	2645101	2642115	5970.XP_009157728.1	5970.XP_009154611.1	0	0	0	0	0.173	0.69	0.605	0.785	0.975
XP_009158455.1	XP_009153518.1	2645802	2641048	5970.XP_009158455.1	5970.XP_009153518.1	0	0	0	0.603	0.189	0.794	0.781	0.908	0.974
XP_009155049.1	XP_009154537.1	2642546	2642043	5970.XP_009155049.1	5970.XP_009154537.1	0	0	0	0	0	0.071	0.781	0.885	0.974
XP_009159146.1	XP_009156318.1	2646479	2643763	5970.XP_009159146.1	5970.XP_009156318.1	0	0	0	0	0.19	0.689	0	0.908	0.974
XP_009159812.1	XP_009159025.1	2647133	2646363	5970.XP_009159812.1	5970.XP_009159025.1	0	0	0	0	0.055	0.687	0.781	0.649	0.974
XP_009161490.1	XP_009153464.1	2648759	2640994	5970.XP_009161490.1	5970.XP_009153464.1	0	0	0	0	0.617	0.083	0.781	0.691	0.973
XP_009159215.1	XP_009153013.1	2646547	2640553	5970.XP_009159215.1	5970.XP_009153013.1	0.052	0	0	0	0.339	0.268	0.702	0.834	0.973
XP_009159541.1	XP_009153283.1	2646869	2640819	5970.XP_009159541.1	5970.XP_009153283.1	0	0	0	0	0.346	0.872	0.507	0.441	0.973
XP_009161489.1	XP_009158643.1	2648758	2645984	5970.XP_009161489.1	5970.XP_009158643.1	0	0	0	0	0.571	0.689	0	0.816	0.973
XP_009157483.1	XP_009156293.1	2644866	2643742	5970.XP_009157483.1	5970.XP_009156293.1	0	0	0	0	0.141	0.799	0.201	0.832	0.973
XP_009156183.1	XP_009154668.1	2643637	2642169	5970.XP_009156183.1	5970.XP_009154668.1	0	0	0	0	0.963	0.118	0	0.232	0.972
XP_009153296.1	XP_009153013.1	2640832	2640553	5970.XP_009153296.1	5970.XP_009153013.1	0	0	0	0	0.731	0.241	0.357	0.813	0.972
XP_009154914.1	XP_009152654.1	2642411	2640198	5970.XP_009154914.1	5970.XP_009152654.1	0	0	0	0	0.05	0.492	0.781	0.773	0.972
XP_009161064.1	XP_009160031.1	2648346	2647346	5970.XP_009161064.1	5970.XP_009160031.1	0	0	0	0	0.099	0.692	0.549	0.809	0.972
XP_009160630.1	XP_009160063.1	2647930	2647377	5970.XP_009160630.1	5970.XP_009160063.1	0	0	0	0	0.048	0.859	0.549	0.605	0.972
XP_009160602.1	XP_009154761.1	2647903	2642260	5970.XP_009160602.1	5970.XP_009154761.1	0	0	0	0	0.045	0.168	0.781	0.863	0.972
XP_009160590.1	XP_009153283.1	2647891	2640819	5970.XP_009160590.1	5970.XP_009153283.1	0	0	0	0	0.077	0.856	0.549	0.6	0.972
XP_009161566.1	XP_009157418.1	2648833	2644807	5970.XP_009161566.1	5970.XP_009157418.1	0	0	0	0	0.089	0.614	0.373	0.888	0.972
XP_009160986.1	XP_009154187.1	2648271	2641700	5970.XP_009160986.1	5970.XP_009154187.1	0	0	0	0	0.7	0	0.781	0.619	0.972
XP_009158792.1	XP_009155865.1	2646133	2643332	5970.XP_009158792.1	5970.XP_009155865.1	0	0	0	0	0.66	0.284	0.426	0.824	0.972
XP_009159137.1	XP_009154611.1	2646470	2642115	5970.XP_009159137.1	5970.XP_009154611.1	0	0	0	0	0.13	0.69	0.605	0.772	0.972
XP_009159541.1	XP_009158696.1	2646869	2646037	5970.XP_009159541.1	5970.XP_009158696.1	0	0	0	0	0.255	0.9	0.507	0.317	0.971
XP_009158696.1	XP_009154187.1	2646037	2641700	5970.XP_009158696.1	5970.XP_009154187.1	0	0	0	0	0.571	0.269	0.781	0.639	0.971
XP_009158696.1	XP_009155917.1	2646037	2643380	5970.XP_009158696.1	5970.XP_009155917.1	0	0	0	0	0.184	0.895	0.466	0.459	0.971
XP_009158589.1	XP_009157485.1	2645936	2644868	5970.XP_009158589.1	5970.XP_009157485.1	0	0	0	0	0.044	0.622	0.781	0.68	0.971
XP_009160484.1	XP_009154761.1	2647788	2642260	5970.XP_009160484.1	5970.XP_009154761.1	0	0	0	0	0.042	0.275	0.781	0.836	0.971
XP_009157528.1	XP_009155610.1	2644907	2643089	5970.XP_009157528.1	5970.XP_009155610.1	0	0	0	0	0.071	0.687	0.547	0.808	0.971
XP_009153589.1	XP_009153283.1	2641118	2640819	5970.XP_009153589.1	5970.XP_009153283.1	0	0	0	0	0.615	0.084	0.781	0.674	0.971
XP_009160590.1	XP_009159742.1	2647891	2647063	5970.XP_009160590.1	5970.XP_009159742.1	0.07	0	0	0	0.118	0.687	0.535	0.795	0.971
XP_009156345.1	NBP35	2643788	2640609	5970.XP_009156345.1	5970.XP_009153069.1	0	0	0	0	0.085	0.505	0.448	0.901	0.971
XP_009161518.1	XP_009158928.1	2648787	2646267	5970.XP_009161518.1	5970.XP_009158928.1	0	0	0	0	0.837	0.085	0.781	0.233	0.971
XP_009161490.1	XP_009154668.1	2648759	2642169	5970.XP_009161490.1	5970.XP_009154668.1	0	0	0	0	0.766	0.278	0.781	0.311	0.971
XP_009158281.1	XP_009157863.1	2645634	2645231	5970.XP_009158281.1	5970.XP_009157863.1	0	0	0	0	0.653	0.651	0	0.783	0.971
XP_009160361.1	XP_009152498.1	2647668	2640046	5970.XP_009160361.1	5970.XP_009152498.1	0	0	0	0.583	0.195	0.901	0.549	0.577	0.97
XP_009158928.1	XP_009154628.1	2646267	2642132	5970.XP_009158928.1	5970.XP_009154628.1	0	0	0	0	0.848	0.073	0.781	0.155	0.97
XP_009157528.1	XP_009153606.1	2644907	2641133	5970.XP_009157528.1	5970.XP_009153606.1	0	0	0	0	0.079	0.323	0.549	0.908	0.97
XP_009161518.1	XP_009154720.1	2648787	2642220	5970.XP_009161518.1	5970.XP_009154720.1	0.059	0	0.271	0	0.817	0.264	0	0.731	0.97
XP_009155324.1	XP_009154887.1	2642815	2642385	5970.XP_009155324.1	5970.XP_009154887.1	0	0	0	0	0.82	0.3	0	0.78	0.969
XP_009159742.1	XP_009157528.1	2647063	2644907	5970.XP_009159742.1	5970.XP_009157528.1	0	0	0	0	0.17	0.66	0.494	0.81	0.969
XP_009154720.1	XP_009153589.1	2642220	2641118	5970.XP_009154720.1	5970.XP_009153589.1	0	0	0	0	0.66	0.277	0.781	0.499	0.969
XP_009161285.1	XP_009160986.1	2648558	2648271	5970.XP_009161285.1	5970.XP_009160986.1	0	0	0	0	0.847	0.073	0.781	0.136	0.969
XP_009157220.1	XP_009154611.1	2644616	2642115	5970.XP_009157220.1	5970.XP_009154611.1	0	0	0	0	0.192	0.565	0.605	0.808	0.969
XP_009156701.1	XP_009153606.1	2644119	2641133	5970.XP_009156701.1	5970.XP_009153606.1	0	0	0	0	0.101	0.279	0.549	0.908	0.969
XP_009161299.1	XP_009155324.1	2648572	2642815	5970.XP_009161299.1	5970.XP_009155324.1	0	0	0	0	0.682	0.137	0	0.895	0.968
XP_009154887.1	XP_009154720.1	2642385	2642220	5970.XP_009154887.1	5970.XP_009154720.1	0	0	0	0	0.415	0.265	0.781	0.707	0.968
XP_009159215.1	XP_009155096.1	2646547	2642592	5970.XP_009159215.1	5970.XP_009155096.1	0	0	0	0	0.054	0.619	0.544	0.83	0.968
XP_009161489.1	XP_009157863.1	2648758	2645231	5970.XP_009161489.1	5970.XP_009157863.1	0	0	0	0	0.603	0.691	0	0.761	0.968
XP_009160986.1	XP_009152662.1	2648271	2640206	5970.XP_009160986.1	5970.XP_009152662.1	0	0	0	0	0.731	0.073	0.781	0.496	0.968
XP_009159064.1	XP_009153296.1	2646401	2640832	5970.XP_009159064.1	5970.XP_009153296.1	0	0	0	0	0.715	0.273	0.357	0.794	0.968
XP_009157483.1	XP_009154761.1	2644866	2642260	5970.XP_009157483.1	5970.XP_009154761.1	0	0	0	0	0	0.303	0.781	0.81	0.968
XP_009160063.1	XP_009153236.1	2647377	2640773	5970.XP_009160063.1	5970.XP_009153236.1	0	0	0	0	0.053	0.689	0.781	0.575	0.968
XP_009161490.1	XP_009157410.1	2648759	2644801	5970.XP_009161490.1	5970.XP_009157410.1	0	0	0	0	0.647	0.138	0.781	0.572	0.967
XP_009161285.1	XP_009156183.1	2648558	2643637	5970.XP_009161285.1	5970.XP_009156183.1	0	0	0	0	0.962	0.118	0	0.111	0.967
XP_009161647.1	XP_009159215.1	2648912	2646547	5970.XP_009161647.1	5970.XP_009159215.1	0	0	0	0	0.171	0.268	0.544	0.898	0.967
XP_009159064.1	XP_009154887.1	2646401	2642385	5970.XP_009159064.1	5970.XP_009154887.1	0	0	0	0	0.628	0.684	0	0.743	0.967
XP_009161064.1	XP_009158499.1	2648346	2645846	5970.XP_009161064.1	5970.XP_009158499.1	0	0	0	0	0.089	0.691	0.468	0.809	0.967
XP_009157410.1	XP_009153283.1	2644801	2640819	5970.XP_009157410.1	5970.XP_009153283.1	0	0	0	0	0.694	0.246	0.781	0.441	0.967
XP_009153555.1	XP_009153041.1	2641084	2640581	5970.XP_009153555.1	5970.XP_009153041.1	0	0	0	0	0	0.658	0.549	0.808	0.967
XP_009161647.1	XP_009155096.1	2648912	2642592	5970.XP_009161647.1	5970.XP_009155096.1	0	0	0	0	0.043	0.595	0.228	0.9	0.966
XP_009158696.1	XP_009154720.1	2646037	2642220	5970.XP_009158696.1	5970.XP_009154720.1	0	0	0	0	0.658	0.243	0.781	0.478	0.966
XP_009159812.1	XP_009157498.1	2647133	2644879	5970.XP_009159812.1	5970.XP_009157498.1	0	0	0	0	0.043	0.687	0.605	0.75	0.966
XP_009155917.1	XP_009154187.1	2643380	2641700	5970.XP_009155917.1	5970.XP_009154187.1	0	0	0	0	0.619	0.281	0.401	0.818	0.966
XP_009159646.1	XP_009155515.1	2646972	2643000	5970.XP_009159646.1	5970.XP_009155515.1	0	0	0	0	0.042	0	0.781	0.854	0.966
XP_009160986.1	XP_009158696.1	2648271	2646037	5970.XP_009160986.1	5970.XP_009158696.1	0	0	0	0	0.628	0.263	0.781	0.501	0.966
XP_009161490.1	XP_009161285.1	2648759	2648558	5970.XP_009161490.1	5970.XP_009161285.1	0	0	0	0	0.731	0.138	0.781	0.417	0.966
XP_009159146.1	XP_009155096.1	2646479	2642592	5970.XP_009159146.1	5970.XP_009155096.1	0	0	0	0	0.049	0.654	0	0.905	0.966
XP_009160977.1	XP_009153277.1	2648262	2640813	5970.XP_009160977.1	5970.XP_009153277.1	0	0	0	0	0.121	0.794	0.274	0.772	0.966
XP_009157295.1	XP_009154991.1	2644688	2642488	5970.XP_009157295.1	5970.XP_009154991.1	0	0	0	0	0.045	0.073	0.95	0.31	0.965
XP_009160031.1	XP_009158499.1	2647346	2645846	5970.XP_009160031.1	5970.XP_009158499.1	0	0	0	0	0	0.688	0.468	0.809	0.965
XP_009158696.1	XP_009156318.1	2646037	2643763	5970.XP_009158696.1	5970.XP_009156318.1	0.101	0	0	0	0.192	0.525	0.548	0.812	0.965
XP_009154187.1	XP_009153464.1	2641700	2640994	5970.XP_009154187.1	5970.XP_009153464.1	0	0	0	0	0.215	0.079	0.781	0.809	0.965
XP_009159646.1	XP_009158757.1	2646972	2646098	5970.XP_009159646.1	5970.XP_009158757.1	0	0	0	0	0.104	0.615	0	0.908	0.965
XP_009158696.1	XP_009155741.1	2646037	2643213	5970.XP_009158696.1	5970.XP_009155741.1	0	0	0	0	0.097	0.906	0.528	0.237	0.965
XP_009159215.1	XP_009156318.1	2646547	2643763	5970.XP_009159215.1	5970.XP_009156318.1	0.067	0	0	0	0.421	0.299	0.544	0.831	0.965
XP_009160480.1	XP_009156183.1	2647784	2643637	5970.XP_009160480.1	5970.XP_009156183.1	0	0	0	0	0.913	0.084	0	0.604	0.965
XP_009160450.1	XP_009158281.1	2647754	2645634	5970.XP_009160450.1	5970.XP_009158281.1	0	0	0	0	0.95	0	0	0.311	0.964
XP_009160586.1	XP_009154887.1	2647887	2642385	5970.XP_009160586.1	5970.XP_009154887.1	0	0	0	0	0.589	0.13	0.781	0.604	0.964
XP_009160602.1	XP_009152651.1	2647903	2640195	5970.XP_009160602.1	5970.XP_009152651.1	0	0	0	0	0	0.28	0.605	0.884	0.964
XP_009160586.1	XP_009158281.1	2647887	2645634	5970.XP_009160586.1	5970.XP_009158281.1	0	0	0.327	0	0.939	0	0	0.194	0.964
XP_009161285.1	XP_009154628.1	2648558	2642132	5970.XP_009161285.1	5970.XP_009154628.1	0.059	0	0.318	0	0.726	0.264	0	0.77	0.964
XP_009159742.1	XP_009159215.1	2647063	2646547	5970.XP_009159742.1	5970.XP_009159215.1	0.042	0	0	0	0.196	0.534	0.539	0.817	0.964
XP_009157728.1	XP_009157220.1	2645101	2644616	5970.XP_009157728.1	5970.XP_009157220.1	0	0	0	0	0.167	0.481	0.605	0.816	0.964
XP_009161466.1	XP_009161299.1	2648735	2648572	5970.XP_009161466.1	5970.XP_009161299.1	0	0	0	0	0.423	0.689	0	0.812	0.963
XP_009158455.1	XP_009152652.1	2645802	2640196	5970.XP_009158455.1	5970.XP_009152652.1	0.064	0	0	0	0.143	0.279	0.448	0.903	0.963
XP_009157056.1	XP_009152628.1	2644461	2640173	5970.XP_009157056.1	5970.XP_009152628.1	0	0	0	0	0.066	0.284	0.781	0.772	0.962
XP_009160480.1	XP_009153464.1	2647784	2640994	5970.XP_009160480.1	5970.XP_009153464.1	0	0	0	0	0.626	0.071	0.781	0.56	0.962
XP_009160063.1	XP_009155218.1	2647377	2642712	5970.XP_009160063.1	5970.XP_009155218.1	0	0	0	0	0.07	0.813	0.781	0.139	0.962
XP_009154537.1	XP_009152327.1	2642043	2639879	5970.XP_009154537.1	5970.XP_009152327.1	0	0	0	0	0.093	0.278	0.549	0.888	0.962
XP_009159242.1	XP_009154991.1	2646574	2642488	5970.XP_009159242.1	5970.XP_009154991.1	0	0	0	0	0.104	0.282	0.923	0.326	0.962
XP_009155867.1	XP_009153893.1	2643334	2641415	5970.XP_009155867.1	5970.XP_009153893.1	0.049	0	0	0.616	0	0.291	0.93	0.695	0.962
XP_009159812.1	XP_009152414.1	2647133	2639966	5970.XP_009159812.1	5970.XP_009152414.1	0	0	0	0	0.052	0.908	0.227	0.502	0.961
XP_009160586.1	XP_009153296.1	2647887	2640832	5970.XP_009160586.1	5970.XP_009153296.1	0	0	0	0	0.681	0.13	0.549	0.732	0.961
XP_009158281.1	XP_009153296.1	2645634	2640832	5970.XP_009158281.1	5970.XP_009153296.1	0	0	0	0	0.829	0.279	0.09	0.694	0.961
XP_009160063.1	XP_009154311.1	2647377	2641821	5970.XP_009160063.1	5970.XP_009154311.1	0	0	0	0	0	0.907	0.448	0.311	0.961
XP_009160480.1	XP_009153283.1	2647784	2640819	5970.XP_009160480.1	5970.XP_009153283.1	0	0	0	0	0.227	0.196	0.781	0.748	0.961
XP_009160395.1	XP_009158757.1	2647700	2646098	5970.XP_009160395.1	5970.XP_009158757.1	0	0	0	0	0.126	0.565	0	0.908	0.961
XP_009158873.1	XP_009158499.1	2646212	2645846	5970.XP_009158873.1	5970.XP_009158499.1	0	0	0	0	0	0.651	0.468	0.811	0.961
XP_009158907.1	XP_009155917.1	2646246	2643380	5970.XP_009158907.1	5970.XP_009155917.1	0	0	0	0	0.197	0.273	0.401	0.901	0.96
XP_009161490.1	XP_009152662.1	2648759	2640206	5970.XP_009161490.1	5970.XP_009152662.1	0	0	0	0	0.731	0.138	0.781	0.311	0.96
XP_009153720.1	XP_009153566.1	2641243	2641095	5970.XP_009153720.1	5970.XP_009153566.1	0	0	0	0	0.047	0.512	0.247	0.901	0.96
XP_009160586.1	XP_009154720.1	2647887	2642220	5970.XP_009160586.1	5970.XP_009154720.1	0	0	0	0	0.614	0.273	0.781	0.43	0.96
XP_009157410.1	XP_009155324.1	2644801	2642815	5970.XP_009157410.1	5970.XP_009155324.1	0	0	0	0	0.731	0.281	0.401	0.703	0.96
XP_009160063.1	XP_009153720.1	2647377	2641243	5970.XP_009160063.1	5970.XP_009153720.1	0	0	0	0	0	0.692	0.781	0.456	0.96
XP_009161647.1	XP_009155741.1	2648912	2643213	5970.XP_009161647.1	5970.XP_009155741.1	0	0	0	0	0.048	0.657	0.448	0.809	0.96
XP_009160450.1	XP_009154668.1	2647754	2642169	5970.XP_009160450.1	5970.XP_009154668.1	0	0	0	0	0.951	0	0	0.233	0.96
XP_009158696.1	XP_009154628.1	2646037	2642132	5970.XP_009158696.1	5970.XP_009154628.1	0	0	0	0	0.588	0.243	0.781	0.477	0.959
XP_009157485.1	XP_009153555.1	2644868	2641084	5970.XP_009157485.1	5970.XP_009153555.1	0	0	0	0	0.18	0.584	0.549	0.767	0.959
XP_009161299.1	XP_009160480.1	2648572	2647784	5970.XP_009161299.1	5970.XP_009160480.1	0	0	0	0	0.813	0.278	0	0.722	0.959
XP_009160480.1	XP_009154720.1	2647784	2642220	5970.XP_009160480.1	5970.XP_009154720.1	0	0	0	0	0.647	0.179	0.781	0.438	0.959
XP_009159520.1	XP_009154914.1	2646848	2642411	5970.XP_009159520.1	5970.XP_009154914.1	0	0	0	0	0.186	0.138	0.781	0.761	0.958
XP_009155515.1	XP_009155049.1	2643000	2642546	5970.XP_009155515.1	5970.XP_009155049.1	0	0	0	0	0.044	0.07	0.781	0.814	0.958
XP_009161490.1	XP_009161466.1	2648759	2648735	5970.XP_009161490.1	5970.XP_009161466.1	0	0	0	0	0.546	0.265	0.781	0.497	0.958
XP_009155917.1	XP_009154887.1	2643380	2642385	5970.XP_009155917.1	5970.XP_009154887.1	0	0	0	0	0.659	0.278	0	0.842	0.957
XP_009155640.1	XP_009154761.1	2643119	2642260	5970.XP_009155640.1	5970.XP_009154761.1	0	0	0	0	0	0	0.781	0.808	0.956
XP_009159215.1	XP_009152652.1	2646547	2640196	5970.XP_009159215.1	5970.XP_009152652.1	0.052	0	0	0	0.098	0.346	0.443	0.883	0.956
XP_009160986.1	XP_009154720.1	2648271	2642220	5970.XP_009160986.1	5970.XP_009154720.1	0	0	0	0	0.683	0.12	0.781	0.365	0.956
XP_009161466.1	XP_009159215.1	2648735	2646547	5970.XP_009161466.1	5970.XP_009159215.1	0	0	0	0	0.442	0.596	0.702	0.424	0.956
XP_009159541.1	XP_009155324.1	2646869	2642815	5970.XP_009159541.1	5970.XP_009155324.1	0	0	0	0	0.611	0.083	0.438	0.81	0.956
XP_009160586.1	XP_009158696.1	2647887	2646037	5970.XP_009160586.1	5970.XP_009158696.1	0	0	0	0	0.612	0.108	0.781	0.483	0.955
XP_009159742.1	XP_009156701.1	2647063	2644119	5970.XP_009159742.1	5970.XP_009156701.1	0	0	0	0	0.096	0.577	0.494	0.795	0.955
XP_009153612.1	XP_009153041.1	2641139	2640581	5970.XP_009153612.1	5970.XP_009153041.1	0	0	0	0	0.046	0.489	0.549	0.82	0.955
XP_009161466.1	XP_009153581.1	2648735	2641110	5970.XP_009161466.1	5970.XP_009153581.1	0	0	0	0	0	0.129	0.951	0	0.955
XP_009161466.1	XP_009160629.1	2648735	2647929	5970.XP_009161466.1	5970.XP_009160629.1	0	0	0	0	0	0.129	0.951	0	0.955
XP_009159742.1	XP_009156318.1	2647063	2643763	5970.XP_009159742.1	5970.XP_009156318.1	0.183	0	0	0	0.16	0.422	0.472	0.822	0.955
XP_009160536.1	XP_009152260.1	2647837	2639816	5970.XP_009160536.1	5970.XP_009152260.1	0.069	0	0	0	0	0	0.951	0.107	0.955
XP_009157528.1	XP_009156884.1	2644907	2644295	5970.XP_009157528.1	5970.XP_009156884.1	0	0	0	0	0.206	0.577	0.547	0.742	0.955
XP_009161518.1	XP_009153296.1	2648787	2640832	5970.XP_009161518.1	5970.XP_009153296.1	0	0	0	0	0.85	0.268	0.09	0.603	0.955
XP_009155949.1	XP_009155610.1	2643412	2643089	5970.XP_009155949.1	5970.XP_009155610.1	0	0	0	0	0.044	0.596	0.549	0.773	0.955
XP_009158696.1	XP_009154887.1	2646037	2642385	5970.XP_009158696.1	5970.XP_009154887.1	0	0	0	0	0.577	0.272	0.781	0.405	0.954
XP_009157345.1	XP_009154991.1	2644738	2642488	5970.XP_009157345.1	5970.XP_009154991.1	0	0	0	0	0.081	0.072	0.946	0.126	0.954
XP_009161299.1	XP_009155917.1	2648572	2643380	5970.XP_009161299.1	5970.XP_009155917.1	0	0	0	0	0.673	0.242	0	0.831	0.954
XP_009160986.1	XP_009155324.1	2648271	2642815	5970.XP_009160986.1	5970.XP_009155324.1	0	0	0	0	0.857	0.117	0	0.667	0.954
XP_009160484.1	XP_009154991.1	2647788	2642488	5970.XP_009160484.1	5970.XP_009154991.1	0	0	0	0	0.081	0.072	0.946	0.126	0.954
XP_009160520.1	XP_009159812.1	2647821	2647133	5970.XP_009160520.1	5970.XP_009159812.1	0	0	0	0	0.048	0.565	0.401	0.835	0.953
XP_009157483.1	XP_009153328.1	2644866	2640863	5970.XP_009157483.1	5970.XP_009153328.1	0	0	0	0	0.144	0.691	0.201	0.808	0.953
XP_009160590.1	XP_009159146.1	2647891	2646479	5970.XP_009160590.1	5970.XP_009159146.1	0.057	0	0	0	0.188	0.506	0	0.892	0.953
XP_009157671.1	XP_009156318.1	2645047	2643763	5970.XP_009157671.1	5970.XP_009156318.1	0	0	0	0	0.19	0.668	0	0.837	0.952
XP_009155218.1	XP_009152414.1	2642712	2639966	5970.XP_009155218.1	5970.XP_009152414.1	0	0	0	0	0.042	0.686	0.23	0.818	0.952
XP_009161518.1	XP_009160986.1	2648787	2648271	5970.XP_009161518.1	5970.XP_009160986.1	0	0	0	0	0.758	0.085	0.781	0.144	0.952
XP_009160063.1	XP_009153536.1	2647377	2641066	5970.XP_009160063.1	5970.XP_009153536.1	0	0	0	0	0.043	0.687	0.781	0.35	0.951
XP_009154761.1	XP_009153283.1	2642260	2640819	5970.XP_009154761.1	5970.XP_009153283.1	0	0	0	0	0	0.264	0.781	0.721	0.951
XP_009154887.1	XP_009153013.1	2642385	2640553	5970.XP_009154887.1	5970.XP_009153013.1	0	0	0	0	0.663	0.302	0	0.81	0.951
XP_009160977.1	XP_009154930.1	2648262	2642427	5970.XP_009160977.1	5970.XP_009154930.1	0	0	0	0	0.046	0.691	0	0.849	0.951
XP_009159612.1	XP_009155891.1	2646939	2643356	5970.XP_009159612.1	5970.XP_009155891.1	0	0	0	0	0.062	0.172	0.781	0.746	0.951
XP_009160842.1	XP_009155823.1	2648136	2643292	5970.XP_009160842.1	5970.XP_009155823.1	0	0	0	0	0.071	0.602	0.781	0.459	0.95
XP_009160395.1	XP_009155930.1	2647700	2643393	5970.XP_009160395.1	5970.XP_009155930.1	0	0	0	0	0	0.111	0.449	0.908	0.95
XP_009161518.1	XP_009159541.1	2648787	2646869	5970.XP_009161518.1	5970.XP_009159541.1	0	0	0	0	0.613	0.69	0.305	0.476	0.95
XP_009161299.1	XP_009154887.1	2648572	2642385	5970.XP_009161299.1	5970.XP_009154887.1	0	0	0	0	0.654	0.691	0	0.571	0.95
XP_009158589.1	XP_009158274.1	2645936	2645627	5970.XP_009158589.1	5970.XP_009158274.1	0	0	0	0	0.073	0.278	0.781	0.703	0.95
XP_009155324.1	XP_009153589.1	2642815	2641118	5970.XP_009155324.1	5970.XP_009153589.1	0	0	0	0	0.849	0.118	0	0.659	0.95
XP_009160586.1	XP_009154628.1	2647887	2642132	5970.XP_009160586.1	5970.XP_009154628.1	0	0	0.271	0	0.586	0.273	0.781	0.107	0.949
XP_009159064.1	XP_009158696.1	2646401	2646037	5970.XP_009159064.1	5970.XP_009158696.1	0	0	0	0	0.735	0.454	0.549	0.313	0.949
XP_009161466.1	XP_009154187.1	2648735	2641700	5970.XP_009161466.1	5970.XP_009154187.1	0	0	0	0	0.666	0.617	0	0.636	0.949
XP_009160063.1	XP_009155610.1	2647377	2643089	5970.XP_009160063.1	5970.XP_009155610.1	0	0	0	0	0.049	0.908	0.469	0	0.949
XP_009157683.1	XP_009155930.1	2645058	2643393	5970.XP_009157683.1	5970.XP_009155930.1	0	0	0	0	0.049	0.686	0.197	0.809	0.948
XP_009153296.1	XP_009153283.1	2640832	2640819	5970.XP_009153296.1	5970.XP_009153283.1	0	0	0	0	0.236	0.521	0.781	0.437	0.948
XP_009158884.1	XP_009158484.1	2646223	2645831	5970.XP_009158884.1	5970.XP_009158484.1	0	0	0	0	0.625	0	0.201	0.843	0.948
XP_009161285.1	XP_009154720.1	2648558	2642220	5970.XP_009161285.1	5970.XP_009154720.1	0.059	0	0.279	0	0.773	0.482	0	0.458	0.948
XP_009158696.1	XP_009152340.1	2646037	2639892	5970.XP_009158696.1	5970.XP_009152340.1	0	0	0	0	0.662	0.072	0.781	0.33	0.947
XP_009160031.1	XP_009153052.1	2647346	2640592	5970.XP_009160031.1	5970.XP_009153052.1	0	0	0	0	0.654	0.283	0.476	0.646	0.947
XP_009158281.1	XP_009154720.1	2645634	2642220	5970.XP_009158281.1	5970.XP_009154720.1	0.059	0	0.373	0	0.715	0.264	0.305	0.502	0.947
XP_009160986.1	XP_009154628.1	2648271	2642132	5970.XP_009160986.1	5970.XP_009154628.1	0	0	0	0	0.718	0.12	0.781	0.155	0.947
XP_009154628.1	XP_009153589.1	2642132	2641118	5970.XP_009154628.1	5970.XP_009153589.1	0	0	0	0	0.658	0.307	0.781	0.087	0.946
XP_009157112.1	XP_009155218.1	2644516	2642712	5970.XP_009157112.1	5970.XP_009155218.1	0	0	0	0	0.049	0.565	0.401	0.81	0.946
XP_009156884.1	XP_009156318.1	2644295	2643763	5970.XP_009156884.1	5970.XP_009156318.1	0.183	0	0	0	0.104	0.58	0.544	0.68	0.946
XP_009160586.1	XP_009154668.1	2647887	2642169	5970.XP_009160586.1	5970.XP_009154668.1	0	0	0.268	0	0.92	0	0	0.157	0.946
XP_009160863.1	XP_009158757.1	2648156	2646098	5970.XP_009160863.1	5970.XP_009158757.1	0	0	0	0	0.502	0	0	0.896	0.945
XP_009161490.1	XP_009155324.1	2648759	2642815	5970.XP_009161490.1	5970.XP_009155324.1	0	0	0	0	0.814	0.13	0	0.692	0.945
XP_009154887.1	XP_009153283.1	2642385	2640819	5970.XP_009154887.1	5970.XP_009153283.1	0	0	0	0	0.144	0.196	0.781	0.682	0.945
XP_009161638.1	XP_009154145.1	2648903	2641659	5970.XP_009161638.1	5970.XP_009154145.1	0	0	0.478	0.756	0.099	0	0.93	0.307	0.945
XP_009160450.1	XP_009156183.1	2647754	2643637	5970.XP_009160450.1	5970.XP_009156183.1	0.232	0	0	0	0.846	0	0	0.577	0.945
XP_009160520.1	XP_009155218.1	2647821	2642712	5970.XP_009160520.1	5970.XP_009155218.1	0	0	0	0	0	0.565	0.401	0.809	0.945
XP_009154720.1	XP_009153283.1	2642220	2640819	5970.XP_009154720.1	5970.XP_009153283.1	0	0	0	0	0.559	0.136	0.781	0.426	0.945
XP_009156183.1	XP_009153589.1	2643637	2641118	5970.XP_009156183.1	5970.XP_009153589.1	0	0	0	0	0.886	0	0	0.539	0.945
XP_009160590.1	XP_009156648.1	2647891	2644070	5970.XP_009160590.1	5970.XP_009156648.1	0	0	0	0	0.048	0.28	0.781	0.679	0.945
XP_009160063.1	XP_009158274.1	2647377	2645627	5970.XP_009160063.1	5970.XP_009158274.1	0	0	0	0	0.045	0.564	0.781	0.477	0.945
XP_009159812.1	XP_009153328.1	2647133	2640863	5970.XP_009159812.1	5970.XP_009153328.1	0	0	0	0	0.85	0.162	0.446	0.311	0.945
XP_009157410.1	XP_009154628.1	2644801	2642132	5970.XP_009157410.1	5970.XP_009154628.1	0.059	0	0.255	0	0.663	0.264	0	0.734	0.945
XP_009160986.1	XP_009157410.1	2648271	2644801	5970.XP_009160986.1	5970.XP_009157410.1	0	0	0	0	0.728	0.073	0.781	0.136	0.945
XP_009155741.1	XP_009153283.1	2643213	2640819	5970.XP_009155741.1	5970.XP_009153283.1	0	0	0	0	0.044	0.875	0.528	0.131	0.944
XP_009161285.1	XP_009153296.1	2648558	2640832	5970.XP_009161285.1	5970.XP_009153296.1	0	0	0	0	0.852	0.53	0.09	0.233	0.944
XP_009161466.1	XP_009152652.1	2648735	2640196	5970.XP_009161466.1	5970.XP_009152652.1	0.048	0	0	0	0.179	0.663	0.443	0.68	0.944
XP_009160063.1	XP_009153328.1	2647377	2640863	5970.XP_009160063.1	5970.XP_009153328.1	0	0	0	0	0.049	0.692	0.781	0.232	0.944
XP_009156884.1	XP_009156701.1	2644295	2644119	5970.XP_009156884.1	5970.XP_009156701.1	0	0	0	0	0.2	0.577	0.547	0.681	0.944
XP_009157910.1	XP_009156495.1	2645273	2643930	5970.XP_009157910.1	5970.XP_009156495.1	0	0	0	0	0	0	0.93	0.233	0.944
XP_009161490.1	XP_009154720.1	2648759	2642220	5970.XP_009161490.1	5970.XP_009154720.1	0	0	0	0	0.648	0.074	0.781	0.297	0.943
XP_009161466.1	XP_009156648.1	2648735	2644070	5970.XP_009161466.1	5970.XP_009156648.1	0	0	0	0	0.334	0.485	0.781	0.338	0.943
XP_009160480.1	XP_009159779.1	2647784	2647100	5970.XP_009160480.1	5970.XP_009159779.1	0	0	0	0	0.647	0.084	0.549	0.656	0.943
XP_009158696.1	XP_009154761.1	2646037	2642260	5970.XP_009158696.1	5970.XP_009154761.1	0	0	0	0	0.043	0.137	0.781	0.725	0.943
XP_009159765.1	XP_009157418.1	2647086	2644807	5970.XP_009159765.1	5970.XP_009157418.1	0	0	0	0	0.089	0.31	0.499	0.838	0.942
XP_009160629.1	XP_009160063.1	2647929	2647377	5970.XP_009160629.1	5970.XP_009160063.1	0	0	0	0	0	0.691	0.549	0.623	0.942
XP_009160590.1	XP_009156701.1	2647891	2644119	5970.XP_009160590.1	5970.XP_009156701.1	0	0	0	0	0.049	0.687	0	0.823	0.942
XP_009154299.1	XP_009153575.1	2641809	2641104	5970.XP_009154299.1	5970.XP_009153575.1	0	0	0	0	0.093	0.283	0.702	0.733	0.941
XP_009161285.1	XP_009159541.1	2648558	2646869	5970.XP_009161285.1	5970.XP_009159541.1	0	0	0	0	0.63	0.69	0.305	0.356	0.941
XP_009155867.1	XP_009152351.1	2643334	2639903	5970.XP_009155867.1	5970.XP_009152351.1	0	0	0.479	0.878	0	0	0.938	0	0.941
XP_009160590.1	XP_009159754.1	2647891	2647075	5970.XP_009160590.1	5970.XP_009159754.1	0	0	0	0	0.13	0.278	0.544	0.82	0.941
XP_009161638.1	XP_009158537.1	2648903	2645884	5970.XP_009161638.1	5970.XP_009158537.1	0.054	0	0	0	0.126	0	0.93	0.108	0.941
XP_009153464.1	XP_009153283.1	2640994	2640819	5970.XP_009153464.1	5970.XP_009153283.1	0	0	0	0	0.223	0.686	0.781	0	0.941
XP_009158907.1	XP_009154187.1	2646246	2641700	5970.XP_009158907.1	5970.XP_009154187.1	0	0	0	0	0.102	0.485	0.401	0.81	0.94
XP_009160731.1	XP_009154744.1	2648028	2642243	5970.XP_009160731.1	5970.XP_009154744.1	0	0	0	0	0.181	0.794	0.549	0.311	0.94
XP_009154668.1	XP_009153125.1	2642169	2640663	5970.XP_009154668.1	5970.XP_009153125.1	0	0	0	0	0.919	0	0	0.29	0.94
XP_009159541.1	XP_009152662.1	2646869	2640206	5970.XP_009159541.1	5970.XP_009152662.1	0	0	0	0	0.617	0.691	0.305	0.367	0.94
XP_009161490.1	XP_009158696.1	2648759	2646037	5970.XP_009161490.1	5970.XP_009158696.1	0	0	0	0	0.617	0.269	0.781	0.129	0.939
XP_009159765.1	XP_009157056.1	2647086	2644461	5970.XP_009159765.1	5970.XP_009157056.1	0	0	0	0	0	0.277	0.903	0.213	0.939
XP_009161466.1	XP_009158650.1	2648735	2645991	5970.XP_009161466.1	5970.XP_009158650.1	0	0	0	0	0.596	0.307	0.419	0.674	0.939
XP_009160480.1	XP_009154628.1	2647784	2642132	5970.XP_009160480.1	5970.XP_009154628.1	0	0	0	0	0.611	0.179	0.781	0.232	0.939
XP_009160484.1	XP_009152651.1	2647788	2640195	5970.XP_009160484.1	5970.XP_009152651.1	0	0	0	0	0.043	0.531	0	0.877	0.939
XP_009159646.1	XP_009152327.1	2646972	2639879	5970.XP_009159646.1	5970.XP_009152327.1	0	0	0	0	0.12	0.305	0	0.907	0.938
XP_009155917.1	XP_009153283.1	2643380	2640819	5970.XP_009155917.1	5970.XP_009153283.1	0	0	0	0	0.051	0.843	0.466	0.311	0.937
XP_009160063.1	XP_009152574.1	2647377	2640120	5970.XP_009160063.1	5970.XP_009152574.1	0	0	0	0	0.057	0.689	0.781	0.142	0.937
XP_009157683.1	XP_009153328.1	2645058	2640863	5970.XP_009157683.1	5970.XP_009153328.1	0	0	0	0	0.089	0.687	0.201	0.759	0.937
XP_009153893.1	XP_009152351.1	2641415	2639903	5970.XP_009153893.1	5970.XP_009152351.1	0.049	0	0	0.573	0	0.171	0.925	0.108	0.937
XP_009160063.1	XP_009155823.1	2647377	2643292	5970.XP_009160063.1	5970.XP_009155823.1	0	0	0	0	0.079	0.679	0.781	0.133	0.936
XP_009160132.1	XP_009157056.1	2647446	2644461	5970.XP_009160132.1	5970.XP_009157056.1	0	0	0	0	0.044	0.276	0.227	0.896	0.936
XP_009157295.1	XP_009153236.1	2644688	2640773	5970.XP_009157295.1	5970.XP_009153236.1	0	0	0	0	0.048	0	0.781	0.719	0.936
XP_009159754.1	XP_009159215.1	2647075	2646547	5970.XP_009159754.1	5970.XP_009159215.1	0	0	0	0	0.366	0.084	0.544	0.788	0.936
XP_009160590.1	XP_009157528.1	2647891	2644907	5970.XP_009160590.1	5970.XP_009157528.1	0	0	0	0	0.053	0.647	0	0.826	0.936
XP_009159025.1	XP_009156293.1	2646363	2643742	5970.XP_009159025.1	5970.XP_009156293.1	0	0	0	0	0	0.565	0	0.859	0.936
XP_009154930.1	XP_009153277.1	2642427	2640813	5970.XP_009154930.1	5970.XP_009153277.1	0	0	0	0	0	0.593	0.05	0.847	0.935
XP_009154668.1	XP_009153296.1	2642169	2640832	5970.XP_009154668.1	5970.XP_009153296.1	0	0	0	0	0.852	0.268	0.09	0.426	0.935
XP_009157056.1	XP_009153315.1	2644461	2640851	5970.XP_009157056.1	5970.XP_009153315.1	0	0	0	0.877	0.048	0.686	0.781	0.821	0.935
XP_009160590.1	XP_009157792.1	2647891	2645163	5970.XP_009160590.1	5970.XP_009157792.1	0	0	0.479	0.823	0	0	0.93	0	0.935
XP_009159356.1	XP_009153236.1	2646687	2640773	5970.XP_009159356.1	5970.XP_009153236.1	0.048	0	0	0	0.086	0.687	0.549	0.557	0.935
XP_009154187.1	XP_009153283.1	2641700	2640819	5970.XP_009154187.1	5970.XP_009153283.1	0	0	0	0	0.232	0.137	0.781	0.606	0.935
XP_009160395.1	XP_009153236.1	2647700	2640773	5970.XP_009160395.1	5970.XP_009153236.1	0	0	0	0	0.093	0.131	0.781	0.669	0.935
XP_009158650.1	XP_009152327.1	2645991	2639879	5970.XP_009158650.1	5970.XP_009152327.1	0	0	0	0.643	0.061	0.07	0.93	0.124	0.935
XP_009159215.1	XP_009156446.1	2646547	2643883	5970.XP_009159215.1	5970.XP_009156446.1	0.053	0	0	0	0.421	0.454	0.385	0.698	0.934
XP_009161661.1	XP_009153365.1	2648926	2640899	5970.XP_009161661.1	5970.XP_009153365.1	0.046	0	0	0	0.048	0.07	0.93	0.067	0.934
XP_009155049.1	XP_009152540.1	2642546	2640088	5970.XP_009155049.1	5970.XP_009152540.1	0	0	0	0	0	0	0.93	0.101	0.934
XP_009156701.1	XP_009155610.1	2644119	2643089	5970.XP_009156701.1	5970.XP_009155610.1	0	0	0	0	0.085	0.269	0.547	0.808	0.934
XP_009161638.1	XP_009161279.1	2648903	2648552	5970.XP_009161638.1	5970.XP_009161279.1	0	0	0.48	0.938	0.079	0	0.93	0	0.934
XP_009161518.1	XP_009160450.1	2648787	2647754	5970.XP_009161518.1	5970.XP_009160450.1	0	0	0	0	0.89	0	0	0.431	0.934
XP_009156648.1	XP_009155096.1	2644070	2642592	5970.XP_009156648.1	5970.XP_009155096.1	0	0	0	0	0	0.367	0.702	0.679	0.934
XP_009155917.1	XP_009152662.1	2643380	2640206	5970.XP_009155917.1	5970.XP_009152662.1	0	0	0	0	0.657	0.635	0.401	0.233	0.934
XP_009156885.1	XP_009153484.1	2644296	2641014	5970.XP_009156885.1	5970.XP_009153484.1	0.062	0	0	0	0	0	0.93	0.077	0.934
XP_009159215.1	XP_009156445.1	2646547	2643882	5970.XP_009159215.1	5970.XP_009156445.1	0.053	0	0	0	0.421	0.454	0.385	0.698	0.934
XP_009159812.1	XP_009157483.1	2647133	2644866	5970.XP_009159812.1	5970.XP_009157483.1	0	0	0	0	0.05	0.481	0.549	0.738	0.933
XP_009161285.1	XP_009155917.1	2648558	2643380	5970.XP_009161285.1	5970.XP_009155917.1	0	0	0	0	0.727	0.48	0.401	0.31	0.933
XP_009161490.1	XP_009154628.1	2648759	2642132	5970.XP_009161490.1	5970.XP_009154628.1	0	0	0	0	0.619	0.074	0.781	0.239	0.933
XP_009160602.1	XP_009152650.1	2647903	2640194	5970.XP_009160602.1	5970.XP_009152650.1	0	0	0	0	0.043	0	0.605	0.839	0.933
XP_009159541.1	XP_009154187.1	2646869	2641700	5970.XP_009159541.1	5970.XP_009154187.1	0	0	0	0	0.39	0.125	0.447	0.8	0.933
XP_009159812.1	XP_009156094.1	2647133	2643553	5970.XP_009159812.1	5970.XP_009156094.1	0	0	0	0	0.044	0.117	0.605	0.824	0.933
XP_009160820.1	XP_009153893.1	2648114	2641415	5970.XP_009160820.1	5970.XP_009153893.1	0	0	0	0	0	0.565	0.228	0.815	0.932
XP_009160315.1	XP_009156690.1	2647624	2644109	5970.XP_009160315.1	5970.XP_009156690.1	0.043	0	0	0	0	0	0.93	0.07	0.932
XP_009155698.1	XP_009152343.1	2643172	2639895	5970.XP_009155698.1	5970.XP_009152343.1	0	0	0	0	0	0.488	0.468	0.772	0.932
XP_009160536.1	XP_009156690.1	2647837	2644109	5970.XP_009160536.1	5970.XP_009156690.1	0.043	0	0	0	0	0	0.93	0.07	0.932
XP_009157913.1	XP_009152327.1	2645276	2639879	5970.XP_009157913.1	5970.XP_009152327.1	0	0	0	0	0	0.08	0.93	0	0.932
XP_009161647.1	XP_009159146.1	2648912	2646479	5970.XP_009161647.1	5970.XP_009159146.1	0	0	0	0	0.125	0.278	0.069	0.897	0.931
XP_009159064.1	XP_009158281.1	2646401	2645634	5970.XP_009159064.1	5970.XP_009158281.1	0	0	0	0	0.699	0.083	0	0.773	0.931
XP_009157643.1	XP_009155026.1	2645020	2642523	5970.XP_009157643.1	5970.XP_009155026.1	0	0	0	0	0	0	0.926	0.115	0.931
XP_009156884.1	XP_009155096.1	2644295	2642592	5970.XP_009156884.1	5970.XP_009155096.1	0	0	0	0	0.046	0.556	0.544	0.689	0.931
XP_009160315.1	XP_009152260.1	2647624	2639816	5970.XP_009160315.1	5970.XP_009152260.1	0.069	0	0	0	0	0	0.924	0.107	0.931
XP_009161518.1	XP_009155917.1	2648787	2643380	5970.XP_009161518.1	5970.XP_009155917.1	0	0	0	0	0.68	0.282	0.401	0.562	0.931
XP_009161466.1	XP_009156318.1	2648735	2643763	5970.XP_009161466.1	5970.XP_009156318.1	0.111	0	0	0	0.253	0.509	0.544	0.611	0.931
XP_009157410.1	XP_009156183.1	2644801	2643637	5970.XP_009157410.1	5970.XP_009156183.1	0	0	0	0	0.907	0.118	0	0.232	0.931
XP_009154887.1	XP_009152652.1	2642385	2640196	5970.XP_009154887.1	5970.XP_009152652.1	0	0	0	0	0.189	0.59	0	0.808	0.93
XP_009159488.1	XP_009158859.1	2646817	2646199	5970.XP_009159488.1	5970.XP_009158859.1	0	0	0	0	0.047	0	0.93	0.047	0.93
XP_009160518.1	XP_009157358.1	2647819	2644751	5970.XP_009160518.1	5970.XP_009157358.1	0	0	0.478	0.831	0	0	0.925	0	0.93
XP_009160977.1	XP_009154744.1	2648262	2642243	5970.XP_009160977.1	5970.XP_009154744.1	0	0	0	0	0.226	0.535	0.549	0.622	0.93
XP_009161299.1	XP_009154628.1	2648572	2642132	5970.XP_009161299.1	5970.XP_009154628.1	0	0	0	0.568	0.4	0.691	0.463	0.808	0.929
XP_009159425.1	XP_009155218.1	2646755	2642712	5970.XP_009159425.1	5970.XP_009155218.1	0	0	0	0	0.217	0.688	0.364	0.601	0.929
XP_009153013.1	XP_009152652.1	2640553	2640196	5970.XP_009153013.1	5970.XP_009152652.1	0	0	0.464	0.672	0.233	0.69	0.549	0.908	0.929
XP_009160361.1	XP_009153566.1	2647668	2641095	5970.XP_009160361.1	5970.XP_009153566.1	0.049	0	0	0	0.05	0.265	0.061	0.904	0.929
XP_009157066.1	XP_009154299.1	2644471	2641809	5970.XP_009157066.1	5970.XP_009154299.1	0	0	0	0	0.621	0.098	0	0.811	0.929
XP_009158696.1	XP_009153013.1	2646037	2640553	5970.XP_009158696.1	5970.XP_009153013.1	0	0	0	0	0.401	0.323	0.544	0.665	0.929
XP_009160395.1	XP_009152327.1	2647700	2639879	5970.XP_009160395.1	5970.XP_009152327.1	0	0	0	0	0.055	0.284	0	0.904	0.929
XP_009160480.1	XP_009153013.1	2647784	2640553	5970.XP_009160480.1	5970.XP_009153013.1	0	0	0	0	0.732	0.241	0	0.682	0.929
XP_009157056.1	XP_009154444.1	2644461	2641950	5970.XP_009157056.1	5970.XP_009154444.1	0	0	0	0	0	0.265	0.263	0.879	0.928
XP_009161466.1	XP_009153518.1	2648735	2641048	5970.XP_009161466.1	5970.XP_009153518.1	0.15	0	0	0	0.104	0.297	0.781	0.487	0.928
XP_009160553.1	XP_009160395.1	2647854	2647700	5970.XP_009160553.1	5970.XP_009160395.1	0	0	0	0	0.097	0.565	0	0.833	0.928
XP_009158928.1	XP_009156183.1	2646267	2643637	5970.XP_009158928.1	5970.XP_009156183.1	0	0	0	0	0.817	0	0	0.627	0.928
XP_009156981.1	XP_009155922.1	2644391	2643385	5970.XP_009156981.1	5970.XP_009155922.1	0	0	0	0	0	0.848	0.549	0	0.928
XP_009158873.1	XP_009153052.1	2646212	2640592	5970.XP_009158873.1	5970.XP_009153052.1	0	0	0	0	0.48	0.283	0.476	0.673	0.927
XP_009158907.1	XP_009158281.1	2646246	2645634	5970.XP_009158907.1	5970.XP_009158281.1	0	0	0	0	0.103	0.678	0.401	0.631	0.927
XP_009155610.1	XP_009155096.1	2643089	2642592	5970.XP_009155610.1	5970.XP_009155096.1	0	0	0	0	0	0.688	0	0.773	0.926
XP_009154628.1	XP_009153283.1	2642132	2640819	5970.XP_009154628.1	5970.XP_009153283.1	0	0	0	0	0.563	0.156	0.781	0.199	0.926
XP_009159025.1	XP_009155218.1	2646363	2642712	5970.XP_009159025.1	5970.XP_009155218.1	0	0	0	0	0.047	0.621	0	0.81	0.925
XP_009155922.1	XP_009154761.1	2643385	2642260	5970.XP_009155922.1	5970.XP_009154761.1	0	0	0	0	0	0	0.781	0.675	0.925
XP_009160120.1	XP_009156673.1	2647434	2644092	5970.XP_009160120.1	5970.XP_009156673.1	0	0	0	0	0.079	0.606	0	0.81	0.925
XP_009157056.1	XP_009155891.1	2644461	2643356	5970.XP_009157056.1	5970.XP_009155891.1	0	0	0	0	0.048	0.25	0.903	0	0.924
XP_009159488.1	XP_009158828.1	2646817	2646169	5970.XP_009159488.1	5970.XP_009158828.1	0.247	0	0	0	0.243	0	0	0.878	0.924
XP_009155930.1	XP_009154537.1	2643393	2642043	5970.XP_009155930.1	5970.XP_009154537.1	0	0	0	0	0.049	0.073	0.179	0.908	0.924
XP_009154611.1	XP_009152937.1	2642115	2640478	5970.XP_009154611.1	5970.XP_009152937.1	0	0	0	0	0.101	0.602	0	0.805	0.924
XP_009159215.1	XP_009157528.1	2646547	2644907	5970.XP_009159215.1	5970.XP_009157528.1	0	0	0	0	0.082	0.517	0	0.842	0.923
XP_009161490.1	XP_009153283.1	2648759	2640819	5970.XP_009161490.1	5970.XP_009153283.1	0	0	0	0	0.174	0	0.781	0.611	0.923
XP_009157483.1	XP_009154860.1	2644866	2642358	5970.XP_009157483.1	5970.XP_009154860.1	0	0	0	0	0	0.688	0.401	0.623	0.923
XP_009156318.1	XP_009153283.1	2643763	2640819	5970.XP_009156318.1	5970.XP_009153283.1	0	0	0	0	0.185	0.273	0.548	0.744	0.922
XP_009157056.1	XP_009154070.1	2644461	2641588	5970.XP_009157056.1	5970.XP_009154070.1	0	0	0	0	0.05	0.24	0.09	0.896	0.922
XP_009157410.1	XP_009154720.1	2644801	2642220	5970.XP_009157410.1	5970.XP_009154720.1	0.059	0	0.38	0	0.715	0.264	0	0.465	0.922
XP_009160986.1	XP_009153464.1	2648271	2640994	5970.XP_009160986.1	5970.XP_009153464.1	0	0	0	0	0.614	0.079	0.781	0.113	0.921
XP_009157485.1	XP_009153041.1	2644868	2640581	5970.XP_009157485.1	5970.XP_009153041.1	0	0	0	0	0.048	0.492	0.401	0.76	0.921
XP_009159541.1	XP_009157410.1	2646869	2644801	5970.XP_009159541.1	5970.XP_009157410.1	0	0	0	0	0.347	0.645	0.305	0.57	0.921
XP_009160820.1	XP_009155867.1	2648114	2643334	5970.XP_009160820.1	5970.XP_009155867.1	0.051	0	0	0	0.098	0.689	0.253	0.665	0.921
XP_009158873.1	XP_009155949.1	2646212	2643412	5970.XP_009158873.1	5970.XP_009155949.1	0	0	0	0	0.195	0.647	0	0.746	0.921
XP_009160480.1	XP_009155917.1	2647784	2643380	5970.XP_009160480.1	5970.XP_009155917.1	0	0	0	0	0.722	0.263	0	0.648	0.921
XP_009160031.1	XP_009153013.1	2647346	2640553	5970.XP_009160031.1	5970.XP_009153013.1	0	0	0	0	0.654	0.073	0	0.772	0.92
XP_009153720.1	XP_009152618.1	2641243	2640164	5970.XP_009153720.1	5970.XP_009152618.1	0	0	0	0	0.043	0.166	0.781	0.598	0.92
XP_009154720.1	XP_009152340.1	2642220	2639892	5970.XP_009154720.1	5970.XP_009152340.1	0	0	0	0	0.724	0.171	0.549	0.321	0.92
XP_009160063.1	XP_009159051.1	2647377	2646388	5970.XP_009160063.1	5970.XP_009159051.1	0	0	0	0	0.044	0.642	0.781	0.064	0.92
XP_009158907.1	XP_009155324.1	2646246	2642815	5970.XP_009158907.1	5970.XP_009155324.1	0	0	0	0	0.124	0.281	0.401	0.815	0.92
XP_009159215.1	XP_009158696.1	2646547	2646037	5970.XP_009159215.1	5970.XP_009158696.1	0	0	0	0	0.196	0.266	0.549	0.737	0.92
XP_009160063.1	XP_009156843.1	2647377	2644254	5970.XP_009160063.1	5970.XP_009156843.1	0	0	0	0	0.078	0.686	0.237	0.679	0.919
XP_009157483.1	XP_009152651.1	2644866	2640195	5970.XP_009157483.1	5970.XP_009152651.1	0	0	0	0	0.044	0.169	0.401	0.85	0.919
XP_009156293.1	XP_009155218.1	2643742	2642712	5970.XP_009156293.1	5970.XP_009155218.1	0	0	0	0	0.119	0.565	0	0.808	0.919
XP_009160361.1	XP_009153636.1	2647668	2641163	5970.XP_009160361.1	5970.XP_009153636.1	0	0	0	0	0	0.692	0.201	0.699	0.919
XP_009157067.1	XP_009155930.1	2644472	2643393	5970.XP_009157067.1	5970.XP_009155930.1	0	0	0	0	0.044	0.143	0	0.908	0.918
XP_009160361.1	XP_009160063.1	2647668	2647377	5970.XP_009160361.1	5970.XP_009160063.1	0	0	0	0	0	0.637	0.781	0.062	0.918
XP_009159942.1	XP_009152401.1	2647259	2639953	5970.XP_009159942.1	5970.XP_009152401.1	0	0	0	0	0.045	0.24	0.401	0.834	0.918
XP_009154720.1	XP_009153296.1	2642220	2640832	5970.XP_009154720.1	5970.XP_009153296.1	0	0	0	0	0.626	0.265	0.549	0.422	0.918
XP_009160586.1	XP_009153283.1	2647887	2640819	5970.XP_009160586.1	5970.XP_009153283.1	0	0	0	0	0.39	0.07	0.781	0.422	0.918
XP_009161490.1	XP_009161299.1	2648759	2648572	5970.XP_009161490.1	5970.XP_009161299.1	0	0	0	0	0.693	0.297	0	0.652	0.918
XP_009160031.1	XP_009156648.1	2647346	2644070	5970.XP_009160031.1	5970.XP_009156648.1	0	0	0	0	0.053	0.266	0.449	0.809	0.917
XP_009160863.1	XP_009155930.1	2648156	2643393	5970.XP_009160863.1	5970.XP_009155930.1	0	0	0	0	0.144	0	0	0.908	0.917
XP_009155515.1	XP_009152327.1	2643000	2639879	5970.XP_009155515.1	5970.XP_009152327.1	0	0	0	0	0.048	0	0.549	0.824	0.917
XP_009157528.1	XP_009155096.1	2644907	2642592	5970.XP_009157528.1	5970.XP_009155096.1	0	0	0	0	0.047	0.273	0	0.891	0.917
XP_009160361.1	XP_009157354.1	2647668	2644747	5970.XP_009160361.1	5970.XP_009157354.1	0	0	0	0.551	0.099	0.69	0.549	0.883	0.917
XP_009160602.1	XP_009155640.1	2647903	2643119	5970.XP_009160602.1	5970.XP_009155640.1	0	0	0	0	0.089	0.128	0.781	0.579	0.916
XP_009157275.1	XP_009153277.1	2644669	2640813	5970.XP_009157275.1	5970.XP_009153277.1	0	0	0	0	0.05	0.565	0.049	0.813	0.916
XP_009160590.1	XP_009159541.1	2647891	2646869	5970.XP_009160590.1	5970.XP_009159541.1	0	0	0	0	0.168	0.566	0.503	0.589	0.916
XP_009154628.1	XP_009152662.1	2642132	2640206	5970.XP_009154628.1	5970.XP_009152662.1	0.059	0	0.316	0	0.728	0.264	0.305	0.233	0.915
XP_009159356.1	XP_009157295.1	2646687	2644688	5970.XP_009159356.1	5970.XP_009157295.1	0	0	0	0	0.142	0.523	0.549	0.598	0.915
XP_009160484.1	XP_009155640.1	2647788	2643119	5970.XP_009160484.1	5970.XP_009155640.1	0.057	0	0	0	0.043	0.07	0.781	0.61	0.915
XP_009159742.1	XP_009155096.1	2647063	2642592	5970.XP_009159742.1	5970.XP_009155096.1	0	0	0	0	0.099	0.265	0.472	0.788	0.915
XP_009160480.1	XP_009159064.1	2647784	2646401	5970.XP_009160480.1	5970.XP_009159064.1	0	0	0	0	0.852	0.241	0	0.312	0.915
XP_009158073.1	XP_009155741.1	2645431	2643213	5970.XP_009158073.1	5970.XP_009155741.1	0	0	0	0	0	0.627	0.468	0.602	0.914
XP_009158055.1	XP_009154866.1	2645413	2642364	5970.XP_009158055.1	5970.XP_009154866.1	0	0	0	0	0.051	0.18	0	0.899	0.914
XP_009158907.1	XP_009154887.1	2646246	2642385	5970.XP_009158907.1	5970.XP_009154887.1	0	0	0	0	0.102	0.282	0	0.877	0.913
XP_009154887.1	XP_009153464.1	2642385	2640994	5970.XP_009154887.1	5970.XP_009153464.1	0	0	0	0	0.577	0.074	0.781	0.108	0.913
XP_009160063.1	XP_009159812.1	2647377	2647133	5970.XP_009160063.1	5970.XP_009159812.1	0	0	0	0	0.069	0.51	0.781	0.233	0.913
XP_009160590.1	XP_009155610.1	2647891	2643089	5970.XP_009160590.1	5970.XP_009155610.1	0	0	0	0	0.05	0.683	0	0.736	0.913
XP_009155930.1	XP_009155515.1	2643393	2643000	5970.XP_009155930.1	5970.XP_009155515.1	0	0	0	0	0.101	0	0	0.908	0.913
XP_009157863.1	XP_009152662.1	2645231	2640206	5970.XP_009157863.1	5970.XP_009152662.1	0	0	0	0	0.723	0.279	0	0.601	0.913
XP_009160395.1	XP_009159464.1	2647700	2646793	5970.XP_009160395.1	5970.XP_009159464.1	0	0	0	0	0	0.565	0	0.808	0.912
XP_009160063.1	XP_009157683.1	2647377	2645058	5970.XP_009160063.1	5970.XP_009157683.1	0	0	0	0	0.047	0.69	0.549	0.424	0.912
XP_009158696.1	XP_009157792.1	2646037	2645163	5970.XP_009158696.1	5970.XP_009157792.1	0	0	0	0	0.077	0.687	0.364	0.582	0.912
XP_009160602.1	XP_009160484.1	2647903	2647788	5970.XP_009160602.1	5970.XP_009160484.1	0	0	0	0	0.089	0.27	0.069	0.875	0.912
XP_009159541.1	XP_009154668.1	2646869	2642169	5970.XP_009159541.1	5970.XP_009154668.1	0	0	0	0	0.661	0.508	0.305	0.337	0.912
XP_009160063.1	XP_009157485.1	2647377	2644868	5970.XP_009160063.1	5970.XP_009157485.1	0	0	0	0	0	0.161	0.781	0.56	0.912
XP_009160520.1	XP_009157112.1	2647821	2644516	5970.XP_009160520.1	5970.XP_009157112.1	0	0	0	0	0	0.215	0.549	0.773	0.912
XP_009160063.1	XP_009159356.1	2647377	2646687	5970.XP_009160063.1	5970.XP_009159356.1	0	0	0	0	0.051	0.688	0.549	0.422	0.912
XP_009153296.1	XP_009152662.1	2640832	2640206	5970.XP_009153296.1	5970.XP_009152662.1	0	0	0	0	0.849	0.268	0.09	0.232	0.912
XP_009160063.1	XP_009156538.1	2647377	2643970	5970.XP_009160063.1	5970.XP_009156538.1	0	0	0	0	0.048	0.906	0	0.086	0.911
XP_009160395.1	XP_009154537.1	2647700	2642043	5970.XP_009160395.1	5970.XP_009154537.1	0	0	0	0	0.159	0	0	0.899	0.911
XP_009157528.1	XP_009157497.1	2644907	2644878	5970.XP_009157528.1	5970.XP_009157497.1	0	0	0	0	0.046	0.668	0	0.743	0.911
XP_009153125.1	XP_009152662.1	2640663	2640206	5970.XP_009153125.1	5970.XP_009152662.1	0	0	0	0	0.852	0	0	0.427	0.911
XP_009159215.1	XP_009156701.1	2646547	2644119	5970.XP_009159215.1	5970.XP_009156701.1	0	0	0	0	0.087	0.482	0	0.827	0.911
XP_009154628.1	XP_009152340.1	2642132	2639892	5970.XP_009154628.1	5970.XP_009152340.1	0	0	0	0	0.708	0.171	0.549	0.286	0.911
XP_009160863.1	XP_009160553.1	2648156	2647854	5970.XP_009160863.1	5970.XP_009160553.1	0	0	0	0	0.047	0.565	0	0.802	0.91
XP_009157295.1	XP_009153555.1	2644688	2641084	5970.XP_009157295.1	5970.XP_009153555.1	0	0	0	0	0.089	0.154	0.549	0.772	0.91
XP_009159742.1	XP_009155610.1	2647063	2643089	5970.XP_009159742.1	5970.XP_009155610.1	0	0	0	0	0.078	0.517	0.539	0.615	0.91
XP_009157483.1	XP_009152650.1	2644866	2640194	5970.XP_009157483.1	5970.XP_009152650.1	0	0	0	0	0.055	0.124	0.401	0.841	0.91
XP_009156318.1	XP_009153720.1	2643763	2641243	5970.XP_009156318.1	5970.XP_009153720.1	0	0	0	0	0.099	0.515	0	0.81	0.909
XP_009157792.1	XP_009155741.1	2645163	2643213	5970.XP_009157792.1	5970.XP_009155741.1	0	0	0	0	0.118	0.644	0.364	0.598	0.908
XP_009158274.1	XP_009153236.1	2645627	2640773	5970.XP_009158274.1	5970.XP_009153236.1	0	0	0	0	0.126	0.158	0.781	0.499	0.908
XP_009159812.1	XP_009152343.1	2647133	2639895	5970.XP_009159812.1	5970.XP_009152343.1	0	0	0	0	0.048	0.691	0.298	0.61	0.908
XP_009155049.1	XP_009154100.1	2642546	2641617	5970.XP_009155049.1	5970.XP_009154100.1	0	0	0	0	0	0	0	0.908	0.908
XP_009159646.1	XP_009155930.1	2646972	2643393	5970.XP_009159646.1	5970.XP_009155930.1	0	0	0	0	0	0	0	0.908	0.908
XP_009161466.1	XP_009153566.1	2648735	2641095	5970.XP_009161466.1	5970.XP_009153566.1	0.088	0	0	0	0.048	0.36	0.247	0.814	0.907
XP_009159337.1	XP_009154470.1	2646668	2641976	5970.XP_009159337.1	5970.XP_009154470.1	0	0	0	0	0.044	0.316	0.468	0.766	0.907
XP_009159520.1	XP_009152872.1	2646848	2640414	5970.XP_009159520.1	5970.XP_009152872.1	0	0	0	0	0.089	0.376	0.464	0.733	0.907
XP_009158682.1	XP_009158484.1	2646023	2645831	5970.XP_009158682.1	5970.XP_009158484.1	0	0	0	0	0.851	0	0	0.406	0.907
XP_009158696.1	XP_009156445.1	2646037	2643882	5970.XP_009158696.1	5970.XP_009156445.1	0	0	0	0	0.062	0.632	0.43	0.579	0.906
XP_009157483.1	XP_009156648.1	2644866	2644070	5970.XP_009157483.1	5970.XP_009156648.1	0	0	0	0	0.131	0.256	0.549	0.716	0.906
XP_009158696.1	XP_009156446.1	2646037	2643883	5970.XP_009158696.1	5970.XP_009156446.1	0	0	0	0	0.062	0.632	0.43	0.579	0.906
XP_009158928.1	XP_009153464.1	2646267	2640994	5970.XP_009158928.1	5970.XP_009153464.1	0	0	0	0	0.579	0	0.781	0.068	0.906
XP_009161299.1	XP_009159541.1	2648572	2646869	5970.XP_009161299.1	5970.XP_009159541.1	0	0	0	0	0.388	0.277	0	0.803	0.905
XP_009160630.1	XP_009160629.1	2647930	2647929	5970.XP_009160630.1	5970.XP_009160629.1	0	0	0	0	0.053	0.302	0.549	0.72	0.905
XP_009157485.1	XP_009153236.1	2644868	2640773	5970.XP_009157485.1	5970.XP_009153236.1	0	0	0	0	0.05	0.127	0.781	0.541	0.905
XP_009160586.1	XP_009160480.1	2647887	2647784	5970.XP_009160586.1	5970.XP_009160480.1	0	0	0	0	0.594	0.14	0.098	0.734	0.905
XP_009158928.1	XP_009155100.1	2646267	2642596	5970.XP_009158928.1	5970.XP_009155100.1	0	0	0	0	0.151	0	0.468	0.808	0.905
XP_009156318.1	XP_009153518.1	2643763	2641048	5970.XP_009156318.1	5970.XP_009153518.1	0.074	0	0	0	0.103	0.275	0.305	0.809	0.905
XP_009158859.1	XP_009157780.1	2646199	2645151	5970.XP_009158859.1	5970.XP_009157780.1	0	0	0	0	0.043	0	0.905	0	0.905
XP_009154887.1	XP_009154628.1	2642385	2642132	5970.XP_009154887.1	5970.XP_009154628.1	0	0	0	0	0.475	0.179	0.781	0.115	0.905
XP_009154761.1	XP_009152651.1	2642260	2640195	5970.XP_009154761.1	5970.XP_009152651.1	0	0	0	0	0	0.118	0.426	0.826	0.904
XP_009155324.1	XP_009153296.1	2642815	2640832	5970.XP_009155324.1	5970.XP_009153296.1	0	0	0	0	0.702	0.3	0	0.579	0.904
XP_009157483.1	XP_009155640.1	2644866	2643119	5970.XP_009157483.1	5970.XP_009155640.1	0	0	0	0	0.052	0.277	0.781	0.44	0.904
XP_009157792.1	XP_009153518.1	2645163	2641048	5970.XP_009157792.1	5970.XP_009153518.1	0.049	0	0	0	0.125	0.662	0.273	0.599	0.903
XP_009159038.1	XP_009158669.1	2646376	2646010	5970.XP_009159038.1	5970.XP_009158669.1	0	0	0	0	0.043	0.608	0.549	0.495	0.903
XP_009158547.1	XP_009153720.1	2645894	2641243	5970.XP_009158547.1	5970.XP_009153720.1	0	0	0	0	0.184	0.686	0	0.653	0.903
XP_009159665.1	XP_009155891.1	2646990	2643356	5970.XP_009159665.1	5970.XP_009155891.1	0	0	0	0	0.046	0.58	0.468	0.6	0.903
XP_009158859.1	XP_009154296.1	2646199	2641806	5970.XP_009158859.1	5970.XP_009154296.1	0.055	0	0	0	0	0	0.895	0.094	0.902
XP_009155515.1	XP_009152401.1	2643000	2639953	5970.XP_009155515.1	5970.XP_009152401.1	0	0	0	0	0.203	0	0.605	0.716	0.902
XP_009153296.1	XP_009152652.1	2640832	2640196	5970.XP_009153296.1	5970.XP_009152652.1	0	0	0	0	0.231	0.241	0.23	0.808	0.902
XP_009159215.1	XP_009153283.1	2646547	2640819	5970.XP_009159215.1	5970.XP_009153283.1	0	0	0	0	0.177	0.116	0.549	0.736	0.901
XP_009159779.1	XP_009153283.1	2647100	2640819	5970.XP_009159779.1	5970.XP_009153283.1	0	0	0	0	0.201	0.684	0.549	0.237	0.901
XP_009161285.1	XP_009152340.1	2648558	2639892	5970.XP_009161285.1	5970.XP_009152340.1	0	0	0	0	0.665	0.138	0.057	0.68	0.901
XP_009160063.1	XP_009153958.1	2647377	2641478	5970.XP_009160063.1	5970.XP_009153958.1	0	0	0	0	0.179	0.369	0.781	0.234	0.901
XP_009161466.1	XP_009158455.1	2648735	2645802	5970.XP_009161466.1	5970.XP_009158455.1	0.15	0	0	0	0.079	0.297	0.781	0.31	0.901

## Sheet: Alpha String Annotations
#node	identifier	domain_summary_url	annotation	other_names_and_aliases
XP_009152240.1	5970.XP_009152240.1	https://smart.embl.de/smart/DDvec.cgi?smart=470:Pfam_Aminotran_1_2(52|457)+	1-aminocyclopropane-1-carboxylate synthase	1-aminocyclopropane-1-carboxylate synthase	1-aminocyclopropane-1-carboxylate synthase	1-aminocyclopropane-1-carboxylate synthase	20304645	20304645	684156724	GI:684156724	GeneID:20304645	GeneID:20304645	H6BKX8	H6BKX8_EXODN	HMPREF1120_00006	HMPREF1120_00006	XM_009153992.1	XP_009152240	XP_009152240.1	XP_009152240.1	XP_009152240.1
XP_009152241.1	5970.XP_009152241.1	http://smart.embl.de/smart/DDt.cgi?smart=589:	Uncharacterized protein	20304646	20304646	684156726	GI:684156726	GeneID:20304646	GeneID:20304646	H6BKX9	H6BKX9_EXODN	HMPREF1120_00007	HMPREF1120_00007	Hypothetical protein	Uncharacterized protein	XM_009153993.1	XP_009152241	XP_009152241.1	XP_009152241.1	XP_009152241.1	hypothetical protein	hypothetical protein
XP_009152246.1	5970.XP_009152246.1	https://smart.embl.de/smart/DDvec.cgi?smart=497:Pfam_MFS_1(23|421)+TRANS(447|469)+	MFS transporter, DHA2 family, methylenomycin A resistance protein	20304651	20304651	684156736	GI:684156736	GeneID:20304651	GeneID:20304651	H6BKY4	H6BKY4_EXODN	HMPREF1120_00012	HMPREF1120_00012	XM_009153998.1	XP_009152246	XP_009152246.1	XP_009152246.1	XP_009152246.1
XP_009152252.1	5970.XP_009152252.1	https://smart.embl.de/smart/DDvec.cgi?smart=349:RING(241|288)+	Uncharacterized protein	20304657	20304657	684156748	GI:684156748	GeneID:20304657	GeneID:20304657	H6BKZ0	H6BKZ0_EXODN	HMPREF1120_00018	HMPREF1120_00018	Hypothetical protein	Uncharacterized protein	XM_009154004.1	XP_009152252	XP_009152252.1	XP_009152252.1	XP_009152252.1	hypothetical protein	hypothetical protein
XP_009152260.1	5970.XP_009152260.1	https://smart.embl.de/smart/DDvec.cgi?smart=598:TRANS(12|34)+Pfam_G_glu_transpept(79|592)+	Gamma-glutamyltransferase	20304665	20304665	684156764	GI:684156764	Gamma-glutamyltransferase	Gamma-glutamyltransferase	GeneID:20304665	GeneID:20304665	H6BKZ8	H6BKZ8_EXODN	HMPREF1120_00026	HMPREF1120_00026	XM_009154012.1	XP_009152260	XP_009152260.1	XP_009152260.1	XP_009152260.1	gamma-glutamyltransferase	gamma-glutamyltransferase
XP_009152261.1	5970.XP_009152261.1	https://smart.embl.de/smart/DDvec.cgi?smart=897:HisKA(258|323)+HATPase_c(530|647)+REC(738|883)+	Two-component system, NarL family, sensor histidine kinase BarA	20304666	20304666	684156766	GI:684156766	GeneID:20304666	GeneID:20304666	H6BKZ9	H6BKZ9_EXODN	HMPREF1120_00027	HMPREF1120_00027	XM_009154013.1	XP_009152261	XP_009152261.1	XP_009152261.1	XP_009152261.1
XP_009152272.1	5970.XP_009152272.1	https://smart.embl.de/smart/DDvec.cgi?smart=378:Pfam_Aldo_ket_red(31|341)+	Aryl-alcohol dehydrogenase AAD14	20304677	20304677	684156788	Aryl-alcohol dehydrogenase AAD14	Aryl-alcohol dehydrogenase AAD14	GI:684156788	GeneID:20304677	GeneID:20304677	H6BL64	H6BL64_EXODN	HMPREF1120_00038	HMPREF1120_00038	XM_009154024.1	XP_009152272	XP_009152272.1	XP_009152272.1	XP_009152272.1	aryl-alcohol dehydrogenase AAD14	aryl-alcohol dehydrogenase AAD14
XP_009152280.1	5970.XP_009152280.1	https://smart.embl.de/smart/DDvec.cgi?smart=475:TRANS(46|68)+COIL(189|222)+	Uncharacterized protein	20304685	20304685	684156804	GI:684156804	GeneID:20304685	GeneID:20304685	H6BL72	H6BL72_EXODN	HMPREF1120_00046	HMPREF1120_00046	Hypothetical protein	Uncharacterized protein	XM_009154032.1	XP_009152280	XP_009152280.1	XP_009152280.1	XP_009152280.1	hypothetical protein	hypothetical protein
XP_009152285.1	5970.XP_009152285.1	https://smart.embl.de/smart/DDvec.cgi?smart=631:Fungal_trans(118|201)+	Uncharacterized protein	20304690	20304690	684156814	GI:684156814	GeneID:20304690	GeneID:20304690	H6BL78	H6BL78_EXODN	HMPREF1120_00051	HMPREF1120_00051	Hypothetical protein	Uncharacterized protein	XM_009154038.1	XP_009152285	XP_009152285.1	XP_009152285.1	XP_009152285.1	XP_009152286.1	XP_009152287.1	hypothetical protein	hypothetical protein
XP_009152290.1	5970.XP_009152290.1	https://smart.embl.de/smart/DDvec.cgi?smart=301:SIGNAL(1|18)+TRANS(255|277)+	Uncharacterized protein	20304693	20304693	684156824	GI:684156824	GeneID:20304693	GeneID:20304693	H6BL82	H6BL82_EXODN	HMPREF1120_00054	HMPREF1120_00054	Hypothetical protein	Uncharacterized protein	XM_009154042.1	XP_009152290	XP_009152290.1	XP_009152290.1	XP_009152290.1	hypothetical protein	hypothetical protein
XP_009152295.1	5970.XP_009152295.1	http://smart.embl.de/smart/DDt.cgi?smart=591:	Uncharacterized protein	20304698	20304698	684156834	GI:684156834	GeneID:20304698	GeneID:20304698	H6BL87	H6BL87_EXODN	HMPREF1120_00059	HMPREF1120_00059	Hypothetical protein	Uncharacterized protein	XM_009154047.1	XP_009152295	XP_009152295.1	XP_009152295.1	XP_009152295.1	hypothetical protein	hypothetical protein
XP_009152302.1	5970.XP_009152302.1	https://smart.embl.de/smart/DDvec.cgi?smart=499:TRANS(67|89)+Pfam_Peptidase_M19(114|477)+	Membrane dipeptidase; Belongs to the metallo-dependent hydrolases superfamily. Peptidase M19 family	20304705	20304705	684156848	Dipeptidase	GI:684156848	GeneID:20304705	GeneID:20304705	H6BL94	H6BL94_EXODN	HMPREF1120_00066	HMPREF1120_00066	Membrane dipeptidase	XM_009154054.1	XP_009152302	XP_009152302.1	XP_009152302.1	XP_009152302.1	membrane dipeptidase	membrane dipeptidase
XP_009152312.1	5970.XP_009152312.1	http://smart.embl.de/smart/DDt.cgi?smart=318:	Uncharacterized protein	20304715	20304715	684156868	GI:684156868	GeneID:20304715	GeneID:20304715	H6BLA4	H6BLA4_EXODN	HMPREF1120_00076	HMPREF1120_00076	Hypothetical protein	Uncharacterized protein	XM_009154065.1	XP_009152312	XP_009152312.1	XP_009152312.1	XP_009152312.1	XP_009152313.1	hypothetical protein	hypothetical protein
XP_009152324.1	5970.XP_009152324.1	https://smart.embl.de/smart/DDvec.cgi?smart=613:Pfam_MFS_1(119|522)+TRANS(581|600)+	DNA repair protein RAD50	20304725	20304725	684156892	DNA repair protein RAD50	DNA repair protein RAD50	DNA repair protein RAD50	GI:684156892	GeneID:20304725	GeneID:20304725	H6BLB6	H6BLB6_EXODN	HMPREF1120_00086	HMPREF1120_00086	XM_009154076.1	XP_009152324	XP_009152324.1	XP_009152324.1	XP_009152324.1
XP_009152327.1	5970.XP_009152327.1	https://smart.embl.de/smart/DDvec.cgi?smart=985:S_TKc(23|331)+COIL(475|504)+Pfam_DUF3543(662|946)+	Unc51-like kinase	20304728	20304728	684156898	GI:684156898	GeneID:20304728	GeneID:20304728	H6BLH3	H6BLH3_EXODN	HMPREF1120_00089	HMPREF1120_00089	Unc51-like kinase	Unc51-like kinase	XM_009154079.1	XP_009152327	XP_009152327.1	XP_009152327.1	XP_009152327.1	unc51-like kinase	unc51-like kinase
XP_009152338.1	5970.XP_009152338.1	https://smart.embl.de/smart/DDvec.cgi?smart=355:Pfam_NMO(11|334)+	Oxidoreductase, 2-nitropropane dioxygenase	20304739	20304739	684156920	GI:684156920	GeneID:20304739	GeneID:20304739	H6BLI4	H6BLI4_EXODN	HMPREF1120_00100	HMPREF1120_00100	Oxidoreductase, 2-nitropropane dioxygenase	Oxidoreductase, 2-nitropropane dioxygenase	XM_009154090.1	XP_009152338	XP_009152338.1	XP_009152338.1	XP_009152338.1	oxidoreductase, 2-nitropropane dioxygenase	oxidoreductase, 2-nitropropane dioxygenase
XP_009152339.1	5970.XP_009152339.1	https://smart.embl.de/smart/DDvec.cgi?smart=263:Pfam_Pkinase_Tyr(59|191)+	Uncharacterized protein	20304740	20304740	684156922	GI:684156922	GeneID:20304740	GeneID:20304740	H6BLI5	H6BLI5_EXODN	HMPREF1120_00101	HMPREF1120_00101	Hypothetical protein	Uncharacterized protein	XM_009154091.1	XP_009152339	XP_009152339.1	XP_009152339.1	XP_009152339.1	hypothetical protein	hypothetical protein
XP_009152340.1	5970.XP_009152340.1	https://smart.embl.de/smart/DDvec.cgi?smart=509:Pfam_DNA_pol_E_B(214|458)+	DNA polymerase delta subunit 2	20304741	20304741	684156924	DNA polymerase delta subunit 2	DNA polymerase delta subunit 2	DNA polymerase delta subunit 2	GI:684156924	GeneID:20304741	GeneID:20304741	H6BLI6	H6BLI6_EXODN	HMPREF1120_00102	HMPREF1120_00102	XM_009154092.1	XP_009152340	XP_009152340.1	XP_009152340.1	XP_009152340.1
XP_009152343.1	5970.XP_009152343.1	https://smart.embl.de/smart/DDvec.cgi?smart=513:Pfam_TUG-UBL1(8|71)+UBX(349|437)+	Uncharacterized protein	20304744	20304744	684156930	GI:684156930	GeneID:20304744	GeneID:20304744	H6BLI9	H6BLI9_EXODN	HMPREF1120_00105	HMPREF1120_00105	Hypothetical protein	Uncharacterized protein	XM_009154095.1	XP_009152343	XP_009152343.1	XP_009152343.1	XP_009152343.1	hypothetical protein	hypothetical protein
hxB	5970.XP_009152347.1	https://smart.embl.de/smart/DDvec.cgi?smart=839:Pfam_Aminotran_5(45|469)+Pfam_MOSC_N(498|637)+Pfam_MOSC(676|836)+	Molybdenum cofactor sulfurase; Sulfurates the molybdenum cofactor. Sulfation of molybdenum is essential for xanthine dehydrogenase (XDH) and aldehyde oxidase (ADO) enzymes in which molybdenum cofactor is liganded by 1 oxygen and 1 sulfur atom in active form	20304748	20304748	684156938	GI:684156938	GeneID:20304748	GeneID:20304748	H6BLJ3	H6BLJ3_EXODN	HMPREF1120_00109	HMPREF1120_00109	Molybdenum cofactor sulfurase	Molybdenum cofactor sulfurtransferase	Selenocysteine lyase	XM_009154099.1	XP_009152347	XP_009152347.1	XP_009152347.1	XP_009152347.1	hxB	selenocysteine lyase	selenocysteine lyase
XP_009152351.1	5970.XP_009152351.1	https://smart.embl.de/smart/DDvec.cgi?smart=370:Pfam_ADH_N(37|151)+Pfam_ADH_zinc_N_2(226|366)+	Alcohol dehydrogenase	20304752	20304752	684156946	Alcohol dehydrogenase	Alcohol dehydrogenase	GI:684156946	GeneID:20304752	GeneID:20304752	H6BLJ7	H6BLJ7_EXODN	HMPREF1120_00113	HMPREF1120_00113	XM_009154103.1	XP_009152351	XP_009152351.1	XP_009152351.1	XP_009152351.1	alcohol dehydrogenase	alcohol dehydrogenase
XP_009152367.1	5970.XP_009152367.1	https://smart.embl.de/smart/DDvec.cgi?smart=1499:TRANS(185|204)+Pfam_ABC_membrane(346|524)+COIL(593|623)+AAA(652|825)+Pfam_ABC_membrane(911|1176)+AAA(1250|1464)+	ABC multidrug transporter	20304768	20304768	684156978	ABC multidrug transporter	ABC multidrug transporter	ABC multidrug transporter	GI:684156978	GeneID:20304768	GeneID:20304768	H6BLL3	H6BLL3_EXODN	HMPREF1120_00129	HMPREF1120_00129	XM_009154119.1	XP_009152367	XP_009152367.1	XP_009152367.1	XP_009152367.1
XP_009152378.1	5970.XP_009152378.1	https://smart.embl.de/smart/DDvec.cgi?smart=1407:Pfam_Syja_N(81|424)+IPPc(621|954)+	Inositol-1,4,5-trisphosphate 5-phosphatase	20304779	20304779	684157000	GI:684157000	GeneID:20304779	GeneID:20304779	H6BLM4	H6BLM4_EXODN	HMPREF1120_00140	HMPREF1120_00140	Inositol-1,4,5-trisphosphate 5-phosphatase	Inositol-1,4,5-trisphosphate 5-phosphatase	XM_009154130.1	XP_009152378	XP_009152378.1	XP_009152378.1	XP_009152378.1	inositol-1,4,5-trisphosphate 5-phosphatase	inositol-1,4,5-trisphosphate 5-phosphatase
XP_009152384.1	5970.XP_009152384.1	http://smart.embl.de/smart/DDt.cgi?smart=718:	Uncharacterized protein	20304785	20304785	684157012	GI:684157012	GeneID:20304785	GeneID:20304785	H6BLT4	H6BLT4_EXODN	HMPREF1120_00146	HMPREF1120_00146	Hypothetical protein	Uncharacterized protein	XM_009154136.1	XP_009152384	XP_009152384.1	XP_009152384.1	XP_009152384.1	hypothetical protein	hypothetical protein
XP_009152396.1	5970.XP_009152396.1	https://smart.embl.de/smart/DDvec.cgi?smart=508:Pfam_UPF0183(17|296)+Pfam_UPF0183(311|508)+	isoleucyl-tRNA synthetase	20304797	20304797	684157036	GI:684157036	GeneID:20304797	GeneID:20304797	H6BLU6	H6BLU6_EXODN	HMPREF1120_00158	HMPREF1120_00158	Isoleucyl-tRNA synthetase	XM_009154148.1	XP_009152396	XP_009152396.1	XP_009152396.1	XP_009152396.1	isoleucyl-tRNA synthetase	isoleucyl-tRNA synthetase
XP_009152398.1	5970.XP_009152398.1	https://smart.embl.de/smart/DDvec.cgi?smart=375:COIL(299|335)+	Uncharacterized protein	20304799	20304799	684157040	GI:684157040	GeneID:20304799	GeneID:20304799	H6BLU8	H6BLU8_EXODN	HMPREF1120_00160	HMPREF1120_00160	Hypothetical protein	Uncharacterized protein	XM_009154150.1	XP_009152398	XP_009152398.1	XP_009152398.1	XP_009152398.1	hypothetical protein	hypothetical protein
XP_009152401.1	5970.XP_009152401.1	https://smart.embl.de/smart/DDvec.cgi?smart=2474:FYVE(432|500)+Pfam_Cpn60_TCP1(804|1070)+Pfam_PIP5K(2205|2383)+Pfam_PIP5K(2376|2435)+	1-phosphatidylinositol-3-phosphate 5-kinase	1-phosphatidylinositol-3-phosphate 5-kinase	1-phosphatidylinositol-3-phosphate 5-kinase	1-phosphatidylinositol-3-phosphate 5-kinase	20304802	20304802	684157046	GI:684157046	GeneID:20304802	GeneID:20304802	H6BLV1	H6BLV1_EXODN	HMPREF1120_00163	HMPREF1120_00163	XM_009154153.1	XP_009152401	XP_009152401.1	XP_009152401.1	XP_009152401.1
XP_009152414.1	5970.XP_009152414.1	https://smart.embl.de/smart/DDvec.cgi?smart=543:Pfam_UBA_4(2|44)+UAS(222|348)+UBX(461|540)+	Uncharacterized protein	20304815	20304815	684157072	GI:684157072	GeneID:20304815	GeneID:20304815	H6BLW4	H6BLW4_EXODN	HMPREF1120_00176	HMPREF1120_00176	Hypothetical protein	Uncharacterized protein	XM_009154166.1	XP_009152414	XP_009152414.1	XP_009152414.1	XP_009152414.1	hypothetical protein	hypothetical protein
XP_009152419.1	5970.XP_009152419.1	https://smart.embl.de/smart/DDvec.cgi?smart=1013:TRANS(20|39)+Pfam_Na_Ca_ex(108|250)+TRANS(773|792)+TRANS(802|824)+Pfam_Na_Ca_ex(837|1002)+	Uncharacterized protein; Belongs to the Ca(2+):cation antiporter (CaCA) (TC 2.A.19) family	20304820	20304820	684157082	GI:684157082	GeneID:20304820	GeneID:20304820	H6BLW9	H6BLW9_EXODN	HMPREF1120_00181	HMPREF1120_00181	Hypothetical protein	Uncharacterized protein	XM_009154171.1	XP_009152419	XP_009152419.1	XP_009152419.1	XP_009152419.1	hypothetical protein	hypothetical protein
XP_009152423.1	5970.XP_009152423.1	https://smart.embl.de/smart/DDvec.cgi?smart=479:Pfam_MFS_1(50|424)+TRANS(440|462)+	MFS transporter, DHA1 family, multidrug resistance protein	20304824	20304824	684157090	GI:684157090	GeneID:20304824	GeneID:20304824	H6BLX3	H6BLX3_EXODN	HMPREF1120_00185	HMPREF1120_00185	XM_009154175.1	XP_009152423	XP_009152423.1	XP_009152423.1	XP_009152423.1
XP_009152424.1	5970.XP_009152424.1	https://smart.embl.de/smart/DDvec.cgi?smart=360:Pfam_Fe-ADH_2(14|262)+	Maleylacetate reductase	20304825	20304825	684157092	GI:684157092	GeneID:20304825	GeneID:20304825	H6BLX4	H6BLX4_EXODN	HMPREF1120_00186	HMPREF1120_00186	Maleylacetate reductase	Maleylacetate reductase	XM_009154176.1	XP_009152424	XP_009152424.1	XP_009152424.1	XP_009152424.1	maleylacetate reductase	maleylacetate reductase
XP_009152431.1	5970.XP_009152431.1	https://smart.embl.de/smart/DDvec.cgi?smart=552:Pfam_AA_permease(50|508)+	AAT family amino acid transporter	20304832	20304832	684157106	AAT family amino acid transporter	AAT family amino acid transporter	AAT family amino acid transporter	GI:684157106	GeneID:20304832	GeneID:20304832	H6BLY1	H6BLY1_EXODN	HMPREF1120_00193	HMPREF1120_00193	XM_009154183.1	XP_009152431	XP_009152431.1	XP_009152431.1	XP_009152431.1
XP_009152432.1	5970.XP_009152432.1	https://smart.embl.de/smart/DDvec.cgi?smart=364:Pfam_Abhydrolase_6(87|352)+	Uncharacterized protein	20304833	20304833	684157108	GI:684157108	GeneID:20304833	GeneID:20304833	H6BLY2	H6BLY2_EXODN	HMPREF1120_00194	HMPREF1120_00194	Hypothetical protein	Uncharacterized protein	XM_009154184.1	XP_009152432	XP_009152432.1	XP_009152432.1	XP_009152432.1	hypothetical protein	hypothetical protein
XP_009152433.1	5970.XP_009152433.1	https://smart.embl.de/smart/DDvec.cgi?smart=213:Pfam_DUF2196(2|61)+	Uncharacterized protein	20304834	20304834	684157110	GI:684157110	GeneID:20304834	GeneID:20304834	H6BM36	H6BM36_EXODN	HMPREF1120_00195	HMPREF1120_00195	Hypothetical protein	Uncharacterized protein	XM_009154185.1	XP_009152433	XP_009152433.1	XP_009152433.1	XP_009152433.1	hypothetical protein	hypothetical protein
XP_009152434.1	5970.XP_009152434.1	https://smart.embl.de/smart/DDvec.cgi?smart=315:Pfam_PhyH(38|238)+	Uncharacterized protein	20304835	20304835	684157112	GI:684157112	GeneID:20304835	GeneID:20304835	H6BM37	H6BM37_EXODN	HMPREF1120_00196	HMPREF1120_00196	Hypothetical protein	Uncharacterized protein	XM_009154186.1	XP_009152434	XP_009152434.1	XP_009152434.1	XP_009152434.1	hypothetical protein	hypothetical protein
XP_009152435.1	5970.XP_009152435.1	https://smart.embl.de/smart/DDvec.cgi?smart=498:Pfam_UNC-93(72|201)+TRANS(437|459)+	Uncharacterized protein	20304836	20304836	684157114	GI:684157114	GeneID:20304836	GeneID:20304836	H6BM38	H6BM38_EXODN	HMPREF1120_00197	HMPREF1120_00197	Hypothetical protein	Uncharacterized protein	XM_009154187.1	XP_009152435	XP_009152435.1	XP_009152435.1	XP_009152435.1	hypothetical protein	hypothetical protein
XP_009152436.1	5970.XP_009152436.1	https://smart.embl.de/smart/DDvec.cgi?smart=482:GAL4(7|51)+Pfam_Fungal_trans_2(126|466)+	Uncharacterized protein	20304837	20304837	684157116	GI:684157116	GeneID:20304837	GeneID:20304837	H6BM39	H6BM39_EXODN	HMPREF1120_00198	HMPREF1120_00198	Hypothetical protein	Uncharacterized protein	XM_009154188.1	XP_009152436	XP_009152436.1	XP_009152436.1	XP_009152436.1	hypothetical protein	hypothetical protein
XP_009152455.1	5970.XP_009152455.1	https://smart.embl.de/smart/DDvec.cgi?smart=753:Pfam_SesA(11|139)+ANK(369|398)+ANK(478|507)+ANK(511|537)+ANK(541|573)+ANK(577|606)+ANK(610|639)+	Ankyrin	20304856	20304856	684157154	Ankyrin	Ankyrin	GI:684157154	GeneID:20304856	GeneID:20304856	H6BM58	H6BM58_EXODN	HMPREF1120_00217	HMPREF1120_00217	XM_009154207.1	XP_009152455	XP_009152455.1	XP_009152455.1	XP_009152455.1	ankyrin	ankyrin
XP_009152462.1	5970.XP_009152462.1	https://smart.embl.de/smart/DDvec.cgi?smart=465:Pfam_G-patch_2(205|268)+	Uncharacterized protein	20304863	20304863	684157168	GI:684157168	GeneID:20304863	GeneID:20304863	H6BM65	H6BM65_EXODN	HMPREF1120_00224	HMPREF1120_00224	Hypothetical protein	Uncharacterized protein	XM_009154214.1	XP_009152462	XP_009152462.1	XP_009152462.1	XP_009152462.1	hypothetical protein	hypothetical protein
XP_009152463.1	5970.XP_009152463.1	https://smart.embl.de/smart/DDvec.cgi?smart=476:RING(25|68)+	Uncharacterized protein	20304864	20304864	684157170	GI:684157170	GeneID:20304864	GeneID:20304864	H6BM66	H6BM66_EXODN	HMPREF1120_00225	HMPREF1120_00225	Hypothetical protein	Uncharacterized protein	XM_009154215.1	XP_009152463	XP_009152463.1	XP_009152463.1	XP_009152463.1	hypothetical protein	hypothetical protein
XP_009152490.1	5970.XP_009152490.1	http://smart.embl.de/smart/DDt.cgi?smart=135:	Uncharacterized protein	20304888	20304888	684157224	GI:684157224	GeneID:20304888	GeneID:20304888	H6BME7	H6BME7_EXODN	HMPREF1120_00249	HMPREF1120_00249	Hypothetical protein	Uncharacterized protein	XM_009154243.1	XP_009152490	XP_009152490.1	XP_009152490.1	XP_009152490.1	XP_009152491.1	hypothetical protein	hypothetical protein
XP_009152498.1	5970.XP_009152498.1	https://smart.embl.de/smart/DDvec.cgi?smart=732:Pfam_IMS(140|283)+Pfam_IMS_HHH(297|328)+Pfam_IMS_C(367|483)+COIL(512|546)+	DNA polymerase kappa subunit	20304895	20304895	684157240	DNA polymerase kappa subunit	DNA polymerase kappa subunit	DNA polymerase kappa subunit	GI:684157240	GeneID:20304895	GeneID:20304895	H6BMF5	H6BMF5_EXODN	HMPREF1120_00256	HMPREF1120_00256	XM_009154250.1	XP_009152498	XP_009152498.1	XP_009152498.1	XP_009152498.1
XP_009152501.1	5970.XP_009152501.1	https://smart.embl.de/smart/DDvec.cgi?smart=876:FHA(23|87)+Pfam_NIBRIN_BRCT_II(240|363)+COIL(575|608)+COIL(702|721)+	Uncharacterized protein	20304898	20304898	684157246	GI:684157246	GeneID:20304898	GeneID:20304898	H6BMF8	H6BMF8_EXODN	HMPREF1120_00259	HMPREF1120_00259	Hypothetical protein	Uncharacterized protein	XM_009154253.1	XP_009152501	XP_009152501.1	XP_009152501.1	XP_009152501.1	hypothetical protein	hypothetical protein
XP_009152506.1	5970.XP_009152506.1	https://smart.embl.de/smart/DDvec.cgi?smart=300:Bac_rhodopsin(42|280)+	Bacteriorhodopsin	20304903	20304903	684157256	Bacteriorhodopsin	Bacteriorhodopsin	GI:684157256	GeneID:20304903	GeneID:20304903	H6BMG3	H6BMG3_EXODN	HMPREF1120_00264	HMPREF1120_00264	XM_009154258.1	XP_009152506	XP_009152506.1	XP_009152506.1	XP_009152506.1	bacteriorhodopsin	bacteriorhodopsin
XP_009152510.1	5970.XP_009152510.1	https://smart.embl.de/smart/DDvec.cgi?smart=366:Pfam_Acyl_transf_3(2|354)+	Uncharacterized protein	20304907	20304907	684157264	GI:684157264	GeneID:20304907	GeneID:20304907	H6BMG7	H6BMG7_EXODN	HMPREF1120_00268	HMPREF1120_00268	Hypothetical protein	Uncharacterized protein	XM_009154262.1	XP_009152510	XP_009152510.1	XP_009152510.1	XP_009152510.1	hypothetical protein	hypothetical protein
XP_009152514.1	5970.XP_009152514.1	https://smart.embl.de/smart/DDvec.cgi?smart=495:Pfam_HlyIII(252|474)+	Uncharacterized protein	20304911	20304911	684157272	GI:684157272	GeneID:20304911	GeneID:20304911	H6BMH1	H6BMH1_EXODN	HMPREF1120_00272	HMPREF1120_00272	Hypothetical protein	Uncharacterized protein	XM_009154266.1	XP_009152514	XP_009152514.1	XP_009152514.1	XP_009152514.1	hypothetical protein	hypothetical protein
XP_009152524.1	5970.XP_009152524.1	http://smart.embl.de/smart/DDt.cgi?smart=412:	Uncharacterized protein	20304921	20304921	684157292	GI:684157292	GeneID:20304921	GeneID:20304921	H6BMI1	H6BMI1_EXODN	HMPREF1120_00282	HMPREF1120_00282	Hypothetical protein	Uncharacterized protein	XM_009154276.1	XP_009152524	XP_009152524.1	XP_009152524.1	XP_009152524.1	hypothetical protein	hypothetical protein
XP_009152531.1	5970.XP_009152531.1	https://smart.embl.de/smart/DDvec.cgi?smart=353:Pfam_FMN_dh(62|246)+	Oxidoreductase 2-nitropropane dioxygenase	20304928	20304928	684157306	GI:684157306	GeneID:20304928	GeneID:20304928	H6BMI8	H6BMI8_EXODN	HMPREF1120_00289	HMPREF1120_00289	Oxidoreductase 2-nitropropane dioxygenase	Oxidoreductase 2-nitropropane dioxygenase	XM_009154283.1	XP_009152531	XP_009152531.1	XP_009152531.1	XP_009152531.1	oxidoreductase 2-nitropropane dioxygenase	oxidoreductase 2-nitropropane dioxygenase
XP_009152540.1	5970.XP_009152540.1	https://smart.embl.de/smart/DDvec.cgi?smart=684:GAL4(26|70)+Pfam_Fungal_trans_2(247|684)+	Uncharacterized protein	20304937	20304937	684157324	GI:684157324	GeneID:20304937	GeneID:20304937	H6BMJ7	H6BMJ7_EXODN	HMPREF1120_00298	HMPREF1120_00298	Hypothetical protein	Uncharacterized protein	XM_009154292.1	XP_009152540	XP_009152540.1	XP_009152540.1	XP_009152540.1	hypothetical protein	hypothetical protein
XP_009152543.1	5970.XP_009152543.1	https://smart.embl.de/smart/DDvec.cgi?smart=216:SIGNAL(1|17)+TRANS(193|215)+	Uncharacterized protein	20304940	20304940	684157330	GI:684157330	GeneID:20304940	GeneID:20304940	H6BMQ4	H6BMQ4_EXODN	HMPREF1120_00301	HMPREF1120_00301	Hypothetical protein	Uncharacterized protein	XM_009154295.1	XP_009152543	XP_009152543.1	XP_009152543.1	XP_009152543.1	hypothetical protein	hypothetical protein
XP_009152545.1	5970.XP_009152545.1	http://smart.embl.de/smart/DDt.cgi?smart=153:	Uncharacterized protein	20304942	20304942	684157334	GI:684157334	GeneID:20304942	GeneID:20304942	H6BMQ5	H6BMQ5_EXODN	HMPREF1120_00303	HMPREF1120_00303	Hypothetical protein	Uncharacterized protein	XM_009154297.1	XP_009152545	XP_009152545.1	XP_009152545.1	XP_009152545.1	hypothetical protein	hypothetical protein
XP_009152548.1	5970.XP_009152548.1	https://smart.embl.de/smart/DDvec.cgi?smart=243:Pfam_PBP(55|239)+	Uncharacterized protein	20304945	20304945	684157340	GI:684157340	GeneID:20304945	GeneID:20304945	H6BMQ9	H6BMQ9_EXODN	HMPREF1120_00306	HMPREF1120_00306	Hypothetical protein	Uncharacterized protein	XM_009154300.1	XP_009152548	XP_009152548.1	XP_009152548.1	XP_009152548.1	hypothetical protein	hypothetical protein
XP_009152549.1	5970.XP_009152549.1	https://smart.embl.de/smart/DDvec.cgi?smart=660:GAL4(29|76)+	Transcriptional regulatory protein LEU3	20304946	20304946	684157342	GI:684157342	GeneID:20304946	GeneID:20304946	H6BMR0	H6BMR0_EXODN	HMPREF1120_00307	HMPREF1120_00307	Transcriptional regulatory protein LEU3	Transcriptional regulatory protein LEU3	XM_009154301.1	XP_009152549	XP_009152549.1	XP_009152549.1	XP_009152549.1	transcriptional regulatory protein LEU3	transcriptional regulatory protein LEU3
XP_009152563.1	5970.XP_009152563.1	https://smart.embl.de/smart/DDvec.cgi?smart=344:Pfam_ADH_zinc_N_2(203|339)+	Alcohol dehydrogenase	20304960	20304960	684157370	Alcohol dehydrogenase	Alcohol dehydrogenase	GI:684157370	GeneID:20304960	GeneID:20304960	H6BMS4	H6BMS4_EXODN	HMPREF1120_00321	HMPREF1120_00321	XM_009154315.1	XP_009152563	XP_009152563.1	XP_009152563.1	XP_009152563.1	alcohol dehydrogenase	alcohol dehydrogenase
XP_009152564.1	5970.XP_009152564.1	https://smart.embl.de/smart/DDvec.cgi?smart=298:Pfam_DUF1640(123|297)+	Uncharacterized protein	20304961	20304961	684157372	GI:684157372	GeneID:20304961	GeneID:20304961	H6BMS5	H6BMS5_EXODN	HMPREF1120_00322	HMPREF1120_00322	Hypothetical protein	Uncharacterized protein	XM_009154316.1	XP_009152564	XP_009152564.1	XP_009152564.1	XP_009152564.1	hypothetical protein	hypothetical protein
XP_009152565.1	5970.XP_009152565.1	http://smart.embl.de/smart/DDt.cgi?smart=248:	Uncharacterized protein	20304962	20304962	684157374	GI:684157374	GeneID:20304962	GeneID:20304962	H6BMS6	H6BMS6_EXODN	HMPREF1120_00323	HMPREF1120_00323	Hypothetical protein	Uncharacterized protein	XM_009154318.1	XP_009152565	XP_009152565.1	XP_009152565.1	XP_009152565.1	hypothetical protein	hypothetical protein
XP_009152574.1	5970.XP_009152574.1	https://smart.embl.de/smart/DDvec.cgi?smart=1151:Pfam_PC_rep(612|646)+EZ_HEAT(747|780)+	26S proteasome regulatory subunit N2	20304969	20304969	26S proteasome regulatory subunit N2	26S proteasome regulatory subunit N2	26S proteasome regulatory subunit N2	684157392	GI:684157392	GeneID:20304969	GeneID:20304969	H6BMT5	H6BMT5_EXODN	HMPREF1120_00330	HMPREF1120_00330	XM_009154326.1	XP_009152574	XP_009152574.1	XP_009152574.1	XP_009152574.1
XP_009152584.1	5970.XP_009152584.1	https://smart.embl.de/smart/DDvec.cgi?smart=517:COIL(149|176)+TRANS(183|205)+TRANS(225|247)+TRANS(259|281)+TRANS(332|354)+	Uncharacterized protein	20304979	20304979	684157412	GI:684157412	GeneID:20304979	GeneID:20304979	H6BMU5	H6BMU5_EXODN	HMPREF1120_00340	HMPREF1120_00340	Hypothetical protein	Uncharacterized protein	XM_009154336.1	XP_009152584	XP_009152584.1	XP_009152584.1	XP_009152584.1	hypothetical protein	hypothetical protein
XP_009152585.1	5970.XP_009152585.1	https://smart.embl.de/smart/DDvec.cgi?smart=377:COIL(305|336)+	Uncharacterized protein	20304980	20304980	684157414	GI:684157414	GeneID:20304980	GeneID:20304980	H6BMU6	H6BMU6_EXODN	HMPREF1120_00341	HMPREF1120_00341	Hypothetical protein	Uncharacterized protein	XM_009154337.1	XP_009152585	XP_009152585.1	XP_009152585.1	XP_009152585.1	hypothetical protein	hypothetical protein
XP_009152592.1	5970.XP_009152592.1	https://smart.embl.de/smart/DDvec.cgi?smart=1501:Pfam_Rif1_N(122|497)+	RAP1-interacting factor 1	20304987	20304987	684157428	GI:684157428	GeneID:20304987	GeneID:20304987	H6BMV3	H6BMV3_EXODN	HMPREF1120_00348	HMPREF1120_00348	RAP1-interacting factor 1	RAP1-interacting factor 1	RAP1-interacting factor 1	XM_009154344.1	XP_009152592	XP_009152592.1	XP_009152592.1	XP_009152592.1
XP_009152615.1	5970.XP_009152615.1	https://smart.embl.de/smart/DDvec.cgi?smart=228:Pfam_Acetyltransf_7(56|203)+	Uncharacterized protein	20305010	20305010	684157474	GI:684157474	GeneID:20305010	GeneID:20305010	H6BN30	H6BN30_EXODN	HMPREF1120_00371	HMPREF1120_00371	Hypothetical protein	Uncharacterized protein	XM_009154367.1	XP_009152615	XP_009152615.1	XP_009152615.1	XP_009152615.1	hypothetical protein	hypothetical protein
XP_009152618.1	5970.XP_009152618.1	https://smart.embl.de/smart/DDvec.cgi?smart=1469:DEXDc(225|506)+RING(1079|1116)+HELICc(1220|1296)+	Adenosinetriphosphatase	20305013	20305013	684157480	Adenosinetriphosphatase	Adenosinetriphosphatase	GI:684157480	GeneID:20305013	GeneID:20305013	H6BN33	H6BN33_EXODN	HMPREF1120_00374	HMPREF1120_00374	XM_009154370.1	XP_009152618	XP_009152618.1	XP_009152618.1	XP_009152618.1	adenosinetriphosphatase	adenosinetriphosphatase
XP_009152619.1	5970.XP_009152619.1	https://smart.embl.de/smart/DDvec.cgi?smart=222:BRLZ(150|214)+	Uncharacterized protein	20305014	20305014	684157482	GI:684157482	GeneID:20305014	GeneID:20305014	H6BN34	H6BN34_EXODN	HMPREF1120_00375	HMPREF1120_00375	Hypothetical protein	Uncharacterized protein	XM_009154372.1	XP_009152619	XP_009152619.1	XP_009152619.1	XP_009152619.1	XP_009152620.1	hypothetical protein	hypothetical protein
XP_009152623.1	5970.XP_009152623.1	https://smart.embl.de/smart/DDvec.cgi?smart=593:Pfam_FAD_binding_4(170|308)+Pfam_FAD-oxidase_C(344|586)+	D-lactate dehydrogenase (cytochrome)	20305017	20305017	684157490	D-lactate dehydrogenase (Cytochrome)	D-lactate dehydrogenase (cytochrome)	D-lactate dehydrogenase (cytochrome)	GI:684157490	GeneID:20305017	GeneID:20305017	H6BN39	H6BN39_EXODN	HMPREF1120_00378	HMPREF1120_00378	XM_009154375.1	XP_009152623	XP_009152623.1	XP_009152623.1	XP_009152623.1
XP_009152624.1	5970.XP_009152624.1	https://smart.embl.de/smart/DDvec.cgi?smart=404:Pfam_ADH_N(53|118)+	NADPH2:quinone reductase	20305018	20305018	684157492	GI:684157492	GeneID:20305018	GeneID:20305018	H6BN38	H6BN38_EXODN	HMPREF1120_00379	HMPREF1120_00379	NADPH2:quinone reductase	NADPH2:quinone reductase	NADPH2:quinone reductase	XM_009154376.1	XP_009152624	XP_009152624.1	XP_009152624.1	XP_009152624.1
XP_009152625.1	5970.XP_009152625.1	http://smart.embl.de/smart/DDt.cgi?smart=1007:	Uncharacterized protein	20305019	20305019	684157494	GI:684157494	GeneID:20305019	GeneID:20305019	H6BN40	H6BN40_EXODN	HMPREF1120_00380	HMPREF1120_00380	Hypothetical protein	Uncharacterized protein	XM_009154377.1	XP_009152625	XP_009152625.1	XP_009152625.1	XP_009152625.1	hypothetical protein	hypothetical protein
XP_009152628.1	5970.XP_009152628.1	https://smart.embl.de/smart/DDvec.cgi?smart=368:WD40(46|85)+WD40(90|129)+WD40(139|175)+WD40(197|236)+WD40(323|367)+	Actin-related protein 2/3 complex subunit; Functions as component of the Arp2/3 complex which is involved in regulation of actin polymerization and together with an activating nucleation-promoting factor (NPF) mediates the formation of branched actin networks	20305022	20305022	684157500	Actin like protein 2/3 complex, subunit 1A/1B	Actin-related protein 2/3 complex subunit	GI:684157500	GeneID:20305022	GeneID:20305022	H6BN43	H6BN43_EXODN	HMPREF1120_00383	HMPREF1120_00383	XM_009154380.1	XP_009152628	XP_009152628.1	XP_009152628.1	XP_009152628.1	actin like protein 2/3 complex, subunit 1A/1B	actin like protein 2/3 complex, subunit 1A/1B
XP_009152638.1	5970.XP_009152638.1	https://smart.embl.de/smart/DDvec.cgi?smart=1933:Pfam_Ecm29(23|576)+	Uncharacterized protein	20305032	20305032	684157520	GI:684157520	GeneID:20305032	GeneID:20305032	H6BN53	H6BN53_EXODN	HMPREF1120_00393	HMPREF1120_00393	Hypothetical protein	Uncharacterized protein	XM_009154390.1	XP_009152638	XP_009152638.1	XP_009152638.1	XP_009152638.1	hypothetical protein	hypothetical protein
XP_009152641.1	5970.XP_009152641.1	https://smart.embl.de/smart/DDvec.cgi?smart=195:PINc(67|166)+	rRNA-processing protein FCF1	20305035	20305035	684157526	GI:684157526	GeneID:20305035	GeneID:20305035	H6BN57	H6BN57_EXODN	HMPREF1120_00396	HMPREF1120_00396	XM_009154393.1	XP_009152641	XP_009152641.1	XP_009152641.1	XP_009152641.1	rRNA-processing protein FCF1	rRNA-processing protein FCF1	rRNA-processing protein FCF1
XP_009152642.1	5970.XP_009152642.1	https://smart.embl.de/smart/DDvec.cgi?smart=115:TRANS(20|39)+TRANS(80|99)+	Uncharacterized protein	20305036	20305036	684157528	GI:684157528	GeneID:20305036	GeneID:20305036	H6BN56	H6BN56_EXODN	HMPREF1120_00397	HMPREF1120_00397	Hypothetical protein	Uncharacterized protein	XM_009154394.1	XP_009152642	XP_009152642.1	XP_009152642.1	XP_009152642.1	hypothetical protein	hypothetical protein
XP_009152648.1	5970.XP_009152648.1	http://smart.embl.de/smart/DDt.cgi?smart=133:	Uncharacterized protein	20305042	20305042	684157540	GI:684157540	GeneID:20305042	GeneID:20305042	H6BN63	H6BN63_EXODN	HMPREF1120_00403	HMPREF1120_00403	Hypothetical protein	Uncharacterized protein	XM_009154401.1	XP_009152648	XP_009152648.1	XP_009152648.1	XP_009152648.1	XP_009152649.1	hypothetical protein	hypothetical protein
XP_009152650.1	5970.XP_009152650.1	https://smart.embl.de/smart/DDvec.cgi?smart=972:DEXDc(360|572)+RING(719|762)+HELICc(832|915)+	Adenosinetriphosphatase	20305042	20305043	20305043	684157542	684157544	858893	Adenosinetriphosphatase	Adenosinetriphosphatase	GI:684157542	GI:684157544	GeneID:20305042	GeneID:20305043	GeneID:20305043	H6BN65	H6BN65_EXODN	HMPREF1120_00404	HMPREF1120_00404	XM_009154402.1	XP_009152650	XP_009152650.1	XP_009152650.1	XP_009152650.1	adenosinetriphosphatase	adenosinetriphosphatase	taxon:858893
XP_009152651.1	5970.XP_009152651.1	https://smart.embl.de/smart/DDvec.cgi?smart=611:LRR(255|280)+LRR(361|386)+LRR(440|465)+LRR(511|536)+LRR(540|565)+	F-box and leucine-rich repeat protein 20	20305044	20305044	684157546	F-box and leucine-rich repeat protein 20	F-box and leucine-rich repeat protein 20	F-box and leucine-rich repeat protein 20	GI:684157546	GeneID:20305044	GeneID:20305044	H6BNC0	H6BNC0_EXODN	HMPREF1120_00405	HMPREF1120_00405	XM_009154403.1	XP_009152651	XP_009152651.1	XP_009152651.1	XP_009152651.1
XP_009152652.1	5970.XP_009152652.1	https://smart.embl.de/smart/DDvec.cgi?smart=1108:Pfam_MutS_I(191|317)+Pfam_MutS_II(336|499)+MUTSd(530|850)+MUTSac(867|1057)+	DNA mismatch repair protein msh3	20305045	20305045	684157548	DNA mismatch repair protein msh3	DNA mismatch repair protein msh3	DNA mismatch repair protein msh3	GI:684157548	GeneID:20305045	GeneID:20305045	H6BNC1	H6BNC1_EXODN	HMPREF1120_00406	HMPREF1120_00406	XM_009154404.1	XP_009152652	XP_009152652.1	XP_009152652.1	XP_009152652.1
XP_009152653.1	5970.XP_009152653.1	http://smart.embl.de/smart/DDt.cgi?smart=556:	Uncharacterized protein	20305046	20305046	684157550	GI:684157550	GeneID:20305046	GeneID:20305046	H6BNC2	H6BNC2_EXODN	HMPREF1120_00407	HMPREF1120_00407	Hypothetical protein	Uncharacterized protein	XM_009154405.1	XP_009152653	XP_009152653.1	XP_009152653.1	XP_009152653.1	hypothetical protein	hypothetical protein
XP_009152654.1	5970.XP_009152654.1	https://smart.embl.de/smart/DDvec.cgi?smart=342:Pfam_Prenyltrans(74|116)+Pfam_Prenyltrans(129|171)+Pfam_Prenyltrans(176|219)+Pfam_Prenyltrans(224|267)+Pfam_Prenyltrans(272|316)+	Protein geranylgeranyltransferase type II	20305047	20305047	684157552	GI:684157552	GeneID:20305047	GeneID:20305047	H6BNC3	H6BNC3_EXODN	HMPREF1120_00408	HMPREF1120_00408	Protein geranylgeranyltransferase type II	Protein geranylgeranyltransferase type II	XM_009154406.1	XP_009152654	XP_009152654.1	XP_009152654.1	XP_009152654.1	protein geranylgeranyltransferase type II	protein geranylgeranyltransferase type II
XP_009152655.1	5970.XP_009152655.1	https://smart.embl.de/smart/DDvec.cgi?smart=658:RhoGAP(376|605)+	RalA-binding protein 1	20305048	20305048	684157554	GI:684157554	GeneID:20305048	GeneID:20305048	H6BNC4	H6BNC4_EXODN	HMPREF1120_00409	HMPREF1120_00409	RalA-binding protein 1	RalA-binding protein 1	RalA-binding protein 1	XM_009154407.1	XP_009152655	XP_009152655.1	XP_009152655.1	XP_009152655.1
XP_009152662.1	5970.XP_009152662.1	https://smart.embl.de/smart/DDvec.cgi?smart=809:Pfam_MCM_N(16|195)+AAA(435|587)+	DNA helicase; Minichromosome maintenance protein 7 (cell division control protein 47); Belongs to the MCM family	20305055	20305055	684157568	DNA helicase	GI:684157568	GeneID:20305055	GeneID:20305055	H6BND1	H6BND1_EXODN	HMPREF1120_00416	HMPREF1120_00416	XM_009154414.1	XP_009152662	XP_009152662.1	XP_009152662.1	XP_009152662.1
XP_009152683.1	5970.XP_009152683.1	https://smart.embl.de/smart/DDvec.cgi?smart=166:Pfam_DUF1857(9|163)+	Uncharacterized protein	20305076	20305076	684157610	GI:684157610	GeneID:20305076	GeneID:20305076	H6BNF2	H6BNF2_EXODN	HMPREF1120_00437	HMPREF1120_00437	Hypothetical protein	Uncharacterized protein	XM_009154435.1	XP_009152683	XP_009152683.1	XP_009152683.1	XP_009152683.1	hypothetical protein	hypothetical protein
XP_009152701.1	5970.XP_009152701.1	https://smart.embl.de/smart/DDvec.cgi?smart=395:Pfam_Abhydrolase_6(127|389)+	Uncharacterized protein	20305094	20305094	684157646	GI:684157646	GeneID:20305094	GeneID:20305094	H6BNH0	H6BNH0_EXODN	HMPREF1120_00455	HMPREF1120_00455	Hypothetical protein	Uncharacterized protein	XM_009154453.1	XP_009152701	XP_009152701.1	XP_009152701.1	XP_009152701.1	hypothetical protein	hypothetical protein
XP_009152703.1	5970.XP_009152703.1	http://smart.embl.de/smart/DDt.cgi?smart=596:	Uncharacterized protein	20305096	20305096	684157650	GI:684157650	GeneID:20305096	GeneID:20305096	H6BNH2	H6BNH2_EXODN	HMPREF1120_00457	HMPREF1120_00457	Hypothetical protein	Uncharacterized protein	XM_009154455.1	XP_009152703	XP_009152703.1	XP_009152703.1	XP_009152703.1	hypothetical protein	hypothetical protein
XP_009152711.1	5970.XP_009152711.1	https://smart.embl.de/smart/DDvec.cgi?smart=710:Pfam_MFS_1(45|583)+	MFS transporter, PHS family, inorganic phosphate transporter; G2 box; other site	20305102	20305103	20305103	206648	266525	684157664	684157666	858893	CDD:206648	CDD:266525	GI:684157664	GI:684157666	GeneID:20305102	GeneID:20305103	GeneID:20305103	H6BNR5	H6BNR5_EXODN	HMPREF1120_00464	HMPREF1120_00464	XM_009154463.1	XP_009152711	XP_009152711.1	XP_009152711.1	XP_009152711.1	taxon:858893
XP_009152713.1	5970.XP_009152713.1	https://smart.embl.de/smart/DDvec.cgi?smart=517:ZnF_C2H2(69|96)+ZnF_C2H2(102|141)+	Uncharacterized protein	20305105	20305105	684157670	GI:684157670	GeneID:20305105	GeneID:20305105	H6BNR7	H6BNR7_EXODN	HMPREF1120_00466	HMPREF1120_00466	Hypothetical protein	Uncharacterized protein	XM_009154465.1	XP_009152713	XP_009152713.1	XP_009152713.1	XP_009152713.1	hypothetical protein	hypothetical protein
XP_009152718.1	5970.XP_009152718.1	https://smart.embl.de/smart/DDvec.cgi?smart=552:Pfam_Amidase(79|530)+	Amidase	20305110	20305110	684157680	Amidase	Amidase	GI:684157680	GeneID:20305110	GeneID:20305110	H6BNS2	H6BNS2_EXODN	HMPREF1120_00471	HMPREF1120_00471	XM_009154470.1	XP_009152718	XP_009152718.1	XP_009152718.1	XP_009152718.1	amidase	amidase
XP_009152748.1	5970.XP_009152748.1	https://smart.embl.de/smart/DDvec.cgi?smart=618:Pfam_HET(194|294)+	Uncharacterized protein	20305140	20305140	684157740	GI:684157740	GeneID:20305140	GeneID:20305140	H6BNV2	H6BNV2_EXODN	HMPREF1120_00501	HMPREF1120_00501	Hypothetical protein	Uncharacterized protein	XM_009154500.1	XP_009152748	XP_009152748.1	XP_009152748.1	XP_009152748.1	hypothetical protein	hypothetical protein
XP_009152770.1	5970.XP_009152770.1	https://smart.embl.de/smart/DDvec.cgi?smart=376:TRANS(96|118)+	Uncharacterized protein	20305162	20305162	684157784	GI:684157784	GeneID:20305162	GeneID:20305162	H6BJT9	H6BJT9_EXODN	HMPREF1120_00523	HMPREF1120_00523	Hypothetical protein	Uncharacterized protein	XM_009154522.1	XP_009152770	XP_009152770.1	XP_009152770.1	XP_009152770.1	hypothetical protein	hypothetical protein
XP_009152779.1	5970.XP_009152779.1	https://smart.embl.de/smart/DDvec.cgi?smart=409:SIGNAL(1|31)+TRANS(233|255)+	Uncharacterized protein	20305171	20305171	684157802	GI:684157802	GeneID:20305171	GeneID:20305171	H6BJU8	H6BJU8_EXODN	HMPREF1120_00532	HMPREF1120_00532	Hypothetical protein	Uncharacterized protein	XM_009154531.1	XP_009152779	XP_009152779.1	XP_009152779.1	XP_009152779.1	hypothetical protein	hypothetical protein
XP_009152781.1	5970.XP_009152781.1	https://smart.embl.de/smart/DDvec.cgi?smart=446:Pfam_RmlD_sub_bind(35|235)+Pfam_Epimerase(235|315)+	Sterol-4alpha-carboxylate 3-dehydrogenase (decarboxylating)	20305173	20305173	684157806	GI:684157806	GeneID:20305173	GeneID:20305173	H6BJV0	H6BJV0_EXODN	HMPREF1120_00534	HMPREF1120_00534	XM_009154533.1	XP_009152781	XP_009152781.1	XP_009152781.1	XP_009152781.1
XP_009152791.1	5970.XP_009152791.1	https://smart.embl.de/smart/DDvec.cgi?smart=488:AT_hook(53|65)+AT_hook(109|121)+AT_hook(134|146)+AT_hook(159|171)+AT_hook(185|197)+Pfam_EVE(230|389)+	Uncharacterized protein	20305183	20305183	684157826	GI:684157826	GeneID:20305183	GeneID:20305183	H6BJW0	H6BJW0_EXODN	HMPREF1120_00544	HMPREF1120_00544	Hypothetical protein	Uncharacterized protein	XM_009154543.1	XP_009152791	XP_009152791.1	XP_009152791.1	XP_009152791.1	hypothetical protein	hypothetical protein
XP_009152794.1	5970.XP_009152794.1	https://smart.embl.de/smart/DDvec.cgi?smart=306:SIGNAL(1|18)+	GPI-anchored cell wall beta-1,3-endoglucanase EglC	20305186	20305186	684157832	GI:684157832	GeneID:20305186	GeneID:20305186	H6BJW3	H6BJW3_EXODN	HMPREF1120_00547	HMPREF1120_00547	XM_009154546.1	XP_009152794	XP_009152794.1	XP_009152794.1	XP_009152794.1
XP_009152801.1	5970.XP_009152801.1	https://smart.embl.de/smart/DDvec.cgi?smart=802:Pfam_K_trans(78|672)+	Potassium uptake protein	20305193	20305193	684157846	GI:684157846	GeneID:20305193	GeneID:20305193	H6BJX0	H6BJX0_EXODN	HMPREF1120_00554	HMPREF1120_00554	Potassium uptake protein	Potassium uptake protein	XM_009154553.1	XP_009152801	XP_009152801.1	XP_009152801.1	XP_009152801.1	potassium uptake protein	potassium uptake protein
XP_009152804.1	5970.XP_009152804.1	https://smart.embl.de/smart/DDvec.cgi?smart=638:Pfam_TLD(386|577)+	Uncharacterized protein	20305196	20305196	684157852	GI:684157852	GeneID:20305196	GeneID:20305196	H6BJX3	H6BJX3_EXODN	HMPREF1120_00557	HMPREF1120_00557	Hypothetical protein	Uncharacterized protein	XM_009154556.1	XP_009152804	XP_009152804.1	XP_009152804.1	XP_009152804.1	hypothetical protein	hypothetical protein
XP_009152806.1	5970.XP_009152806.1	https://smart.embl.de/smart/DDvec.cgi?smart=826:SIGNAL(1|20)+Pfam_Kelch_5(315|364)+TRANS(497|519)+	Uncharacterized protein	20305198	20305198	684157856	GI:684157856	GeneID:20305198	GeneID:20305198	H6BJX5	H6BJX5_EXODN	HMPREF1120_00559	HMPREF1120_00559	Hypothetical protein	Uncharacterized protein	XM_009154558.1	XP_009152806	XP_009152806.1	XP_009152806.1	XP_009152806.1	hypothetical protein	hypothetical protein
XP_009152808.1	5970.XP_009152808.1	http://smart.embl.de/smart/DDt.cgi?smart=1127:	Uncharacterized protein	20305200	20305200	684157860	GI:684157860	GeneID:20305200	GeneID:20305200	H6BJX7	H6BJX7_EXODN	HMPREF1120_00561	HMPREF1120_00561	Hypothetical protein	Uncharacterized protein	XM_009154560.1	XP_009152808	XP_009152808.1	XP_009152808.1	XP_009152808.1	hypothetical protein	hypothetical protein
XP_009152826.1	5970.XP_009152826.1	https://smart.embl.de/smart/DDvec.cgi?smart=437:Pfam_MFS_1(39|334)+TRANS(340|362)+TRANS(369|391)+TRANS(406|428)+	MFS transporter, MCP family, solute carrier family 16 (monocarboxylic acid transporters), member 10	20305218	20305218	684157896	GI:684157896	GeneID:20305218	GeneID:20305218	H6BNI8	H6BNI8_EXODN	HMPREF1120_00579	HMPREF1120_00579	XM_009154578.1	XP_009152826	XP_009152826.1	XP_009152826.1	XP_009152826.1
XP_009152838.1	5970.XP_009152838.1	https://smart.embl.de/smart/DDvec.cgi?smart=571:Pfam_LigD_N(128|275)+	Uncharacterized protein	20305230	20305230	684157920	GI:684157920	GeneID:20305230	GeneID:20305230	H6BNK0	H6BNK0_EXODN	HMPREF1120_00591	HMPREF1120_00591	Hypothetical protein	Uncharacterized protein	XM_009154590.1	XP_009152838	XP_009152838.1	XP_009152838.1	XP_009152838.1	hypothetical protein	hypothetical protein
XP_009152840.1	5970.XP_009152840.1	https://smart.embl.de/smart/DDvec.cgi?smart=1624:TRANS(15|37)+TRANS(75|97)+TRANS(107|129)+TRANS(136|155)+TRANS(170|192)+TRANS(315|334)+TRANS(338|360)+Pfam_ABC_membrane(414|594)+AAA(665|950)+Pfam_ABC_membrane(984|1277)+AAA(1349|1580)+	ABC bile acid transporter	20305232	20305232	684157924	ABC bile acid transporter	ABC bile acid transporter	ABC bile acid transporter	GI:684157924	GeneID:20305232	GeneID:20305232	H6BNK2	H6BNK2_EXODN	HMPREF1120_00593	HMPREF1120_00593	XM_009154592.1	XP_009152840	XP_009152840.1	XP_009152840.1	XP_009152840.1
XP_009152849.1	5970.XP_009152849.1	https://smart.embl.de/smart/DDvec.cgi?smart=701:Pfam_GATase_7(85|208)+Pfam_SIS(381|510)+Pfam_SIS(553|684)+	Glucosamine-fructose-6-phosphate aminotransferase	20305241	20305241	684157942	GI:684157942	GeneID:20305241	GeneID:20305241	H6BNX0	H6BNX0_EXODN	HMPREF1120_00602	HMPREF1120_00602	XM_009154601.1	XP_009152849	XP_009152849.1	XP_009152849.1	XP_009152849.1
XP_009152868.1	5970.XP_009152868.1	https://smart.embl.de/smart/DDvec.cgi?smart=587:PLCXc(106|269)+PLCYc(314|432)+Pfam_C2(445|561)+	Phosphoinositide phospholipase C; CoA binding site [chemical binding]; other site	20305258	20305259	20305259	213270	223395	266508	684157978	684157980	858893	CDD:213270	CDD:223395	CDD:266508	GI:684157978	GI:684157980	GeneID:20305258	GeneID:20305259	GeneID:20305259	H6BNY9	H6BNY9_EXODN	HMPREF1120_00620	HMPREF1120_00620	Phosphoinositide phospholipase C	XM_009154620.1	XP_009152868	XP_009152868.1	XP_009152868.1	XP_009152868.1	taxon:858893
XP_009152869.1	5970.XP_009152869.1	https://smart.embl.de/smart/DDvec.cgi?smart=215:ANK(18|47)+ANK(83|112)+ANK(115|143)+ANK(160|189)+	Uncharacterized protein	20305260	20305260	684157982	GI:684157982	GeneID:20305260	GeneID:20305260	H6BNZ0	H6BNZ0_EXODN	HMPREF1120_00621	HMPREF1120_00621	Hypothetical protein	Uncharacterized protein	XM_009154621.1	XP_009152869	XP_009152869.1	XP_009152869.1	XP_009152869.1	hypothetical protein	hypothetical protein
XP_009152870.1	5970.XP_009152870.1	https://smart.embl.de/smart/DDvec.cgi?smart=169:Pfam_SnoaL(19|139)+	Uncharacterized protein	20305261	20305261	684157984	GI:684157984	GeneID:20305261	GeneID:20305261	H6BNZ1	H6BNZ1_EXODN	HMPREF1120_00622	HMPREF1120_00622	Hypothetical protein	Uncharacterized protein	XM_009154622.1	XP_009152870	XP_009152870.1	XP_009152870.1	XP_009152870.1	hypothetical protein	hypothetical protein
XP_009152872.1	5970.XP_009152872.1	https://smart.embl.de/smart/DDvec.cgi?smart=339:Pfam_Syntaxin(82|274)+Pfam_SNARE(275|334)+	Syntaxin 1B/2/3/4	20305263	20305263	684157988	GI:684157988	GeneID:20305263	GeneID:20305263	H6BNZ3	H6BNZ3_EXODN	HMPREF1120_00624	HMPREF1120_00624	Syntaxin 1B/2/3/4	Syntaxin 1B/2/3/4	XM_009154624.1	XP_009152872	XP_009152872.1	XP_009152872.1	XP_009152872.1	syntaxin 1B/2/3/4	syntaxin 1B/2/3/4
XP_009152883.1	5970.XP_009152883.1	https://smart.embl.de/smart/DDvec.cgi?smart=814:Pfam_Pkinase(179|498)+	Protein-serine/threonine kinase	20305273	20305273	684158010	GI:684158010	GeneID:20305273	GeneID:20305273	H6BP04	H6BP04_EXODN	HMPREF1120_00634	HMPREF1120_00634	Protein-serine/threonine kinase	Protein-serine/threonine kinase	XM_009154635.1	XP_009152883	XP_009152883.1	XP_009152883.1	XP_009152883.1	protein-serine/threonine kinase	protein-serine/threonine kinase
XP_009152884.1	5970.XP_009152884.1	http://smart.embl.de/smart/DDt.cgi?smart=230:	Uncharacterized protein	20305274	20305274	684158012	GI:684158012	GeneID:20305274	GeneID:20305274	H6BP05	H6BP05_EXODN	HMPREF1120_00635	HMPREF1120_00635	Hypothetical protein	Uncharacterized protein	XM_009154636.1	XP_009152884	XP_009152884.1	XP_009152884.1	XP_009152884.1	hypothetical protein	hypothetical protein
XP_009152897.1	5970.XP_009152897.1	https://smart.embl.de/smart/DDvec.cgi?smart=294:Pfam_DUF1929(190|292)+	Uncharacterized protein	20305287	20305287	684158038	GI:684158038	GeneID:20305287	GeneID:20305287	H6BJY2	H6BJY2_EXODN	HMPREF1120_00648	HMPREF1120_00648	Hypothetical protein	Uncharacterized protein	XM_009154649.1	XP_009152897	XP_009152897.1	XP_009152897.1	XP_009152897.1	hypothetical protein	hypothetical protein
XP_009152907.1	5970.XP_009152907.1	http://smart.embl.de/smart/DDt.cgi?smart=364:	Uncharacterized protein	20305297	20305297	684158058	GI:684158058	GeneID:20305297	GeneID:20305297	H6BJZ2	H6BJZ2_EXODN	HMPREF1120_00658	HMPREF1120_00658	Hypothetical protein	Uncharacterized protein	XM_009154659.1	XP_009152907	XP_009152907.1	XP_009152907.1	XP_009152907.1	hypothetical protein	hypothetical protein
XP_009152910.1	5970.XP_009152910.1	https://smart.embl.de/smart/DDvec.cgi?smart=105:Pfam_Complex1_LYR(32|91)+	Uncharacterized protein; Belongs to the complex I LYR family	20305300	20305300	684158064	GI:684158064	GeneID:20305300	GeneID:20305300	H6BJZ5	H6BJZ5_EXODN	HMPREF1120_00661	HMPREF1120_00661	Hypothetical protein	Uncharacterized protein	XM_009154662.1	XP_009152910	XP_009152910.1	XP_009152910.1	XP_009152910.1	hypothetical protein	hypothetical protein
XP_009152933.1	5970.XP_009152933.1	https://smart.embl.de/smart/DDvec.cgi?smart=751:FBOX(187|227)+LRR(304|329)+LRR(330|355)+LRR(382|407)+LRR_CC(423|448)+LRR(449|474)+LRR(475|500)+LRR(503|528)+	F-box and leucine-rich repeat protein 2	20305323	20305323	684158110	F-box and leucine-rich repeat protein 2	F-box and leucine-rich repeat protein 2	F-box and leucine-rich repeat protein 2	GI:684158110	GeneID:20305323	GeneID:20305323	H6BK18	H6BK18_EXODN	HMPREF1120_00684	HMPREF1120_00684	XM_009154685.1	XP_009152933	XP_009152933.1	XP_009152933.1	XP_009152933.1
XP_009152934.1	5970.XP_009152934.1	https://smart.embl.de/smart/DDvec.cgi?smart=1151:PAS(363|437)+Pfam_Pkinase_Tyr(887|1144)+	Protein-serine/threonine kinase	20305324	20305324	684158112	GI:684158112	GeneID:20305324	GeneID:20305324	H6BK19	H6BK19_EXODN	HMPREF1120_00685	HMPREF1120_00685	Protein-serine/threonine kinase	Protein-serine/threonine kinase	XM_009154686.1	XP_009152934	XP_009152934.1	XP_009152934.1	XP_009152934.1	protein-serine/threonine kinase	protein-serine/threonine kinase
XP_009152937.1	5970.XP_009152937.1	https://smart.embl.de/smart/DDvec.cgi?smart=110:Pfam_Yippee-Mis18(13|110)+	Protein yippee-like; Peptidylprolyl isomerase; Belongs to the yippee family	20305327	20305327	684158118	GI:684158118	GeneID:20305327	GeneID:20305327	H6BK22	H6BK22_EXODN	HMPREF1120_00688	HMPREF1120_00688	Peptidylprolyl isomerase	Protein yippee-like	XM_009154689.1	XP_009152937	XP_009152937.1	XP_009152937.1	XP_009152937.1	peptidylprolyl isomerase	peptidylprolyl isomerase
XP_009152946.1	5970.XP_009152946.1	https://smart.embl.de/smart/DDvec.cgi?smart=829:Pfam_Vac_ImportDeg(473|771)+	Uncharacterized protein	20305336	20305336	684158136	GI:684158136	GeneID:20305336	GeneID:20305336	H6BK31	H6BK31_EXODN	HMPREF1120_00697	HMPREF1120_00697	Hypothetical protein	Uncharacterized protein	XM_009154698.1	XP_009152946	XP_009152946.1	XP_009152946.1	XP_009152946.1	hypothetical protein	hypothetical protein
XP_009152952.1	5970.XP_009152952.1	https://smart.embl.de/smart/DDvec.cgi?smart=990:Pfam_Pkinase(45|319)+COIL(793|824)+	AP2-associated kinase	20305342	20305342	684158148	AP2-associated kinase	AP2-associated kinase	AP2-associated kinase	GI:684158148	GeneID:20305342	GeneID:20305342	H6BK57	H6BK57_EXODN	HMPREF1120_00703	HMPREF1120_00703	XM_009154704.1	XP_009152952	XP_009152952.1	XP_009152952.1	XP_009152952.1
XP_009152956.1	5970.XP_009152956.1	https://smart.embl.de/smart/DDvec.cgi?smart=102:Pfam_Glutaredoxin(17|79)+	Glutaredoxin 3	20305346	20305346	684158156	GI:684158156	GeneID:20305346	GeneID:20305346	Glutaredoxin 3	Glutaredoxin 3	H6BK61	H6BK61_EXODN	HMPREF1120_00707	HMPREF1120_00707	XM_009154708.1	XP_009152956	XP_009152956.1	XP_009152956.1	XP_009152956.1	glutaredoxin 3	glutaredoxin 3
XP_009152958.1	5970.XP_009152958.1	https://smart.embl.de/smart/DDvec.cgi?smart=702:DnaJ(7|68)+	Uncharacterized protein	20305348	20305348	684158160	GI:684158160	GeneID:20305348	GeneID:20305348	H6BK63	H6BK63_EXODN	HMPREF1120_00709	HMPREF1120_00709	Hypothetical protein	Uncharacterized protein	XM_009154710.1	XP_009152958	XP_009152958.1	XP_009152958.1	XP_009152958.1	hypothetical protein	hypothetical protein
XP_009152963.1	5970.XP_009152963.1	http://smart.embl.de/smart/DDt.cgi?smart=182:	Uncharacterized protein	20305353	20305353	684158170	GI:684158170	GeneID:20305353	GeneID:20305353	H6BK68	H6BK68_EXODN	HMPREF1120_00714	HMPREF1120_00714	Hypothetical protein	Uncharacterized protein	XM_009154715.1	XP_009152963	XP_009152963.1	XP_009152963.1	XP_009152963.1	hypothetical protein	hypothetical protein
XP_009152965.1	5970.XP_009152965.1	https://smart.embl.de/smart/DDvec.cgi?smart=396:Pfam_Metallophos(6|205)+	Uncharacterized protein	20305355	20305355	684158174	GI:684158174	GeneID:20305355	GeneID:20305355	H6BK70	H6BK70_EXODN	HMPREF1120_00716	HMPREF1120_00716	Hypothetical protein	Uncharacterized protein	XM_009154717.1	XP_009152965	XP_009152965.1	XP_009152965.1	XP_009152965.1	hypothetical protein	hypothetical protein
XP_009152966.1	5970.XP_009152966.1	https://smart.embl.de/smart/DDvec.cgi?smart=433:Pfam_M20_dimer(207|323)+	Acetylornithine deacetylase	20305356	20305356	684158176	Acetylornithine deacetylase	Acetylornithine deacetylase	GI:684158176	GeneID:20305356	GeneID:20305356	H6BK71	H6BK71_EXODN	HMPREF1120_00717	HMPREF1120_00717	XM_009154718.1	XP_009152966	XP_009152966.1	XP_009152966.1	XP_009152966.1	acetylornithine deacetylase	acetylornithine deacetylase
XP_009152973.1	5970.XP_009152973.1	https://smart.embl.de/smart/DDvec.cgi?smart=1196:GAL4(153|197)+Fungal_trans(416|520)+	Uncharacterized protein	20305363	20305363	684158190	GI:684158190	GeneID:20305363	GeneID:20305363	H6BK78	H6BK78_EXODN	HMPREF1120_00724	HMPREF1120_00724	Hypothetical protein	Uncharacterized protein	XM_009154725.1	XP_009152973	XP_009152973.1	XP_009152973.1	XP_009152973.1	hypothetical protein	hypothetical protein
XP_009152979.1	5970.XP_009152979.1	https://smart.embl.de/smart/DDvec.cgi?smart=419:Pfam_CoA_transf_3(44|360)+	alpha-methylacyl-CoA racemase	20305368	20305368	684158202	Alpha-methylacyl-CoA racemase	GI:684158202	GeneID:20305368	GeneID:20305368	H6BK84	H6BK84_EXODN	HMPREF1120_00729	HMPREF1120_00729	XM_009154731.1	XP_009152979	XP_009152979.1	XP_009152979.1	XP_009152979.1	alpha-methylacyl-CoA racemase	alpha-methylacyl-CoA racemase
XP_009152980.1	5970.XP_009152980.1	https://smart.embl.de/smart/DDvec.cgi?smart=549:TRANS(21|43)+Pfam_p450(54|498)+	Cytochrome P450	20305369	20305369	684158204	Cytochrome P450	Cytochrome P450	GI:684158204	GeneID:20305369	GeneID:20305369	H6BK85	H6BK85_EXODN	HMPREF1120_00730	HMPREF1120_00730	XM_009154732.1	XP_009152980	XP_009152980.1	XP_009152980.1	XP_009152980.1	cytochrome P450	cytochrome P450
XP_009152981.1	5970.XP_009152981.1	https://smart.embl.de/smart/DDvec.cgi?smart=514:TRANS(13|35)+Pfam_p450(44|506)+	Cytochrome P450 oxidoreductase	20305370	20305370	684158206	Cytochrome P450 oxidoreductase	Cytochrome P450 oxidoreductase	GI:684158206	GeneID:20305370	GeneID:20305370	H6BK86	H6BK86_EXODN	HMPREF1120_00731	HMPREF1120_00731	XM_009154733.1	XP_009152981	XP_009152981.1	XP_009152981.1	XP_009152981.1	cytochrome P450 oxidoreductase	cytochrome P450 oxidoreductase
XP_009152988.1	5970.XP_009152988.1	https://smart.embl.de/smart/DDvec.cgi?smart=686:Pfam_AMP-binding(61|507)+	fatty-acyl-CoA synthase	20305377	20305377	684158220	Fatty-acyl-CoA synthase	GI:684158220	GeneID:20305377	GeneID:20305377	H6BK93	H6BK93_EXODN	HMPREF1120_00738	HMPREF1120_00738	XM_009154740.1	XP_009152988	XP_009152988.1	XP_009152988.1	XP_009152988.1	fatty-acyl-CoA synthase	fatty-acyl-CoA synthase
XP_009152989.1	5970.XP_009152989.1	https://smart.embl.de/smart/DDvec.cgi?smart=422:Pfam_Thiolase_N(37|290)+Pfam_Thiolase_C(297|419)+	acetyl-CoA acyltransferase; Belongs to the thiolase family	20305378	20305378	684158222	Acetyl-CoA acyltransferase	GI:684158222	GeneID:20305378	GeneID:20305378	H6BK94	H6BK94_EXODN	HMPREF1120_00739	HMPREF1120_00739	XM_009154741.1	XP_009152989	XP_009152989.1	XP_009152989.1	XP_009152989.1	acetyl-CoA acyltransferase	acetyl-CoA acyltransferase
XP_009152992.1	5970.XP_009152992.1	https://smart.embl.de/smart/DDvec.cgi?smart=640:Pfam_MFS_2(86|317)+TRANS(484|506)+TRANS(510|532)+	Uncharacterized protein	20305381	20305381	684158228	GI:684158228	GeneID:20305381	GeneID:20305381	H6BK97	H6BK97_EXODN	HMPREF1120_00742	HMPREF1120_00742	Hypothetical protein	Uncharacterized protein	XM_009154744.1	XP_009152992	XP_009152992.1	XP_009152992.1	XP_009152992.1	hypothetical protein	hypothetical protein
XP_009153008.1	5970.XP_009153008.1	https://smart.embl.de/smart/DDvec.cgi?smart=157:TRANS(12|34)+	Uncharacterized protein	20305397	20305397	684158260	GI:684158260	GeneID:20305397	GeneID:20305397	H6BKB3	H6BKB3_EXODN	HMPREF1120_00758	HMPREF1120_00758	Hypothetical protein	Uncharacterized protein	XM_009154760.1	XP_009153008	XP_009153008.1	XP_009153008.1	XP_009153008.1	hypothetical protein	hypothetical protein
XP_009153009.1	5970.XP_009153009.1	https://smart.embl.de/smart/DDvec.cgi?smart=380:Pfam_R3H(76|136)+COIL(313|368)+	Uncharacterized protein	20305398	20305398	684158262	GI:684158262	GeneID:20305398	GeneID:20305398	H6BKB4	H6BKB4_EXODN	HMPREF1120_00759	HMPREF1120_00759	Hypothetical protein	Uncharacterized protein	XM_009154761.1	XP_009153009	XP_009153009.1	XP_009153009.1	XP_009153009.1	hypothetical protein	hypothetical protein
XP_009153013.1	5970.XP_009153013.1	https://smart.embl.de/smart/DDvec.cgi?smart=1250:Pfam_MutS_I(327|450)+Pfam_MutS_II(458|602)+MUTSd(637|965)+MUTSac(981|1170)+	DNA mismatch repair protein MSH6; Component of the post-replicative DNA mismatch repair system (MMR)	20305402	20305402	684158270	DNA mismatch repair protein MSH6	DNA mismatch repair protein MSH6	DNA mismatch repair protein MSH6	GI:684158270	GeneID:20305402	GeneID:20305402	H6BKB8	H6BKB8_EXODN	HMPREF1120_00763	HMPREF1120_00763	XM_009154765.1	XP_009153013	XP_009153013.1	XP_009153013.1	XP_009153013.1
XP_009153017.1	5970.XP_009153017.1	https://smart.embl.de/smart/DDvec.cgi?smart=432:Pfam_F-box-like(49|88)+	Uncharacterized protein	20305406	20305406	684158278	GI:684158278	GeneID:20305406	GeneID:20305406	H6BKC2	H6BKC2_EXODN	HMPREF1120_00767	HMPREF1120_00767	Hypothetical protein	Uncharacterized protein	XM_009154769.1	XP_009153017	XP_009153017.1	XP_009153017.1	XP_009153017.1	hypothetical protein	hypothetical protein
XP_009153019.1	5970.XP_009153019.1	https://smart.embl.de/smart/DDvec.cgi?smart=388:Pfam_Memo(5|385)+	Uncharacterized protein	20305408	20305408	684158282	GI:684158282	GeneID:20305408	GeneID:20305408	H6BKC4	H6BKC4_EXODN	HMPREF1120_00769	HMPREF1120_00769	Hypothetical protein	Uncharacterized protein	XM_009154771.1	XP_009153019	XP_009153019.1	XP_009153019.1	XP_009153019.1	hypothetical protein	hypothetical protein
XP_009153020.1	5970.XP_009153020.1	http://smart.embl.de/smart/DDt.cgi?smart=241:	Uncharacterized protein	20305409	20305409	684158284	GI:684158284	GeneID:20305409	GeneID:20305409	H6BKC5	H6BKC5_EXODN	HMPREF1120_00770	HMPREF1120_00770	Hypothetical protein	Uncharacterized protein	XM_009154772.1	XP_009153020	XP_009153020.1	XP_009153020.1	XP_009153020.1	hypothetical protein	hypothetical protein
XP_009153021.1	5970.XP_009153021.1	http://smart.embl.de/smart/DDt.cgi?smart=526:	Uncharacterized protein	20305410	20305410	684158286	GI:684158286	GeneID:20305410	GeneID:20305410	H6BKC6	H6BKC6_EXODN	HMPREF1120_00771	HMPREF1120_00771	Hypothetical protein	Uncharacterized protein	XM_009154773.1	XP_009153021	XP_009153021.1	XP_009153021.1	XP_009153021.1	hypothetical protein	hypothetical protein
XP_009153035.1	5970.XP_009153035.1	https://smart.embl.de/smart/DDvec.cgi?smart=1092:SIGNAL(1|23)+EGF(52|85)+TRANS(316|338)+AAA(396|591)+Pfam_ABC2_membrane(817|1030)+TRANS(1067|1089)+	ATP-binding cassette, subfamily G (WHITE), member 2	20305424	20305424	684158314	GI:684158314	GeneID:20305424	GeneID:20305424	H6BKE0	H6BKE0_EXODN	HMPREF1120_00785	HMPREF1120_00785	XM_009154787.1	XP_009153035	XP_009153035.1	XP_009153035.1	XP_009153035.1
XP_009153041.1	5970.XP_009153041.1	https://smart.embl.de/smart/DDvec.cgi?smart=901:CULLIN(573|721)+Cullin_Nedd8(830|897)+	Cullin 4; Belongs to the cullin family	20305430	20305430	684158326	Cullin 4	Cullin 4	Cullin 4	GI:684158326	GeneID:20305430	GeneID:20305430	H6BKE6	H6BKE6_EXODN	HMPREF1120_00791	HMPREF1120_00791	XM_009154793.1	XP_009153041	XP_009153041.1	XP_009153041.1	XP_009153041.1
XP_009153042.1	5970.XP_009153042.1	https://smart.embl.de/smart/DDvec.cgi?smart=133:Pfam_Rep_fac-A_3(1|120)+	Uncharacterized protein	20305431	20305431	684158328	GI:684158328	GeneID:20305431	GeneID:20305431	H6BKE7	H6BKE7_EXODN	HMPREF1120_00792	HMPREF1120_00792	Hypothetical protein	Uncharacterized protein	XM_009154794.1	XP_009153042	XP_009153042.1	XP_009153042.1	XP_009153042.1	hypothetical protein	hypothetical protein
XP_009153045.1	5970.XP_009153045.1	https://smart.embl.de/smart/DDvec.cgi?smart=592:Pfam_Dak1(19|352)+Dak2(415|590)+	Dihydroxyacetone kinase	20305434	20305434	684158334	Dihydroxyacetone kinase	Dihydroxyacetone kinase	GI:684158334	GeneID:20305434	GeneID:20305434	H6BKF0	H6BKF0_EXODN	HMPREF1120_00795	HMPREF1120_00795	XM_009154797.1	XP_009153045	XP_009153045.1	XP_009153045.1	XP_009153045.1	dihydroxyacetone kinase	dihydroxyacetone kinase
XP_009153046.1	5970.XP_009153046.1	https://smart.embl.de/smart/DDvec.cgi?smart=1350:UBA(343|380)+RWD(402|501)+DEXDc(574|769)+HELICc(843|943)+HA2(1006|1097)+Pfam_OB_NTP_bind(1180|1281)+	DEAD/DEAH box helicase	20305435	20305435	684158336	DEAD/DEAH box helicase	DEAD/DEAH box helicase	DEAD/DEAH box helicase	GI:684158336	GeneID:20305435	GeneID:20305435	H6BKF1	H6BKF1_EXODN	HMPREF1120_00796	HMPREF1120_00796	XM_009154798.1	XP_009153046	XP_009153046.1	XP_009153046.1	XP_009153046.1
XP_009153052.1	5970.XP_009153052.1	https://smart.embl.de/smart/DDvec.cgi?smart=1240:Pfam_STAG(227|340)+COIL(1192|1222)+	Cohesin complex subunit SCC3	20305441	20305441	684158348	Cohesin complex subunit SCC3	Cohesin complex subunit SCC3	GI:684158348	GeneID:20305441	GeneID:20305441	H6BKF7	H6BKF7_EXODN	HMPREF1120_00802	HMPREF1120_00802	XM_009154804.1	XP_009153052	XP_009153052.1	XP_009153052.1	XP_009153052.1	cohesin complex subunit SCC3	cohesin complex subunit SCC3
XP_009153065.1	5970.XP_009153065.1	https://smart.embl.de/smart/DDvec.cgi?smart=213:Pfam_Abhydrolase_3(4|189)+	Triacylglycerol lipase	20305454	20305454	684158374	GI:684158374	GeneID:20305454	GeneID:20305454	H6BKH0	H6BKH0_EXODN	HMPREF1120_00815	HMPREF1120_00815	Triacylglycerol lipase	Triacylglycerol lipase	XM_009154817.1	XP_009153065	XP_009153065.1	XP_009153065.1	XP_009153065.1	triacylglycerol lipase	triacylglycerol lipase
NBP35	5970.XP_009153069.1	https://smart.embl.de/smart/DDvec.cgi?smart=342:Pfam_CbiA(79|305)+	Cytosolic Fe-S cluster assembly factor NBP35; Component of the cytosolic iron-sulfur (Fe/S) protein assembly (CIA) machinery. Required for maturation of extramitochondrial Fe-S proteins. The NBP35-CFD1 heterotetramer forms a Fe-S scaffold complex, mediating the de novo assembly of an Fe-S cluster and its transfer to target apoproteins; Belongs to the Mrp/NBP35 ATP-binding proteins family. NUBP1/N…	20305458	20305458	684158382	Cytosolic Fe-S cluster assembly factor NBP35	Cytosolic Fe-S cluster assembly factor nbp35	GI:684158382	GeneID:20305458	GeneID:20305458	H6BKH4	H6BKH4_EXODN	HMPREF1120_00819	HMPREF1120_00819	NBP35	Nucleotide-binding protein 35	XM_009154821.1	XP_009153069	XP_009153069.1	XP_009153069.1	XP_009153069.1	cytosolic Fe-S cluster assembly factor nbp35	cytosolic Fe-S cluster assembly factor nbp35
XP_009153089.1	5970.XP_009153089.1	http://smart.embl.de/smart/DDt.cgi?smart=755:	Uncharacterized protein	20305477	20305477	684158422	GI:684158422	GeneID:20305477	GeneID:20305477	H6BKJ5	H6BKJ5_EXODN	HMPREF1120_00838	HMPREF1120_00838	Hypothetical protein	Uncharacterized protein	XM_009154842.1	XP_009153089	XP_009153089.1	XP_009153089.1	XP_009153089.1	XP_009153090.1	hypothetical protein	hypothetical protein
XP_009153098.1	5970.XP_009153098.1	https://smart.embl.de/smart/DDvec.cgi?smart=756:GAL4(36|80)+Pfam_Fungal_trans_2(295|756)+	Uncharacterized protein	20305485	20305485	684158440	GI:684158440	GeneID:20305485	GeneID:20305485	H6BKK3	H6BKK3_EXODN	HMPREF1120_00846	HMPREF1120_00846	Hypothetical protein	Uncharacterized protein	XM_009154850.1	XP_009153098	XP_009153098.1	XP_009153098.1	XP_009153098.1	hypothetical protein	hypothetical protein
XP_009153104.1	5970.XP_009153104.1	https://smart.embl.de/smart/DDvec.cgi?smart=671:FBOX(6|46)+	Uncharacterized protein	20305491	20305491	684158452	GI:684158452	GeneID:20305491	GeneID:20305491	H6BKK9	H6BKK9_EXODN	HMPREF1120_00852	HMPREF1120_00852	Hypothetical protein	Uncharacterized protein	XM_009154856.1	XP_009153104	XP_009153104.1	XP_009153104.1	XP_009153104.1	hypothetical protein	hypothetical protein
XP_009153105.1	5970.XP_009153105.1	https://smart.embl.de/smart/DDvec.cgi?smart=640:Pfam_DUF3955(60|117)+Pfam_EamA(213|294)+TRANS(327|349)+TRANS(362|384)+TRANS(399|421)+TRANS(428|450)+TRANS(454|471)+	Uncharacterized protein	20305492	20305492	684158454	GI:684158454	GeneID:20305492	GeneID:20305492	H6BKL0	H6BKL0_EXODN	HMPREF1120_00853	HMPREF1120_00853	Hypothetical protein	Uncharacterized protein	XM_009154857.1	XP_009153105	XP_009153105.1	XP_009153105.1	XP_009153105.1	hypothetical protein	hypothetical protein
XP_009153115.1	5970.XP_009153115.1	https://smart.embl.de/smart/DDvec.cgi?smart=523:COIL(331|359)+	Uncharacterized protein	20305502	20305502	684158474	GI:684158474	GeneID:20305502	GeneID:20305502	H6BKM0	H6BKM0_EXODN	HMPREF1120_00863	HMPREF1120_00863	Hypothetical protein	Uncharacterized protein	XM_009154867.1	XP_009153115	XP_009153115.1	XP_009153115.1	XP_009153115.1	hypothetical protein	hypothetical protein
XP_009153125.1	5970.XP_009153125.1	https://smart.embl.de/smart/DDvec.cgi?smart=417:Pfam_Ribonuc_red_sm(91|359)+	Ribonucleoside-diphosphate reductase small chain	20305512	20305512	684158494	GI:684158494	GeneID:20305512	GeneID:20305512	H6BKN0	H6BKN0_EXODN	HMPREF1120_00873	HMPREF1120_00873	Ribonucleoside-diphosphate reductase small chain	Ribonucleoside-diphosphate reductase small chain	XM_009154877.1	XP_009153125	XP_009153125.1	XP_009153125.1	XP_009153125.1	ribonucleoside-diphosphate reductase small chain	ribonucleoside-diphosphate reductase small chain
XP_009153134.1	5970.XP_009153134.1	http://smart.embl.de/smart/DDt.cgi?smart=608:	Uncharacterized protein	20305521	20305521	684158512	GI:684158512	GeneID:20305521	GeneID:20305521	H6BKN9	H6BKN9_EXODN	HMPREF1120_00882	HMPREF1120_00882	Hypothetical protein	Uncharacterized protein	XM_009154886.1	XP_009153134	XP_009153134.1	XP_009153134.1	XP_009153134.1	hypothetical protein	hypothetical protein
XP_009153141.1	5970.XP_009153141.1	http://smart.embl.de/smart/DDt.cgi?smart=127:	Uncharacterized protein	20305528	20305528	684158526	GI:684158526	GeneID:20305528	GeneID:20305528	H6BKP6	H6BKP6_EXODN	HMPREF1120_00889	HMPREF1120_00889	Hypothetical protein	Uncharacterized protein	XM_009154893.1	XP_009153141	XP_009153141.1	XP_009153141.1	XP_009153141.1	hypothetical protein	hypothetical protein
XP_009153142.1	5970.XP_009153142.1	https://smart.embl.de/smart/DDvec.cgi?smart=834:WD40(91|134)+WD40(166|204)+WD40(207|246)+WD40(248|287)+WD40(347|388)+WD40(398|511)+	Glucose repression regulatory protein TUP1	20305529	20305529	684158528	GI:684158528	GeneID:20305529	GeneID:20305529	Glucose repression regulatory protein TUP1	Glucose repression regulatory protein TUP1	H6BKP7	H6BKP7_EXODN	HMPREF1120_00890	HMPREF1120_00890	XM_009154894.1	XP_009153142	XP_009153142.1	XP_009153142.1	XP_009153142.1	glucose repression regulatory protein TUP1	glucose repression regulatory protein TUP1
XP_009153148.1	5970.XP_009153148.1	https://smart.embl.de/smart/DDvec.cgi?smart=487:ZnF_GATA(94|144)+ZnF_GATA(264|314)+COIL(459|487)+	GATA-binding protein	20305535	20305535	684158540	GATA-binding protein	GATA-binding protein	GATA-binding protein	GI:684158540	GeneID:20305535	GeneID:20305535	H6BKQ3	H6BKQ3_EXODN	HMPREF1120_00896	HMPREF1120_00896	XM_009154900.1	XP_009153148	XP_009153148.1	XP_009153148.1	XP_009153148.1
XP_009153153.1	5970.XP_009153153.1	https://smart.embl.de/smart/DDvec.cgi?smart=331:ANK(52|81)+ANK(85|117)+ANK(121|151)+ANK(155|184)+ANK(188|217)+ANK(222|250)+	Ankyrin	20305540	20305540	684158550	Ankyrin	Ankyrin	GI:684158550	GeneID:20305540	GeneID:20305540	H6BKQ8	H6BKQ8_EXODN	HMPREF1120_00901	HMPREF1120_00901	XM_009154905.1	XP_009153153	XP_009153153.1	XP_009153153.1	XP_009153153.1	ankyrin	ankyrin
XP_009153154.1	5970.XP_009153154.1	http://smart.embl.de/smart/DDt.cgi?smart=367:	Uncharacterized protein	20305541	20305541	684158552	GI:684158552	GeneID:20305541	GeneID:20305541	H6BKQ9	H6BKQ9_EXODN	HMPREF1120_00902	HMPREF1120_00902	Hypothetical protein	Uncharacterized protein	XM_009154906.1	XP_009153154	XP_009153154.1	XP_009153154.1	XP_009153154.1	hypothetical protein	hypothetical protein
XP_009153156.1	5970.XP_009153156.1	https://smart.embl.de/smart/DDvec.cgi?smart=436:Pfam_DAO(9|380)+	Oxygen oxidoreductase	20305543	20305543	684158556	GI:684158556	GeneID:20305543	GeneID:20305543	H6BKR1	H6BKR1_EXODN	HMPREF1120_00904	HMPREF1120_00904	Oxygen oxidoreductase	Oxygen oxidoreductase	XM_009154908.1	XP_009153156	XP_009153156.1	XP_009153156.1	XP_009153156.1	oxygen oxidoreductase	oxygen oxidoreductase
XP_009153157.1	5970.XP_009153157.1	https://smart.embl.de/smart/DDvec.cgi?smart=365:Pfam_ApbA(12|171)+Pfam_ApbA_C(218|343)+	2-dehydropantoate 2-reductase	2-dehydropantoate 2-reductase	2-dehydropantoate 2-reductase	2-dehydropantoate 2-reductase	20305544	20305544	684158558	GI:684158558	GeneID:20305544	GeneID:20305544	H6BKR2	H6BKR2_EXODN	HMPREF1120_00905	HMPREF1120_00905	XM_009154909.1	XP_009153157	XP_009153157.1	XP_009153157.1	XP_009153157.1
XP_009153158.1	5970.XP_009153158.1	https://smart.embl.de/smart/DDvec.cgi?smart=558:Pfam_AA_permease(57|519)+	AAT family amino acid transporter	20305545	20305545	684158560	AAT family amino acid transporter	AAT family amino acid transporter	AAT family amino acid transporter	GI:684158560	GeneID:20305545	GeneID:20305545	H6BKR3	H6BKR3_EXODN	HMPREF1120_00906	HMPREF1120_00906	XM_009154910.1	XP_009153158	XP_009153158.1	XP_009153158.1	XP_009153158.1
XP_009153176.1	5970.XP_009153176.1	https://smart.embl.de/smart/DDvec.cgi?smart=655:Pfam_GTP_EFTU(192|424)+Pfam_GTP_EFTU_D2(440|511)+	Elongation factor EF-1 alpha subunit	20305563	20305563	684158596	Elongation factor EF-1 alpha subunit	Elongation factor EF-1 alpha subunit	GI:684158596	GeneID:20305563	GeneID:20305563	H6BKT1	H6BKT1_EXODN	HMPREF1120_00924	HMPREF1120_00924	XM_009154928.1	XP_009153176	XP_009153176.1	XP_009153176.1	XP_009153176.1	elongation factor EF-1 alpha subunit	elongation factor EF-1 alpha subunit
XP_009153183.1	5970.XP_009153183.1	https://smart.embl.de/smart/DDvec.cgi?smart=1151:ZnF_C2H2(56|78)+ZnF_C2H2(84|107)+Pfam_Fungal_trans(518|866)+	Zinc finger protein ADR1	20305570	20305570	684158610	GI:684158610	GeneID:20305570	GeneID:20305570	H6BKT8	H6BKT8_EXODN	HMPREF1120_00931	HMPREF1120_00931	XM_009154935.1	XP_009153183	XP_009153183.1	XP_009153183.1	XP_009153183.1	Zinc finger protein ADR1	Zinc finger protein ADR1	zinc finger protein ADR1	zinc finger protein ADR1
XP_009153185.1	5970.XP_009153185.1	https://smart.embl.de/smart/DDvec.cgi?smart=642:Pfam_POT1(10|162)+Pfam_POT1PC(201|354)+	Uncharacterized protein	20305572	20305572	684158614	GI:684158614	GeneID:20305572	GeneID:20305572	H6BKU0	H6BKU0_EXODN	HMPREF1120_00933	HMPREF1120_00933	Hypothetical protein	Uncharacterized protein	XM_009154937.1	XP_009153185	XP_009153185.1	XP_009153185.1	XP_009153185.1	hypothetical protein	hypothetical protein
XP_009153205.1	5970.XP_009153205.1	https://smart.embl.de/smart/DDvec.cgi?smart=349:Pfam_Pkinase_Tyr(18|182)+	Casein kinase 1; Belongs to the protein kinase superfamily	20305592	20305592	684158654	Casein kinase 1	Casein kinase 1	GI:684158654	GeneID:20305592	GeneID:20305592	H6BKW0	H6BKW0_EXODN	HMPREF1120_00953	HMPREF1120_00953	XM_009154957.1	XP_009153205	XP_009153205.1	XP_009153205.1	XP_009153205.1	casein kinase 1	casein kinase 1
XP_009153206.1	5970.XP_009153206.1	http://smart.embl.de/smart/DDt.cgi?smart=542:	Uncharacterized protein	20305593	20305593	684158656	GI:684158656	GeneID:20305593	GeneID:20305593	H6BKW1	H6BKW1_EXODN	HMPREF1120_00954	HMPREF1120_00954	Hypothetical protein	Uncharacterized protein	XM_009154958.1	XP_009153206	XP_009153206.1	XP_009153206.1	XP_009153206.1	hypothetical protein	hypothetical protein
XP_009153215.1	5970.XP_009153215.1	http://smart.embl.de/smart/DDt.cgi?smart=290:	Uncharacterized protein	20305602	20305602	684158674	GI:684158674	GeneID:20305602	GeneID:20305602	H6BKX0	H6BKX0_EXODN	HMPREF1120_00963	HMPREF1120_00963	Hypothetical protein	Uncharacterized protein	XM_009154967.1	XP_009153215	XP_009153215.1	XP_009153215.1	XP_009153215.1	hypothetical protein	hypothetical protein
XP_009153218.1	5970.XP_009153218.1	https://smart.embl.de/smart/DDvec.cgi?smart=481:RRM(82|158)+RRM(176|249)+RRM(302|369)+	Nucleolin	20305605	20305605	684158680	GI:684158680	GeneID:20305605	GeneID:20305605	H6BL09	H6BL09_EXODN	HMPREF1120_00966	HMPREF1120_00966	Nucleolin	Nucleolin	XM_009154970.1	XP_009153218	XP_009153218.1	XP_009153218.1	XP_009153218.1	nucleolin	nucleolin
XP_009153229.1	5970.XP_009153229.1	https://smart.embl.de/smart/DDvec.cgi?smart=611:SIGNAL(1|23)+Pfam_Peptidase_S10(36|458)+TRANS(515|532)+	Carboxypeptidase D; Belongs to the peptidase S10 family	20305616	20305616	684158702	Carboxypeptidase D	Carboxypeptidase D	GI:684158702	GeneID:20305616	GeneID:20305616	H6BL20	H6BL20_EXODN	HMPREF1120_00977	HMPREF1120_00977	XM_009154981.1	XP_009153229	XP_009153229.1	XP_009153229.1	XP_009153229.1	carboxypeptidase D	carboxypeptidase D
XP_009153230.1	5970.XP_009153230.1	http://smart.embl.de/smart/DDt.cgi?smart=547:	Uncharacterized protein	20305617	20305617	684158704	GI:684158704	GeneID:20305617	GeneID:20305617	H6BL21	H6BL21_EXODN	HMPREF1120_00978	HMPREF1120_00978	Hypothetical protein	Uncharacterized protein	XM_009154982.1	XP_009153230	XP_009153230.1	XP_009153230.1	XP_009153230.1	hypothetical protein	hypothetical protein
XP_009153236.1	5970.XP_009153236.1	https://smart.embl.de/smart/DDvec.cgi?smart=1033:Pfam_E1_FCCH(201|271)+Pfam_E1_4HB(272|341)+Pfam_UBA_e1_thiolCys(611|861)+UBA_e1_C(899|1027)+	Ubiquitin-activating enzyme E1 1; Spc97 / Spc98 family; Region: Spc97_Spc98; pfam04130; Belongs to the ubiquitin-activating E1 family	20305621	20305622	20305622	252397	684158714	684158716	858893	CDD:252397	GI:684158714	GI:684158716	GeneID:20305621	GeneID:20305622	GeneID:20305622	H6BL27	H6BL27_EXODN	HMPREF1120_00983	HMPREF1120_00983	Ubiquitin-activating enzyme E1 1	Ubiquitin-activating enzyme E1 1	XM_009154988.1	XP_009153236	XP_009153236.1	XP_009153236.1	XP_009153236.1	taxon:858893	ubiquitin-activating enzyme E1 1	ubiquitin-activating enzyme E1 1
XP_009153237.1	5970.XP_009153237.1	https://smart.embl.de/smart/DDvec.cgi?smart=361:SIGNAL(1|33)+Pfam_GST_N_2(81|184)+Pfam_GST_C_2(231|307)+	Glutathione S-transferase	20305623	20305623	684158718	GI:684158718	GeneID:20305623	GeneID:20305623	Glutathione S-transferase	Glutathione S-transferase	H6BL28	H6BL28_EXODN	HMPREF1120_00984	HMPREF1120_00984	XM_009154989.1	XP_009153237	XP_009153237.1	XP_009153237.1	XP_009153237.1	glutathione S-transferase	glutathione S-transferase
XP_009153256.1	5970.XP_009153256.1	https://smart.embl.de/smart/DDvec.cgi?smart=208:Pfam_Isochorismatase(5|91)+Pfam_Isochorismatase(101|203)+	Uncharacterized protein	20305641	20305641	684158756	GI:684158756	GeneID:20305641	GeneID:20305641	H6BL47	H6BL47_EXODN	HMPREF1120_01002	HMPREF1120_01002	Hypothetical protein	Uncharacterized protein	XM_009155008.1	XP_009153256	XP_009153256.1	XP_009153256.1	XP_009153256.1	hypothetical protein	hypothetical protein
XP_009153266.1	5970.XP_009153266.1	https://smart.embl.de/smart/DDvec.cgi?smart=527:Pfam_p450(48|502)+	3-hydroxyphenylacetate 6-hydroxylase	20305651	20305651	3-hydroxyphenylacetate 6-hydroxylase	3-hydroxyphenylacetate 6-hydroxylase	3-hydroxyphenylacetate 6-hydroxylase	684158776	GI:684158776	GeneID:20305651	GeneID:20305651	H6BL57	H6BL57_EXODN	HMPREF1120_01012	HMPREF1120_01012	XM_009155018.1	XP_009153266	XP_009153266.1	XP_009153266.1	XP_009153266.1
XP_009153269.1	5970.XP_009153269.1	https://smart.embl.de/smart/DDvec.cgi?smart=411:Pfam_DUF4243(59|375)+	Uncharacterized protein	20305654	20305654	684158782	GI:684158782	GeneID:20305654	GeneID:20305654	H6BL60	H6BL60_EXODN	HMPREF1120_01015	HMPREF1120_01015	Hypothetical protein	Uncharacterized protein	XM_009155021.1	XP_009153269	XP_009153269.1	XP_009153269.1	XP_009153269.1	hypothetical protein	hypothetical protein
XP_009153274.1	5970.XP_009153274.1	http://smart.embl.de/smart/DDt.cgi?smart=449:	Uncharacterized protein	20305659	20305659	684158792	GI:684158792	GeneID:20305659	GeneID:20305659	H6BLC0	H6BLC0_EXODN	HMPREF1120_01020	HMPREF1120_01020	Hypothetical protein	Uncharacterized protein	XM_009155026.1	XP_009153274	XP_009153274.1	XP_009153274.1	XP_009153274.1	hypothetical protein	hypothetical protein
XP_009153276.1	5970.XP_009153276.1	http://smart.embl.de/smart/DDt.cgi?smart=92:	Uncharacterized protein	20305661	20305661	684158796	GI:684158796	GeneID:20305661	GeneID:20305661	H6BLC2	H6BLC2_EXODN	HMPREF1120_01022	HMPREF1120_01022	Hypothetical protein	Uncharacterized protein	XM_009155028.1	XP_009153276	XP_009153276.1	XP_009153276.1	XP_009153276.1	hypothetical protein	hypothetical protein
XP_009153277.1	5970.XP_009153277.1	https://smart.embl.de/smart/DDvec.cgi?smart=1228:COIL(80|106)+S1(254|327)+COIL(467|496)+DEXDc(562|746)+HELICc(790|894)+HA2(955|1045)+Pfam_OB_NTP_bind(1102|1179)+	Adenosinetriphosphatase	20305662	20305662	684158798	Adenosinetriphosphatase	Adenosinetriphosphatase	GI:684158798	GeneID:20305662	GeneID:20305662	H6BLC3	H6BLC3_EXODN	HMPREF1120_01023	HMPREF1120_01023	XM_009155029.1	XP_009153277	XP_009153277.1	XP_009153277.1	XP_009153277.1	adenosinetriphosphatase	adenosinetriphosphatase
XP_009153283.1	5970.XP_009153283.1	https://smart.embl.de/smart/DDvec.cgi?smart=284:Pfam_RPA_C(178|277)+	Replication factor A2	20305668	20305668	684158810	GI:684158810	GeneID:20305668	GeneID:20305668	H6BLC9	H6BLC9_EXODN	HMPREF1120_01029	HMPREF1120_01029	Replication factor A2	Replication factor A2	XM_009155035.1	XP_009153283	XP_009153283.1	XP_009153283.1	XP_009153283.1	replication factor A2	replication factor A2
XP_009153284.1	5970.XP_009153284.1	https://smart.embl.de/smart/DDvec.cgi?smart=1124:Pfam_TPR_10(876|917)+Pfam_TPR_10(960|1000)+Pfam_TPR_12(1003|1077)+	Uncharacterized protein	20305669	20305669	684158812	GI:684158812	GeneID:20305669	GeneID:20305669	H6BLD0	H6BLD0_EXODN	HMPREF1120_01030	HMPREF1120_01030	Hypothetical protein	Uncharacterized protein	XM_009155036.1	XP_009153284	XP_009153284.1	XP_009153284.1	XP_009153284.1	hypothetical protein	hypothetical protein
XP_009153287.1	5970.XP_009153287.1	https://smart.embl.de/smart/DDvec.cgi?smart=622:TRANS(32|54)+TRANS(69|91)+Pfam_DHHC(141|270)+	Palmitoyltransferase; Belongs to the DHHC palmitoyltransferase family	20305672	20305672	684158818	GI:684158818	GeneID:20305672	GeneID:20305672	H6BLD3	H6BLD3_EXODN	HMPREF1120_01033	HMPREF1120_01033	Hypothetical protein	Palmitoyltransferase	XM_009155039.1	XP_009153287	XP_009153287.1	XP_009153287.1	XP_009153287.1	hypothetical protein	hypothetical protein
XP_009153296.1	5970.XP_009153296.1	https://smart.embl.de/smart/DDvec.cgi?smart=1107:POLBc(306|765)+Pfam_zf-C4pol(1008|1082)+	DNA polymerase delta subunit 1	20305681	20305681	684158836	DNA polymerase	DNA polymerase delta subunit 1	DNA polymerase delta subunit 1	GI:684158836	GeneID:20305681	GeneID:20305681	H6BLE2	H6BLE2_EXODN	HMPREF1120_01042	HMPREF1120_01042	XM_009155048.1	XP_009153296	XP_009153296.1	XP_009153296.1	XP_009153296.1
XP_009153309.1	5970.XP_009153309.1	https://smart.embl.de/smart/DDvec.cgi?smart=169:Pfam_Pmp3(5|54)+	Uncharacterized protein	20305694	20305694	684158862	GI:684158862	GeneID:20305694	GeneID:20305694	H6BLF5	H6BLF5_EXODN	HMPREF1120_01055	HMPREF1120_01055	Hypothetical protein	Uncharacterized protein	XM_009155061.1	XP_009153309	XP_009153309.1	XP_009153309.1	XP_009153309.1	hypothetical protein	hypothetical protein
XP_009153315.1	5970.XP_009153315.1	https://smart.embl.de/smart/DDvec.cgi?smart=439:ACTIN(5|432)+	Actin-like protein 3; Belongs to the actin family	20305700	20305700	684158874	Actin-like protein 3	Actin-like protein 3	GI:684158874	GeneID:20305700	GeneID:20305700	H6BLG1	H6BLG1_EXODN	HMPREF1120_01061	HMPREF1120_01061	XM_009155067.1	XP_009153315	XP_009153315.1	XP_009153315.1	XP_009153315.1	actin-like protein 3	actin-like protein 3
XP_009153316.1	5970.XP_009153316.1	https://smart.embl.de/smart/DDvec.cgi?smart=525:Pfam_Asparaginase_2(12|198)+Pfam_Asparaginase_2(282|485)+	Taspase, threonine aspartase, 1	20305701	20305701	684158876	GI:684158876	GeneID:20305701	GeneID:20305701	H6BLG2	H6BLG2_EXODN	HMPREF1120_01062	HMPREF1120_01062	Taspase, threonine aspartase, 1	Taspase, threonine aspartase, 1	XM_009155068.1	XP_009153316	XP_009153316.1	XP_009153316.1	XP_009153316.1	taspase, threonine aspartase, 1	taspase, threonine aspartase, 1
XP_009153318.1	5970.XP_009153318.1	https://smart.embl.de/smart/DDvec.cgi?smart=867:Pfam_UNC45-central(231|382)+ARM(434|477)+ARM(609|657)+ARM(801|843)+	DNA ligase (ATP)	20305703	20305703	684158880	DNA ligase (ATP)	DNA ligase (ATP)	DNA ligase (ATP)	GI:684158880	GeneID:20305703	GeneID:20305703	H6BLG4	H6BLG4_EXODN	HMPREF1120_01064	HMPREF1120_01064	XM_009155070.1	XP_009153318	XP_009153318.1	XP_009153318.1	XP_009153318.1
XP_009153321.1	5970.XP_009153321.1	https://smart.embl.de/smart/DDvec.cgi?smart=1207:Pfam_LCM(13|217)+Pfam_Kelch_4(432|478)+Pfam_Cupin_8(757|1107)+	Uncharacterized protein	20305706	20305706	684158886	GI:684158886	GeneID:20305706	GeneID:20305706	H6BLG8	H6BLG8_EXODN	HMPREF1120_01067	HMPREF1120_01067	Hypothetical protein	Uncharacterized protein	XM_009155073.1	XP_009153321	XP_009153321.1	XP_009153321.1	XP_009153321.1	hypothetical protein	hypothetical protein
XP_009153323.1	5970.XP_009153323.1	https://smart.embl.de/smart/DDvec.cgi?smart=689:DSPc(511|657)+	Protein-tyrosine phosphatase; Cupin-like domain; Region: Cupin_8; cl19305	20305706	20305707	20305707	257743	261364	684158888	684158890	858893	CDD:257743	CDD:261364	GI:684158888	GI:684158890	GeneID:20305706	GeneID:20305707	GeneID:20305707	H6BLG7	H6BLG7_EXODN	HMPREF1120_01068	HMPREF1120_01068	Protein-tyrosine phosphatase	Protein-tyrosine phosphatase	XM_009155075.1	XP_009153323	XP_009153323.1	XP_009153323.1	XP_009153323.1	protein-tyrosine phosphatase	protein-tyrosine phosphatase	taxon:858893
XP_009153328.1	5970.XP_009153328.1	https://smart.embl.de/smart/DDvec.cgi?smart=906:COIL(47|79)+Pfam_PC_rep(492|526)+Pfam_PC_rep(720|753)+	26S proteasome regulatory subunit rpn-1	20305712	20305712	26S proteasome regulatory subunit rpn-1	26S proteasome regulatory subunit rpn-1	26S proteasome regulatory subunit rpn-1	684158900	GI:684158900	GeneID:20305712	GeneID:20305712	H6BLM8	H6BLM8_EXODN	HMPREF1120_01073	HMPREF1120_01073	XM_009155080.1	XP_009153328	XP_009153328.1	XP_009153328.1	XP_009153328.1
XP_009153329.1	5970.XP_009153329.1	https://smart.embl.de/smart/DDvec.cgi?smart=598:Pfam_MFS_1(75|542)+TRANS(564|586)+	Uncharacterized protein	20305713	20305713	684158902	GI:684158902	GeneID:20305713	GeneID:20305713	H6BLM9	H6BLM9_EXODN	HMPREF1120_01074	HMPREF1120_01074	Hypothetical protein	Uncharacterized protein	XM_009155081.1	XP_009153329	XP_009153329.1	XP_009153329.1	XP_009153329.1	hypothetical protein	hypothetical protein
XP_009153333.1	5970.XP_009153333.1	https://smart.embl.de/smart/DDvec.cgi?smart=320:Pfam_adh_short(23|173)+	Short-chain dehydrogenase	20305717	20305717	684158910	GI:684158910	GeneID:20305717	GeneID:20305717	H6BLN3	H6BLN3_EXODN	HMPREF1120_01078	HMPREF1120_01078	Short-chain dehydrogenase	Short-chain dehydrogenase	XM_009155085.1	XP_009153333	XP_009153333.1	XP_009153333.1	XP_009153333.1	short-chain dehydrogenase	short-chain dehydrogenase
XP_009153337.1	5970.XP_009153337.1	http://smart.embl.de/smart/DDt.cgi?smart=983:	Uncharacterized protein	20305721	20305721	684158918	GI:684158918	GeneID:20305721	GeneID:20305721	H6BLN7	H6BLN7_EXODN	HMPREF1120_01082	HMPREF1120_01082	Hypothetical protein	Uncharacterized protein	XM_009155089.1	XP_009153337	XP_009153337.1	XP_009153337.1	XP_009153337.1	hypothetical protein	hypothetical protein
XP_009153338.1	5970.XP_009153338.1	https://smart.embl.de/smart/DDvec.cgi?smart=256:RRM(66|139)+FoP_duplication(153|224)+	Uncharacterized protein	20305722	20305722	684158920	GI:684158920	GeneID:20305722	GeneID:20305722	H6BLN8	H6BLN8_EXODN	HMPREF1120_01083	HMPREF1120_01083	Hypothetical protein	Uncharacterized protein	XM_009155090.1	XP_009153338	XP_009153338.1	XP_009153338.1	XP_009153338.1	hypothetical protein	hypothetical protein
XP_009153352.1	5970.XP_009153352.1	https://smart.embl.de/smart/DDvec.cgi?smart=371:Pfam_MIP(46|295)+	Aquaglyceroporin like protein; Belongs to the MIP/aquaporin (TC 1.A.8) family	20305735	20305735	684158948	Aquaglyceroporin like protein	Aquaglyceroporin like protein	GI:684158948	GeneID:20305735	GeneID:20305735	H6BLQ2	H6BLQ2_EXODN	HMPREF1120_01096	HMPREF1120_01096	XM_009155104.1	XP_009153352	XP_009153352.1	XP_009153352.1	XP_009153352.1	aquaglyceroporin like protein	aquaglyceroporin like protein
XP_009153355.1	5970.XP_009153355.1	http://smart.embl.de/smart/DDt.cgi?smart=187:	Uncharacterized protein	20305738	20305738	684158954	GI:684158954	GeneID:20305738	GeneID:20305738	H6BLQ5	H6BLQ5_EXODN	HMPREF1120_01099	HMPREF1120_01099	Hypothetical protein	Uncharacterized protein	XM_009155107.1	XP_009153355	XP_009153355.1	XP_009153355.1	XP_009153355.1	hypothetical protein	hypothetical protein
XP_009153365.1	5970.XP_009153365.1	https://smart.embl.de/smart/DDvec.cgi?smart=496:Pfam_Aldedh(26|486)+	Aldehyde dehydrogenase; Belongs to the aldehyde dehydrogenase family	20305748	20305748	684158974	Aldehyde dehydrogenase	Aldehyde dehydrogenase	GI:684158974	GeneID:20305748	GeneID:20305748	H6BLR5	H6BLR5_EXODN	HMPREF1120_01109	HMPREF1120_01109	XM_009155117.1	XP_009153365	XP_009153365.1	XP_009153365.1	XP_009153365.1	aldehyde dehydrogenase	aldehyde dehydrogenase
XP_009153370.1	5970.XP_009153370.1	https://smart.embl.de/smart/DDvec.cgi?smart=361:Pfam_Abhydrolase_3(118|338)+	Triacylglycerol lipase	20305751	20305751	684158984	GI:684158984	GeneID:20305751	GeneID:20305751	H6BLS0	H6BLS0_EXODN	HMPREF1120_01112	HMPREF1120_01112	Triacylglycerol lipase	Triacylglycerol lipase	XM_009155122.1	XP_009153370	XP_009153370.1	XP_009153370.1	XP_009153370.1	triacylglycerol lipase	triacylglycerol lipase
XP_009153371.1	5970.XP_009153371.1	https://smart.embl.de/smart/DDvec.cgi?smart=632:GAL4(10|54)+Fungal_trans(214|286)+	Uncharacterized protein	20305752	20305752	684158986	GI:684158986	GeneID:20305752	GeneID:20305752	H6BLS1	H6BLS1_EXODN	HMPREF1120_01113	HMPREF1120_01113	Hypothetical protein	Uncharacterized protein	XM_009155123.1	XP_009153371	XP_009153371.1	XP_009153371.1	XP_009153371.1	hypothetical protein	hypothetical protein
XP_009153372.1	5970.XP_009153372.1	https://smart.embl.de/smart/DDvec.cgi?smart=487:Pfam_MFS_1(48|415)+TRANS(429|451)+	Retrograde regulation protein 2	20305753	20305753	684158988	GI:684158988	GeneID:20305753	GeneID:20305753	H6BLS2	H6BLS2_EXODN	HMPREF1120_01114	HMPREF1120_01114	Retrograde regulation protein 2	Retrograde regulation protein 2	XM_009155124.1	XP_009153372	XP_009153372.1	XP_009153372.1	XP_009153372.1	retrograde regulation protein 2	retrograde regulation protein 2
XP_009153396.1	5970.XP_009153396.1	http://smart.embl.de/smart/DDt.cgi?smart=358:	Uncharacterized protein	20305776	20305776	684159036	GI:684159036	GeneID:20305776	GeneID:20305776	H6BLZ9	H6BLZ9_EXODN	HMPREF1120_01137	HMPREF1120_01137	Hypothetical protein	Uncharacterized protein	XM_009155148.1	XP_009153396	XP_009153396.1	XP_009153396.1	XP_009153396.1	hypothetical protein	hypothetical protein
XP_009153398.1	5970.XP_009153398.1	https://smart.embl.de/smart/DDvec.cgi?smart=880:COIL(31|64)+	Uncharacterized protein	20305778	20305778	684159040	GI:684159040	GeneID:20305778	GeneID:20305778	H6BM01	H6BM01_EXODN	HMPREF1120_01139	HMPREF1120_01139	Hypothetical protein	Uncharacterized protein	XM_009155150.1	XP_009153398	XP_009153398.1	XP_009153398.1	XP_009153398.1	hypothetical protein	hypothetical protein
XP_009153408.1	5970.XP_009153408.1	https://smart.embl.de/smart/DDvec.cgi?smart=680:Pfam_Sugar_tr(22|224)+TRANS(543|565)+	Uncharacterized protein	20305787	20305787	684159060	GI:684159060	GeneID:20305787	GeneID:20305787	H6BM10	H6BM10_EXODN	HMPREF1120_01148	HMPREF1120_01148	Hypothetical protein	Uncharacterized protein	XM_009155160.1	XP_009153408	XP_009153408.1	XP_009153408.1	XP_009153408.1	hypothetical protein	hypothetical protein
XP_009153409.1	5970.XP_009153409.1	https://smart.embl.de/smart/DDvec.cgi?smart=1149:COIL(639|672)+COIL(728|755)+TRANS(1091|1113)+	Uncharacterized protein	20305788	20305788	684159062	GI:684159062	GeneID:20305788	GeneID:20305788	H6BM12	H6BM12_EXODN	HMPREF1120_01149	HMPREF1120_01149	Hypothetical protein	Uncharacterized protein	XM_009155161.1	XP_009153409	XP_009153409.1	XP_009153409.1	XP_009153409.1	hypothetical protein	hypothetical protein
XP_009153410.1	5970.XP_009153410.1	https://smart.embl.de/smart/DDvec.cgi?smart=354:Pfam_adh_short(124|263)+	1-acylglycerone phosphate reductase; Belongs to the short-chain dehydrogenases/reductases (SDR) family	1-acylglycerone phosphate reductase	1-acylglycerone phosphate reductase	1-acylglycerone phosphate reductase	20305789	20305789	684159064	GI:684159064	GeneID:20305789	GeneID:20305789	H6BM13	H6BM13_EXODN	HMPREF1120_01150	HMPREF1120_01150	XM_009155162.1	XP_009153410	XP_009153410.1	XP_009153410.1	XP_009153410.1
XP_009153412.1	5970.XP_009153412.1	https://smart.embl.de/smart/DDvec.cgi?smart=267:Pfam_MTP18(48|225)+	Uncharacterized protein	20305791	20305791	684159068	GI:684159068	GeneID:20305791	GeneID:20305791	H6BM15	H6BM15_EXODN	HMPREF1120_01152	HMPREF1120_01152	Hypothetical protein	Uncharacterized protein	XM_009155164.1	XP_009153412	XP_009153412.1	XP_009153412.1	XP_009153412.1	hypothetical protein	hypothetical protein
XP_009153414.1	5970.XP_009153414.1	https://smart.embl.de/smart/DDvec.cgi?smart=340:Pfam_AAT(106|331)+	isopenicillin-N N-acyltransferase	20305793	20305793	684159072	GI:684159072	GeneID:20305793	GeneID:20305793	H6BM17	H6BM17_EXODN	HMPREF1120_01154	HMPREF1120_01154	Isopenicillin-N N-acyltransferase	XM_009155166.1	XP_009153414	XP_009153414.1	XP_009153414.1	XP_009153414.1	isopenicillin-N N-acyltransferase	isopenicillin-N N-acyltransferase
XP_009153416.1	5970.XP_009153416.1	https://smart.embl.de/smart/DDvec.cgi?smart=243:Pfam_Methyltransf_3(31|241)+	mdmC; O-methyltransferase	20305795	20305795	684159076	GI:684159076	GeneID:20305795	GeneID:20305795	H6BM19	H6BM19_EXODN	HMPREF1120_01156	HMPREF1120_01156	MdmC	XM_009155168.1	XP_009153416	XP_009153416.1	XP_009153416.1	XP_009153416.1	mdmC	mdmC
XP_009153421.1	5970.XP_009153421.1	https://smart.embl.de/smart/DDvec.cgi?smart=539:Pfam_SAC3_GANP(269|496)+	Uncharacterized protein	20305800	20305800	684159086	GI:684159086	GeneID:20305800	GeneID:20305800	H6BM24	H6BM24_EXODN	HMPREF1120_01161	HMPREF1120_01161	Hypothetical protein	Uncharacterized protein	XM_009155173.1	XP_009153421	XP_009153421.1	XP_009153421.1	XP_009153421.1	hypothetical protein	hypothetical protein
XP_009153424.1	5970.XP_009153424.1	http://smart.embl.de/smart/DDt.cgi?smart=386:	Uncharacterized protein	20305803	20305803	684159092	GI:684159092	GeneID:20305803	GeneID:20305803	H6BM27	H6BM27_EXODN	HMPREF1120_01164	HMPREF1120_01164	Hypothetical protein	Uncharacterized protein	XM_009155176.1	XP_009153424	XP_009153424.1	XP_009153424.1	XP_009153424.1	hypothetical protein	hypothetical protein
XP_009153427.1	5970.XP_009153427.1	https://smart.embl.de/smart/DDvec.cgi?smart=516:Pfam_FPN1(5|457)+	Uncharacterized protein	20305806	20305806	684159098	GI:684159098	GeneID:20305806	GeneID:20305806	H6BM30	H6BM30_EXODN	HMPREF1120_01167	HMPREF1120_01167	Hypothetical protein	Uncharacterized protein	XM_009155179.1	XP_009153427	XP_009153427.1	XP_009153427.1	XP_009153427.1	hypothetical protein	hypothetical protein
XP_009153432.1	5970.XP_009153432.1	http://smart.embl.de/smart/DDt.cgi?smart=127:	Uncharacterized protein	20305811	20305811	684159108	GI:684159108	GeneID:20305811	GeneID:20305811	H6BM35	H6BM35_EXODN	HMPREF1120_01172	HMPREF1120_01172	Hypothetical protein	Uncharacterized protein	XM_009155184.1	XP_009153432	XP_009153432.1	XP_009153432.1	XP_009153432.1	hypothetical protein	hypothetical protein
XP_009153433.1	5970.XP_009153433.1	https://smart.embl.de/smart/DDvec.cgi?smart=345:Pfam_ADP_ribosyl_GH(13|319)+	ADP-ribosylglycohydrolase	20305812	20305812	684159110	ADP-ribosylglycohydrolase	ADP-ribosylglycohydrolase	ADP-ribosylglycohydrolase	GI:684159110	GeneID:20305812	GeneID:20305812	H6BM91	H6BM91_EXODN	HMPREF1120_01173	HMPREF1120_01173	XM_009155185.1	XP_009153433	XP_009153433.1	XP_009153433.1	XP_009153433.1
XP_009153438.1	5970.XP_009153438.1	http://smart.embl.de/smart/DDt.cgi?smart=296:	Uncharacterized protein	20305817	20305817	684159120	GI:684159120	GeneID:20305817	GeneID:20305817	H6BM96	H6BM96_EXODN	HMPREF1120_01178	HMPREF1120_01178	Hypothetical protein	Uncharacterized protein	XM_009155190.1	XP_009153438	XP_009153438.1	XP_009153438.1	XP_009153438.1	hypothetical protein	hypothetical protein
XP_009153440.1	5970.XP_009153440.1	https://smart.embl.de/smart/DDvec.cgi?smart=270:Pfam_DUF2458(106|269)+	Uncharacterized protein	20305819	20305819	684159124	GI:684159124	GeneID:20305819	GeneID:20305819	H6BM98	H6BM98_EXODN	HMPREF1120_01180	HMPREF1120_01180	Hypothetical protein	Uncharacterized protein	XM_009155192.1	XP_009153440	XP_009153440.1	XP_009153440.1	XP_009153440.1	hypothetical protein	hypothetical protein
XP_009153441.1	5970.XP_009153441.1	https://smart.embl.de/smart/DDvec.cgi?smart=479:BTB(14|193)+COIL(266|301)+COIL(364|438)+	Uncharacterized protein	20305820	20305820	684159126	GI:684159126	GeneID:20305820	GeneID:20305820	H6BM99	H6BM99_EXODN	HMPREF1120_01181	HMPREF1120_01181	Hypothetical protein	Uncharacterized protein	XM_009155193.1	XP_009153441	XP_009153441.1	XP_009153441.1	XP_009153441.1	hypothetical protein	hypothetical protein
XP_009153442.1	5970.XP_009153442.1	http://smart.embl.de/smart/DDt.cgi?smart=441:	Uncharacterized protein	20305821	20305821	684159128	GI:684159128	GeneID:20305821	GeneID:20305821	H6BMA0	H6BMA0_EXODN	HMPREF1120_01182	HMPREF1120_01182	Hypothetical protein	Uncharacterized protein	XM_009155194.1	XP_009153442	XP_009153442.1	XP_009153442.1	XP_009153442.1	hypothetical protein	hypothetical protein
XP_009153446.1	5970.XP_009153446.1	https://smart.embl.de/smart/DDvec.cgi?smart=904:TRANS(267|289)+TRANS(304|326)+Pfam_Glyco_trans_2_3(515|893)+	Uncharacterized protein	20305825	20305825	684159136	GI:684159136	GeneID:20305825	GeneID:20305825	H6BMA4	H6BMA4_EXODN	HMPREF1120_01186	HMPREF1120_01186	Hypothetical protein	Uncharacterized protein	XM_009155198.1	XP_009153446	XP_009153446.1	XP_009153446.1	XP_009153446.1	hypothetical protein	hypothetical protein
XP_009153452.1	5970.XP_009153452.1	https://smart.embl.de/smart/DDvec.cgi?smart=1217:SH3(6|66)+	Uncharacterized protein	20305831	20305831	684159148	GI:684159148	GeneID:20305831	GeneID:20305831	H6BMB0	H6BMB0_EXODN	HMPREF1120_01192	HMPREF1120_01192	Hypothetical protein	Uncharacterized protein	XM_009155204.1	XP_009153452	XP_009153452.1	XP_009153452.1	XP_009153452.1	hypothetical protein	hypothetical protein
XP_009153463.1	5970.XP_009153463.1	https://smart.embl.de/smart/DDvec.cgi?smart=550:Pfam_Clr5(6|58)+	Uncharacterized protein	20305842	20305842	684159170	GI:684159170	GeneID:20305842	GeneID:20305842	H6BMC1	H6BMC1_EXODN	HMPREF1120_01203	HMPREF1120_01203	Hypothetical protein	Uncharacterized protein	XM_009155215.1	XP_009153463	XP_009153463.1	XP_009153463.1	XP_009153463.1	hypothetical protein	hypothetical protein
XP_009153464.1	5970.XP_009153464.1	https://smart.embl.de/smart/DDvec.cgi?smart=858:Pfam_AAA_16(390|564)+Pfam_ORC4_C(602|838)+	Origin recognition complex subunit 4	20305843	20305843	684159172	GI:684159172	GeneID:20305843	GeneID:20305843	H6BMC2	H6BMC2_EXODN	HMPREF1120_01204	HMPREF1120_01204	Origin recognition complex subunit 4	Origin recognition complex subunit 4	XM_009155216.1	XP_009153464	XP_009153464.1	XP_009153464.1	XP_009153464.1	origin recognition complex subunit 4	origin recognition complex subunit 4
XP_009153465.1	5970.XP_009153465.1	https://smart.embl.de/smart/DDvec.cgi?smart=252:TRANS(5|24)+	Uncharacterized protein	20305844	20305844	684159174	GI:684159174	GeneID:20305844	GeneID:20305844	H6BMC3	H6BMC3_EXODN	HMPREF1120_01205	HMPREF1120_01205	Hypothetical protein	Uncharacterized protein	XM_009155217.1	XP_009153465	XP_009153465.1	XP_009153465.1	XP_009153465.1	hypothetical protein	hypothetical protein
XP_009153484.1	5970.XP_009153484.1	https://smart.embl.de/smart/DDvec.cgi?smart=838:Pfam_Glyco_hydro_3(29|287)+Pfam_PA14(438|532)+Fn3_like(747|818)+	Beta-glucosidase; Belongs to the glycosyl hydrolase 3 family	20305863	20305863	684159212	Beta-glucosidase	Beta-glucosidase	GI:684159212	GeneID:20305863	GeneID:20305863	H6BME2	H6BME2_EXODN	HMPREF1120_01224	HMPREF1120_01224	XM_009155236.1	XP_009153484	XP_009153484.1	XP_009153484.1	XP_009153484.1	beta-glucosidase	beta-glucosidase
XP_009153487.1	5970.XP_009153487.1	http://smart.embl.de/smart/DDt.cgi?smart=556:	Uncharacterized protein	20305866	20305866	684159218	GI:684159218	GeneID:20305866	GeneID:20305866	H6BMJ9	H6BMJ9_EXODN	HMPREF1120_01227	HMPREF1120_01227	Hypothetical protein	Uncharacterized protein	XM_009155239.1	XP_009153487	XP_009153487.1	XP_009153487.1	XP_009153487.1	hypothetical protein	hypothetical protein
BNA5	5970.XP_009153488.1	https://smart.embl.de/smart/DDvec.cgi?smart=468:Pfam_Aminotran_5(193|286)+	Kynureninase; Catalyzes the cleavage of L-kynurenine (L-Kyn) and L-3- hydroxykynurenine (L-3OHKyn) into anthranilic acid (AA) and 3- hydroxyanthranilic acid (3-OHAA), respectively; Belongs to the kynureninase family	20305867	20305867	684159220	BNA5	Biosynthesis of nicotinic acid protein 5	GI:684159220	GeneID:20305867	GeneID:20305867	H6BMK0	H6BMK0_EXODN	HMPREF1120_01228	HMPREF1120_01228	Kynureninase	Kynureninase 1	L-kynurenine hydrolase	XM_009155240.1	XP_009153488	XP_009153488.1	XP_009153488.1	XP_009153488.1	kynureninase 1	kynureninase 1
XP_009153493.1	5970.XP_009153493.1	http://smart.embl.de/smart/DDt.cgi?smart=375:	Uncharacterized protein	20305872	20305872	684159230	GI:684159230	GeneID:20305872	GeneID:20305872	H6BMK5	H6BMK5_EXODN	HMPREF1120_01233	HMPREF1120_01233	Hypothetical protein	Uncharacterized protein	XM_009155245.1	XP_009153493	XP_009153493.1	XP_009153493.1	XP_009153493.1	hypothetical protein	hypothetical protein
XP_009153504.1	5970.XP_009153504.1	http://smart.embl.de/smart/DDt.cgi?smart=701:	Uncharacterized protein	20305883	20305883	684159252	GI:684159252	GeneID:20305883	GeneID:20305883	H6BML6	H6BML6_EXODN	HMPREF1120_01244	HMPREF1120_01244	Hypothetical protein	Uncharacterized protein	XM_009155256.1	XP_009153504	XP_009153504.1	XP_009153504.1	XP_009153504.1	hypothetical protein	hypothetical protein
XP_009153505.1	5970.XP_009153505.1	https://smart.embl.de/smart/DDvec.cgi?smart=685:COIL(189|237)+	Uncharacterized protein	20305884	20305884	684159254	GI:684159254	GeneID:20305884	GeneID:20305884	H6BML7	H6BML7_EXODN	HMPREF1120_01245	HMPREF1120_01245	Hypothetical protein	Uncharacterized protein	XM_009155257.1	XP_009153505	XP_009153505.1	XP_009153505.1	XP_009153505.1	hypothetical protein	hypothetical protein
XP_009153513.1	5970.XP_009153513.1	https://smart.embl.de/smart/DDvec.cgi?smart=1366:Pfam_Pkinase_Tyr(122|347)+ANK(667|696)+ANK(702|731)+ANK(735|767)+ANK(791|817)+ANK(824|855)+ANK(908|937)+ANK(974|1003)+ANK(1014|1046)+ANK(1053|1082)+ANK(1211|1241)+ZnF_ZZ(1258|1306)+	Uncharacterized protein	20305892	20305892	684159270	GI:684159270	GeneID:20305892	GeneID:20305892	H6BMM5	H6BMM5_EXODN	HMPREF1120_01253	HMPREF1120_01253	Hypothetical protein	Uncharacterized protein	XM_009155265.1	XP_009153513	XP_009153513.1	XP_009153513.1	XP_009153513.1	hypothetical protein	hypothetical protein
XP_009153514.1	5970.XP_009153514.1	https://smart.embl.de/smart/DDvec.cgi?smart=1459:COIL(464|494)+Pfam_CorA(1196|1377)+	Uncharacterized protein	20305893	20305893	684159272	GI:684159272	GeneID:20305893	GeneID:20305893	H6BMM6	H6BMM6_EXODN	HMPREF1120_01254	HMPREF1120_01254	Hypothetical protein	Uncharacterized protein	XM_009155266.1	XP_009153514	XP_009153514.1	XP_009153514.1	XP_009153514.1	hypothetical protein	hypothetical protein
XP_009153518.1	5970.XP_009153518.1	https://smart.embl.de/smart/DDvec.cgi?smart=755:HATPase_c(47|189)+DNA_mis_repair(247|366)+Pfam_Mlh1_C(471|755)+	DNA mismatch repair protein MLH1	20305897	20305897	684159280	DNA mismatch repair protein MLH1	DNA mismatch repair protein MLH1	DNA mismatch repair protein MLH1	GI:684159280	GeneID:20305897	GeneID:20305897	H6BMN0	H6BMN0_EXODN	HMPREF1120_01258	HMPREF1120_01258	XM_009155270.1	XP_009153518	XP_009153518.1	XP_009153518.1	XP_009153518.1
XP_009153536.1	5970.XP_009153536.1	https://smart.embl.de/smart/DDvec.cgi?smart=257:Pfam_Peptidase_C12(15|232)+	Ubiquitin carboxyl-terminal hydrolase L3	20305915	20305915	684159316	GI:684159316	GeneID:20305915	GeneID:20305915	H6BMP8	H6BMP8_EXODN	HMPREF1120_01276	HMPREF1120_01276	Ubiquitin carboxyl-terminal hydrolase	Ubiquitin carboxyl-terminal hydrolase L3	XM_009155288.1	XP_009153536	XP_009153536.1	XP_009153536.1	XP_009153536.1	ubiquitin carboxyl-terminal hydrolase L3	ubiquitin carboxyl-terminal hydrolase L3
XP_009153543.1	5970.XP_009153543.1	http://smart.embl.de/smart/DDt.cgi?smart=237:	Uncharacterized protein	20305921	20305921	684159330	GI:684159330	GeneID:20305921	GeneID:20305921	H6BMV9	H6BMV9_EXODN	HMPREF1120_01282	HMPREF1120_01282	Hypothetical protein	Uncharacterized protein	XM_009155295.1	XP_009153543	XP_009153543.1	XP_009153543.1	XP_009153543.1	hypothetical protein	hypothetical protein
XP_009153545.1	5970.XP_009153545.1	https://smart.embl.de/smart/DDvec.cgi?smart=1519:Pfam_ABC_trans_N(58|151)+AAA(180|390)+Pfam_ABC2_membrane(497|707)+Pfam_PDR_CDR(718|808)+AAA(879|1079)+Pfam_ABC2_membrane(1163|1373)+TRANS(1448|1470)+	ABC multidrug transporter; Belongs to the ABC transporter superfamily. ABCG family. PDR (TC 3.A.1.205) subfamily	20305923	20305923	684159334	ABC multidrug transporter	ABC multidrug transporter	ABC multidrug transporter	GI:684159334	GeneID:20305923	GeneID:20305923	H6BMW1	H6BMW1_EXODN	HMPREF1120_01284	HMPREF1120_01284	XM_009155297.1	XP_009153545	XP_009153545.1	XP_009153545.1	XP_009153545.1
XP_009153555.1	5970.XP_009153555.1	https://smart.embl.de/smart/DDvec.cgi?smart=374:JAB_MPN(53|191)+	COP9 signalosome complex subunit 5	20305933	20305933	684159354	COP9 signalosome complex subunit 5	COP9 signalosome complex subunit 5	COP9 signalosome complex subunit 5	GI:684159354	GeneID:20305933	GeneID:20305933	H6BMX1	H6BMX1_EXODN	HMPREF1120_01294	HMPREF1120_01294	XM_009155307.1	XP_009153555	XP_009153555.1	XP_009153555.1	XP_009153555.1
katG	5970.XP_009153560.1	https://smart.embl.de/smart/DDvec.cgi?smart=757:Pfam_peroxidase(62|412)+Pfam_peroxidase(417|721)+	Catalase-peroxidase; Belongs to the peroxidase family. Peroxidase/catalase subfamily	20305938	20305938	684159364	Catalase-peroxidase	Catalase-peroxidase	GI:684159364	GeneID:20305938	GeneID:20305938	H6BMX6	H6BMX6_EXODN	HMPREF1120_01299	HMPREF1120_01299	Peroxidase/catalase	XM_009155312.1	XP_009153560	XP_009153560.1	XP_009153560.1	XP_009153560.1	catalase-peroxidase	catalase-peroxidase	katG
XP_009153566.1	5970.XP_009153566.1	https://smart.embl.de/smart/DDvec.cgi?smart=1165:HIRAN(172|285)+DEXDc(415|707)+RING(886|930)+HELICc(1016|1104)+	Uncharacterized protein	20305944	20305944	684159376	GI:684159376	GeneID:20305944	GeneID:20305944	H6BMY2	H6BMY2_EXODN	HMPREF1120_01305	HMPREF1120_01305	Hypothetical protein	Uncharacterized protein	XM_009155318.1	XP_009153566	XP_009153566.1	XP_009153566.1	XP_009153566.1	hypothetical protein	hypothetical protein
XP_009153567.1	5970.XP_009153567.1	https://smart.embl.de/smart/DDvec.cgi?smart=561:Pfam_Oxidored_molyb(179|362)+Pfam_Mo-co_dimer(385|509)+	Sulfite oxidase	20305945	20305945	684159378	GI:684159378	GeneID:20305945	GeneID:20305945	H6BMY3	H6BMY3_EXODN	HMPREF1120_01306	HMPREF1120_01306	Sulfite oxidase	Sulfite oxidase	XM_009155319.1	XP_009153567	XP_009153567.1	XP_009153567.1	XP_009153567.1	sulfite oxidase	sulfite oxidase
XP_009153575.1	5970.XP_009153575.1	https://smart.embl.de/smart/DDvec.cgi?smart=747:Catalase(46|438)+Pfam_Catalase-rel(464|527)+	Catalase; Occurs in almost all aerobically respiring organisms and serves to protect cells from the toxic effects of hydrogen peroxide; Belongs to the catalase family	20305953	20305953	684159394	Catalase	Catalase A	GI:684159394	GeneID:20305953	GeneID:20305953	H6BMZ1	H6BMZ1_EXODN	HMPREF1120_01314	HMPREF1120_01314	XM_009155327.1	XP_009153575	XP_009153575.1	XP_009153575.1	XP_009153575.1	catalase A	catalase A
XP_009153576.1	5970.XP_009153576.1	https://smart.embl.de/smart/DDvec.cgi?smart=443:CTNS(56|87)+CTNS(279|310)+TRANS(352|374)+	Uncharacterized protein	20305954	20305954	684159396	GI:684159396	GeneID:20305954	GeneID:20305954	H6BMZ2	H6BMZ2_EXODN	HMPREF1120_01315	HMPREF1120_01315	Hypothetical protein	Uncharacterized protein	XM_009155328.1	XP_009153576	XP_009153576.1	XP_009153576.1	XP_009153576.1	hypothetical protein	hypothetical protein
XP_009153579.1	5970.XP_009153579.1	http://smart.embl.de/smart/DDt.cgi?smart=226:	Uncharacterized protein	20305957	20305957	684159402	GI:684159402	GeneID:20305957	GeneID:20305957	H6BMZ5	H6BMZ5_EXODN	HMPREF1120_01318	HMPREF1120_01318	Hypothetical protein	Uncharacterized protein	XM_009155331.1	XP_009153579	XP_009153579.1	XP_009153579.1	XP_009153579.1	hypothetical protein	hypothetical protein
XP_009153581.1	5970.XP_009153581.1	https://smart.embl.de/smart/DDvec.cgi?smart=603:TRANS(23|45)+TRANS(57|79)+Pfam_UCH(140|494)+	Ubiquitin thiolesterase; Belongs to the peptidase C19 family	20305959	20305959	684159406	GI:684159406	GeneID:20305959	GeneID:20305959	H6BMZ7	H6BMZ7_EXODN	HMPREF1120_01320	HMPREF1120_01320	Ubiquitin thiolesterase	Ubiquitin thiolesterase	XM_009155333.1	XP_009153581	XP_009153581.1	XP_009153581.1	XP_009153581.1	ubiquitin thiolesterase	ubiquitin thiolesterase
XP_009153589.1	5970.XP_009153589.1	https://smart.embl.de/smart/DDvec.cgi?smart=662:Pfam_Pol_alpha_B_N(21|264)+Pfam_DNA_pol_E_B(375|605)+	DNA polymerase alpha subunit B; May play an essential role at the early stage of chromosomal DNA replication by coupling the polymerase alpha/primase complex to the cellular replication machinery	20305967	20305967	684159422	DNA polymerase alpha subunit B	DNA polymerase alpha subunit B	DNA polymerase alpha subunit B	GI:684159422	GeneID:20305967	GeneID:20305967	H6BN05	H6BN05_EXODN	HMPREF1120_01328	HMPREF1120_01328	XM_009155341.1	XP_009153589	XP_009153589.1	XP_009153589.1	XP_009153589.1
XP_009153606.1	5970.XP_009153606.1	https://smart.embl.de/smart/DDvec.cgi?smart=1044:Pfam_DNA_ligase_A_N(43|248)+Pfam_RNA_ligase(314|512)+Pfam_DNA_ligase_A_C(574|682)+COIL(687|719)+BRCT(750|832)+Pfam_DNA_ligase_IV(861|893)+BRCT(927|1033)+	DNA ligase 4	20305982	20305982	684159456	DNA ligase	DNA ligase 4	DNA ligase 4	GI:684159456	GeneID:20305982	GeneID:20305982	H6BN77	H6BN77_EXODN	HMPREF1120_01343	HMPREF1120_01343	XM_009155358.1	XP_009153606	XP_009153606.1	XP_009153606.1	XP_009153606.1
XP_009153610.1	5970.XP_009153610.1	https://smart.embl.de/smart/DDvec.cgi?smart=856:Pfam_Methyltransf_33(22|330)+Pfam_FGE-sulfatase(545|681)+Pfam_FGE-sulfatase(730|852)+	Uncharacterized protein	20305986	20305986	684159464	GI:684159464	GeneID:20305986	GeneID:20305986	H6BN81	H6BN81_EXODN	HMPREF1120_01347	HMPREF1120_01347	Hypothetical protein	Uncharacterized protein	XM_009155362.1	XP_009153610	XP_009153610.1	XP_009153610.1	XP_009153610.1	hypothetical protein	hypothetical protein
XP_009153612.1	5970.XP_009153612.1	https://smart.embl.de/smart/DDvec.cgi?smart=720:WD40(222|255)+WD40(263|302)+WD40(305|346)+WD40(397|440)+WD40(457|497)+WD40(636|680)+	Uncharacterized protein	20305988	20305988	684159468	GI:684159468	GeneID:20305988	GeneID:20305988	H6BN83	H6BN83_EXODN	HMPREF1120_01349	HMPREF1120_01349	Hypothetical protein	Uncharacterized protein	XM_009155364.1	XP_009153612	XP_009153612.1	XP_009153612.1	XP_009153612.1	hypothetical protein	hypothetical protein
XP_009153619.1	5970.XP_009153619.1	https://smart.embl.de/smart/DDvec.cgi?smart=474:Pfam_Aldedh(2|467)+	Aldehyde dehydrogenase; Belongs to the aldehyde dehydrogenase family	20305995	20305995	684159482	Aldehyde dehydrogenase	Aldehyde dehydrogenase	GI:684159482	GeneID:20305995	GeneID:20305995	H6BN90	H6BN90_EXODN	HMPREF1120_01356	HMPREF1120_01356	XM_009155371.1	XP_009153619	XP_009153619.1	XP_009153619.1	XP_009153619.1	aldehyde dehydrogenase	aldehyde dehydrogenase
XP_009153636.1	5970.XP_009153636.1	https://smart.embl.de/smart/DDvec.cgi?smart=532:Pfam_CDC27(18|531)+	DNA polymerase delta subunit 3	20306012	20306012	684159516	DNA polymerase delta subunit 3	DNA polymerase delta subunit 3	DNA polymerase delta subunit 3	GI:684159516	GeneID:20306012	GeneID:20306012	H6BNA7	H6BNA7_EXODN	HMPREF1120_01373	HMPREF1120_01373	XM_009155388.1	XP_009153636	XP_009153636.1	XP_009153636.1	XP_009153636.1
XP_009153638.1	5970.XP_009153638.1	https://smart.embl.de/smart/DDvec.cgi?smart=327:Pfam_Abhydrolase_3(94|305)+	Triacylglycerol lipase	20306014	20306014	684159520	GI:684159520	GeneID:20306014	GeneID:20306014	H6BNA9	H6BNA9_EXODN	HMPREF1120_01375	HMPREF1120_01375	Triacylglycerol lipase	Triacylglycerol lipase	XM_009155390.1	XP_009153638	XP_009153638.1	XP_009153638.1	XP_009153638.1	triacylglycerol lipase	triacylglycerol lipase
XP_009153639.1	5970.XP_009153639.1	http://smart.embl.de/smart/DDt.cgi?smart=864:	Uncharacterized protein	20306015	20306015	684159522	GI:684159522	GeneID:20306015	GeneID:20306015	H6BNB0	H6BNB0_EXODN	HMPREF1120_01376	HMPREF1120_01376	Hypothetical protein	Uncharacterized protein	XM_009155391.1	XP_009153639	XP_009153639.1	XP_009153639.1	XP_009153639.1	hypothetical protein	hypothetical protein
XP_009153648.1	5970.XP_009153648.1	https://smart.embl.de/smart/DDvec.cgi?smart=1616:Pfam_PhoLip_ATPase_N(213|285)+Pfam_E1-E2_ATPase(326|565)+Pfam_Cation_ATPase(732|837)+Pfam_PhoLip_ATPase_C(1219|1469)+COIL(1503|1530)+	Phospholipid-translocating ATPase; Belongs to the cation transport ATPase (P-type) (TC 3.A.3) family. Type IV subfamily	20306024	20306024	684159540	GI:684159540	GeneID:20306024	GeneID:20306024	H6BNB9	H6BNB9_EXODN	HMPREF1120_01385	HMPREF1120_01385	Phospholipid-translocating ATPase	Phospholipid-transporting ATPase	XM_009155400.1	XP_009153648	XP_009153648.1	XP_009153648.1	XP_009153648.1	phospholipid-translocating ATPase	phospholipid-translocating ATPase
XP_009153666.1	5970.XP_009153666.1	https://smart.embl.de/smart/DDvec.cgi?smart=357:COIL(284|306)+	Uncharacterized protein	20306042	20306042	684159576	GI:684159576	GeneID:20306042	GeneID:20306042	H6BNM0	H6BNM0_EXODN	HMPREF1120_01403	HMPREF1120_01403	Hypothetical protein	Uncharacterized protein	XM_009155418.1	XP_009153666	XP_009153666.1	XP_009153666.1	XP_009153666.1	hypothetical protein	hypothetical protein
XP_009153670.1	5970.XP_009153670.1	https://smart.embl.de/smart/DDvec.cgi?smart=652:COIL(282|308)+	Uncharacterized protein	20306045	20306045	684159584	GI:684159584	GeneID:20306045	GeneID:20306045	H6BNM4	H6BNM4_EXODN	HMPREF1120_01406	HMPREF1120_01406	Hypothetical protein	Uncharacterized protein	XM_009155422.1	XP_009153670	XP_009153670.1	XP_009153670.1	XP_009153670.1	hypothetical protein	hypothetical protein
XP_009153681.1	5970.XP_009153681.1	https://smart.embl.de/smart/DDvec.cgi?smart=660:Pfam_FAD_binding_3(7|366)+Pfam_Phe_hydrox_dim(415|595)+	FAD monooxygenase	20306056	20306056	684159606	FAD monooxygenase	FAD monooxygenase	FAD monooxygenase	GI:684159606	GeneID:20306056	GeneID:20306056	H6BNN5	H6BNN5_EXODN	HMPREF1120_01417	HMPREF1120_01417	XM_009155433.1	XP_009153681	XP_009153681.1	XP_009153681.1	XP_009153681.1
XP_009153686.1	5970.XP_009153686.1	https://smart.embl.de/smart/DDvec.cgi?smart=295:Pfam_HIT(90|219)+Pfam_zf-C2HE(233|291)+	Aprataxin	20306061	20306061	684159616	Aprataxin	Aprataxin	GI:684159616	GeneID:20306061	GeneID:20306061	H6BNP0	H6BNP0_EXODN	HMPREF1120_01422	HMPREF1120_01422	XM_009155438.1	XP_009153686	XP_009153686.1	XP_009153686.1	XP_009153686.1	aprataxin	aprataxin
XP_009153687.1	5970.XP_009153687.1	https://smart.embl.de/smart/DDvec.cgi?smart=250:Pfam_Acetyltransf_10(134|224)+	Uncharacterized protein	20306062	20306062	684159618	GI:684159618	GeneID:20306062	GeneID:20306062	H6BNP1	H6BNP1_EXODN	HMPREF1120_01423	HMPREF1120_01423	Hypothetical protein	Uncharacterized protein	XM_009155439.1	XP_009153687	XP_009153687.1	XP_009153687.1	XP_009153687.1	hypothetical protein	hypothetical protein
XP_009153703.1	5970.XP_009153703.1	https://smart.embl.de/smart/DDvec.cgi?smart=210:SIGNAL(1|20)+Pfam_CFEM(22|86)+	Uncharacterized protein	20306075	20306075	684159650	GI:684159650	GeneID:20306075	GeneID:20306075	H6BNQ7	H6BNQ7_EXODN	HMPREF1120_01436	HMPREF1120_01436	Hypothetical protein	Uncharacterized protein	XM_009155455.1	XP_009153703	XP_009153703.1	XP_009153703.1	XP_009153703.1	hypothetical protein	hypothetical protein
XP_009153714.1	5970.XP_009153714.1	http://smart.embl.de/smart/DDt.cgi?smart=777:	Uncharacterized protein	20306086	20306086	684159672	GI:684159672	GeneID:20306086	GeneID:20306086	H6BP26	H6BP26_EXODN	HMPREF1120_01447	HMPREF1120_01447	Hypothetical protein	Uncharacterized protein	XM_009155466.1	XP_009153714	XP_009153714.1	XP_009153714.1	XP_009153714.1	hypothetical protein	hypothetical protein
XP_009153718.1	5970.XP_009153718.1	http://smart.embl.de/smart/DDt.cgi?smart=784:	Uncharacterized protein	20306090	20306090	684159680	GI:684159680	GeneID:20306090	GeneID:20306090	H6BP30	H6BP30_EXODN	HMPREF1120_01451	HMPREF1120_01451	Hypothetical protein	Uncharacterized protein	XM_009155470.1	XP_009153718	XP_009153718.1	XP_009153718.1	XP_009153718.1	hypothetical protein	hypothetical protein
XP_009153719.1	5970.XP_009153719.1	https://smart.embl.de/smart/DDvec.cgi?smart=509:Pfam_Snf7(244|455)+	Uncharacterized protein; Belongs to the SNF7 family	20306091	20306091	684159682	GI:684159682	GeneID:20306091	GeneID:20306091	H6BP31	H6BP31_EXODN	HMPREF1120_01452	HMPREF1120_01452	Hypothetical protein	Uncharacterized protein	XM_009155471.1	XP_009153719	XP_009153719.1	XP_009153719.1	XP_009153719.1	hypothetical protein	hypothetical protein
XP_009153720.1	5970.XP_009153720.1	https://smart.embl.de/smart/DDvec.cgi?smart=518:RING(30|67)+SAP(299|333)+	E3 ubiquitin-protein ligase RAD18	20306092	20306092	684159684	E3 ubiquitin-protein ligase RAD18	E3 ubiquitin-protein ligase RAD18	E3 ubiquitin-protein ligase RAD18	GI:684159684	GeneID:20306092	GeneID:20306092	H6BP32	H6BP32_EXODN	HMPREF1120_01453	HMPREF1120_01453	XM_009155472.1	XP_009153720	XP_009153720.1	XP_009153720.1	XP_009153720.1
XP_009153731.1	5970.XP_009153731.1	https://smart.embl.de/smart/DDvec.cgi?smart=501:PP2C_SIG(81|382)+	Protein phosphatase	20306103	20306103	684159706	GI:684159706	GeneID:20306103	GeneID:20306103	H6BP43	H6BP43_EXODN	HMPREF1120_01464	HMPREF1120_01464	Protein phosphatase	Protein phosphatase	XM_009155483.1	XP_009153731	XP_009153731.1	XP_009153731.1	XP_009153731.1	protein phosphatase	protein phosphatase
XP_009153736.1	5970.XP_009153736.1	https://smart.embl.de/smart/DDvec.cgi?smart=945:GAL4(44|94)+	Uncharacterized protein	20306108	20306108	684159716	GI:684159716	GeneID:20306108	GeneID:20306108	H6BP48	H6BP48_EXODN	HMPREF1120_01469	HMPREF1120_01469	Hypothetical protein	Uncharacterized protein	XM_009155488.1	XP_009153736	XP_009153736.1	XP_009153736.1	XP_009153736.1	hypothetical protein	hypothetical protein
XP_009153740.1	5970.XP_009153740.1	http://smart.embl.de/smart/DDt.cgi?smart=201:	Calmodulin	20306112	20306112	684159724	Calmodulin	Calmodulin	GI:684159724	GeneID:20306112	GeneID:20306112	H6BP52	H6BP52_EXODN	HMPREF1120_01473	HMPREF1120_01473	XM_009155492.1	XP_009153740	XP_009153740.1	XP_009153740.1	XP_009153740.1	calmodulin	calmodulin
XP_009153741.1	5970.XP_009153741.1	https://smart.embl.de/smart/DDvec.cgi?smart=681:DUF862(1|142)+Pfam_Thioredoxin(217|319)+Pfam_PUL(343|674)+	Mannosyl-glycoprotein endo-beta-N-acetylglucosaminidase	20306113	20306113	684159726	GI:684159726	GeneID:20306113	GeneID:20306113	H6BP53	H6BP53_EXODN	HMPREF1120_01474	HMPREF1120_01474	XM_009155493.1	XP_009153741	XP_009153741.1	XP_009153741.1	XP_009153741.1
XP_009153757.1	5970.XP_009153757.1	https://smart.embl.de/smart/DDvec.cgi?smart=440:Cupin_1(121|241)+Cupin_1(278|420)+	Oxalate decarboxylase	20306129	20306129	684159758	GI:684159758	GeneID:20306129	GeneID:20306129	H6BP69	H6BP69_EXODN	HMPREF1120_01490	HMPREF1120_01490	Oxalate decarboxylase	Oxalate decarboxylase	XM_009155509.1	XP_009153757	XP_009153757.1	XP_009153757.1	XP_009153757.1	oxalate decarboxylase	oxalate decarboxylase
XP_009153775.1	5970.XP_009153775.1	https://smart.embl.de/smart/DDvec.cgi?smart=381:Pfam_IMPDH(214|318)+	Glycolate oxidase	20306147	20306147	684159794	GI:684159794	GeneID:20306147	GeneID:20306147	Glycolate oxidase	Glycolate oxidase	H6BK51	H6BK51_EXODN	HMPREF1120_01508	HMPREF1120_01508	XM_009155527.1	XP_009153775	XP_009153775.1	XP_009153775.1	XP_009153775.1	glycolate oxidase	glycolate oxidase
XP_009153779.1	5970.XP_009153779.1	https://smart.embl.de/smart/DDvec.cgi?smart=224:Pfam_Glyoxalase(41|216)+	Lactoylglutathione lyase	20306151	20306151	684159803	GI:684159803	GeneID:20306151	GeneID:20306151	H6BSB2	H6BSB2_EXODN	HMPREF1120_01512	HMPREF1120_01512	Lactoylglutathione lyase	Lactoylglutathione lyase	XM_009155531.1	XP_009153779	XP_009153779.1	XP_009153779.1	XP_009153779.1	lactoylglutathione lyase	lactoylglutathione lyase
XP_009153786.1	5970.XP_009153786.1	https://smart.embl.de/smart/DDvec.cgi?smart=863:ZnF_C2H2(29|51)+GAL4(72|115)+Pfam_Fungal_trans(371|619)+	Uncharacterized protein	20306158	20306158	684159817	GI:684159817	GeneID:20306158	GeneID:20306158	H6BSB9	H6BSB9_EXODN	HMPREF1120_01519	HMPREF1120_01519	Hypothetical protein	Uncharacterized protein	XM_009155538.1	XP_009153786	XP_009153786.1	XP_009153786.1	XP_009153786.1	hypothetical protein	hypothetical protein
XP_009153789.1	5970.XP_009153789.1	https://smart.embl.de/smart/DDvec.cgi?smart=823:COIL(54|265)+COIL(329|363)+COIL(487|557)+	Uncharacterized protein	20306161	20306161	684159823	GI:684159823	GeneID:20306161	GeneID:20306161	H6BSC2	H6BSC2_EXODN	HMPREF1120_01522	HMPREF1120_01522	Hypothetical protein	Uncharacterized protein	XM_009155541.1	XP_009153789	XP_009153789.1	XP_009153789.1	XP_009153789.1	hypothetical protein	hypothetical protein
XP_009153790.1	5970.XP_009153790.1	https://smart.embl.de/smart/DDvec.cgi?smart=544:COIL(459|543)+	Uncharacterized protein	20306162	20306162	684159825	GI:684159825	GeneID:20306162	GeneID:20306162	H6BSC3	H6BSC3_EXODN	HMPREF1120_01523	HMPREF1120_01523	Hypothetical protein	Uncharacterized protein	XM_009155542.1	XP_009153790	XP_009153790.1	XP_009153790.1	XP_009153790.1	hypothetical protein	hypothetical protein
XP_009153807.1	5970.XP_009153807.1	https://smart.embl.de/smart/DDvec.cgi?smart=128:COIL(43|89)+	Uncharacterized protein	20306179	20306179	684159859	GI:684159859	GeneID:20306179	GeneID:20306179	H6BSE0	H6BSE0_EXODN	HMPREF1120_01540	HMPREF1120_01540	Hypothetical protein	Uncharacterized protein	XM_009155559.1	XP_009153807	XP_009153807.1	XP_009153807.1	XP_009153807.1	hypothetical protein	hypothetical protein
XP_009153816.1	5970.XP_009153816.1	https://smart.embl.de/smart/DDvec.cgi?smart=357:Pfam_Oxidored_molyb(19|203)+Pfam_Mo-co_dimer(229|352)+	Sulfite oxidase	20306188	20306188	684159877	GI:684159877	GeneID:20306188	GeneID:20306188	H6BSE9	H6BSE9_EXODN	HMPREF1120_01549	HMPREF1120_01549	Sulfite oxidase	Sulfite oxidase	XM_009155568.1	XP_009153816	XP_009153816.1	XP_009153816.1	XP_009153816.1	sulfite oxidase	sulfite oxidase
XP_009153832.1	5970.XP_009153832.1	https://smart.embl.de/smart/DDvec.cgi?smart=936:WD40(160|198)+WD40(226|264)+Pfam_DUF2415(292|332)+COIL(595|634)+COIL(741|781)+	Uncharacterized protein	20306204	20306204	684159909	GI:684159909	GeneID:20306204	GeneID:20306204	H6BSL9	H6BSL9_EXODN	HMPREF1120_01565	HMPREF1120_01565	Hypothetical protein	Uncharacterized protein	XM_009155584.1	XP_009153832	XP_009153832.1	XP_009153832.1	XP_009153832.1	hypothetical protein	hypothetical protein
XP_009153841.1	5970.XP_009153841.1	https://smart.embl.de/smart/DDvec.cgi?smart=593:Pfam_Pex24p(116|582)+	Uncharacterized protein	20306213	20306213	684159927	GI:684159927	GeneID:20306213	GeneID:20306213	H6BSM8	H6BSM8_EXODN	HMPREF1120_01574	HMPREF1120_01574	Hypothetical protein	Uncharacterized protein	XM_009155593.1	XP_009153841	XP_009153841.1	XP_009153841.1	XP_009153841.1	hypothetical protein	hypothetical protein
XP_009153853.1	5970.XP_009153853.1	https://smart.embl.de/smart/DDvec.cgi?smart=601:Pfam_HSP70(146|441)+	Uncharacterized protein; Belongs to the heat shock protein 70 family	20306225	20306225	684159951	GI:684159951	GeneID:20306225	GeneID:20306225	H6BSP0	H6BSP0_EXODN	HMPREF1120_01586	HMPREF1120_01586	Hypothetical protein	Uncharacterized protein	XM_009155605.1	XP_009153853	XP_009153853.1	XP_009153853.1	XP_009153853.1	hypothetical protein	hypothetical protein
XP_009153855.1	5970.XP_009153855.1	https://smart.embl.de/smart/DDvec.cgi?smart=424:Pfam_MMR_HSR1(21|145)+COIL(231|380)+TRANS(393|415)+	Uncharacterized protein	20306227	20306227	684159955	GI:684159955	GeneID:20306227	GeneID:20306227	H6BSP2	H6BSP2_EXODN	HMPREF1120_01588	HMPREF1120_01588	Hypothetical protein	Uncharacterized protein	XM_009155607.1	XP_009153855	XP_009153855.1	XP_009153855.1	XP_009153855.1	hypothetical protein	hypothetical protein
XP_009153859.1	5970.XP_009153859.1	https://smart.embl.de/smart/DDvec.cgi?smart=607:SIGNAL(1|19)+Pro-kuma_activ(37|180)+Pfam_Peptidase_S8(327|548)+	Tripeptidyl-peptidase I	20306231	20306231	684159963	GI:684159963	GeneID:20306231	GeneID:20306231	H6BSP6	H6BSP6_EXODN	HMPREF1120_01592	HMPREF1120_01592	Tripeptidyl-peptidase I	Tripeptidyl-peptidase I	XM_009155611.1	XP_009153859	XP_009153859.1	XP_009153859.1	XP_009153859.1	tripeptidyl-peptidase I	tripeptidyl-peptidase I
XP_009153864.1	5970.XP_009153864.1	http://smart.embl.de/smart/DDt.cgi?smart=107:	Uncharacterized protein	20306236	20306236	684159973	GI:684159973	GeneID:20306236	GeneID:20306236	H6BSQ1	H6BSQ1_EXODN	HMPREF1120_01597	HMPREF1120_01597	Hypothetical protein	Uncharacterized protein	XM_009155616.1	XP_009153864	XP_009153864.1	XP_009153864.1	XP_009153864.1	hypothetical protein	hypothetical protein
XP_009153865.1	5970.XP_009153865.1	https://smart.embl.de/smart/DDvec.cgi?smart=584:Pfam_Abhydrolase_1(207|544)+	Alpha/beta hydrolase	20306237	20306237	684159975	Alpha/beta hydrolase	Alpha/beta hydrolase	GI:684159975	GeneID:20306237	GeneID:20306237	H6BSQ2	H6BSQ2_EXODN	HMPREF1120_01598	HMPREF1120_01598	XM_009155617.1	XP_009153865	XP_009153865.1	XP_009153865.1	XP_009153865.1	alpha/beta hydrolase	alpha/beta hydrolase
XP_009153868.1	5970.XP_009153868.1	https://smart.embl.de/smart/DDvec.cgi?smart=1109:WD40(36|75)+WD40(87|126)+WD40(164|203)+WD40(307|356)+WD40(889|931)+WD40(934|973)+	Uncharacterized protein	20306240	20306240	684159981	GI:684159981	GeneID:20306240	GeneID:20306240	H6BSQ5	H6BSQ5_EXODN	HMPREF1120_01601	HMPREF1120_01601	Hypothetical protein	Uncharacterized protein	XM_009155620.1	XP_009153868	XP_009153868.1	XP_009153868.1	XP_009153868.1	hypothetical protein	hypothetical protein
XP_009153886.1	5970.XP_009153886.1	https://smart.embl.de/smart/DDvec.cgi?smart=425:Pfam_BCDHK_Adom3(23|242)+HATPase_c(286|418)+	Pyruvate dehydrogenase kinase	20306257	20306257	684160017	GI:684160017	GeneID:20306257	GeneID:20306257	H6BSX6	H6BSX6_EXODN	HMPREF1120_01618	HMPREF1120_01618	Pyruvate dehydrogenase kinase	Pyruvate dehydrogenase kinase	XM_009155638.1	XP_009153886	XP_009153886.1	XP_009153886.1	XP_009153886.1	pyruvate dehydrogenase kinase	pyruvate dehydrogenase kinase
XP_009153887.1	5970.XP_009153887.1	https://smart.embl.de/smart/DDvec.cgi?smart=414:TRANS(51|70)+	Uncharacterized protein	20306258	20306258	684160019	GI:684160019	GeneID:20306258	GeneID:20306258	H6BSX7	H6BSX7_EXODN	HMPREF1120_01619	HMPREF1120_01619	Hypothetical protein	Uncharacterized protein	XM_009155639.1	XP_009153887	XP_009153887.1	XP_009153887.1	XP_009153887.1	hypothetical protein	hypothetical protein
XP_009153889.1	5970.XP_009153889.1	https://smart.embl.de/smart/DDvec.cgi?smart=359:Pfam_adh_short(28|170)+	Uncharacterized protein	20306260	20306260	684160023	GI:684160023	GeneID:20306260	GeneID:20306260	H6BSX9	H6BSX9_EXODN	HMPREF1120_01621	HMPREF1120_01621	Hypothetical protein	Uncharacterized protein	XM_009155641.1	XP_009153889	XP_009153889.1	XP_009153889.1	XP_009153889.1	hypothetical protein	hypothetical protein
XP_009153890.1	5970.XP_009153890.1	http://smart.embl.de/smart/DDt.cgi?smart=264:	Uncharacterized protein	20306261	20306261	684160025	GI:684160025	GeneID:20306261	GeneID:20306261	H6BSY0	H6BSY0_EXODN	HMPREF1120_01622	HMPREF1120_01622	Hypothetical protein	Uncharacterized protein	XM_009155642.1	XP_009153890	XP_009153890.1	XP_009153890.1	XP_009153890.1	hypothetical protein	hypothetical protein
XP_009153893.1	5970.XP_009153893.1	https://smart.embl.de/smart/DDvec.cgi?smart=383:Pfam_ADH_N(36|164)+Pfam_ADH_zinc_N(206|342)+	S-(hydroxymethyl)glutathione dehydrogenase; Belongs to the zinc-containing alcohol dehydrogenase family. Class-III subfamily	20306264	20306264	684160031	GI:684160031	GeneID:20306264	GeneID:20306264	H6BSY3	H6BSY3_EXODN	HMPREF1120_01625	HMPREF1120_01625	S-(hydroxymethyl)glutathione dehydrogenase	S-(hydroxymethyl)glutathione dehydrogenase	S-(hydroxymethyl)glutathione dehydrogenase	XM_009155645.1	XP_009153893	XP_009153893.1	XP_009153893.1	XP_009153893.1
XP_009153895.1	5970.XP_009153895.1	https://smart.embl.de/smart/DDvec.cgi?smart=207:UBQ(21|91)+Pfam_zf-AN1(143|183)+	Uncharacterized protein	20306266	20306266	684160035	GI:684160035	GeneID:20306266	GeneID:20306266	H6BSY5	H6BSY5_EXODN	HMPREF1120_01627	HMPREF1120_01627	Hypothetical protein	Uncharacterized protein	XM_009155647.1	XP_009153895	XP_009153895.1	XP_009153895.1	XP_009153895.1	hypothetical protein	hypothetical protein
XP_009153896.1	5970.XP_009153896.1	https://smart.embl.de/smart/DDvec.cgi?smart=455:Tubulin(48|246)+Tubulin_C(248|392)+	Tubulin gamma chain; Tubulin is the major constituent of microtubules. The gamma chain is found at microtubule organizing centers (MTOC) such as the spindle poles or the centrosome	20306267	20306267	684160037	GI:684160037	GeneID:20306267	GeneID:20306267	H6BSY6	H6BSY6_EXODN	HMPREF1120_01628	HMPREF1120_01628	Tubulin gamma chain	Tubulin gamma chain	XM_009155648.1	XP_009153896	XP_009153896.1	XP_009153896.1	XP_009153896.1	tubulin gamma chain	tubulin gamma chain
XP_009153897.1	5970.XP_009153897.1	https://smart.embl.de/smart/DDvec.cgi?smart=427:SIGNAL(1|22)+Pfam_GDPD(130|360)+TRANS(382|399)+	Glycerophosphoryl diester phosphodiesterase	20306268	20306268	684160039	GI:684160039	GeneID:20306268	GeneID:20306268	Glycerophosphoryl diester phosphodiesterase	Glycerophosphoryl diester phosphodiesterase	H6BSY7	H6BSY7_EXODN	HMPREF1120_01629	HMPREF1120_01629	XM_009155649.1	XP_009153897	XP_009153897.1	XP_009153897.1	XP_009153897.1	glycerophosphoryl diester phosphodiesterase	glycerophosphoryl diester phosphodiesterase
XP_009153914.1	5970.XP_009153914.1	https://smart.embl.de/smart/DDvec.cgi?smart=861:GAL4(18|62)+COIL(64|102)+Fungal_trans(314|387)+	Transcriptional regulatory protein CAT8	20306285	20306285	684160073	GI:684160073	GeneID:20306285	GeneID:20306285	H6BT04	H6BT04_EXODN	HMPREF1120_01646	HMPREF1120_01646	Transcriptional regulatory protein CAT8	Transcriptional regulatory protein CAT8	XM_009155666.1	XP_009153914	XP_009153914.1	XP_009153914.1	XP_009153914.1	transcriptional regulatory protein CAT8	transcriptional regulatory protein CAT8
XP_009153932.1	5970.XP_009153932.1	https://smart.embl.de/smart/DDvec.cgi?smart=316:RRM(8|75)+RRM(103|173)+	Uncharacterized protein	20306302	20306302	684160109	GI:684160109	GeneID:20306302	GeneID:20306302	H6BT22	H6BT22_EXODN	HMPREF1120_01663	HMPREF1120_01663	Hypothetical protein	Uncharacterized protein	XM_009155684.1	XP_009153932	XP_009153932.1	XP_009153932.1	XP_009153932.1	hypothetical protein	hypothetical protein
XP_009153934.1	5970.XP_009153934.1	https://smart.embl.de/smart/DDvec.cgi?smart=549:Pfam_AA_permease(41|503)+	APA family basic amino acid/polyamine antiporter	20306304	20306304	684160113	APA family basic amino acid/polyamine antiporter	APA family basic amino acid/polyamine antiporter	APA family basic amino acid/polyamine antiporter	GI:684160113	GeneID:20306304	GeneID:20306304	H6BT77	H6BT77_EXODN	HMPREF1120_01665	HMPREF1120_01665	XM_009155686.1	XP_009153934	XP_009153934.1	XP_009153934.1	XP_009153934.1
XP_009153939.1	5970.XP_009153939.1	https://smart.embl.de/smart/DDvec.cgi?smart=860:HOX(170|235)+ZnF_C2H2(382|405)+ZnF_C2H2(495|517)+	Uncharacterized protein	20306309	20306309	684160123	GI:684160123	GeneID:20306309	GeneID:20306309	H6BT82	H6BT82_EXODN	HMPREF1120_01670	HMPREF1120_01670	Hypothetical protein	Uncharacterized protein	XM_009155691.1	XP_009153939	XP_009153939.1	XP_009153939.1	XP_009153939.1	hypothetical protein	hypothetical protein
XP_009153942.1	5970.XP_009153942.1	https://smart.embl.de/smart/DDvec.cgi?smart=292:Pfam_adh_short(6|171)+Pfam_adh_short(193|258)+	Carbonyl reductase (NADPH); Belongs to the short-chain dehydrogenases/reductases (SDR) family	20306312	20306312	684160129	Carbonyl reductase (NADPH)	Carbonyl reductase (NADPH)	GI:684160129	GeneID:20306312	GeneID:20306312	H6BT85	H6BT85_EXODN	HMPREF1120_01673	HMPREF1120_01673	XM_009155694.1	XP_009153942	XP_009153942.1	XP_009153942.1	XP_009153942.1	carbonyl reductase (NADPH)	carbonyl reductase (NADPH)
XP_009153952.1	5970.XP_009153952.1	https://smart.embl.de/smart/DDvec.cgi?smart=443:Pfam_Glyco_hydro_72(14|311)+TRANS(423|442)+	1,3-beta-glucanosyltransferase; Splits internally a 1,3-beta-glucan molecule and transfers the newly generated reducing end (the donor) to the non- reducing end of another 1,3-beta-glucan molecule (the acceptor) forming a 1,3-beta linkage, resulting in the elongation of 1,3- beta-glucan chains in the cell wall	1,3-beta-glucanosyltransferase	20306321	20306321	684160149	GI:684160149	GeneID:20306321	GeneID:20306321	H6BT95	H6BT95_EXODN	HMPREF1120_01682	HMPREF1120_01682	Hypothetical protein	XM_009155704.1	XP_009153952	XP_009153952.1	XP_009153952.1	XP_009153952.1	hypothetical protein	hypothetical protein
XP_009153953.1	5970.XP_009153953.1	http://smart.embl.de/smart/DDt.cgi?smart=608:	Uncharacterized protein	20306322	20306322	684160151	GI:684160151	GeneID:20306322	GeneID:20306322	H6BT96	H6BT96_EXODN	HMPREF1120_01683	HMPREF1120_01683	Hypothetical protein	Uncharacterized protein	XM_009155705.1	XP_009153953	XP_009153953.1	XP_009153953.1	XP_009153953.1	hypothetical protein	hypothetical protein
XP_009153954.1	5970.XP_009153954.1	https://smart.embl.de/smart/DDvec.cgi?smart=444:Pfam_Aminotran_1_2(9|431)+	Valine-pyruvate aminotransferase	20306323	20306323	684160153	GI:684160153	GeneID:20306323	GeneID:20306323	H6BT98	H6BT98_EXODN	HMPREF1120_01684	HMPREF1120_01684	Valine-pyruvate aminotransferase	Valine-pyruvate aminotransferase	XM_009155706.1	XP_009153954	XP_009153954.1	XP_009153954.1	XP_009153954.1	valine-pyruvate aminotransferase	valine-pyruvate aminotransferase
XP_009153955.1	5970.XP_009153955.1	https://smart.embl.de/smart/DDvec.cgi?smart=425:Pfam_Fungal_trans_2(1|425)+	Uncharacterized protein	20306324	20306324	684160155	GI:684160155	GeneID:20306324	GeneID:20306324	H6BT97	H6BT97_EXODN	HMPREF1120_01685	HMPREF1120_01685	Hypothetical protein	Uncharacterized protein	XM_009155707.1	XP_009153955	XP_009153955.1	XP_009153955.1	XP_009153955.1	hypothetical protein	hypothetical protein
XP_009153958.1	5970.XP_009153958.1	https://smart.embl.de/smart/DDvec.cgi?smart=466:COIL(63|110)+AAA(245|384)+	26S protease regulatory subunit 6A; Belongs to the AAA ATPase family	20306327	20306327	26S protease regulatory subunit 6A	26S protease regulatory subunit 6A	26S protease regulatory subunit 6A	684160161	GI:684160161	GeneID:20306327	GeneID:20306327	H6BTA1	H6BTA1_EXODN	HMPREF1120_01688	HMPREF1120_01688	XM_009155710.1	XP_009153958	XP_009153958.1	XP_009153958.1	XP_009153958.1
XP_009153982.1	5970.XP_009153982.1	https://smart.embl.de/smart/DDvec.cgi?smart=321:Pfam_DUF2263(58|184)+	Uncharacterized protein	20306349	20306349	684160209	GI:684160209	GeneID:20306349	GeneID:20306349	H6BTC5	H6BTC5_EXODN	HMPREF1120_01710	HMPREF1120_01710	Hypothetical protein	Uncharacterized protein	XM_009155734.1	XP_009153982	XP_009153982.1	XP_009153982.1	XP_009153982.1	hypothetical protein	hypothetical protein
XP_009153990.1	5970.XP_009153990.1	https://smart.embl.de/smart/DDvec.cgi?smart=631:Pfam_FAD_binding_3(11|406)+	Monooxygenase	20306357	20306357	684160225	GI:684160225	GeneID:20306357	GeneID:20306357	H6BP74	H6BP74_EXODN	HMPREF1120_01718	HMPREF1120_01718	Monooxygenase	Monooxygenase	XM_009155742.1	XP_009153990	XP_009153990.1	XP_009153990.1	XP_009153990.1	monooxygenase	monooxygenase
XP_009153996.1	5970.XP_009153996.1	https://smart.embl.de/smart/DDvec.cgi?smart=567:GAL4(95|139)+Pfam_Fungal_trans_2(181|324)+	Uncharacterized protein	20306363	20306363	684160237	GI:684160237	GeneID:20306363	GeneID:20306363	H6BP80	H6BP80_EXODN	HMPREF1120_01724	HMPREF1120_01724	Hypothetical protein	Uncharacterized protein	XM_009155748.1	XP_009153996	XP_009153996.1	XP_009153996.1	XP_009153996.1	hypothetical protein	hypothetical protein
XP_009153997.1	5970.XP_009153997.1	https://smart.embl.de/smart/DDvec.cgi?smart=491:Pfam_Abhydrolase_3(156|398)+	Lipase/esterase	20306364	20306364	684160239	GI:684160239	GeneID:20306364	GeneID:20306364	H6BP81	H6BP81_EXODN	HMPREF1120_01725	HMPREF1120_01725	Lipase/esterase	Lipase/esterase	XM_009155749.1	XP_009153997	XP_009153997.1	XP_009153997.1	XP_009153997.1	lipase/esterase	lipase/esterase
XP_009154016.1	5970.XP_009154016.1	https://smart.embl.de/smart/DDvec.cgi?smart=1209:Pfam_Methyltransf_11(780|891)+	Uncharacterized protein	20306383	20306383	684160277	GI:684160277	GeneID:20306383	GeneID:20306383	H6BPA0	H6BPA0_EXODN	HMPREF1120_01744	HMPREF1120_01744	Hypothetical protein	Uncharacterized protein	XM_009155768.1	XP_009154016	XP_009154016.1	XP_009154016.1	XP_009154016.1	hypothetical protein	hypothetical protein
XP_009154017.1	5970.XP_009154017.1	https://smart.embl.de/smart/DDvec.cgi?smart=510:Pfam_Amidohydro_1(62|175)+Pfam_Amidohydro_1(212|431)+	Chlorohydrolase	20306384	20306384	684160279	Chlorohydrolase	Chlorohydrolase	GI:684160279	GeneID:20306384	GeneID:20306384	H6BPA1	H6BPA1_EXODN	HMPREF1120_01745	HMPREF1120_01745	XM_009155769.1	XP_009154017	XP_009154017.1	XP_009154017.1	XP_009154017.1	chlorohydrolase	chlorohydrolase
XP_009154023.1	5970.XP_009154023.1	https://smart.embl.de/smart/DDvec.cgi?smart=1492:HATPase_c(51|152)+	Uncharacterized protein	20306390	20306390	684160291	GI:684160291	GeneID:20306390	GeneID:20306390	H6BPA7	H6BPA7_EXODN	HMPREF1120_01751	HMPREF1120_01751	Hypothetical protein	Uncharacterized protein	XM_009155775.1	XP_009154023	XP_009154023.1	XP_009154023.1	XP_009154023.1	hypothetical protein	hypothetical protein
XP_009154024.1	5970.XP_009154024.1	https://smart.embl.de/smart/DDvec.cgi?smart=1443:TRANS(116|138)+Pfam_DUF3433(154|250)+TRANS(590|612)+TRANS(707|729)+Pfam_DUF3433(757|847)+TRANS(1342|1364)+	Uncharacterized protein	20306391	20306391	684160293	GI:684160293	GeneID:20306391	GeneID:20306391	H6BPA8	H6BPA8_EXODN	HMPREF1120_01752	HMPREF1120_01752	Hypothetical protein	Uncharacterized protein	XM_009155776.1	XP_009154024	XP_009154024.1	XP_009154024.1	XP_009154024.1	hypothetical protein	hypothetical protein
XP_009154036.1	5970.XP_009154036.1	https://smart.embl.de/smart/DDvec.cgi?smart=215:Pfam_DNA_binding_1(15|93)+	methylated-DNA-[protein]-cysteine S-methyltransferase	20306403	20306403	684160317	GI:684160317	GeneID:20306403	GeneID:20306403	H6BPC0	H6BPC0_EXODN	HMPREF1120_01764	HMPREF1120_01764	XM_009155788.1	XP_009154036	XP_009154036.1	XP_009154036.1	XP_009154036.1
XP_009154046.1	5970.XP_009154046.1	https://smart.embl.de/smart/DDvec.cgi?smart=702:Pfam_NAD_kinase(324|624)+	NAD+ kinase	20306413	20306413	684160337	GI:684160337	GeneID:20306413	GeneID:20306413	H6BPI3	H6BPI3_EXODN	HMPREF1120_01774	HMPREF1120_01774	NAD+ kinase	NAD+ kinase	NAD+ kinase	XM_009155798.1	XP_009154046	XP_009154046.1	XP_009154046.1	XP_009154046.1
XP_009154047.1	5970.XP_009154047.1	https://smart.embl.de/smart/DDvec.cgi?smart=234:TRANS(12|34)+TRANS(49|71)+TRANS(108|130)+TRANS(150|172)+TRANS(174|193)+	Uncharacterized protein	20306414	20306414	684160339	GI:684160339	GeneID:20306414	GeneID:20306414	H6BPI4	H6BPI4_EXODN	HMPREF1120_01775	HMPREF1120_01775	Hypothetical protein	Uncharacterized protein	XM_009155799.1	XP_009154047	XP_009154047.1	XP_009154047.1	XP_009154047.1	hypothetical protein	hypothetical protein
XP_009154049.1	5970.XP_009154049.1	https://smart.embl.de/smart/DDvec.cgi?smart=362:Pfam_NAD_binding_10(37|198)+	Uncharacterized protein	20306416	20306416	684160343	GI:684160343	GeneID:20306416	GeneID:20306416	H6BPI6	H6BPI6_EXODN	HMPREF1120_01777	HMPREF1120_01777	Hypothetical protein	Uncharacterized protein	XM_009155801.1	XP_009154049	XP_009154049.1	XP_009154049.1	XP_009154049.1	hypothetical protein	hypothetical protein
XP_009154051.1	5970.XP_009154051.1	https://smart.embl.de/smart/DDvec.cgi?smart=244:Pfam_Methyltransf_24(78|205)+	Uncharacterized protein	20306418	20306418	684160347	GI:684160347	GeneID:20306418	GeneID:20306418	H6BPI8	H6BPI8_EXODN	HMPREF1120_01779	HMPREF1120_01779	Hypothetical protein	Uncharacterized protein	XM_009155803.1	XP_009154051	XP_009154051.1	XP_009154051.1	XP_009154051.1	hypothetical protein	hypothetical protein
XP_009154060.1	5970.XP_009154060.1	https://smart.embl.de/smart/DDvec.cgi?smart=402:COIL(284|320)+	Uncharacterized protein	20306427	20306427	684160365	GI:684160365	GeneID:20306427	GeneID:20306427	H6BPJ7	H6BPJ7_EXODN	HMPREF1120_01788	HMPREF1120_01788	Hypothetical protein	Uncharacterized protein	XM_009155812.1	XP_009154060	XP_009154060.1	XP_009154060.1	XP_009154060.1	hypothetical protein	hypothetical protein
XP_009154061.1	5970.XP_009154061.1	https://smart.embl.de/smart/DDvec.cgi?smart=715:AAA(230|434)+Pfam_AAA_12(475|684)+	Uncharacterized protein	20306428	20306428	684160367	GI:684160367	GeneID:20306428	GeneID:20306428	H6BPJ8	H6BPJ8_EXODN	HMPREF1120_01789	HMPREF1120_01789	Hypothetical protein	Uncharacterized protein	XM_009155813.1	XP_009154061	XP_009154061.1	XP_009154061.1	XP_009154061.1	hypothetical protein	hypothetical protein
XP_009154062.1	5970.XP_009154062.1	https://smart.embl.de/smart/DDvec.cgi?smart=391:Pfam_UDPG_MGDP_dh_N(8|166)+Pfam_UDPG_MGDP_dh(181|269)+UDPG_MGDP_dh_C(297|390)+	UDP-N-acetyl-D-mannosamine 6-dehydrogenase	20306429	20306429	684160369	GI:684160369	GeneID:20306429	GeneID:20306429	H6BPJ9	H6BPJ9_EXODN	HMPREF1120_01790	HMPREF1120_01790	UDP-N-acetyl-D-mannosamine 6-dehydrogenase	UDP-N-acetyl-D-mannosamine 6-dehydrogenase	UDP-glucose 6-dehydrogenase	XM_009155814.1	XP_009154062	XP_009154062.1	XP_009154062.1	XP_009154062.1
NTH1	5970.XP_009154065.1	https://smart.embl.de/smart/DDvec.cgi?smart=468:ENDO3c(224|391)+	Endonuclease III homolog; Bifunctional DNA N-glycosylase with associated apurinic/apyrimidinic (AP) lyase function that catalyzes the first step in base excision repair (BER), the primary repair pathway for the repair of oxidative DNA damage. The DNA N-glycosylase activity releases the damaged DNA base from DNA by cleaving the N- glycosidic bond, leaving an AP site. The AP lyase activity cleaves …	20306432	20306432	684160375	Endonuclease III	Endonuclease III homolog	GI:684160375	GeneID:20306432	GeneID:20306432	H6BPK2	H6BPK2_EXODN	HMPREF1120_01793	HMPREF1120_01793	NTH1	XM_009155817.1	XP_009154065	XP_009154065.1	XP_009154065.1	XP_009154065.1	endonuclease III	endonuclease III
XP_009154070.1	5970.XP_009154070.1	https://smart.embl.de/smart/DDvec.cgi?smart=424:BAR(5|247)+SH3(368|424)+	Uncharacterized protein	20306437	20306437	684160385	GI:684160385	GeneID:20306437	GeneID:20306437	H6BPK7	H6BPK7_EXODN	HMPREF1120_01798	HMPREF1120_01798	Hypothetical protein	Uncharacterized protein	XM_009155822.1	XP_009154070	XP_009154070.1	XP_009154070.1	XP_009154070.1	hypothetical protein	hypothetical protein
XP_009154071.1	5970.XP_009154071.1	https://smart.embl.de/smart/DDvec.cgi?smart=515:Pfam_Beta_elim_lyase(149|329)+	Cysteine desulfurase	20306438	20306438	684160387	Cysteine desulfurase	Cysteine desulfurase	GI:684160387	GeneID:20306438	GeneID:20306438	H6BPK8	H6BPK8_EXODN	HMPREF1120_01799	HMPREF1120_01799	XM_009155823.1	XP_009154071	XP_009154071.1	XP_009154071.1	XP_009154071.1	cysteine desulfurase	cysteine desulfurase
XP_009154072.1	5970.XP_009154072.1	https://smart.embl.de/smart/DDvec.cgi?smart=366:Pfam_ADH_N(29|143)+Pfam_ADH_zinc_N(183|317)+	L-iditol 2-dehydrogenase	20306439	20306439	684160389	GI:684160389	GeneID:20306439	GeneID:20306439	H6BPK9	H6BPK9_EXODN	HMPREF1120_01800	HMPREF1120_01800	L-iditol 2-dehydrogenase	L-iditol 2-dehydrogenase	L-iditol 2-dehydrogenase	XM_009155824.1	XP_009154072	XP_009154072.1	XP_009154072.1	XP_009154072.1
XP_009154081.1	5970.XP_009154081.1	https://smart.embl.de/smart/DDvec.cgi?smart=321:Pfam_Fungal_trans(184|302)+	Uncharacterized protein	20306447	20306447	684160407	GI:684160407	GeneID:20306447	GeneID:20306447	H6BPL8	H6BPL8_EXODN	HMPREF1120_01808	HMPREF1120_01808	Hypothetical protein	Uncharacterized protein	XM_009155833.1	XP_009154081	XP_009154081.1	XP_009154081.1	XP_009154081.1	hypothetical protein	hypothetical protein
XP_009154082.1	5970.XP_009154082.1	http://smart.embl.de/smart/DDt.cgi?smart=351:	Uncharacterized protein	20306448	20306448	684160409	GI:684160409	GeneID:20306448	GeneID:20306448	H6BPL9	H6BPL9_EXODN	HMPREF1120_01809	HMPREF1120_01809	Hypothetical protein	Uncharacterized protein	XM_009155834.1	XP_009154082	XP_009154082.1	XP_009154082.1	XP_009154082.1	hypothetical protein	hypothetical protein
XP_009154084.1	5970.XP_009154084.1	https://smart.embl.de/smart/DDvec.cgi?smart=587:Pfam_Transp_cyt_pur(38|492)+	NCS1 family nucleobase:cation symporter-1	20306450	20306450	684160413	GI:684160413	GeneID:20306450	GeneID:20306450	H6BPM1	H6BPM1_EXODN	HMPREF1120_01811	HMPREF1120_01811	NCS1 family nucleobase:cation symporter-1	NCS1 family nucleobase:cation symporter-1	NCS1 family nucleobase:cation symporter-1	XM_009155836.1	XP_009154084	XP_009154084.1	XP_009154084.1	XP_009154084.1
XP_009154086.1	5970.XP_009154086.1	https://smart.embl.de/smart/DDvec.cgi?smart=461:TRANS(58|80)+Pfam_DUF3445(155|399)+	Alpha-1,2-mannosyltransferase	20306452	20306452	684160417	Alpha-1,2-mannosyltransferase	Alpha-1,2-mannosyltransferase	GI:684160417	GeneID:20306452	GeneID:20306452	H6BPM3	H6BPM3_EXODN	HMPREF1120_01813	HMPREF1120_01813	XM_009155838.1	XP_009154086	XP_009154086.1	XP_009154086.1	XP_009154086.1	alpha-1,2-mannosyltransferase	alpha-1,2-mannosyltransferase
XP_009154087.1	5970.XP_009154087.1	https://smart.embl.de/smart/DDvec.cgi?smart=556:Pfam_Exo5(80|506)+	Uncharacterized protein	20306453	20306453	684160419	GI:684160419	GeneID:20306453	GeneID:20306453	H6BPM4	H6BPM4_EXODN	HMPREF1120_01814	HMPREF1120_01814	Hypothetical protein	Uncharacterized protein	XM_009155839.1	XP_009154087	XP_009154087.1	XP_009154087.1	XP_009154087.1	hypothetical protein	hypothetical protein
XP_009154088.1	5970.XP_009154088.1	https://smart.embl.de/smart/DDvec.cgi?smart=281:Pfam_Mpv17_PMP22(192|253)+	Uncharacterized protein; Belongs to the peroxisomal membrane protein PXMP2/4 family	20306454	20306454	684160421	GI:684160421	GeneID:20306454	GeneID:20306454	H6BPM5	H6BPM5_EXODN	HMPREF1120_01815	HMPREF1120_01815	Hypothetical protein	Uncharacterized protein	XM_009155840.1	XP_009154088	XP_009154088.1	XP_009154088.1	XP_009154088.1	hypothetical protein	hypothetical protein
XP_009154091.1	5970.XP_009154091.1	https://smart.embl.de/smart/DDvec.cgi?smart=542:ZnF_C2H2(416|441)+ZnF_C2H2(464|495)+ZnF_C2H2(502|527)+	26S proteasome regulatory subunit N4	20306457	20306457	26S proteasome regulatory subunit N4	26S proteasome regulatory subunit N4	26S proteasome regulatory subunit N4	684160427	GI:684160427	GeneID:20306457	GeneID:20306457	H6BPM8	H6BPM8_EXODN	HMPREF1120_01818	HMPREF1120_01818	XM_009155843.1	XP_009154091	XP_009154091.1	XP_009154091.1	XP_009154091.1
XP_009154100.1	5970.XP_009154100.1	https://smart.embl.de/smart/DDvec.cgi?smart=1454:COIL(269|301)+COIL(565|601)+COIL(688|829)+COIL(869|1009)+Pfam_ATG11(1125|1276)+	Autophagy-like protein 11	20306466	20306466	684160445	Autophagy-like protein 11	Autophagy-like protein 11	GI:684160445	GeneID:20306466	GeneID:20306466	H6BPN7	H6BPN7_EXODN	HMPREF1120_01827	HMPREF1120_01827	XM_009155852.1	XP_009154100	XP_009154100.1	XP_009154100.1	XP_009154100.1	autophagy-like protein 11	autophagy-like protein 11
XP_009154102.1	5970.XP_009154102.1	http://smart.embl.de/smart/DDt.cgi?smart=517:	Uncharacterized protein	20306468	20306468	684160449	GI:684160449	GeneID:20306468	GeneID:20306468	H6BPN9	H6BPN9_EXODN	HMPREF1120_01829	HMPREF1120_01829	Hypothetical protein	Uncharacterized protein	XM_009155854.1	XP_009154102	XP_009154102.1	XP_009154102.1	XP_009154102.1	hypothetical protein	hypothetical protein
XP_009154106.1	5970.XP_009154106.1	http://smart.embl.de/smart/DDt.cgi?smart=586:	Uncharacterized protein	20306472	20306472	684160457	GI:684160457	GeneID:20306472	GeneID:20306472	H6BPP3	H6BPP3_EXODN	HMPREF1120_01833	HMPREF1120_01833	Hypothetical protein	Uncharacterized protein	XM_009155858.1	XP_009154106	XP_009154106.1	XP_009154106.1	XP_009154106.1	hypothetical protein	hypothetical protein
XP_009154143.1	5970.XP_009154143.1	https://smart.embl.de/smart/DDvec.cgi?smart=518:Pfam_Peptidase_C1_2(60|515)+	Bleomycin hydrolase	20306506	20306506	684160531	Bleomycin hydrolase	Bleomycin hydrolase	GI:684160531	GeneID:20306506	GeneID:20306506	H6BPT0	H6BPT0_EXODN	HMPREF1120_01867	HMPREF1120_01867	XM_009155895.1	XP_009154143	XP_009154143.1	XP_009154143.1	XP_009154143.1	bleomycin hydrolase	bleomycin hydrolase
XP_009154145.1	5970.XP_009154145.1	https://smart.embl.de/smart/DDvec.cgi?smart=439:Pfam_Thiolase_N(46|305)+Pfam_Thiolase_C(314|434)+	acetyl-CoA C-acetyltransferase; Belongs to the thiolase family	20306508	20306508	684160535	Acetyl-CoA C-acetyltransferase	GI:684160535	GeneID:20306508	GeneID:20306508	H6BPT2	H6BPT2_EXODN	HMPREF1120_01869	HMPREF1120_01869	XM_009155897.1	XP_009154145	XP_009154145.1	XP_009154145.1	XP_009154145.1	acetyl-CoA C-acetyltransferase	acetyl-CoA C-acetyltransferase
XP_009154148.1	5970.XP_009154148.1	https://smart.embl.de/smart/DDvec.cgi?smart=710:Pfam_Amidase(75|346)+Pfam_Amidase(366|468)+	glutamyl-tRNA (Gln) amidotransferase	20306511	20306511	684160541	GI:684160541	GeneID:20306511	GeneID:20306511	Glutamyl-tRNA (Gln) amidotransferase	H6BPW4	H6BPW4_EXODN	HMPREF1120_01872	HMPREF1120_01872	XM_009155900.1	XP_009154148	XP_009154148.1	XP_009154148.1	XP_009154148.1	glutamyl-tRNA (Gln) amidotransferase	glutamyl-tRNA (Gln) amidotransferase
XP_009154151.1	5970.XP_009154151.1	https://smart.embl.de/smart/DDvec.cgi?smart=522:Pfam_FAD_binding_4(56|192)+Pfam_BBE(471|510)+	FAD binding domain-containing protein; Belongs to the oxygen-dependent FAD-linked oxidoreductase family	20306514	20306514	684160547	FAD binding domain-containing protein	FAD binding domain-containing protein	FAD binding domain-containing protein	GI:684160547	GeneID:20306514	GeneID:20306514	H6BPW7	H6BPW7_EXODN	HMPREF1120_01875	HMPREF1120_01875	XM_009155903.1	XP_009154151	XP_009154151.1	XP_009154151.1	XP_009154151.1
XP_009154152.1	5970.XP_009154152.1	https://smart.embl.de/smart/DDvec.cgi?smart=516:Pfam_2OG-FeII_Oxy_2(155|417)+Pfam_zf-GRF(429|476)+	Uncharacterized protein	20306515	20306515	684160549	GI:684160549	GeneID:20306515	GeneID:20306515	H6BPW8	H6BPW8_EXODN	HMPREF1120_01876	HMPREF1120_01876	Hypothetical protein	Uncharacterized protein	XM_009155904.1	XP_009154152	XP_009154152.1	XP_009154152.1	XP_009154152.1	hypothetical protein	hypothetical protein
XP_009154165.1	5970.XP_009154165.1	https://smart.embl.de/smart/DDvec.cgi?smart=190:Pfam_KxDL(96|181)+	Uncharacterized protein	20306528	20306528	684160575	GI:684160575	GeneID:20306528	GeneID:20306528	H6BPY1	H6BPY1_EXODN	HMPREF1120_01889	HMPREF1120_01889	Hypothetical protein	Uncharacterized protein	XM_009155917.1	XP_009154165	XP_009154165.1	XP_009154165.1	XP_009154165.1	hypothetical protein	hypothetical protein
XP_009154172.1	5970.XP_009154172.1	http://smart.embl.de/smart/DDt.cgi?smart=471:	Uncharacterized protein	20306535	20306535	684160589	GI:684160589	GeneID:20306535	GeneID:20306535	H6BPY8	H6BPY8_EXODN	HMPREF1120_01896	HMPREF1120_01896	Hypothetical protein	Uncharacterized protein	XM_009155924.1	XP_009154172	XP_009154172.1	XP_009154172.1	XP_009154172.1	hypothetical protein	hypothetical protein
XP_009154173.1	5970.XP_009154173.1	http://smart.embl.de/smart/DDt.cgi?smart=108:	Uncharacterized protein	20306536	20306536	684160591	GI:684160591	GeneID:20306536	GeneID:20306536	H6BPY9	H6BPY9_EXODN	HMPREF1120_01897	HMPREF1120_01897	Hypothetical protein	Uncharacterized protein	XM_009155925.1	XP_009154173	XP_009154173.1	XP_009154173.1	XP_009154173.1	hypothetical protein	hypothetical protein
XP_009154174.1	5970.XP_009154174.1	https://smart.embl.de/smart/DDvec.cgi?smart=557:TRANS(25|47)+TRANS(59|81)+TRANS(104|126)+TRANS(139|161)+TRANS(188|210)+TRANS(222|241)+TRANS(256|278)+	Uncharacterized protein	20306537	20306537	684160593	GI:684160593	GeneID:20306537	GeneID:20306537	H6BPZ0	H6BPZ0_EXODN	HMPREF1120_01898	HMPREF1120_01898	Hypothetical protein	Uncharacterized protein	XM_009155926.1	XP_009154174	XP_009154174.1	XP_009154174.1	XP_009154174.1	hypothetical protein	hypothetical protein
XP_009154175.1	5970.XP_009154175.1	https://smart.embl.de/smart/DDvec.cgi?smart=470:Pfam_DUF3669(355|436)+	Uncharacterized protein	20306538	20306538	684160595	GI:684160595	GeneID:20306538	GeneID:20306538	H6BPZ1	H6BPZ1_EXODN	HMPREF1120_01899	HMPREF1120_01899	Hypothetical protein	Uncharacterized protein	XM_009155927.1	XP_009154175	XP_009154175.1	XP_009154175.1	XP_009154175.1	hypothetical protein	hypothetical protein
XP_009154180.1	5970.XP_009154180.1	https://smart.embl.de/smart/DDvec.cgi?smart=895:TBC(203|414)+COIL(568|620)+COIL(672|737)+COIL(808|841)+	Uncharacterized protein	20306543	20306543	684160605	GI:684160605	GeneID:20306543	GeneID:20306543	H6BPZ6	H6BPZ6_EXODN	HMPREF1120_01904	HMPREF1120_01904	Hypothetical protein	Uncharacterized protein	XM_009155932.1	XP_009154180	XP_009154180.1	XP_009154180.1	XP_009154180.1	hypothetical protein	hypothetical protein
XP_009154181.1	5970.XP_009154181.1	http://smart.embl.de/smart/DDt.cgi?smart=664:	Uncharacterized protein	20306544	20306544	684160607	GI:684160607	GeneID:20306544	GeneID:20306544	H6BPZ7	H6BPZ7_EXODN	HMPREF1120_01905	HMPREF1120_01905	Hypothetical protein	Uncharacterized protein	XM_009155933.1	XP_009154181	XP_009154181.1	XP_009154181.1	XP_009154181.1	hypothetical protein	hypothetical protein
XP_009154183.1	5970.XP_009154183.1	http://smart.embl.de/smart/DDt.cgi?smart=486:	Uncharacterized protein	20306546	20306546	684160611	GI:684160611	GeneID:20306546	GeneID:20306546	H6BQ00	H6BQ00_EXODN	HMPREF1120_01907	HMPREF1120_01907	Hypothetical protein	Uncharacterized protein	XM_009155936.1	XP_009154183	XP_009154183.1	XP_009154183.1	XP_009154183.1	XP_009154184.1	hypothetical protein	hypothetical protein
XP_009154186.1	5970.XP_009154186.1	https://smart.embl.de/smart/DDvec.cgi?smart=327:SIGNAL(1|19)+Pfam_Lipase_GDSL_2(33|309)+	Uncharacterized protein	20306548	20306548	684160617	GI:684160617	GeneID:20306548	GeneID:20306548	H6BQ02	H6BQ02_EXODN	HMPREF1120_01909	HMPREF1120_01909	Hypothetical protein	Uncharacterized protein	XM_009155938.1	XP_009154186	XP_009154186.1	XP_009154186.1	XP_009154186.1	hypothetical protein	hypothetical protein
XP_009154187.1	5970.XP_009154187.1	https://smart.embl.de/smart/DDvec.cgi?smart=845:Pfam_CDC45(26|840)+	Cell division control protein 45	20306549	20306549	684160619	Cell division control protein 45	Cell division control protein 45	GI:684160619	GeneID:20306549	GeneID:20306549	H6BQ03	H6BQ03_EXODN	HMPREF1120_01910	HMPREF1120_01910	XM_009155939.1	XP_009154187	XP_009154187.1	XP_009154187.1	XP_009154187.1	cell division control protein 45	cell division control protein 45
XP_009154188.1	5970.XP_009154188.1	https://smart.embl.de/smart/DDvec.cgi?smart=254:TRANS(7|28)+Pfam_Polysacc_deac_1(48|178)+	Polysaccharide deacetylase	20306550	20306550	684160621	GI:684160621	GeneID:20306550	GeneID:20306550	H6BQ04	H6BQ04_EXODN	HMPREF1120_01911	HMPREF1120_01911	Polysaccharide deacetylase	Polysaccharide deacetylase	XM_009155940.1	XP_009154188	XP_009154188.1	XP_009154188.1	XP_009154188.1	polysaccharide deacetylase	polysaccharide deacetylase
XP_009154200.1	5970.XP_009154200.1	https://smart.embl.de/smart/DDvec.cgi?smart=302:Aldolase_II(65|247)+	L-fuculose-phosphate aldolase	20306562	20306562	684160645	GI:684160645	GeneID:20306562	GeneID:20306562	H6BQ16	H6BQ16_EXODN	HMPREF1120_01923	HMPREF1120_01923	L-fuculose-phosphate aldolase	L-fuculose-phosphate aldolase	L-fuculose-phosphate aldolase	XM_009155952.1	XP_009154200	XP_009154200.1	XP_009154200.1	XP_009154200.1
XP_009154206.1	5970.XP_009154206.1	https://smart.embl.de/smart/DDvec.cgi?smart=659:Aamy(30|457)+	Trehalose-6-phosphate hydrolase	20306568	20306568	684160657	GI:684160657	GeneID:20306568	GeneID:20306568	H6BQ75	H6BQ75_EXODN	HMPREF1120_01929	HMPREF1120_01929	Trehalose-6-phosphate hydrolase	Trehalose-6-phosphate hydrolase	XM_009155958.1	XP_009154206	XP_009154206.1	XP_009154206.1	XP_009154206.1	trehalose-6-phosphate hydrolase	trehalose-6-phosphate hydrolase
XP_009154208.1	5970.XP_009154208.1	https://smart.embl.de/smart/DDvec.cgi?smart=316:Pfam_PhyH(42|245)+	Uncharacterized protein	20306570	20306570	684160661	GI:684160661	GeneID:20306570	GeneID:20306570	H6BQ77	H6BQ77_EXODN	HMPREF1120_01931	HMPREF1120_01931	Hypothetical protein	Uncharacterized protein	XM_009155960.1	XP_009154208	XP_009154208.1	XP_009154208.1	XP_009154208.1	hypothetical protein	hypothetical protein
XP_009154226.1	5970.XP_009154226.1	https://smart.embl.de/smart/DDvec.cgi?smart=324:Pfam_adh_short(24|234)+	Short-chain dehydrogenase; Belongs to the short-chain dehydrogenases/reductases (SDR) family	20306588	20306588	684160697	GI:684160697	GeneID:20306588	GeneID:20306588	H6BQ95	H6BQ95_EXODN	HMPREF1120_01949	HMPREF1120_01949	Short-chain dehydrogenase	Short-chain dehydrogenase	XM_009155978.1	XP_009154226	XP_009154226.1	XP_009154226.1	XP_009154226.1	short-chain dehydrogenase	short-chain dehydrogenase
XP_009154228.1	5970.XP_009154228.1	https://smart.embl.de/smart/DDvec.cgi?smart=335:Pfam_Acetyltransf_2(46|318)+	N-hydroxyarylamine O-acetyltransferase	20306590	20306590	684160701	GI:684160701	GeneID:20306590	GeneID:20306590	H6BQ97	H6BQ97_EXODN	HMPREF1120_01951	HMPREF1120_01951	N-hydroxyarylamine O-acetyltransferase	N-hydroxyarylamine O-acetyltransferase	N-hydroxyarylamine O-acetyltransferase	XM_009155980.1	XP_009154228	XP_009154228.1	XP_009154228.1	XP_009154228.1
XP_009154231.1	5970.XP_009154231.1	https://smart.embl.de/smart/DDvec.cgi?smart=372:Pfam_ADH_N(31|146)+Pfam_ADH_zinc_N(197|329)+	Alcohol dehydrogenase	20306593	20306593	684160707	Alcohol dehydrogenase	Alcohol dehydrogenase	GI:684160707	GeneID:20306593	GeneID:20306593	H6BQA0	H6BQA0_EXODN	HMPREF1120_01954	HMPREF1120_01954	XM_009155983.1	XP_009154231	XP_009154231.1	XP_009154231.1	XP_009154231.1	alcohol dehydrogenase	alcohol dehydrogenase
XP_009154238.1	5970.XP_009154238.1	https://smart.embl.de/smart/DDvec.cgi?smart=602:Pfam_Sfi1(213|358)+Pfam_Sfi1(351|547)+	Uncharacterized protein	20306600	20306600	684160721	GI:684160721	GeneID:20306600	GeneID:20306600	H6BQA7	H6BQA7_EXODN	HMPREF1120_01961	HMPREF1120_01961	Hypothetical protein	Uncharacterized protein	XM_009155990.1	XP_009154238	XP_009154238.1	XP_009154238.1	XP_009154238.1	hypothetical protein	hypothetical protein
XP_009154256.1	5970.XP_009154256.1	https://smart.embl.de/smart/DDvec.cgi?smart=571:Fungal_trans(105|185)+	Uncharacterized protein	20306617	20306617	684160757	GI:684160757	GeneID:20306617	GeneID:20306617	H6BQH8	H6BQH8_EXODN	HMPREF1120_01978	HMPREF1120_01978	Hypothetical protein	Uncharacterized protein	XM_009156008.1	XP_009154256	XP_009154256.1	XP_009154256.1	XP_009154256.1	hypothetical protein	hypothetical protein
XP_009154258.1	5970.XP_009154258.1	https://smart.embl.de/smart/DDvec.cgi?smart=275:TRANS(196|218)+TRANS(228|245)+TRANS(252|274)+	Uncharacterized protein	20306619	20306619	684160761	GI:684160761	GeneID:20306619	GeneID:20306619	H6BQI0	H6BQI0_EXODN	HMPREF1120_01980	HMPREF1120_01980	Hypothetical protein	Uncharacterized protein	XM_009156010.1	XP_009154258	XP_009154258.1	XP_009154258.1	XP_009154258.1	hypothetical protein	hypothetical protein
XP_009154259.1	5970.XP_009154259.1	http://smart.embl.de/smart/DDt.cgi?smart=216:	Uncharacterized protein	20306620	20306620	684160763	GI:684160763	GeneID:20306620	GeneID:20306620	H6BQI1	H6BQI1_EXODN	HMPREF1120_01981	HMPREF1120_01981	Hypothetical protein	Uncharacterized protein	XM_009156011.1	XP_009154259	XP_009154259.1	XP_009154259.1	XP_009154259.1	hypothetical protein	hypothetical protein
XP_009154260.1	5970.XP_009154260.1	http://smart.embl.de/smart/DDt.cgi?smart=103:	Uncharacterized protein	20306621	20306621	684160765	GI:684160765	GeneID:20306621	GeneID:20306621	H6BQI2	H6BQI2_EXODN	HMPREF1120_01982	HMPREF1120_01982	Hypothetical protein	Uncharacterized protein	XM_009156012.1	XP_009154260	XP_009154260.1	XP_009154260.1	XP_009154260.1	hypothetical protein	hypothetical protein
XP_009154261.1	5970.XP_009154261.1	https://smart.embl.de/smart/DDvec.cgi?smart=192:COIL(151|185)+	Uncharacterized protein	20306622	20306622	684160767	GI:684160767	GeneID:20306622	GeneID:20306622	H6BQI3	H6BQI3_EXODN	HMPREF1120_01983	HMPREF1120_01983	Hypothetical protein	Uncharacterized protein	XM_009156013.1	XP_009154261	XP_009154261.1	XP_009154261.1	XP_009154261.1	hypothetical protein	hypothetical protein
XP_009154265.1	5970.XP_009154265.1	https://smart.embl.de/smart/DDvec.cgi?smart=589:COIL(359|389)+	Uncharacterized protein	20306626	20306626	684160775	GI:684160775	GeneID:20306626	GeneID:20306626	H6BQI7	H6BQI7_EXODN	HMPREF1120_01987	HMPREF1120_01987	Hypothetical protein	Uncharacterized protein	XM_009156017.1	XP_009154265	XP_009154265.1	XP_009154265.1	XP_009154265.1	hypothetical protein	hypothetical protein
XP_009154277.1	5970.XP_009154277.1	https://smart.embl.de/smart/DDvec.cgi?smart=292:Pfam_DUF1275(26|276)+	Uncharacterized protein	20306638	20306638	684160799	GI:684160799	GeneID:20306638	GeneID:20306638	H6BQJ9	H6BQJ9_EXODN	HMPREF1120_01999	HMPREF1120_01999	Hypothetical protein	Uncharacterized protein	XM_009156029.1	XP_009154277	XP_009154277.1	XP_009154277.1	XP_009154277.1	hypothetical protein	hypothetical protein
XP_009154285.1	5970.XP_009154285.1	https://smart.embl.de/smart/DDvec.cgi?smart=432:Pfam_RINGv(38|97)+	Uncharacterized protein	20306645	20306645	684160815	GI:684160815	GeneID:20306645	GeneID:20306645	H6BQK7	H6BQK7_EXODN	HMPREF1120_02006	HMPREF1120_02006	Hypothetical protein	Uncharacterized protein	XM_009156037.1	XP_009154285	XP_009154285.1	XP_009154285.1	XP_009154285.1	hypothetical protein	hypothetical protein
XP_009154294.1	5970.XP_009154294.1	https://smart.embl.de/smart/DDvec.cgi?smart=183:Pfam_Cupin_2(84|158)+	Uncharacterized protein; Prolyl oligopeptidase family; Region: Peptidase_S9; cl19144	20306652	20306653	20306653	223669	262791	267497	684160831	684160833	858893	CDD:223669	CDD:262791	CDD:267497	GI:684160831	GI:684160833	GeneID:20306652	GeneID:20306653	GeneID:20306653	H6BQL4	H6BQL4_EXODN	HMPREF1120_02014	HMPREF1120_02014	Hypothetical protein	Uncharacterized protein	XM_009156046.1	XP_009154294	XP_009154294.1	XP_009154294.1	XP_009154294.1	hypothetical protein	hypothetical protein	taxon:858893
XP_009154296.1	5970.XP_009154296.1	https://smart.embl.de/smart/DDvec.cgi?smart=699:Pfam_TPP_enzyme_N(101|269)+Pfam_TPP_enzyme_M(300|445)+Pfam_TPP_enzyme_C(508|657)+	Acetolactate synthase I/II/III large subunit	20306655	20306655	684160837	Acetolactate synthase	Acetolactate synthase I/II/III large subunit	GI:684160837	GeneID:20306655	GeneID:20306655	H6BQL8	H6BQL8_EXODN	HMPREF1120_02016	HMPREF1120_02016	XM_009156048.1	XP_009154296	XP_009154296.1	XP_009154296.1	XP_009154296.1	acetolactate synthase I/II/III large subunit	acetolactate synthase I/II/III large subunit
XP_009154299.1	5970.XP_009154299.1	https://smart.embl.de/smart/DDvec.cgi?smart=645:COIL(200|230)+TPR(354|387)+TPR(465|498)+TPR(507|540)+TPR(541|574)+	Uncharacterized protein	20306658	20306658	684160843	GI:684160843	GeneID:20306658	GeneID:20306658	H6BQM1	H6BQM1_EXODN	HMPREF1120_02019	HMPREF1120_02019	Hypothetical protein	Uncharacterized protein	XM_009156051.1	XP_009154299	XP_009154299.1	XP_009154299.1	XP_009154299.1	hypothetical protein	hypothetical protein
XP_009154300.1	5970.XP_009154300.1	https://smart.embl.de/smart/DDvec.cgi?smart=488:PX(64|184)+COIL(392|428)+	Sorting nexin-4	20306659	20306659	684160845	GI:684160845	GeneID:20306659	GeneID:20306659	H6BQM2	H6BQM2_EXODN	HMPREF1120_02020	HMPREF1120_02020	Sorting nexin-4	Sorting nexin-4	XM_009156052.1	XP_009154300	XP_009154300.1	XP_009154300.1	XP_009154300.1	sorting nexin-4	sorting nexin-4
XP_009154311.1	5970.XP_009154311.1	https://smart.embl.de/smart/DDvec.cgi?smart=756:Pfam_UCH(91|511)+COIL(606|678)+	Ubiquitin thiolesterase; Belongs to the peptidase C19 family	20306670	20306670	684160867	GI:684160867	GeneID:20306670	GeneID:20306670	H6BQT7	H6BQT7_EXODN	HMPREF1120_02031	HMPREF1120_02031	Ubiquitin thiolesterase	Ubiquitin thiolesterase	XM_009156063.1	XP_009154311	XP_009154311.1	XP_009154311.1	XP_009154311.1	ubiquitin thiolesterase	ubiquitin thiolesterase
XP_009154322.1	5970.XP_009154322.1	https://smart.embl.de/smart/DDvec.cgi?smart=487:Pfam_Vta1(13|157)+	Uncharacterized protein	20306679	20306680	20306680	684160887	684160889	858893	GI:684160887	GI:684160889	GeneID:20306679	GeneID:20306680	GeneID:20306680	H6BQU8	H6BQU8_EXODN	HMPREF1120_02041	HMPREF1120_02041	Hypothetical protein	Uncharacterized protein	XM_009156074.1	XP_009154322	XP_009154322.1	XP_009154322.1	XP_009154322.1	hypothetical protein	hypothetical protein	taxon:858893
XP_009154327.1	5970.XP_009154327.1	https://smart.embl.de/smart/DDvec.cgi?smart=360:SIGNAL(1|23)+TRANS(85|107)+TRANS(119|141)+TRANS(151|173)+TRANS(192|214)+TRANS(224|246)+	Uncharacterized protein	20306685	20306685	684160899	GI:684160899	GeneID:20306685	GeneID:20306685	H6BQV3	H6BQV3_EXODN	HMPREF1120_02046	HMPREF1120_02046	Hypothetical protein	Uncharacterized protein	XM_009156079.1	XP_009154327	XP_009154327.1	XP_009154327.1	XP_009154327.1	hypothetical protein	hypothetical protein
XP_009154328.1	5970.XP_009154328.1	https://smart.embl.de/smart/DDvec.cgi?smart=525:Pfam_GFO_IDH_MocA(12|157)+	NAD binding Rossmann fold oxidoreductase	20306686	20306686	684160901	GI:684160901	GeneID:20306686	GeneID:20306686	H6BQV4	H6BQV4_EXODN	HMPREF1120_02047	HMPREF1120_02047	NAD binding Rossmann fold oxidoreductase	NAD binding Rossmann fold oxidoreductase	NAD binding Rossmann fold oxidoreductase	XM_009156080.1	XP_009154328	XP_009154328.1	XP_009154328.1	XP_009154328.1
XP_009154331.1	5970.XP_009154331.1	https://smart.embl.de/smart/DDvec.cgi?smart=491:Pfam_Ammonium_transp(21|432)+	Amt family ammonium transporter	20306689	20306689	684160907	Amt family ammonium transporter	Amt family ammonium transporter	GI:684160907	GeneID:20306689	GeneID:20306689	H6BQV7	H6BQV7_EXODN	HMPREF1120_02050	HMPREF1120_02050	XM_009156083.1	XP_009154331	XP_009154331.1	XP_009154331.1	XP_009154331.1	amt family ammonium transporter	amt family ammonium transporter
XP_009154332.1	5970.XP_009154332.1	https://smart.embl.de/smart/DDvec.cgi?smart=380:zf-PARP(9|102)+	Uncharacterized protein	20306690	20306690	684160909	GI:684160909	GeneID:20306690	GeneID:20306690	H6BQV8	H6BQV8_EXODN	HMPREF1120_02051	HMPREF1120_02051	Hypothetical protein	Uncharacterized protein	XM_009156084.1	XP_009154332	XP_009154332.1	XP_009154332.1	XP_009154332.1	hypothetical protein	hypothetical protein
XP_009154333.1	5970.XP_009154333.1	https://smart.embl.de/smart/DDvec.cgi?smart=462:Pfam_Lactamase_B_2(145|419)+	Uncharacterized protein	20306691	20306691	684160911	GI:684160911	GeneID:20306691	GeneID:20306691	H6BQV9	H6BQV9_EXODN	HMPREF1120_02052	HMPREF1120_02052	Hypothetical protein	Uncharacterized protein	XM_009156085.1	XP_009154333	XP_009154333.1	XP_009154333.1	XP_009154333.1	hypothetical protein	hypothetical protein
XP_009154337.1	5970.XP_009154337.1	https://smart.embl.de/smart/DDvec.cgi?smart=60:TRANS(7|26)+	Uncharacterized protein	20306695	20306695	684160919	GI:684160919	GeneID:20306695	GeneID:20306695	H6BQW3	H6BQW3_EXODN	HMPREF1120_02056	HMPREF1120_02056	Hypothetical protein	Uncharacterized protein	XM_009156089.1	XP_009154337	XP_009154337.1	XP_009154337.1	XP_009154337.1	hypothetical protein	hypothetical protein
XP_009154339.1	5970.XP_009154339.1	https://smart.embl.de/smart/DDvec.cgi?smart=255:TRANS(22|44)+TRANS(69|91)+TRANS(103|125)+TRANS(140|162)+	Uncharacterized protein	20306697	20306697	684160923	GI:684160923	GeneID:20306697	GeneID:20306697	H6BQW4	H6BQW4_EXODN	HMPREF1120_02058	HMPREF1120_02058	Hypothetical protein	Uncharacterized protein	XM_009156091.1	XP_009154339	XP_009154339.1	XP_009154339.1	XP_009154339.1	hypothetical protein	hypothetical protein
XP_009154356.1	5970.XP_009154356.1	http://smart.embl.de/smart/DDt.cgi?smart=447:	Uncharacterized protein	20306714	20306714	684160957	GI:684160957	GeneID:20306714	GeneID:20306714	H6BQY3	H6BQY3_EXODN	HMPREF1120_02075	HMPREF1120_02075	Hypothetical protein	Uncharacterized protein	XM_009156108.1	XP_009154356	XP_009154356.1	XP_009154356.1	XP_009154356.1	hypothetical protein	hypothetical protein
XP_009154374.1	5970.XP_009154374.1	https://smart.embl.de/smart/DDvec.cgi?smart=171:SIGNAL(1|18)+	Uncharacterized protein	20306732	20306732	684160993	GI:684160993	GeneID:20306732	GeneID:20306732	H6BR53	H6BR53_EXODN	HMPREF1120_02093	HMPREF1120_02093	Hypothetical protein	Uncharacterized protein	XM_009156126.1	XP_009154374	XP_009154374.1	XP_009154374.1	XP_009154374.1	hypothetical protein	hypothetical protein
XP_009154375.1	5970.XP_009154375.1	https://smart.embl.de/smart/DDvec.cgi?smart=511:Pfam_F-box-like(9|53)+	Uncharacterized protein	20306733	20306733	684160995	GI:684160995	GeneID:20306733	GeneID:20306733	H6BR54	H6BR54_EXODN	HMPREF1120_02094	HMPREF1120_02094	Hypothetical protein	Uncharacterized protein	XM_009156127.1	XP_009154375	XP_009154375.1	XP_009154375.1	XP_009154375.1	hypothetical protein	hypothetical protein
XP_009154384.1	5970.XP_009154384.1	https://smart.embl.de/smart/DDvec.cgi?smart=475:Pfam_WLM(11|200)+COIL(216|243)+ZnF_RBZ(367|391)+	Uncharacterized protein	20306742	20306742	684161013	GI:684161013	GeneID:20306742	GeneID:20306742	H6BR64	H6BR64_EXODN	HMPREF1120_02103	HMPREF1120_02103	Hypothetical protein	Uncharacterized protein	XM_009156136.1	XP_009154384	XP_009154384.1	XP_009154384.1	XP_009154384.1	hypothetical protein	hypothetical protein
XP_009154385.1	5970.XP_009154385.1	https://smart.embl.de/smart/DDvec.cgi?smart=505:Pfam_MFS_1(49|460)+	Retrograde regulation protein 2	20306743	20306743	684161015	GI:684161015	GeneID:20306743	GeneID:20306743	H6BR63	H6BR63_EXODN	HMPREF1120_02104	HMPREF1120_02104	Retrograde regulation protein 2	Retrograde regulation protein 2	XM_009156137.1	XP_009154385	XP_009154385.1	XP_009154385.1	XP_009154385.1	retrograde regulation protein 2	retrograde regulation protein 2
XP_009154386.1	5970.XP_009154386.1	https://smart.embl.de/smart/DDvec.cgi?smart=532:TRANS(74|91)+Pfam_DUF1776(110|451)+	Uncharacterized protein	20306744	20306744	684161017	GI:684161017	GeneID:20306744	GeneID:20306744	H6BR65	H6BR65_EXODN	HMPREF1120_02105	HMPREF1120_02105	Hypothetical protein	Uncharacterized protein	XM_009156138.1	XP_009154386	XP_009154386.1	XP_009154386.1	XP_009154386.1	hypothetical protein	hypothetical protein
XP_009154403.1	5970.XP_009154403.1	https://smart.embl.de/smart/DDvec.cgi?smart=1161:ZnF_C2H2(252|274)+ZnF_C2H2(278|302)+ZnF_C2H2(312|340)+ZnF_C2H2(767|791)+ZnF_C2H2(795|820)+ZnF_C2H2(826|850)+	Uncharacterized protein	20306761	20306761	684161051	GI:684161051	GeneID:20306761	GeneID:20306761	H6BR82	H6BR82_EXODN	HMPREF1120_02122	HMPREF1120_02122	Hypothetical protein	Uncharacterized protein	XM_009156155.1	XP_009154403	XP_009154403.1	XP_009154403.1	XP_009154403.1	hypothetical protein	hypothetical protein
XP_009154405.1	5970.XP_009154405.1	https://smart.embl.de/smart/DDvec.cgi?smart=1051:COIL(419|447)+COIL(469|513)+COIL(537|660)+COIL(684|745)+	Uncharacterized protein	20306763	20306763	684161055	GI:684161055	GeneID:20306763	GeneID:20306763	H6BR84	H6BR84_EXODN	HMPREF1120_02124	HMPREF1120_02124	Hypothetical protein	Uncharacterized protein	XM_009156157.1	XP_009154405	XP_009154405.1	XP_009154405.1	XP_009154405.1	hypothetical protein	hypothetical protein
XP_009154409.1	5970.XP_009154409.1	https://smart.embl.de/smart/DDvec.cgi?smart=332:Pfam_NmrA(6|104)+	Cinnamyl-alcohol dehydrogenase	20306766	20306766	684161063	Cinnamyl-alcohol dehydrogenase	Cinnamyl-alcohol dehydrogenase	GI:684161063	GeneID:20306766	GeneID:20306766	H6BR88	H6BR88_EXODN	HMPREF1120_02127	HMPREF1120_02127	XM_009156161.1	XP_009154409	XP_009154409.1	XP_009154409.1	XP_009154409.1	cinnamyl-alcohol dehydrogenase	cinnamyl-alcohol dehydrogenase
XP_009154410.1	5970.XP_009154410.1	https://smart.embl.de/smart/DDvec.cgi?smart=154:Pfam_DUF3807(9|145)+	Uncharacterized protein	20306767	20306767	684161065	GI:684161065	GeneID:20306767	GeneID:20306767	H6BR89	H6BR89_EXODN	HMPREF1120_02128	HMPREF1120_02128	Hypothetical protein	Uncharacterized protein	XM_009156162.1	XP_009154410	XP_009154410.1	XP_009154410.1	XP_009154410.1	hypothetical protein	hypothetical protein
XP_009154411.1	5970.XP_009154411.1	http://smart.embl.de/smart/DDt.cgi?smart=108:	Uncharacterized protein	20306768	20306768	684161067	GI:684161067	GeneID:20306768	GeneID:20306768	H6BR90	H6BR90_EXODN	HMPREF1120_02129	HMPREF1120_02129	Hypothetical protein	Uncharacterized protein	XM_009156163.1	XP_009154411	XP_009154411.1	XP_009154411.1	XP_009154411.1	hypothetical protein	hypothetical protein
XP_009154415.1	5970.XP_009154415.1	https://smart.embl.de/smart/DDvec.cgi?smart=358:Pfam_PALP(26|344)+	1-aminocyclopropane-1-carboxylate deaminase	1-aminocyclopropane-1-carboxylate deaminase	1-aminocyclopropane-1-carboxylate deaminase	1-aminocyclopropane-1-carboxylate deaminase	20306772	20306772	684161075	GI:684161075	GeneID:20306772	GeneID:20306772	H6BR94	H6BR94_EXODN	HMPREF1120_02133	HMPREF1120_02133	XM_009156167.1	XP_009154415	XP_009154415.1	XP_009154415.1	XP_009154415.1
XP_009154444.1	5970.XP_009154444.1	https://smart.embl.de/smart/DDvec.cgi?smart=815:Pfam_Cofilin_ADF(34|154)+SH3(675|731)+SH3(760|815)+	Uncharacterized protein	20306799	20306799	684161133	GI:684161133	GeneID:20306799	GeneID:20306799	H6BRH8	H6BRH8_EXODN	HMPREF1120_02160	HMPREF1120_02160	Hypothetical protein	Uncharacterized protein	XM_009156196.1	XP_009154444	XP_009154444.1	XP_009154444.1	XP_009154444.1	hypothetical protein	hypothetical protein
XP_009154445.1	5970.XP_009154445.1	https://smart.embl.de/smart/DDvec.cgi?smart=1336:FBOX(85|125)+ZnF_C2H2(589|614)+	Uncharacterized protein	20306800	20306800	684161135	GI:684161135	GeneID:20306800	GeneID:20306800	H6BRH9	H6BRH9_EXODN	HMPREF1120_02161	HMPREF1120_02161	Hypothetical protein	Uncharacterized protein	XM_009156197.1	XP_009154445	XP_009154445.1	XP_009154445.1	XP_009154445.1	hypothetical protein	hypothetical protein
XP_009154462.1	5970.XP_009154462.1	https://smart.embl.de/smart/DDvec.cgi?smart=368:Pfam_PI31_Prot_N(31|185)+Pfam_PI31_Prot_C(271|332)+	Uncharacterized protein	20306817	20306817	684161169	GI:684161169	GeneID:20306817	GeneID:20306817	H6BRJ6	H6BRJ6_EXODN	HMPREF1120_02178	HMPREF1120_02178	Hypothetical protein	Uncharacterized protein	XM_009156214.1	XP_009154462	XP_009154462.1	XP_009154462.1	XP_009154462.1	hypothetical protein	hypothetical protein
XP_009154470.1	5970.XP_009154470.1	https://smart.embl.de/smart/DDvec.cgi?smart=542:RING(87|129)+	Uncharacterized protein	20306825	20306825	684161185	GI:684161185	GeneID:20306825	GeneID:20306825	H6BRQ7	H6BRQ7_EXODN	HMPREF1120_02186	HMPREF1120_02186	Hypothetical protein	Uncharacterized protein	XM_009156222.1	XP_009154470	XP_009154470.1	XP_009154470.1	XP_009154470.1	hypothetical protein	hypothetical protein
XP_009154482.1	5970.XP_009154482.1	https://smart.embl.de/smart/DDvec.cgi?smart=595:Pfam_Hexokinase_1(23|263)+Pfam_Hexokinase_2(274|585)+	Phosphotransferase; Hexokinase XprF; Belongs to the hexokinase family	20306837	20306837	684161209	GI:684161209	GeneID:20306837	GeneID:20306837	H6BRR9	H6BRR9_EXODN	HMPREF1120_02198	HMPREF1120_02198	Hexokinase XprF	Phosphotransferase	XM_009156234.1	XP_009154482	XP_009154482.1	XP_009154482.1	XP_009154482.1	hexokinase XprF	hexokinase XprF
XP_009154500.1	5970.XP_009154500.1	https://smart.embl.de/smart/DDvec.cgi?smart=404:Pfam_Acetyltransf_7(108|188)+	Uncharacterized protein	20306855	20306855	684161245	GI:684161245	GeneID:20306855	GeneID:20306855	H6BRT7	H6BRT7_EXODN	HMPREF1120_02216	HMPREF1120_02216	Hypothetical protein	Uncharacterized protein	XM_009156252.1	XP_009154500	XP_009154500.1	XP_009154500.1	XP_009154500.1	hypothetical protein	hypothetical protein
XP_009154501.1	5970.XP_009154501.1	https://smart.embl.de/smart/DDvec.cgi?smart=817:COIL(250|283)+RING(297|393)+RING(460|489)+	Uncharacterized protein	20306856	20306856	684161247	GI:684161247	GeneID:20306856	GeneID:20306856	H6BRT8	H6BRT8_EXODN	HMPREF1120_02217	HMPREF1120_02217	Hypothetical protein	Uncharacterized protein	XM_009156253.1	XP_009154501	XP_009154501.1	XP_009154501.1	XP_009154501.1	hypothetical protein	hypothetical protein
XP_009154508.1	5970.XP_009154508.1	https://smart.embl.de/smart/DDvec.cgi?smart=418:TRANS(95|117)+TRANS(195|217)+TRANS(236|258)+TRANS(273|295)+	Uncharacterized protein	20306863	20306863	684161261	GI:684161261	GeneID:20306863	GeneID:20306863	H6BRU5	H6BRU5_EXODN	HMPREF1120_02224	HMPREF1120_02224	Hypothetical protein	Uncharacterized protein	XM_009156260.1	XP_009154508	XP_009154508.1	XP_009154508.1	XP_009154508.1	hypothetical protein	hypothetical protein
XP_009154509.1	5970.XP_009154509.1	https://smart.embl.de/smart/DDvec.cgi?smart=1156:CDT1(89|287)+DEXDc(366|574)+HELICc(632|713)+Pfam_DUF1998(977|1066)+	Uncharacterized protein	20306864	20306864	684161263	GI:684161263	GeneID:20306864	GeneID:20306864	H6BRU6	H6BRU6_EXODN	HMPREF1120_02225	HMPREF1120_02225	Hypothetical protein	Uncharacterized protein	XM_009156261.1	XP_009154509	XP_009154509.1	XP_009154509.1	XP_009154509.1	hypothetical protein	hypothetical protein
XP_009154510.1	5970.XP_009154510.1	https://smart.embl.de/smart/DDvec.cgi?smart=385:SIGNAL(1|20)+	Endo-1,3(4)-beta-glucanase	20306865	20306865	684161265	Endo-1,3(4)-beta-glucanase	Endo-1,3(4)-beta-glucanase	GI:684161265	GeneID:20306865	GeneID:20306865	H6BRU7	H6BRU7_EXODN	HMPREF1120_02226	HMPREF1120_02226	XM_009156262.1	XP_009154510	XP_009154510.1	XP_009154510.1	XP_009154510.1	endo-1,3(4)-beta-glucanase	endo-1,3(4)-beta-glucanase
XP_009154511.1	5970.XP_009154511.1	http://smart.embl.de/smart/DDt.cgi?smart=420:	Uncharacterized protein	20306866	20306866	684161267	GI:684161267	GeneID:20306866	GeneID:20306866	H6BRU8	H6BRU8_EXODN	HMPREF1120_02227	HMPREF1120_02227	Hypothetical protein	Uncharacterized protein	XM_009156263.1	XP_009154511	XP_009154511.1	XP_009154511.1	XP_009154511.1	hypothetical protein	hypothetical protein
XP_009154512.1	5970.XP_009154512.1	https://smart.embl.de/smart/DDvec.cgi?smart=505:Pfam_ORC6(11|231)+	Uncharacterized protein	20306867	20306867	684161269	GI:684161269	GeneID:20306867	GeneID:20306867	H6BRU9	H6BRU9_EXODN	HMPREF1120_02228	HMPREF1120_02228	Hypothetical protein	Uncharacterized protein	XM_009156264.1	XP_009154512	XP_009154512.1	XP_009154512.1	XP_009154512.1	hypothetical protein	hypothetical protein
XP_009154514.1	5970.XP_009154514.1	https://smart.embl.de/smart/DDvec.cgi?smart=891:GAL4(20|68)+	Uncharacterized protein	20306869	20306869	684161273	GI:684161273	GeneID:20306869	GeneID:20306869	H6BRV1	H6BRV1_EXODN	HMPREF1120_02230	HMPREF1120_02230	Hypothetical protein	Uncharacterized protein	XM_009156266.1	XP_009154514	XP_009154514.1	XP_009154514.1	XP_009154514.1	hypothetical protein	hypothetical protein
XP_009154515.1	5970.XP_009154515.1	http://smart.embl.de/smart/DDt.cgi?smart=477:	Uncharacterized protein	20306870	20306870	684161275	GI:684161275	GeneID:20306870	GeneID:20306870	H6BRV2	H6BRV2_EXODN	HMPREF1120_02231	HMPREF1120_02231	Hypothetical protein	Uncharacterized protein	XM_009156267.1	XP_009154515	XP_009154515.1	XP_009154515.1	XP_009154515.1	hypothetical protein	hypothetical protein
XP_009154518.1	5970.XP_009154518.1	https://smart.embl.de/smart/DDvec.cgi?smart=211:TRANS(98|120)+TRANS(135|157)+	Uncharacterized protein	20306873	20306873	684161281	GI:684161281	GeneID:20306873	GeneID:20306873	H6BRV5	H6BRV5_EXODN	HMPREF1120_02234	HMPREF1120_02234	Hypothetical protein	Uncharacterized protein	XM_009156270.1	XP_009154518	XP_009154518.1	XP_009154518.1	XP_009154518.1	hypothetical protein	hypothetical protein
XP_009154519.1	5970.XP_009154519.1	https://smart.embl.de/smart/DDvec.cgi?smart=384:TRANS(292|314)+	Uncharacterized protein	20306874	20306874	684161283	GI:684161283	GeneID:20306874	GeneID:20306874	H6BS03	H6BS03_EXODN	HMPREF1120_02235	HMPREF1120_02235	Hypothetical protein	Uncharacterized protein	XM_009156271.1	XP_009154519	XP_009154519.1	XP_009154519.1	XP_009154519.1	hypothetical protein	hypothetical protein
XP_009154523.1	5970.XP_009154523.1	https://smart.embl.de/smart/DDvec.cgi?smart=107:Pfam_GFA(13|98)+	Uncharacterized protein	20306878	20306878	684161291	GI:684161291	GeneID:20306878	GeneID:20306878	H6BS07	H6BS07_EXODN	HMPREF1120_02239	HMPREF1120_02239	Hypothetical protein	Uncharacterized protein	XM_009156275.1	XP_009154523	XP_009154523.1	XP_009154523.1	XP_009154523.1	hypothetical protein	hypothetical protein
XP_009154528.1	5970.XP_009154528.1	https://smart.embl.de/smart/DDvec.cgi?smart=554:PP2C_SIG(194|537)+	Uncharacterized protein	20306883	20306883	684161301	GI:684161301	GeneID:20306883	GeneID:20306883	H6BS12	H6BS12_EXODN	HMPREF1120_02244	HMPREF1120_02244	Hypothetical protein	Uncharacterized protein	XM_009156280.1	XP_009154528	XP_009154528.1	XP_009154528.1	XP_009154528.1	hypothetical protein	hypothetical protein
XP_009154537.1	5970.XP_009154537.1	https://smart.embl.de/smart/DDvec.cgi?smart=939:PI3K_C2(18|133)+PI3Ka(372|563)+PI3Kc(677|936)+	Phosphatidylinositol 3-kinase; Belongs to the PI3/PI4-kinase family	20306892	20306892	684161319	GI:684161319	GeneID:20306892	GeneID:20306892	H6BS21	H6BS21_EXODN	HMPREF1120_02253	HMPREF1120_02253	Phosphatidylinositol 3-kinase	Phosphatidylinositol 3-kinase	XM_009156289.1	XP_009154537	XP_009154537.1	XP_009154537.1	XP_009154537.1	phosphatidylinositol 3-kinase	phosphatidylinositol 3-kinase
XP_009154540.1	5970.XP_009154540.1	https://smart.embl.de/smart/DDvec.cgi?smart=343:CTNS(29|60)+TRANS(90|112)+TRANS(171|193)+CTNS(215|246)+	Uncharacterized protein	20306895	20306895	684161325	GI:684161325	GeneID:20306895	GeneID:20306895	H6BS24	H6BS24_EXODN	HMPREF1120_02256	HMPREF1120_02256	Hypothetical protein	Uncharacterized protein	XM_009156292.1	XP_009154540	XP_009154540.1	XP_009154540.1	XP_009154540.1	hypothetical protein	hypothetical protein
XP_009154563.1	5970.XP_009154563.1	https://smart.embl.de/smart/DDvec.cgi?smart=995:COIL(632|674)+Pfam_Acetyltransf_1(749|842)+	Uncharacterized protein	20306917	20306917	684161371	GI:684161371	GeneID:20306917	GeneID:20306917	H6BS47	H6BS47_EXODN	HMPREF1120_02278	HMPREF1120_02278	Hypothetical protein	Uncharacterized protein	XM_009156315.1	XP_009154563	XP_009154563.1	XP_009154563.1	XP_009154563.1	hypothetical protein	hypothetical protein
XP_009154568.1	5970.XP_009154568.1	http://smart.embl.de/smart/DDt.cgi?smart=150:	Uncharacterized protein	20306922	20306922	684161381	GI:684161381	GeneID:20306922	GeneID:20306922	H6BS52	H6BS52_EXODN	HMPREF1120_02283	HMPREF1120_02283	Hypothetical protein	Uncharacterized protein	XM_009156320.1	XP_009154568	XP_009154568.1	XP_009154568.1	XP_009154568.1	hypothetical protein	hypothetical protein
XP_009154569.1	5970.XP_009154569.1	https://smart.embl.de/smart/DDvec.cgi?smart=304:Pfam_PRK(25|245)+	L-iditol 2-dehydrogenase	20306923	20306923	684161383	GI:684161383	GeneID:20306923	GeneID:20306923	H6BS53	H6BS53_EXODN	HMPREF1120_02284	HMPREF1120_02284	L-iditol 2-dehydrogenase	L-iditol 2-dehydrogenase	L-iditol 2-dehydrogenase	XM_009156321.1	XP_009154569	XP_009154569.1	XP_009154569.1	XP_009154569.1
XP_009154570.1	5970.XP_009154570.1	https://smart.embl.de/smart/DDvec.cgi?smart=266:Pfam_DUF4336(29|196)+	Uncharacterized protein	20306924	20306924	684161385	GI:684161385	GeneID:20306924	GeneID:20306924	H6BS54	H6BS54_EXODN	HMPREF1120_02285	HMPREF1120_02285	Hypothetical protein	Uncharacterized protein	XM_009156322.1	XP_009154570	XP_009154570.1	XP_009154570.1	XP_009154570.1	hypothetical protein	hypothetical protein
XP_009154571.1	5970.XP_009154571.1	https://smart.embl.de/smart/DDvec.cgi?smart=186:TRANS(80|102)+TRANS(146|168)+	Uncharacterized protein	20306925	20306925	684161387	GI:684161387	GeneID:20306925	GeneID:20306925	H6BS55	H6BS55_EXODN	HMPREF1120_02286	HMPREF1120_02286	Hypothetical protein	Uncharacterized protein	XM_009156323.1	XP_009154571	XP_009154571.1	XP_009154571.1	XP_009154571.1	hypothetical protein	hypothetical protein
XP_009154575.1	5970.XP_009154575.1	https://smart.embl.de/smart/DDvec.cgi?smart=520:TRANS(7|29)+Pfam_DUF3445(185|422)+	Alpha-1,2-mannosyltransferase	20306929	20306929	684161395	Alpha-1,2-mannosyltransferase	Alpha-1,2-mannosyltransferase	GI:684161395	GeneID:20306929	GeneID:20306929	H6BS59	H6BS59_EXODN	HMPREF1120_02290	HMPREF1120_02290	XM_009156327.1	XP_009154575	XP_009154575.1	XP_009154575.1	XP_009154575.1	alpha-1,2-mannosyltransferase	alpha-1,2-mannosyltransferase
XP_009154589.1	5970.XP_009154589.1	https://smart.embl.de/smart/DDvec.cgi?smart=351:TRANS(240|262)+	Uncharacterized protein	20306943	20306943	684161423	GI:684161423	GeneID:20306943	GeneID:20306943	H6BS73	H6BS73_EXODN	HMPREF1120_02304	HMPREF1120_02304	Hypothetical protein	Uncharacterized protein	XM_009156341.1	XP_009154589	XP_009154589.1	XP_009154589.1	XP_009154589.1	hypothetical protein	hypothetical protein
XP_009154590.1	5970.XP_009154590.1	https://smart.embl.de/smart/DDvec.cgi?smart=523:TRANS(7|29)+Pfam_p450(45|490)+	Cytochrome P450 oxidoreductase	20306944	20306944	684161425	Cytochrome P450 oxidoreductase	Cytochrome P450 oxidoreductase	GI:684161425	GeneID:20306944	GeneID:20306944	H6BS74	H6BS74_EXODN	HMPREF1120_02305	HMPREF1120_02305	XM_009156342.1	XP_009154590	XP_009154590.1	XP_009154590.1	XP_009154590.1	cytochrome P450 oxidoreductase	cytochrome P450 oxidoreductase
XP_009154591.1	5970.XP_009154591.1	https://smart.embl.de/smart/DDvec.cgi?smart=379:SIGNAL(1|27)+Pfam_PBP(43|199)+	Uncharacterized protein	20306945	20306945	684161427	GI:684161427	GeneID:20306945	GeneID:20306945	H6BS75	H6BS75_EXODN	HMPREF1120_02306	HMPREF1120_02306	Hypothetical protein	Uncharacterized protein	XM_009156344.1	XP_009154591	XP_009154591.1	XP_009154591.1	XP_009154591.1	XP_009154592.1	hypothetical protein	hypothetical protein
XP_009154603.1	5970.XP_009154603.1	https://smart.embl.de/smart/DDvec.cgi?smart=315:Pfam_QRPTase_N(47|137)+Pfam_QRPTase_C(139|312)+	Nicotinate-nucleotide pyrophosphorylase [carboxylating]; Involved in the catabolism of quinolinic acid (QA); Belongs to the NadC/ModD family	20306956	20306956	684161451	GI:684161451	GeneID:20306956	GeneID:20306956	H6BS87	H6BS87_EXODN	HMPREF1120_02317	HMPREF1120_02317	XM_009156355.1	XP_009154603	XP_009154603.1	XP_009154603.1	XP_009154603.1
XP_009154606.1	5970.XP_009154606.1	https://smart.embl.de/smart/DDvec.cgi?smart=1225:Pfam_RNA_pol_Rpb2_2(258|441)+Pfam_RNA_pol_Rpb2_3(519|583)+Pfam_RNA_pol_Rpb2_4(620|681)+Pfam_RNA_pol_Rpb2_5(702|742)+Pfam_RNA_pol_Rpb2_6(749|1122)+Pfam_RNA_pol_Rpb2_7(1124|1214)+	DNA-directed RNA polymerase subunit beta; DNA-dependent RNA polymerase catalyzes the transcription of DNA into RNA using the four ribonucleoside triphosphates as substrates	20306959	20306959	684161457	DNA-directed RNA polymerase III subunit C2	DNA-directed RNA polymerase III subunit C2	DNA-directed RNA polymerase subunit beta	GI:684161457	GeneID:20306959	GeneID:20306959	H6BS90	H6BS90_EXODN	HMPREF1120_02320	HMPREF1120_02320	XM_009156358.1	XP_009154606	XP_009154606.1	XP_009154606.1	XP_009154606.1
XP_009154609.1	5970.XP_009154609.1	http://smart.embl.de/smart/DDt.cgi?smart=599:	Uncharacterized protein	20306962	20306962	684161463	GI:684161463	GeneID:20306962	GeneID:20306962	H6BS93	H6BS93_EXODN	HMPREF1120_02323	HMPREF1120_02323	Hypothetical protein	Uncharacterized protein	XM_009156361.1	XP_009154609	XP_009154609.1	XP_009154609.1	XP_009154609.1	hypothetical protein	hypothetical protein
XP_009154611.1	5970.XP_009154611.1	https://smart.embl.de/smart/DDvec.cgi?smart=620:LisH(67|99)+WD40(284|323)+WD40(326|365)+WD40(368|413)+WD40(419|457)+WD40(501|543)+WD40(546|592)+	Uncharacterized protein	20306964	20306964	684161467	GI:684161467	GeneID:20306964	GeneID:20306964	H6BS95	H6BS95_EXODN	HMPREF1120_02325	HMPREF1120_02325	Hypothetical protein	Uncharacterized protein	XM_009156363.1	XP_009154611	XP_009154611.1	XP_009154611.1	XP_009154611.1	hypothetical protein	hypothetical protein
XP_009154621.1	5970.XP_009154621.1	https://smart.embl.de/smart/DDvec.cgi?smart=616:Pfam_Sugar_tr(117|568)+	MFS transporter, SP family, major inositol transporter; Belongs to the major facilitator superfamily. Sugar transporter (TC 2.A.1.1) family	20306974	20306974	684161487	GI:684161487	GeneID:20306974	GeneID:20306974	H6BSA5	H6BSA5_EXODN	HMPREF1120_02335	HMPREF1120_02335	XM_009156373.1	XP_009154621	XP_009154621.1	XP_009154621.1	XP_009154621.1
XP_009154628.1	5970.XP_009154628.1	https://smart.embl.de/smart/DDvec.cgi?smart=408:AAA(78|220)+Pfam_Rep_fac_C(300|387)+	Replication factor C subunit 3/5	20306981	20306981	684161501	GI:684161501	GeneID:20306981	GeneID:20306981	H6BSF9	H6BSF9_EXODN	HMPREF1120_02342	HMPREF1120_02342	Replication factor C subunit 3/5	Replication factor C subunit 3/5	XM_009156380.1	XP_009154628	XP_009154628.1	XP_009154628.1	XP_009154628.1	replication factor C subunit 3/5	replication factor C subunit 3/5
XP_009154629.1	5970.XP_009154629.1	https://smart.embl.de/smart/DDvec.cgi?smart=679:S_TKc(270|558)+COIL(579|616)+	Cdc2-like kinase, arginine/serine-rich	20306982	20306982	684161503	Cdc2-like kinase, arginine/serine-rich	Cdc2-like kinase, arginine/serine-rich	Cdc2-like kinase, arginine/serine-rich	GI:684161503	GeneID:20306982	GeneID:20306982	H6BSG0	H6BSG0_EXODN	HMPREF1120_02343	HMPREF1120_02343	XM_009156381.1	XP_009154629	XP_009154629.1	XP_009154629.1	XP_009154629.1
XP_009154635.1	5970.XP_009154635.1	https://smart.embl.de/smart/DDvec.cgi?smart=247:Pfam_GGACT(6|179)+	Uncharacterized protein	20306988	20306988	684161515	GI:684161515	GeneID:20306988	GeneID:20306988	H6BSG6	H6BSG6_EXODN	HMPREF1120_02349	HMPREF1120_02349	Hypothetical protein	Uncharacterized protein	XM_009156387.1	XP_009154635	XP_009154635.1	XP_009154635.1	XP_009154635.1	hypothetical protein	hypothetical protein
XP_009154636.1	5970.XP_009154636.1	https://smart.embl.de/smart/DDvec.cgi?smart=290:COIL(170|197)+TRANS(266|288)+	Uncharacterized protein	20306989	20306989	684161517	GI:684161517	GeneID:20306989	GeneID:20306989	H6BSG7	H6BSG7_EXODN	HMPREF1120_02350	HMPREF1120_02350	Hypothetical protein	Uncharacterized protein	XM_009156388.1	XP_009154636	XP_009154636.1	XP_009154636.1	XP_009154636.1	hypothetical protein	hypothetical protein
XP_009154637.1	5970.XP_009154637.1	https://smart.embl.de/smart/DDvec.cgi?smart=3162:COIL(1695|1728)+COIL(1854|1883)+Pfam_DUF3638(2016|2236)+Pfam_DUF3645(2353|2385)+	Uncharacterized protein	20306990	20306990	684161519	GI:684161519	GeneID:20306990	GeneID:20306990	H6BSG8	H6BSG8_EXODN	HMPREF1120_02351	HMPREF1120_02351	Hypothetical protein	Uncharacterized protein	XM_009156389.1	XP_009154637	XP_009154637.1	XP_009154637.1	XP_009154637.1	hypothetical protein	hypothetical protein
XP_009154647.1	5970.XP_009154647.1	https://smart.embl.de/smart/DDvec.cgi?smart=601:GAL4(4|48)+Pfam_Fungal_trans_2(216|347)+	Uncharacterized protein	20307000	20307000	684161539	GI:684161539	GeneID:20307000	GeneID:20307000	H6BSH9	H6BSH9_EXODN	HMPREF1120_02361	HMPREF1120_02361	Hypothetical protein	Uncharacterized protein	XM_009156399.1	XP_009154647	XP_009154647.1	XP_009154647.1	XP_009154647.1	hypothetical protein	hypothetical protein
XP_009154651.1	5970.XP_009154651.1	https://smart.embl.de/smart/DDvec.cgi?smart=1413:Pfam_XRN_N(1|227)+	5'-3' exoribonuclease 1; Multifunctional protein that exhibits several independent functions at different levels of the cellular processes. 5'-3' exonuclease component of the nonsense-mediated mRNA decay (NMD) which is a highly conserved mRNA degradation pathway, an RNA surveillance system whose role is to identify and rid cells of mRNA with premature termination codons and thus prevents accumula…	20307002	20307003	20307003	225201	238121	256943	5'-3' exoribonuclease 1	684161545	684161547	858893	CDD:225201	CDD:238121	CDD:256943	GI:684161545	GI:684161547	GeneID:20307002	GeneID:20307003	GeneID:20307003	H6BSI2	H6BSI2_EXODN	HMPREF1120_02364	HMPREF1120_02364	Phosphodiesterase/alkaline phosphatase D	XM_009156403.1	XP_009154651	XP_009154651.1	XP_009154651.1	XP_009154651.1	phosphodiesterase/alkaline phosphatase D	phosphodiesterase/alkaline phosphatase D	taxon:858893
XP_009154652.1	5970.XP_009154652.1	https://smart.embl.de/smart/DDvec.cgi?smart=488:Pfam_ACT_7(121|183)+	Uncharacterized protein	20307004	20307004	684161549	GI:684161549	GeneID:20307004	GeneID:20307004	H6BSI3	H6BSI3_EXODN	HMPREF1120_02365	HMPREF1120_02365	Hypothetical protein	Uncharacterized protein	XM_009156404.1	XP_009154652	XP_009154652.1	XP_009154652.1	XP_009154652.1	hypothetical protein	hypothetical protein
XP_009154662.1	5970.XP_009154662.1	https://smart.embl.de/smart/DDvec.cgi?smart=894:GAL4(32|79)+Fungal_trans(332|405)+	Uncharacterized protein	20307013	20307013	684161569	GI:684161569	GeneID:20307013	GeneID:20307013	H6BSJ3	H6BSJ3_EXODN	HMPREF1120_02374	HMPREF1120_02374	Hypothetical protein	Uncharacterized protein	XM_009156414.1	XP_009154662	XP_009154662.1	XP_009154662.1	XP_009154662.1	hypothetical protein	hypothetical protein
XP_009154663.1	5970.XP_009154663.1	https://smart.embl.de/smart/DDvec.cgi?smart=575:Pfam_Sugar_tr(72|255)+TRANS(537|559)+	DNA repair protein RAD50	20307014	20307014	684161571	DNA repair protein RAD50	DNA repair protein RAD50	DNA repair protein RAD50	GI:684161571	GeneID:20307014	GeneID:20307014	H6BSJ4	H6BSJ4_EXODN	HMPREF1120_02375	HMPREF1120_02375	XM_009156415.1	XP_009154663	XP_009154663.1	XP_009154663.1	XP_009154663.1
XP_009154668.1	5970.XP_009154668.1	https://smart.embl.de/smart/DDvec.cgi?smart=726:AAA(363|515)+	DNA helicase; Minichromosome maintenance protein 5 (cell division control protein 46); Belongs to the MCM family	20307017	20307018	20307018	684161579	684161581	858893	DNA helicase	GI:684161579	GI:684161581	GeneID:20307017	GeneID:20307018	GeneID:20307018	H6BSJ9	H6BSJ9_EXODN	HMPREF1120_02379	HMPREF1120_02379	XM_009156420.1	XP_009154668	XP_009154668.1	XP_009154668.1	XP_009154668.1	taxon:858893
XP_009154680.1	5970.XP_009154680.1	https://smart.embl.de/smart/DDvec.cgi?smart=283:Pfam_Caleosin(85|253)+	Uncharacterized protein	20307030	20307030	684161605	GI:684161605	GeneID:20307030	GeneID:20307030	H6BSL1	H6BSL1_EXODN	HMPREF1120_02391	HMPREF1120_02391	Hypothetical protein	Uncharacterized protein	XM_009156432.1	XP_009154680	XP_009154680.1	XP_009154680.1	XP_009154680.1	hypothetical protein	hypothetical protein
XP_009154681.1	5970.XP_009154681.1	https://smart.embl.de/smart/DDvec.cgi?smart=306:Pfam_UBA(3|36)+COIL(106|207)+UBX(227|306)+	Uncharacterized protein	20307031	20307031	684161607	GI:684161607	GeneID:20307031	GeneID:20307031	H6BSR6	H6BSR6_EXODN	HMPREF1120_02392	HMPREF1120_02392	Hypothetical protein	Uncharacterized protein	XM_009156433.1	XP_009154681	XP_009154681.1	XP_009154681.1	XP_009154681.1	hypothetical protein	hypothetical protein
XP_009154686.1	5970.XP_009154686.1	https://smart.embl.de/smart/DDvec.cgi?smart=513:Pfam_PAF-AH_p_II(46|458)+	Putative phospholipase; 1-alkyl-2-acetylglycerophosphocholine esterase	1-alkyl-2-acetylglycerophosphocholine esterase	1-alkyl-2-acetylglycerophosphocholine esterase	20307036	20307036	684161617	GI:684161617	GeneID:20307036	GeneID:20307036	H6BSS1	H6BSS1_EXODN	HMPREF1120_02397	HMPREF1120_02397	Putative phospholipase	XM_009156438.1	XP_009154686	XP_009154686.1	XP_009154686.1	XP_009154686.1
XP_009154710.1	5970.XP_009154710.1	https://smart.embl.de/smart/DDvec.cgi?smart=1203:DEXDc(590|787)+HELICc(987|1071)+	Adenosinetriphosphatase	20307059	20307059	684161665	Adenosinetriphosphatase	Adenosinetriphosphatase	GI:684161665	GeneID:20307059	GeneID:20307059	H6BSU5	H6BSU5_EXODN	HMPREF1120_02420	HMPREF1120_02420	XM_009156462.1	XP_009154710	XP_009154710.1	XP_009154710.1	XP_009154710.1	adenosinetriphosphatase	adenosinetriphosphatase
XP_009154720.1	5970.XP_009154720.1	https://smart.embl.de/smart/DDvec.cgi?smart=408:AAA(65|203)+Pfam_Rep_fac_C(312|401)+	Replication factor C subunit 2/4	20307069	20307069	684161685	GI:684161685	GeneID:20307069	GeneID:20307069	H6BSV5	H6BSV5_EXODN	HMPREF1120_02430	HMPREF1120_02430	Replication factor C subunit 2/4	Replication factor C subunit 2/4	XM_009156472.1	XP_009154720	XP_009154720.1	XP_009154720.1	XP_009154720.1	replication factor C subunit 2/4	replication factor C subunit 2/4
XP_009154721.1	5970.XP_009154721.1	http://smart.embl.de/smart/DDt.cgi?smart=459:	Uncharacterized protein	20307070	20307070	684161687	GI:684161687	GeneID:20307070	GeneID:20307070	H6BSV6	H6BSV6_EXODN	HMPREF1120_02431	HMPREF1120_02431	Hypothetical protein	Uncharacterized protein	XM_009156473.1	XP_009154721	XP_009154721.1	XP_009154721.1	XP_009154721.1	hypothetical protein	hypothetical protein
XP_009154730.1	5970.XP_009154730.1	https://smart.embl.de/smart/DDvec.cgi?smart=1000:Pfam_UCH_1(215|512)+	Uncharacterized protein; Belongs to the peptidase C19 family	20307079	20307079	684161705	GI:684161705	GeneID:20307079	GeneID:20307079	H6BSW6	H6BSW6_EXODN	HMPREF1120_02440	HMPREF1120_02440	Hypothetical protein	Uncharacterized protein	XM_009156483.1	XP_009154730	XP_009154730.1	XP_009154730.1	XP_009154730.1	XP_009154731.1	hypothetical protein	hypothetical protein
XP_009154744.1	5970.XP_009154744.1	https://smart.embl.de/smart/DDvec.cgi?smart=594:Pfam_DUF382(169|295)+PSP(300|353)+COIL(405|430)+	Uncharacterized protein	20307092	20307092	684161733	GI:684161733	GeneID:20307092	GeneID:20307092	H6BT33	H6BT33_EXODN	HMPREF1120_02453	HMPREF1120_02453	Hypothetical protein	Uncharacterized protein	XM_009156496.1	XP_009154744	XP_009154744.1	XP_009154744.1	XP_009154744.1	hypothetical protein	hypothetical protein
XP_009154745.1	5970.XP_009154745.1	https://smart.embl.de/smart/DDvec.cgi?smart=800:GAL4(107|152)+Fungal_trans(373|444)+	Uncharacterized protein	20307093	20307093	684161735	GI:684161735	GeneID:20307093	GeneID:20307093	H6BT34	H6BT34_EXODN	HMPREF1120_02454	HMPREF1120_02454	Hypothetical protein	Uncharacterized protein	XM_009156497.1	XP_009154745	XP_009154745.1	XP_009154745.1	XP_009154745.1	hypothetical protein	hypothetical protein
XP_009154747.1	5970.XP_009154747.1	https://smart.embl.de/smart/DDvec.cgi?smart=209:TRANS(33|55)+TRANS(60|82)+TRANS(103|125)+TRANS(135|157)+	Uncharacterized protein	20307095	20307095	684161739	GI:684161739	GeneID:20307095	GeneID:20307095	H6BT36	H6BT36_EXODN	HMPREF1120_02456	HMPREF1120_02456	Hypothetical protein	Uncharacterized protein	XM_009156499.1	XP_009154747	XP_009154747.1	XP_009154747.1	XP_009154747.1	hypothetical protein	hypothetical protein
XP_009154749.1	5970.XP_009154749.1	https://smart.embl.de/smart/DDvec.cgi?smart=714:Pfam_HSP70(255|559)+	Uncharacterized protein; Belongs to the heat shock protein 70 family	20307097	20307097	684161743	GI:684161743	GeneID:20307097	GeneID:20307097	H6BT38	H6BT38_EXODN	HMPREF1120_02458	HMPREF1120_02458	Hypothetical protein	Uncharacterized protein	XM_009156501.1	XP_009154749	XP_009154749.1	XP_009154749.1	XP_009154749.1	hypothetical protein	hypothetical protein
XP_009154754.1	5970.XP_009154754.1	http://smart.embl.de/smart/DDt.cgi?smart=470:	Uncharacterized protein	20307102	20307102	684161753	GI:684161753	GeneID:20307102	GeneID:20307102	H6BT43	H6BT43_EXODN	HMPREF1120_02463	HMPREF1120_02463	Hypothetical protein	Uncharacterized protein	XM_009156506.1	XP_009154754	XP_009154754.1	XP_009154754.1	XP_009154754.1	hypothetical protein	hypothetical protein
XP_009154761.1	5970.XP_009154761.1	https://smart.embl.de/smart/DDvec.cgi?smart=362:Pfam_XPA_C(209|259)+	DNA-repair protein complementing XP-A cells	20307109	20307109	684161767	DNA-repair protein complementing XP-A cells	DNA-repair protein complementing XP-A cells	DNA-repair protein complementing XP-A cells	GI:684161767	GeneID:20307109	GeneID:20307109	H6BT50	H6BT50_EXODN	HMPREF1120_02470	HMPREF1120_02470	XM_009156513.1	XP_009154761	XP_009154761.1	XP_009154761.1	XP_009154761.1
XP_009154767.1	5970.XP_009154767.1	https://smart.embl.de/smart/DDvec.cgi?smart=623:Pfam_Aminotran_1_2(103|413)+	Aromatic amino acid aminotransferase	20307115	20307115	684161779	Aromatic amino acid aminotransferase	Aromatic amino acid aminotransferase	GI:684161779	GeneID:20307115	GeneID:20307115	H6BT56	H6BT56_EXODN	HMPREF1120_02476	HMPREF1120_02476	XM_009156519.1	XP_009154767	XP_009154767.1	XP_009154767.1	XP_009154767.1	aromatic amino acid aminotransferase	aromatic amino acid aminotransferase
XP_009154783.1	5970.XP_009154783.1	http://smart.embl.de/smart/DDt.cgi?smart=565:	Uncharacterized protein	20307131	20307131	684161811	GI:684161811	GeneID:20307131	GeneID:20307131	H6BT72	H6BT72_EXODN	HMPREF1120_02492	HMPREF1120_02492	Hypothetical protein	Uncharacterized protein	XM_009156535.1	XP_009154783	XP_009154783.1	XP_009154783.1	XP_009154783.1	hypothetical protein	hypothetical protein
XP_009154784.1	5970.XP_009154784.1	https://smart.embl.de/smart/DDvec.cgi?smart=210:SIGNAL(1|21)+TRANS(144|166)+TRANS(186|208)+	Uncharacterized protein	20307132	20307132	684161813	GI:684161813	GeneID:20307132	GeneID:20307132	H6BT74	H6BT74_EXODN	HMPREF1120_02493	HMPREF1120_02493	Hypothetical protein	Uncharacterized protein	XM_009156536.1	XP_009154784	XP_009154784.1	XP_009154784.1	XP_009154784.1	hypothetical protein	hypothetical protein
XP_009154785.1	5970.XP_009154785.1	http://smart.embl.de/smart/DDt.cgi?smart=194:	Uncharacterized protein	20307133	20307133	684161815	GI:684161815	GeneID:20307133	GeneID:20307133	H6BT73	H6BT73_EXODN	HMPREF1120_02494	HMPREF1120_02494	Hypothetical protein	Uncharacterized protein	XM_009156537.1	XP_009154785	XP_009154785.1	XP_009154785.1	XP_009154785.1	hypothetical protein	hypothetical protein
XP_009154786.1	5970.XP_009154786.1	https://smart.embl.de/smart/DDvec.cgi?smart=688:Pfam_Usp(449|647)+	Uncharacterized protein	20307134	20307134	684161817	GI:684161817	GeneID:20307134	GeneID:20307134	H6BT75	H6BT75_EXODN	HMPREF1120_02495	HMPREF1120_02495	Hypothetical protein	Uncharacterized protein	XM_009156538.1	XP_009154786	XP_009154786.1	XP_009154786.1	XP_009154786.1	hypothetical protein	hypothetical protein
XP_009154798.1	5970.XP_009154798.1	https://smart.embl.de/smart/DDvec.cgi?smart=558:Pfam_NAD_binding_8(16|98)+	Cyclohexanone monooxygenase; Belongs to the FMO family	20307146	20307146	684161841	Cyclohexanone monooxygenase	Cyclohexanone monooxygenase	GI:684161841	GeneID:20307146	GeneID:20307146	H6BTE0	H6BTE0_EXODN	HMPREF1120_02507	HMPREF1120_02507	XM_009156550.1	XP_009154798	XP_009154798.1	XP_009154798.1	XP_009154798.1	cyclohexanone monooxygenase	cyclohexanone monooxygenase
XP_009154799.1	5970.XP_009154799.1	https://smart.embl.de/smart/DDvec.cgi?smart=560:Pfam_AA_permease(51|514)+	AAT family amino acid transporter	20307147	20307147	684161843	AAT family amino acid transporter	AAT family amino acid transporter	AAT family amino acid transporter	GI:684161843	GeneID:20307147	GeneID:20307147	H6BTE1	H6BTE1_EXODN	HMPREF1120_02508	HMPREF1120_02508	XM_009156551.1	XP_009154799	XP_009154799.1	XP_009154799.1	XP_009154799.1
XP_009154800.1	5970.XP_009154800.1	https://smart.embl.de/smart/DDvec.cgi?smart=245:Pfam_KR(9|180)+	Oxidoreductase, short chain dehydrogenase/reductase	20307148	20307148	684161845	GI:684161845	GeneID:20307148	GeneID:20307148	H6BTE2	H6BTE2_EXODN	HMPREF1120_02509	HMPREF1120_02509	XM_009156552.1	XP_009154800	XP_009154800.1	XP_009154800.1	XP_009154800.1
XP_009154801.1	5970.XP_009154801.1	https://smart.embl.de/smart/DDvec.cgi?smart=753:GAL4(19|63)+Pfam_Fungal_trans_2(282|743)+	Arginine metabolism regulation protein II	20307149	20307149	684161847	Arginine metabolism regulation protein II	Arginine metabolism regulation protein II	GI:684161847	GeneID:20307149	GeneID:20307149	H6BTE3	H6BTE3_EXODN	HMPREF1120_02510	HMPREF1120_02510	XM_009156553.1	XP_009154801	XP_009154801.1	XP_009154801.1	XP_009154801.1	arginine metabolism regulation protein II	arginine metabolism regulation protein II
XP_009154817.1	5970.XP_009154817.1	https://smart.embl.de/smart/DDvec.cgi?smart=101:TRANS(61|83)+	Uncharacterized protein	20307165	20307165	684161879	GI:684161879	GeneID:20307165	GeneID:20307165	H6BTF9	H6BTF9_EXODN	HMPREF1120_02526	HMPREF1120_02526	Hypothetical protein	Uncharacterized protein	XM_009156569.1	XP_009154817	XP_009154817.1	XP_009154817.1	XP_009154817.1	hypothetical protein	hypothetical protein
XP_009154820.1	5970.XP_009154820.1	https://smart.embl.de/smart/DDvec.cgi?smart=545:Pfam_GIDA(6|140)+Pfam_Pyr_redox(209|296)+Pfam_Pyr_redox_dim(428|540)+	Mercuric reductase	20307168	20307168	684161885	GI:684161885	GeneID:20307168	GeneID:20307168	H6BTG2	H6BTG2_EXODN	HMPREF1120_02529	HMPREF1120_02529	Mercuric reductase	Mercuric reductase	XM_009156572.1	XP_009154820	XP_009154820.1	XP_009154820.1	XP_009154820.1	mercuric reductase	mercuric reductase
XP_009154821.1	5970.XP_009154821.1	https://smart.embl.de/smart/DDvec.cgi?smart=1165:Pfam_An_peroxidase(157|243)+Pfam_An_peroxidase(240|622)+Pfam_p450(951|1065)+	Fatty acid oxygenase PpoA	20307169	20307169	684161887	Fatty acid oxygenase PpoA	Fatty acid oxygenase PpoA	GI:684161887	GeneID:20307169	GeneID:20307169	H6BTG3	H6BTG3_EXODN	HMPREF1120_02530	HMPREF1120_02530	XM_009156573.1	XP_009154821	XP_009154821.1	XP_009154821.1	XP_009154821.1	fatty acid oxygenase PpoA	fatty acid oxygenase PpoA
XP_009154845.1	5970.XP_009154845.1	https://smart.embl.de/smart/DDvec.cgi?smart=344:Pfam_Abhydrolase_3(94|311)+	Uncharacterized protein	20307192	20307192	684161935	GI:684161935	GeneID:20307192	GeneID:20307192	H6BPC5	H6BPC5_EXODN	HMPREF1120_02553	HMPREF1120_02553	Hypothetical protein	Uncharacterized protein	XM_009156597.1	XP_009154845	XP_009154845.1	XP_009154845.1	XP_009154845.1	hypothetical protein	hypothetical protein
XP_009154860.1	5970.XP_009154860.1	https://smart.embl.de/smart/DDvec.cgi?smart=1161:Pfam_Rad4(423|597)+Pfam_BHD_1(608|664)+BHD_2(667|730)+BHD_3(737|811)+	Xeroderma pigmentosum group C-complementing protein	20307207	20307207	684161965	GI:684161965	GeneID:20307207	GeneID:20307207	H6BPE0	H6BPE0_EXODN	HMPREF1120_02568	HMPREF1120_02568	XM_009156612.1	XP_009154860	XP_009154860.1	XP_009154860.1	XP_009154860.1
XP_009154866.1	5970.XP_009154866.1	https://smart.embl.de/smart/DDvec.cgi?smart=479:Pfam_FA_desaturase(82|319)+COIL(322|346)+Cyt-b5(357|432)+	Acyl-CoA desaturase; Stearyl-CoA desaturase that utilizes O(2) and electrons from reduced cytochrome b5 to introduce the first double bond into saturated fatty acyl-CoA substrates	20307213	20307213	684161977	Acyl-CoA desaturase	GI:684161977	GeneID:20307213	GeneID:20307213	H6BPE6	H6BPE6_EXODN	HMPREF1120_02574	HMPREF1120_02574	XM_009156618.1	XP_009154866	XP_009154866.1	XP_009154866.1	XP_009154866.1	acyl-CoA desaturase	acyl-CoA desaturase
XP_009154869.1	5970.XP_009154869.1	https://smart.embl.de/smart/DDvec.cgi?smart=507:SIGNAL(1|27)+TRANS(218|240)+RING(349|390)+	Uncharacterized protein	20307216	20307216	684161983	GI:684161983	GeneID:20307216	GeneID:20307216	H6BPE9	H6BPE9_EXODN	HMPREF1120_02577	HMPREF1120_02577	Hypothetical protein	Uncharacterized protein	XM_009156621.1	XP_009154869	XP_009154869.1	XP_009154869.1	XP_009154869.1	hypothetical protein	hypothetical protein
XP_009154870.1	5970.XP_009154870.1	https://smart.embl.de/smart/DDvec.cgi?smart=388:Pfam_TB2_DP1_HVA22(18|94)+	Protein YOP1; Jumonji domain-containing protein 1	20307217	20307217	684161985	GI:684161985	GeneID:20307217	GeneID:20307217	H6BPF0	H6BPF0_EXODN	HMPREF1120_02578	HMPREF1120_02578	Jumonji domain-containing protein 1	Protein YOP1	XM_009156622.1	XP_009154870	XP_009154870.1	XP_009154870.1	XP_009154870.1	jumonji domain-containing protein 1	jumonji domain-containing protein 1
XP_009154871.1	5970.XP_009154871.1	https://smart.embl.de/smart/DDvec.cgi?smart=359:Pfam_TANGO2(1|327)+	Uncharacterized protein	20307218	20307218	684161987	GI:684161987	GeneID:20307218	GeneID:20307218	H6BPF1	H6BPF1_EXODN	HMPREF1120_02579	HMPREF1120_02579	Hypothetical protein	Uncharacterized protein	XM_009156623.1	XP_009154871	XP_009154871.1	XP_009154871.1	XP_009154871.1	hypothetical protein	hypothetical protein
XP_009154879.1	5970.XP_009154879.1	http://smart.embl.de/smart/DDt.cgi?smart=205:	Uncharacterized protein	20307226	20307226	684162003	GI:684162003	GeneID:20307226	GeneID:20307226	H6BPF9	H6BPF9_EXODN	HMPREF1120_02587	HMPREF1120_02587	Hypothetical protein	Uncharacterized protein	XM_009156631.1	XP_009154879	XP_009154879.1	XP_009154879.1	XP_009154879.1	hypothetical protein	hypothetical protein
XP_009154882.1	5970.XP_009154882.1	https://smart.embl.de/smart/DDvec.cgi?smart=695:TRANS(56|78)+Pfam_p450(207|555)+Pfam_p450(581|643)+	Uncharacterized protein; Belongs to the cytochrome P450 family	20307229	20307229	684162009	GI:684162009	GeneID:20307229	GeneID:20307229	H6BPG2	H6BPG2_EXODN	HMPREF1120_02590	HMPREF1120_02590	Hypothetical protein	Uncharacterized protein	XM_009156634.1	XP_009154882	XP_009154882.1	XP_009154882.1	XP_009154882.1	hypothetical protein	hypothetical protein
XP_009154885.1	5970.XP_009154885.1	https://smart.embl.de/smart/DDvec.cgi?smart=776:TRANS(35|57)+Pfam_Peptidase_M13_N(107|510)+Pfam_Peptidase_M13(572|774)+	Endothelin-converting enzyme	20307232	20307232	684162015	Endothelin-converting enzyme	Endothelin-converting enzyme	GI:684162015	GeneID:20307232	GeneID:20307232	H6BPG5	H6BPG5_EXODN	HMPREF1120_02593	HMPREF1120_02593	XM_009156637.1	XP_009154885	XP_009154885.1	XP_009154885.1	XP_009154885.1	endothelin-converting enzyme	endothelin-converting enzyme
XP_009154887.1	5970.XP_009154887.1	https://smart.embl.de/smart/DDvec.cgi?smart=2236:POLBc(278|881)+DUF1744(1516|1908)+	DNA polymerase epsilon catalytic subunit A	20307234	20307234	684162019	DNA polymerase epsilon catalytic subunit A	DNA polymerase epsilon catalytic subunit A	DNA polymerase epsilon catalytic subunit A	GI:684162019	GeneID:20307234	GeneID:20307234	H6BPG7	H6BPG7_EXODN	HMPREF1120_02595	HMPREF1120_02595	XM_009156639.1	XP_009154887	XP_009154887.1	XP_009154887.1	XP_009154887.1
XP_009154896.1	5970.XP_009154896.1	https://smart.embl.de/smart/DDvec.cgi?smart=449:Pfam_Aminotran_1_2(39|400)+	Aminotransferase	20307243	20307243	684162037	Aminotransferase	Aminotransferase	GI:684162037	GeneID:20307243	GeneID:20307243	H6BPT4	H6BPT4_EXODN	HMPREF1120_02604	HMPREF1120_02604	XM_009156648.1	XP_009154896	XP_009154896.1	XP_009154896.1	XP_009154896.1	aminotransferase	aminotransferase
XP_009154914.1	5970.XP_009154914.1	https://smart.embl.de/smart/DDvec.cgi?smart=208:RAB(16|179)+	GTP-binding protein ypt1	20307260	20307260	684162073	GI:684162073	GTP-binding protein ypt1	GTP-binding protein ypt1	GTP-binding protein ypt1	GeneID:20307260	GeneID:20307260	H6BPV2	H6BPV2_EXODN	HMPREF1120_02621	HMPREF1120_02621	XM_009156666.1	XP_009154914	XP_009154914.1	XP_009154914.1	XP_009154914.1
XP_009154915.1	5970.XP_009154915.1	http://smart.embl.de/smart/DDt.cgi?smart=124:	Uncharacterized protein	20307261	20307261	684162075	GI:684162075	GeneID:20307261	GeneID:20307261	H6BPV3	H6BPV3_EXODN	HMPREF1120_02622	HMPREF1120_02622	Hypothetical protein	Uncharacterized protein	XM_009156667.1	XP_009154915	XP_009154915.1	XP_009154915.1	XP_009154915.1	hypothetical protein	hypothetical protein
XP_009154916.1	5970.XP_009154916.1	http://smart.embl.de/smart/DDt.cgi?smart=375:	Uncharacterized protein	20307262	20307262	684162077	GI:684162077	GeneID:20307262	GeneID:20307262	H6BPV4	H6BPV4_EXODN	HMPREF1120_02623	HMPREF1120_02623	Hypothetical protein	Uncharacterized protein	XM_009156668.1	XP_009154916	XP_009154916.1	XP_009154916.1	XP_009154916.1	hypothetical protein	hypothetical protein
XP_009154928.1	5970.XP_009154928.1	https://smart.embl.de/smart/DDvec.cgi?smart=843:Pfam_Carn_acyltransf(78|736)+	Carnitine O-acetyltransferase; Belongs to the carnitine/choline acetyltransferase family	20307274	20307274	684162101	Carnitine O-acetyltransferase	Carnitine O-acetyltransferase	GI:684162101	GeneID:20307274	GeneID:20307274	H6BQ21	H6BQ21_EXODN	HMPREF1120_02635	HMPREF1120_02635	XM_009156680.1	XP_009154928	XP_009154928.1	XP_009154928.1	XP_009154928.1	carnitine O-acetyltransferase	carnitine O-acetyltransferase
XP_009154929.1	5970.XP_009154929.1	https://smart.embl.de/smart/DDvec.cgi?smart=1508:COIL(54|84)+Pfam_JmjN(98|131)+AT_hook(296|308)+JmjC(386|549)+PHD(693|755)+	Jumonji domain-containing protein 2	20307275	20307275	684162103	GI:684162103	GeneID:20307275	GeneID:20307275	H6BQ22	H6BQ22_EXODN	HMPREF1120_02636	HMPREF1120_02636	Jumonji domain-containing protein 2	Jumonji domain-containing protein 2	XM_009156681.1	XP_009154929	XP_009154929.1	XP_009154929.1	XP_009154929.1	jumonji domain-containing protein 2	jumonji domain-containing protein 2
XP_009154930.1	5970.XP_009154930.1	https://smart.embl.de/smart/DDvec.cgi?smart=300:Pfam_DUF572(1|288)+	Uncharacterized protein	20307276	20307276	684162105	GI:684162105	GeneID:20307276	GeneID:20307276	H6BQ23	H6BQ23_EXODN	HMPREF1120_02637	HMPREF1120_02637	Hypothetical protein	Uncharacterized protein	XM_009156682.1	XP_009154930	XP_009154930.1	XP_009154930.1	XP_009154930.1	hypothetical protein	hypothetical protein
XP_009154940.1	5970.XP_009154940.1	http://smart.embl.de/smart/DDt.cgi?smart=293:	Uncharacterized protein	20307286	20307286	684162125	GI:684162125	GeneID:20307286	GeneID:20307286	H6BQ33	H6BQ33_EXODN	HMPREF1120_02647	HMPREF1120_02647	Hypothetical protein	Uncharacterized protein	XM_009156692.1	XP_009154940	XP_009154940.1	XP_009154940.1	XP_009154940.1	hypothetical protein	hypothetical protein
XP_009154952.1	5970.XP_009154952.1	https://smart.embl.de/smart/DDvec.cgi?smart=484:Pfam_Pyr_redox_2(6|162)+	Salicylate hydroxylase	20307298	20307298	684162149	GI:684162149	GeneID:20307298	GeneID:20307298	H6BQ45	H6BQ45_EXODN	HMPREF1120_02659	HMPREF1120_02659	Salicylate hydroxylase	Salicylate hydroxylase	XM_009156704.1	XP_009154952	XP_009154952.1	XP_009154952.1	XP_009154952.1	salicylate hydroxylase	salicylate hydroxylase
XP_009154964.1	5970.XP_009154964.1	http://smart.embl.de/smart/DDt.cgi?smart=623:	Uncharacterized protein	20307310	20307310	684162173	GI:684162173	GeneID:20307310	GeneID:20307310	H6BQ57	H6BQ57_EXODN	HMPREF1120_02671	HMPREF1120_02671	Hypothetical protein	Uncharacterized protein	XM_009156716.1	XP_009154964	XP_009154964.1	XP_009154964.1	XP_009154964.1	hypothetical protein	hypothetical protein
XP_009154972.1	5970.XP_009154972.1	http://smart.embl.de/smart/DDt.cgi?smart=179:	Uncharacterized protein	20307318	20307318	684162189	GI:684162189	GeneID:20307318	GeneID:20307318	H6BQ65	H6BQ65_EXODN	HMPREF1120_02679	HMPREF1120_02679	Hypothetical protein	Uncharacterized protein	XM_009156724.1	XP_009154972	XP_009154972.1	XP_009154972.1	XP_009154972.1	hypothetical protein	hypothetical protein
KAE1	5970.XP_009154983.1	https://smart.embl.de/smart/DDvec.cgi?smart=349:Pfam_Peptidase_M22(28|314)+	tRNA N6-adenosine threonylcarbamoyltransferase; Component of the EKC/KEOPS complex that is required for the formation of a threonylcarbamoyl group on adenosine at position 37 (t(6)A37) in tRNAs that read codons beginning with adenine. The complex is probably involved in the transfer of the threonylcarbamoyl moiety of threonylcarbamoyl-AMP (TC-AMP) to the N6 group of A37. KAE1 likely plays a direc…	20307329	20307329	684162211	GI:684162211	GeneID:20307329	GeneID:20307329	Glycoprotein endopeptidase kae1	H6BQC9	H6BQC9_EXODN	HMPREF1120_02690	HMPREF1120_02690	KAE1	XM_009156735.1	XP_009154983	XP_009154983.1	XP_009154983.1	XP_009154983.1	glycoprotein endopeptidase kae1	glycoprotein endopeptidase kae1	tRNA N6-adenosine threonylcarbamoyltransferase
XP_009154991.1	5970.XP_009154991.1	https://smart.embl.de/smart/DDvec.cgi?smart=1345:Pfam_UCH(446|709)+MORN(1221|1243)+MORN(1245|1266)+Pfam_MORN(1271|1290)+RING(1298|1332)+	Ubiquitin thiolesterase	20307337	20307337	684162227	GI:684162227	GeneID:20307337	GeneID:20307337	H6BQD7	H6BQD7_EXODN	HMPREF1120_02698	HMPREF1120_02698	Ubiquitin thiolesterase	Ubiquitin thiolesterase	XM_009156743.1	XP_009154991	XP_009154991.1	XP_009154991.1	XP_009154991.1	ubiquitin thiolesterase	ubiquitin thiolesterase
XP_009155014.1	5970.XP_009155014.1	http://smart.embl.de/smart/DDt.cgi?smart=587:	Uncharacterized protein	20307360	20307360	684162273	GI:684162273	GeneID:20307360	GeneID:20307360	H6BQG0	H6BQG0_EXODN	HMPREF1120_02721	HMPREF1120_02721	Hypothetical protein	Uncharacterized protein	XM_009156766.1	XP_009155014	XP_009155014.1	XP_009155014.1	XP_009155014.1	hypothetical protein	hypothetical protein
XP_009155015.1	5970.XP_009155015.1	http://smart.embl.de/smart/DDt.cgi?smart=161:	Uncharacterized protein	20307361	20307361	684162275	GI:684162275	GeneID:20307361	GeneID:20307361	H6BQG1	H6BQG1_EXODN	HMPREF1120_02722	HMPREF1120_02722	Hypothetical protein	Uncharacterized protein	XM_009156767.1	XP_009155015	XP_009155015.1	XP_009155015.1	XP_009155015.1	hypothetical protein	hypothetical protein
XP_009155016.1	5970.XP_009155016.1	http://smart.embl.de/smart/DDt.cgi?smart=265:	Uncharacterized protein	20307362	20307362	684162277	GI:684162277	GeneID:20307362	GeneID:20307362	H6BQG2	H6BQG2_EXODN	HMPREF1120_02723	HMPREF1120_02723	Hypothetical protein	Uncharacterized protein	XM_009156768.1	XP_009155016	XP_009155016.1	XP_009155016.1	XP_009155016.1	hypothetical protein	hypothetical protein
XP_009155025.1	5970.XP_009155025.1	https://smart.embl.de/smart/DDvec.cgi?smart=987:Pfam_DNA_photolyase(52|218)+Pfam_FAD_binding_7(456|748)+	Cryptochrome	20307371	20307371	684162295	Cryptochrome	Cryptochrome	GI:684162295	GeneID:20307371	GeneID:20307371	H6BQH1	H6BQH1_EXODN	HMPREF1120_02732	HMPREF1120_02732	XM_009156777.1	XP_009155025	XP_009155025.1	XP_009155025.1	XP_009155025.1	cryptochrome	cryptochrome
XP_009155026.1	5970.XP_009155026.1	https://smart.embl.de/smart/DDvec.cgi?smart=1030:Pfam_Glyco_hydro_3(90|369)+Pfam_Glyco_hydro_3_C(429|685)+Fn3_like(813|879)+Pfam_PIR(929|943)+Pfam_PIR(945|959)+Pfam_PIR(961|977)+Pfam_PIR(980|996)+	Beta-glucosidase; Belongs to the glycosyl hydrolase 3 family	20307372	20307372	684162297	Beta-glucosidase	Beta-glucosidase	GI:684162297	GeneID:20307372	GeneID:20307372	H6BQH2	H6BQH2_EXODN	HMPREF1120_02733	HMPREF1120_02733	XM_009156778.1	XP_009155026	XP_009155026.1	XP_009155026.1	XP_009155026.1	beta-glucosidase	beta-glucosidase
XP_009155028.1	5970.XP_009155028.1	https://smart.embl.de/smart/DDvec.cgi?smart=834:SIGNAL(1|20)+Pfam_DUF5127(116|354)+Pfam_DUF4965(358|499)+Pfam_DUF4965(531|583)+Pfam_DUF1793(589|790)+	Uncharacterized protein	20307374	20307374	684162301	GI:684162301	GeneID:20307374	GeneID:20307374	H6BQH4	H6BQH4_EXODN	HMPREF1120_02735	HMPREF1120_02735	Hypothetical protein	Uncharacterized protein	XM_009156780.1	XP_009155028	XP_009155028.1	XP_009155028.1	XP_009155028.1	hypothetical protein	hypothetical protein
XP_009155034.1	5970.XP_009155034.1	https://smart.embl.de/smart/DDvec.cgi?smart=899:SIGNAL(1|21)+Pfam_PA(199|296)+TRANS(614|636)+RING(744|786)+	Uncharacterized protein	20307380	20307380	684162313	GI:684162313	GeneID:20307380	GeneID:20307380	H6BQN4	H6BQN4_EXODN	HMPREF1120_02741	HMPREF1120_02741	Hypothetical protein	Uncharacterized protein	XM_009156786.1	XP_009155034	XP_009155034.1	XP_009155034.1	XP_009155034.1	hypothetical protein	hypothetical protein
XP_009155040.1	5970.XP_009155040.1	https://smart.embl.de/smart/DDvec.cgi?smart=494:Pfam_MFS_1(62|397)+TRANS(401|423)+TRANS(463|482)+	MFS transporter, MCP family, solute carrier family 16 (monocarboxylic acid transporters), member 10	20307386	20307386	684162325	GI:684162325	GeneID:20307386	GeneID:20307386	H6BQP0	H6BQP0_EXODN	HMPREF1120_02747	HMPREF1120_02747	XM_009156792.1	XP_009155040	XP_009155040.1	XP_009155040.1	XP_009155040.1
XP_009155046.1	5970.XP_009155046.1	https://smart.embl.de/smart/DDvec.cgi?smart=165:Pfam_Cu-oxidase_2(1|86)+TRANS(140|162)+	Ferrooxidoreductase Fet3; Belongs to the multicopper oxidase family	20307392	20307392	684162337	Ferrooxidoreductase Fet3	Ferrooxidoreductase Fet3	GI:684162337	GeneID:20307392	GeneID:20307392	H6BQP6	H6BQP6_EXODN	HMPREF1120_02753	HMPREF1120_02753	XM_009156798.1	XP_009155046	XP_009155046.1	XP_009155046.1	XP_009155046.1	ferrooxidoreductase Fet3	ferrooxidoreductase Fet3
XP_009155047.1	5970.XP_009155047.1	https://smart.embl.de/smart/DDvec.cgi?smart=418:Pfam_Cu-oxidase_3(34|153)+Pfam_Cu-oxidase(159|309)+	Extracellular dihydrogeodin oxidase/laccase	20307393	20307393	684162339	Extracellular dihydrogeodin oxidase/laccase	Extracellular dihydrogeodin oxidase/laccase	GI:684162339	GeneID:20307393	GeneID:20307393	H6BQP7	H6BQP7_EXODN	HMPREF1120_02754	HMPREF1120_02754	XM_009156799.1	XP_009155047	XP_009155047.1	XP_009155047.1	XP_009155047.1	extracellular dihydrogeodin oxidase/laccase	extracellular dihydrogeodin oxidase/laccase
XP_009155049.1	5970.XP_009155049.1	https://smart.embl.de/smart/DDvec.cgi?smart=118:Pfam_Atg8(13|116)+	Autophagy-like protein 8; Belongs to the ATG8 family	20307395	20307395	684162343	Autophagy-like protein 8	Autophagy-related protein	GI:684162343	GeneID:20307395	GeneID:20307395	H6BQP9	H6BQP9_EXODN	HMPREF1120_02756	HMPREF1120_02756	XM_009156801.1	XP_009155049	XP_009155049.1	XP_009155049.1	XP_009155049.1	autophagy-like protein 8	autophagy-like protein 8
XP_009155050.1	5970.XP_009155050.1	https://smart.embl.de/smart/DDvec.cgi?smart=443:Pfam_Methyltransf_2(160|397)+	O-methyltransferase	20307396	20307396	684162345	GI:684162345	GeneID:20307396	GeneID:20307396	H6BQQ0	H6BQQ0_EXODN	HMPREF1120_02757	HMPREF1120_02757	O-methyltransferase	O-methyltransferase	O-methyltransferase	XM_009156802.1	XP_009155050	XP_009155050.1	XP_009155050.1	XP_009155050.1
XP_009155051.1	5970.XP_009155051.1	http://smart.embl.de/smart/DDt.cgi?smart=659:	Uncharacterized protein	20307397	20307397	684162347	GI:684162347	GeneID:20307397	GeneID:20307397	H6BQQ1	H6BQQ1_EXODN	HMPREF1120_02758	HMPREF1120_02758	Hypothetical protein	Uncharacterized protein	XM_009156803.1	XP_009155051	XP_009155051.1	XP_009155051.1	XP_009155051.1	hypothetical protein	hypothetical protein
XP_009155059.1	5970.XP_009155059.1	https://smart.embl.de/smart/DDvec.cgi?smart=615:Pfam_NAD_binding_8(115|165)+Pfam_Rieske(529|612)+	Oxidoreductase	20307405	20307405	684162363	GI:684162363	GeneID:20307405	GeneID:20307405	H6BQQ9	H6BQQ9_EXODN	HMPREF1120_02766	HMPREF1120_02766	Oxidoreductase	Oxidoreductase	XM_009156811.1	XP_009155059	XP_009155059.1	XP_009155059.1	XP_009155059.1	oxidoreductase	oxidoreductase
XP_009155069.1	5970.XP_009155069.1	https://smart.embl.de/smart/DDvec.cgi?smart=443:Pfam_Oxidored_FMN(14|364)+	NADH oxidase	20307415	20307415	684162383	GI:684162383	GeneID:20307415	GeneID:20307415	H6BQR9	H6BQR9_EXODN	HMPREF1120_02776	HMPREF1120_02776	NADH oxidase	NADH oxidase	NADH oxidase	XM_009156821.1	XP_009155069	XP_009155069.1	XP_009155069.1	XP_009155069.1
XP_009155071.1	5970.XP_009155071.1	https://smart.embl.de/smart/DDvec.cgi?smart=458:Pfam_Thiolase_N(9|232)+Pfam_Thiolase_C(262|394)+	Sterol carrier protein 2; Belongs to the thiolase family	20307417	20307417	684162387	GI:684162387	GeneID:20307417	GeneID:20307417	H6BQS1	H6BQS1_EXODN	HMPREF1120_02778	HMPREF1120_02778	Sterol carrier protein 2	Sterol carrier protein 2	XM_009156823.1	XP_009155071	XP_009155071.1	XP_009155071.1	XP_009155071.1	sterol carrier protein 2	sterol carrier protein 2
XP_009155086.1	5970.XP_009155086.1	https://smart.embl.de/smart/DDvec.cgi?smart=445:Pfam_Peptidase_C15(29|142)+	Pyroglutamyl-peptidase	20307431	20307431	684162417	GI:684162417	GeneID:20307431	GeneID:20307431	H6BQZ0	H6BQZ0_EXODN	HMPREF1120_02792	HMPREF1120_02792	Pyroglutamyl-peptidase	Pyroglutamyl-peptidase	XM_009156838.1	XP_009155086	XP_009155086.1	XP_009155086.1	XP_009155086.1	pyroglutamyl-peptidase	pyroglutamyl-peptidase
XP_009155096.1	5970.XP_009155096.1	https://smart.embl.de/smart/DDvec.cgi?smart=574:Pfam_Rad52_Rad22(34|186)+	DNA repair and recombination protein RAD52	20307441	20307441	684162437	DNA repair and recombination protein RAD52	DNA repair and recombination protein RAD52	DNA repair and recombination protein RAD52	GI:684162437	GeneID:20307441	GeneID:20307441	H6BR00	H6BR00_EXODN	HMPREF1120_02802	HMPREF1120_02802	XM_009156848.1	XP_009155096	XP_009155096.1	XP_009155096.1	XP_009155096.1
XP_009155098.1	5970.XP_009155098.1	https://smart.embl.de/smart/DDvec.cgi?smart=566:GAL4(50|94)+	Uncharacterized protein	20307443	20307443	684162441	GI:684162441	GeneID:20307443	GeneID:20307443	H6BR02	H6BR02_EXODN	HMPREF1120_02804	HMPREF1120_02804	Hypothetical protein	Uncharacterized protein	XM_009156850.1	XP_009155098	XP_009155098.1	XP_009155098.1	XP_009155098.1	hypothetical protein	hypothetical protein
XP_009155100.1	5970.XP_009155100.1	https://smart.embl.de/smart/DDvec.cgi?smart=927:DEXDc(132|346)+HELICc(462|548)+	DNA polymerase theta subunit	20307445	20307445	684162445	DNA polymerase theta subunit	DNA polymerase theta subunit	DNA polymerase theta subunit	GI:684162445	GeneID:20307445	GeneID:20307445	H6BR04	H6BR04_EXODN	HMPREF1120_02806	HMPREF1120_02806	XM_009156852.1	XP_009155100	XP_009155100.1	XP_009155100.1	XP_009155100.1
XP_009155105.1	5970.XP_009155105.1	http://smart.embl.de/smart/DDt.cgi?smart=563:	Uncharacterized protein	20307450	20307450	684162455	GI:684162455	GeneID:20307450	GeneID:20307450	H6BR09	H6BR09_EXODN	HMPREF1120_02811	HMPREF1120_02811	Hypothetical protein	Uncharacterized protein	XM_009156857.1	XP_009155105	XP_009155105.1	XP_009155105.1	XP_009155105.1	hypothetical protein	hypothetical protein
XP_009155128.1	5970.XP_009155128.1	http://smart.embl.de/smart/DDt.cgi?smart=577:	Uncharacterized protein	20307473	20307473	684162501	GI:684162501	GeneID:20307473	GeneID:20307473	H6BR32	H6BR32_EXODN	HMPREF1120_02834	HMPREF1120_02834	Hypothetical protein	Uncharacterized protein	XM_009156880.1	XP_009155128	XP_009155128.1	XP_009155128.1	XP_009155128.1	hypothetical protein	hypothetical protein
XP_009155138.1	5970.XP_009155138.1	http://smart.embl.de/smart/DDt.cgi?smart=608:	Uncharacterized protein	20307483	20307483	684162521	GI:684162521	GeneID:20307483	GeneID:20307483	H6BR96	H6BR96_EXODN	HMPREF1120_02844	HMPREF1120_02844	Hypothetical protein	Uncharacterized protein	XM_009156890.1	XP_009155138	XP_009155138.1	XP_009155138.1	XP_009155138.1	hypothetical protein	hypothetical protein
XP_009155147.1	5970.XP_009155147.1	https://smart.embl.de/smart/DDvec.cgi?smart=1201:UIM(349|368)+Pfam_Tyr-DNA_phospho(663|778)+Pfam_Tyr-DNA_phospho(784|1189)+	Uncharacterized protein	20307490	20307491	20307491	684162537	684162539	858893	GI:684162537	GI:684162539	GeneID:20307490	GeneID:20307491	GeneID:20307491	H6BRA6	H6BRA6_EXODN	HMPREF1120_02852	HMPREF1120_02852	Hypothetical protein	Uncharacterized protein	XM_009156900.1	XP_009155147	XP_009155147.1	XP_009155147.1	XP_009155147.1	XP_009155148.1	hypothetical protein	hypothetical protein	taxon:858893
XP_009155149.1	5970.XP_009155149.1	https://smart.embl.de/smart/DDvec.cgi?smart=345:Pfam_SARAF(9|345)+	Uncharacterized protein; Catalytic site [active]	197221	20307491	20307492	20307492	253552	265651	684162541	684162543	858893	CDD:197221	CDD:253552	CDD:265651	GI:684162541	GI:684162543	GeneID:20307491	GeneID:20307492	GeneID:20307492	H6BRA7	H6BRA7_EXODN	HMPREF1120_02853	HMPREF1120_02853	Hypothetical protein	Uncharacterized protein	XM_009156901.1	XP_009155149	XP_009155149.1	XP_009155149.1	XP_009155149.1	hypothetical protein	hypothetical protein	taxon:858893
XP_009155151.1	5970.XP_009155151.1	https://smart.embl.de/smart/DDvec.cgi?smart=776:COIL(27|57)+AAA(548|676)+	AAA family ATPase	20307494	20307494	684162547	AAA family ATPase	AAA family ATPase	AAA family ATPase	GI:684162547	GeneID:20307494	GeneID:20307494	H6BRA9	H6BRA9_EXODN	HMPREF1120_02855	HMPREF1120_02855	XM_009156903.1	XP_009155151	XP_009155151.1	XP_009155151.1	XP_009155151.1
XP_009155155.1	5970.XP_009155155.1	https://smart.embl.de/smart/DDvec.cgi?smart=622:LRR(305|327)+LRR(328|351)+	Uncharacterized protein	20307498	20307498	684162555	GI:684162555	GeneID:20307498	GeneID:20307498	H6BRB3	H6BRB3_EXODN	HMPREF1120_02859	HMPREF1120_02859	Hypothetical protein	Uncharacterized protein	XM_009156907.1	XP_009155155	XP_009155155.1	XP_009155155.1	XP_009155155.1	hypothetical protein	hypothetical protein
XP_009155159.1	5970.XP_009155159.1	https://smart.embl.de/smart/DDvec.cgi?smart=599:TRANS(10|27)+TRANS(32|54)+TRANS(74|96)+TRANS(153|175)+Pfam_SQS_PSY(295|583)+	Phytoene synthase	20307502	20307502	684162563	GI:684162563	GeneID:20307502	GeneID:20307502	H6BRB7	H6BRB7_EXODN	HMPREF1120_02863	HMPREF1120_02863	Phytoene synthase	Phytoene synthase	XM_009156911.1	XP_009155159	XP_009155159.1	XP_009155159.1	XP_009155159.1	phytoene synthase	phytoene synthase
XP_009155160.1	5970.XP_009155160.1	https://smart.embl.de/smart/DDvec.cgi?smart=714:Pfam_RPE65(22|635)+	Carotenoid cleavage dioxygenase	20307503	20307503	684162565	Carotenoid cleavage dioxygenase	Carotenoid cleavage dioxygenase	GI:684162565	GeneID:20307503	GeneID:20307503	H6BRB8	H6BRB8_EXODN	HMPREF1120_02864	HMPREF1120_02864	XM_009156912.1	XP_009155160	XP_009155160.1	XP_009155160.1	XP_009155160.1	carotenoid cleavage dioxygenase	carotenoid cleavage dioxygenase
XP_009155172.1	5970.XP_009155172.1	https://smart.embl.de/smart/DDvec.cgi?smart=741:WD40(247|285)+WD40(356|395)+WD40(398|439)+WD40(445|484)+WD40(523|568)+WD40(592|644)+	1-alkyl-2-acetylglycerophosphocholine esterase	1-alkyl-2-acetylglycerophosphocholine esterase	1-alkyl-2-acetylglycerophosphocholine esterase	1-alkyl-2-acetylglycerophosphocholine esterase	20307515	20307515	684162589	GI:684162589	GeneID:20307515	GeneID:20307515	H6BRD0	H6BRD0_EXODN	HMPREF1120_02876	HMPREF1120_02876	XM_009156924.1	XP_009155172	XP_009155172.1	XP_009155172.1	XP_009155172.1
XP_009155174.1	5970.XP_009155174.1	https://smart.embl.de/smart/DDvec.cgi?smart=391:RRM(120|195)+	Uncharacterized protein	20307517	20307517	684162593	GI:684162593	GeneID:20307517	GeneID:20307517	H6BRD2	H6BRD2_EXODN	HMPREF1120_02878	HMPREF1120_02878	Hypothetical protein	Uncharacterized protein	XM_009156926.1	XP_009155174	XP_009155174.1	XP_009155174.1	XP_009155174.1	hypothetical protein	hypothetical protein
XP_009155175.1	5970.XP_009155175.1	https://smart.embl.de/smart/DDvec.cgi?smart=812:COIL(21|55)+Fungal_trans(334|407)+	Uncharacterized protein	20307518	20307518	684162595	GI:684162595	GeneID:20307518	GeneID:20307518	H6BRD3	H6BRD3_EXODN	HMPREF1120_02879	HMPREF1120_02879	Hypothetical protein	Uncharacterized protein	XM_009156927.1	XP_009155175	XP_009155175.1	XP_009155175.1	XP_009155175.1	hypothetical protein	hypothetical protein
XP_009155176.1	5970.XP_009155176.1	https://smart.embl.de/smart/DDvec.cgi?smart=689:SIGNAL(1|20)+	Uncharacterized protein	20307519	20307519	684162597	GI:684162597	GeneID:20307519	GeneID:20307519	H6BRD4	H6BRD4_EXODN	HMPREF1120_02880	HMPREF1120_02880	Hypothetical protein	Uncharacterized protein	XM_009156928.1	XP_009155176	XP_009155176.1	XP_009155176.1	XP_009155176.1	hypothetical protein	hypothetical protein
XP_009155182.1	5970.XP_009155182.1	https://smart.embl.de/smart/DDvec.cgi?smart=800:Pfam_ING(20|123)+PHD(733|782)+	Uncharacterized protein	20307525	20307525	684162609	GI:684162609	GeneID:20307525	GeneID:20307525	H6BRE0	H6BRE0_EXODN	HMPREF1120_02886	HMPREF1120_02886	Hypothetical protein	Uncharacterized protein	XM_009156934.1	XP_009155182	XP_009155182.1	XP_009155182.1	XP_009155182.1	hypothetical protein	hypothetical protein
XP_009155183.1	5970.XP_009155183.1	http://smart.embl.de/smart/DDt.cgi?smart=810:	Uncharacterized protein	20307526	20307526	684162611	GI:684162611	GeneID:20307526	GeneID:20307526	H6BRE1	H6BRE1_EXODN	HMPREF1120_02887	HMPREF1120_02887	Hypothetical protein	Uncharacterized protein	XM_009156935.1	XP_009155183	XP_009155183.1	XP_009155183.1	XP_009155183.1	hypothetical protein	hypothetical protein
XP_009155186.1	5970.XP_009155186.1	https://smart.embl.de/smart/DDvec.cgi?smart=738:AAA(65|339)+Pfam_ABC_tran_Xtn(340|421)+AAA(494|674)+	ATP-binding cassette, sub-family F, member 3	20307529	20307529	684162617	ATP-binding cassette, sub-family F, member 3	ATP-binding cassette, sub-family F, member 3	ATP-binding cassette, sub-family F, member 3	GI:684162617	GeneID:20307529	GeneID:20307529	H6BRE4	H6BRE4_EXODN	HMPREF1120_02890	HMPREF1120_02890	XM_009156938.1	XP_009155186	XP_009155186.1	XP_009155186.1	XP_009155186.1
XP_009155187.1	5970.XP_009155187.1	https://smart.embl.de/smart/DDvec.cgi?smart=677:SIGNAL(1|22)+Pfam_Metallophos(231|519)+	Sphingomyelin phosphodiesterase	20307530	20307530	684162619	GI:684162619	GeneID:20307530	GeneID:20307530	H6BRE5	H6BRE5_EXODN	HMPREF1120_02891	HMPREF1120_02891	Sphingomyelin phosphodiesterase	Sphingomyelin phosphodiesterase	XM_009156939.1	XP_009155187	XP_009155187.1	XP_009155187.1	XP_009155187.1	sphingomyelin phosphodiesterase	sphingomyelin phosphodiesterase
XP_009155196.1	5970.XP_009155196.1	http://smart.embl.de/smart/DDt.cgi?smart=359:	Uncharacterized protein	20307539	20307539	684162637	GI:684162637	GeneID:20307539	GeneID:20307539	H6BRK6	H6BRK6_EXODN	HMPREF1120_02900	HMPREF1120_02900	Hypothetical protein	Uncharacterized protein	XM_009156948.1	XP_009155196	XP_009155196.1	XP_009155196.1	XP_009155196.1	hypothetical protein	hypothetical protein
XP_009155198.1	5970.XP_009155198.1	https://smart.embl.de/smart/DDvec.cgi?smart=473:Pfam_DAO(35|428)+	Uncharacterized protein	20307541	20307541	684162641	GI:684162641	GeneID:20307541	GeneID:20307541	H6BRK8	H6BRK8_EXODN	HMPREF1120_02902	HMPREF1120_02902	Hypothetical protein	Uncharacterized protein	XM_009156950.1	XP_009155198	XP_009155198.1	XP_009155198.1	XP_009155198.1	hypothetical protein	hypothetical protein
XP_009155200.1	5970.XP_009155200.1	https://smart.embl.de/smart/DDvec.cgi?smart=302:Pfam_SIMPL(16|296)+	Uncharacterized protein	20307543	20307543	684162645	GI:684162645	GeneID:20307543	GeneID:20307543	H6BRK9	H6BRK9_EXODN	HMPREF1120_02904	HMPREF1120_02904	Hypothetical protein	Uncharacterized protein	XM_009156952.1	XP_009155200	XP_009155200.1	XP_009155200.1	XP_009155200.1	hypothetical protein	hypothetical protein
XP_009155204.1	5970.XP_009155204.1	https://smart.embl.de/smart/DDvec.cgi?smart=335:DnaJ(29|87)+	Uncharacterized protein	20307547	20307547	684162653	GI:684162653	GeneID:20307547	GeneID:20307547	H6BRL4	H6BRL4_EXODN	HMPREF1120_02908	HMPREF1120_02908	Hypothetical protein	Uncharacterized protein	XM_009156956.1	XP_009155204	XP_009155204.1	XP_009155204.1	XP_009155204.1	hypothetical protein	hypothetical protein
XP_009155212.1	5970.XP_009155212.1	https://smart.embl.de/smart/DDvec.cgi?smart=533:TRANS(216|238)+RING(330|372)+	Uncharacterized protein	20307555	20307555	684162669	GI:684162669	GeneID:20307555	GeneID:20307555	H6BRM1	H6BRM1_EXODN	HMPREF1120_02916	HMPREF1120_02916	Hypothetical protein	Uncharacterized protein	XM_009156964.1	XP_009155212	XP_009155212.1	XP_009155212.1	XP_009155212.1	hypothetical protein	hypothetical protein
XP_009155218.1	5970.XP_009155218.1	https://smart.embl.de/smart/DDvec.cgi?smart=597:Pfam_zf-NPL4(137|281)+Pfam_NPL4(284|593)+	Uncharacterized protein	20307561	20307561	684162681	GI:684162681	GeneID:20307561	GeneID:20307561	H6BRM8	H6BRM8_EXODN	HMPREF1120_02922	HMPREF1120_02922	Hypothetical protein	Uncharacterized protein	XM_009156970.1	XP_009155218	XP_009155218.1	XP_009155218.1	XP_009155218.1	hypothetical protein	hypothetical protein
XP_009155226.1	5970.XP_009155226.1	https://smart.embl.de/smart/DDvec.cgi?smart=460:Pfam_CoA_transf_3(78|449)+	alpha-methylacyl-CoA racemase	20307569	20307569	684162697	Alpha-methylacyl-CoA racemase	GI:684162697	GeneID:20307569	GeneID:20307569	H6BRN6	H6BRN6_EXODN	HMPREF1120_02930	HMPREF1120_02930	XM_009156978.1	XP_009155226	XP_009155226.1	XP_009155226.1	XP_009155226.1	alpha-methylacyl-CoA racemase	alpha-methylacyl-CoA racemase
XP_009155231.1	5970.XP_009155231.1	https://smart.embl.de/smart/DDvec.cgi?smart=276:SIGNAL(1|18)+TRANS(132|154)+TRANS(258|275)+	Uncharacterized protein	20307574	20307574	684162707	GI:684162707	GeneID:20307574	GeneID:20307574	H6BRP1	H6BRP1_EXODN	HMPREF1120_02935	HMPREF1120_02935	Hypothetical protein	Uncharacterized protein	XM_009156983.1	XP_009155231	XP_009155231.1	XP_009155231.1	XP_009155231.1	hypothetical protein	hypothetical protein
XP_009155234.1	5970.XP_009155234.1	https://smart.embl.de/smart/DDvec.cgi?smart=636:Pfam_Sugar_tr(115|580)+	MFS transporter, SP family, galactose:H+ symporter; Belongs to the major facilitator superfamily. Sugar transporter (TC 2.A.1.1) family	20307577	20307577	684162713	GI:684162713	GeneID:20307577	GeneID:20307577	H6BRP4	H6BRP4_EXODN	HMPREF1120_02938	HMPREF1120_02938	XM_009156986.1	XP_009155234	XP_009155234.1	XP_009155234.1	XP_009155234.1
XP_009155249.1	5970.XP_009155249.1	https://smart.embl.de/smart/DDvec.cgi?smart=416:RING(258|298)+	Uncharacterized protein	20307591	20307591	684162743	GI:684162743	GeneID:20307591	GeneID:20307591	H6BRW0	H6BRW0_EXODN	HMPREF1120_02952	HMPREF1120_02952	Hypothetical protein	Uncharacterized protein	XM_009157001.1	XP_009155249	XP_009155249.1	XP_009155249.1	XP_009155249.1	hypothetical protein	hypothetical protein
XP_009155258.1	5970.XP_009155258.1	http://smart.embl.de/smart/DDt.cgi?smart=474:	Uncharacterized protein	20307600	20307600	684162761	GI:684162761	GeneID:20307600	GeneID:20307600	H6BRW9	H6BRW9_EXODN	HMPREF1120_02961	HMPREF1120_02961	Hypothetical protein	Uncharacterized protein	XM_009157010.1	XP_009155258	XP_009155258.1	XP_009155258.1	XP_009155258.1	hypothetical protein	hypothetical protein
XP_009155300.1	5970.XP_009155300.1	http://smart.embl.de/smart/DDt.cgi?smart=650:	Uncharacterized protein	20307641	20307641	684162849	GI:684162849	GeneID:20307641	GeneID:20307641	H6BUA9	H6BUA9_EXODN	HMPREF1120_03002	HMPREF1120_03002	Hypothetical protein	Uncharacterized protein	XM_009157052.1	XP_009155300	XP_009155300.1	XP_009155300.1	XP_009155300.1	hypothetical protein	hypothetical protein
XP_009155323.1	5970.XP_009155323.1	https://smart.embl.de/smart/DDvec.cgi?smart=384:Pfam_Abhydrolase_3(116|344)+	Triacylglycerol lipase	20307663	20307663	684162895	GI:684162895	GeneID:20307663	GeneID:20307663	H6BUD2	H6BUD2_EXODN	HMPREF1120_03024	HMPREF1120_03024	Triacylglycerol lipase	Triacylglycerol lipase	XM_009157075.1	XP_009155323	XP_009155323.1	XP_009155323.1	XP_009155323.1	triacylglycerol lipase	triacylglycerol lipase
XP_009155324.1	5970.XP_009155324.1	https://smart.embl.de/smart/DDvec.cgi?smart=838:WD40(85|124)+WD40(127|166)+WD40(178|217)+WD40(220|261)+WD40(500|536)+	Chromosome transmission fidelity protein 4	20307664	20307664	684162897	Chromosome transmission fidelity protein 4	Chromosome transmission fidelity protein 4	GI:684162897	GeneID:20307664	GeneID:20307664	H6BUD3	H6BUD3_EXODN	HMPREF1120_03025	HMPREF1120_03025	XM_009157076.1	XP_009155324	XP_009155324.1	XP_009155324.1	XP_009155324.1	chromosome transmission fidelity protein 4	chromosome transmission fidelity protein 4
XP_009155325.1	5970.XP_009155325.1	https://smart.embl.de/smart/DDvec.cgi?smart=192:Pfam_DUF4267(15|189)+	Uncharacterized protein	20307665	20307665	684162899	GI:684162899	GeneID:20307665	GeneID:20307665	H6BUD4	H6BUD4_EXODN	HMPREF1120_03026	HMPREF1120_03026	Hypothetical protein	Uncharacterized protein	XM_009157077.1	XP_009155325	XP_009155325.1	XP_009155325.1	XP_009155325.1	hypothetical protein	hypothetical protein
XP_009155327.1	5970.XP_009155327.1	https://smart.embl.de/smart/DDvec.cgi?smart=629:COIL(127|154)+AAA(196|387)+ClpB_D2-small(481|575)+	ATP-dependent Clp protease ATP-binding subunit ClpX	20307667	20307667	684162903	GI:684162903	GeneID:20307667	GeneID:20307667	H6BUJ1	H6BUJ1_EXODN	HMPREF1120_03028	HMPREF1120_03028	XM_009157079.1	XP_009155327	XP_009155327.1	XP_009155327.1	XP_009155327.1
XP_009155341.1	5970.XP_009155341.1	https://smart.embl.de/smart/DDvec.cgi?smart=217:COIL(22|53)+	Uncharacterized protein	20307681	20307681	684162931	GI:684162931	GeneID:20307681	GeneID:20307681	H6BUK5	H6BUK5_EXODN	HMPREF1120_03042	HMPREF1120_03042	Hypothetical protein	Uncharacterized protein	XM_009157093.1	XP_009155341	XP_009155341.1	XP_009155341.1	XP_009155341.1	hypothetical protein	hypothetical protein
XP_009155343.1	5970.XP_009155343.1	https://smart.embl.de/smart/DDvec.cgi?smart=565:ZnF_C2H2(242|267)+	Uncharacterized protein	20307683	20307683	684162935	GI:684162935	GeneID:20307683	GeneID:20307683	H6BUK7	H6BUK7_EXODN	HMPREF1120_03044	HMPREF1120_03044	Hypothetical protein	Uncharacterized protein	XM_009157095.1	XP_009155343	XP_009155343.1	XP_009155343.1	XP_009155343.1	hypothetical protein	hypothetical protein
XP_009155378.1	5970.XP_009155378.1	https://smart.embl.de/smart/DDvec.cgi?smart=1025:FACT-Spt16_Nlob(6|168)+Pfam_Peptidase_M24(181|418)+COIL(471|503)+SPT16(543|693)+Rtt106(816|906)+	X-Pro aminopeptidase	20307715	20307715	684163005	GI:684163005	GeneID:20307715	GeneID:20307715	H6BUP2	H6BUP2_EXODN	HMPREF1120_03076	HMPREF1120_03076	X-Pro aminopeptidase	X-Pro aminopeptidase	X-Pro aminopeptidase	XM_009157130.1	XP_009155378	XP_009155378.1	XP_009155378.1	XP_009155378.1
XP_009155411.1	5970.XP_009155411.1	http://smart.embl.de/smart/DDt.cgi?smart=117:	Uncharacterized protein	20307748	20307748	684163071	GI:684163071	GeneID:20307748	GeneID:20307748	H6BUY0	H6BUY0_EXODN	HMPREF1120_03109	HMPREF1120_03109	Hypothetical protein	Uncharacterized protein	XM_009157163.1	XP_009155411	XP_009155411.1	XP_009155411.1	XP_009155411.1	hypothetical protein	hypothetical protein
XP_009155412.1	5970.XP_009155412.1	https://smart.embl.de/smart/DDvec.cgi?smart=1308:Pfam_RdRP(404|1051)+	RNA-directed RNA polymerase	20307749	20307749	684163073	GI:684163073	GeneID:20307749	GeneID:20307749	H6BUY1	H6BUY1_EXODN	HMPREF1120_03110	HMPREF1120_03110	RNA-dependent RNA polymerase	RNA-directed RNA polymerase	RNA-directed RNA polymerase	XM_009157164.1	XP_009155412	XP_009155412.1	XP_009155412.1	XP_009155412.1
XP_009155416.1	5970.XP_009155416.1	https://smart.embl.de/smart/DDvec.cgi?smart=1276:TRANS(7|29)+	Uncharacterized protein	20307753	20307753	684163081	GI:684163081	GeneID:20307753	GeneID:20307753	H6BUY5	H6BUY5_EXODN	HMPREF1120_03114	HMPREF1120_03114	Hypothetical protein	Uncharacterized protein	XM_009157168.1	XP_009155416	XP_009155416.1	XP_009155416.1	XP_009155416.1	hypothetical protein	hypothetical protein
XP_009155429.1	5970.XP_009155429.1	https://smart.embl.de/smart/DDvec.cgi?smart=1618:TRANS(28|50)+TRANS(229|251)+TRANS(288|310)+TRANS(317|339)+TRANS(343|365)+TRANS(372|394)+TRANS(414|436)+AAA(501|675)+Pfam_ABC2_membrane_3(841|1219)+AAA(1286|1474)+	ABC transporter	20307766	20307766	684163107	ABC transporter	ABC transporter	ABC transporter	GI:684163107	GeneID:20307766	GeneID:20307766	H6BUZ8	H6BUZ8_EXODN	HMPREF1120_03127	HMPREF1120_03127	XM_009157181.1	XP_009155429	XP_009155429.1	XP_009155429.1	XP_009155429.1
XP_009155445.1	5970.XP_009155445.1	https://smart.embl.de/smart/DDvec.cgi?smart=513:Pfam_MFS_1(74|441)+TRANS(454|476)+	MFS transporter, ACS family, allantoate permease	20307781	20307781	684163139	GI:684163139	GeneID:20307781	GeneID:20307781	H6BV70	H6BV70_EXODN	HMPREF1120_03142	HMPREF1120_03142	MFS transporter, ACS family, allantoate permease	MFS transporter, ACS family, allantoate permease	MFS transporter, ACS family, allantoate permease	XM_009157197.1	XP_009155445	XP_009155445.1	XP_009155445.1	XP_009155445.1
XP_009155446.1	5970.XP_009155446.1	https://smart.embl.de/smart/DDvec.cgi?smart=405:GAL4(4|48)+	Uncharacterized protein	20307782	20307782	684163141	GI:684163141	GeneID:20307782	GeneID:20307782	H6BV71	H6BV71_EXODN	HMPREF1120_03143	HMPREF1120_03143	Hypothetical protein	Uncharacterized protein	XM_009157198.1	XP_009155446	XP_009155446.1	XP_009155446.1	XP_009155446.1	hypothetical protein	hypothetical protein
XP_009155455.1	5970.XP_009155455.1	https://smart.embl.de/smart/DDvec.cgi?smart=632:COIL(83|115)+	Uncharacterized protein	20307791	20307791	684163159	GI:684163159	GeneID:20307791	GeneID:20307791	H6BV80	H6BV80_EXODN	HMPREF1120_03152	HMPREF1120_03152	Hypothetical protein	Uncharacterized protein	XM_009157207.1	XP_009155455	XP_009155455.1	XP_009155455.1	XP_009155455.1	hypothetical protein	hypothetical protein
XP_009155456.1	5970.XP_009155456.1	https://smart.embl.de/smart/DDvec.cgi?smart=438:Pfam_DUF4243(50|376)+	Uncharacterized protein	20307792	20307792	684163161	GI:684163161	GeneID:20307792	GeneID:20307792	H6BV81	H6BV81_EXODN	HMPREF1120_03153	HMPREF1120_03153	Hypothetical protein	Uncharacterized protein	XM_009157208.1	XP_009155456	XP_009155456.1	XP_009155456.1	XP_009155456.1	hypothetical protein	hypothetical protein
XP_009155457.1	5970.XP_009155457.1	http://smart.embl.de/smart/DDt.cgi?smart=260:	Uncharacterized protein	20307793	20307793	684163163	GI:684163163	GeneID:20307793	GeneID:20307793	H6BV82	H6BV82_EXODN	HMPREF1120_03154	HMPREF1120_03154	Hypothetical protein	Uncharacterized protein	XM_009157209.1	XP_009155457	XP_009155457.1	XP_009155457.1	XP_009155457.1	hypothetical protein	hypothetical protein
XP_009155470.1	5970.XP_009155470.1	https://smart.embl.de/smart/DDvec.cgi?smart=326:TRANS(12|34)+Pfam_4HBT_2(83|257)+	Uncharacterized protein	20307806	20307806	684163189	GI:684163189	GeneID:20307806	GeneID:20307806	H6BV95	H6BV95_EXODN	HMPREF1120_03167	HMPREF1120_03167	Hypothetical protein	Uncharacterized protein	XM_009157222.1	XP_009155470	XP_009155470.1	XP_009155470.1	XP_009155470.1	hypothetical protein	hypothetical protein
XP_009155485.1	5970.XP_009155485.1	http://smart.embl.de/smart/DDt.cgi?smart=486:	Uncharacterized protein	20307821	20307821	684163219	GI:684163219	GeneID:20307821	GeneID:20307821	H6BVB0	H6BVB0_EXODN	HMPREF1120_03182	HMPREF1120_03182	Hypothetical protein	Uncharacterized protein	XM_009157237.1	XP_009155485	XP_009155485.1	XP_009155485.1	XP_009155485.1	hypothetical protein	hypothetical protein
XP_009155496.1	5970.XP_009155496.1	https://smart.embl.de/smart/DDvec.cgi?smart=506:Pfam_p450(33|490)+	Cytochrome P450 oxidoreductase	20307830	20307830	684163241	Cytochrome P450 oxidoreductase	Cytochrome P450 oxidoreductase	GI:684163241	GeneID:20307830	GeneID:20307830	H6BVH6	H6BVH6_EXODN	HMPREF1120_03191	HMPREF1120_03191	XM_009157248.1	XP_009155496	XP_009155496.1	XP_009155496.1	XP_009155496.1	cytochrome P450 oxidoreductase	cytochrome P450 oxidoreductase
XP_009155497.1	5970.XP_009155497.1	https://smart.embl.de/smart/DDvec.cgi?smart=532:Pfam_AA_permease(51|503)+	Uncharacterized protein	20307831	20307831	684163243	GI:684163243	GeneID:20307831	GeneID:20307831	H6BVH7	H6BVH7_EXODN	HMPREF1120_03192	HMPREF1120_03192	Hypothetical protein	Uncharacterized protein	XM_009157249.1	XP_009155497	XP_009155497.1	XP_009155497.1	XP_009155497.1	hypothetical protein	hypothetical protein
XP_009155499.1	5970.XP_009155499.1	https://smart.embl.de/smart/DDvec.cgi?smart=506:GAL4(31|70)+Pfam_Fungal_trans_2(118|506)+	Uncharacterized protein	20307833	20307833	684163247	GI:684163247	GeneID:20307833	GeneID:20307833	H6BVH9	H6BVH9_EXODN	HMPREF1120_03194	HMPREF1120_03194	Hypothetical protein	Uncharacterized protein	XM_009157251.1	XP_009155499	XP_009155499.1	XP_009155499.1	XP_009155499.1	hypothetical protein	hypothetical protein
XP_009155500.1	5970.XP_009155500.1	https://smart.embl.de/smart/DDvec.cgi?smart=328:Pfam_NAD_binding_10(8|211)+	Phosphoserine aminotransferase	20307834	20307834	684163249	GI:684163249	GeneID:20307834	GeneID:20307834	H6BVI0	H6BVI0_EXODN	HMPREF1120_03195	HMPREF1120_03195	Phosphoserine aminotransferase	Phosphoserine aminotransferase	XM_009157252.1	XP_009155500	XP_009155500.1	XP_009155500.1	XP_009155500.1	phosphoserine aminotransferase	phosphoserine aminotransferase
XP_009155501.1	5970.XP_009155501.1	https://smart.embl.de/smart/DDvec.cgi?smart=523:Pfam_AA_permease(33|485)+	Uncharacterized protein	20307835	20307835	684163251	GI:684163251	GeneID:20307835	GeneID:20307835	H6BVI1	H6BVI1_EXODN	HMPREF1120_03196	HMPREF1120_03196	Hypothetical protein	Uncharacterized protein	XM_009157253.1	XP_009155501	XP_009155501.1	XP_009155501.1	XP_009155501.1	hypothetical protein	hypothetical protein
XP_009155502.1	5970.XP_009155502.1	https://smart.embl.de/smart/DDvec.cgi?smart=113:Pfam_Cupin_3(36|100)+	Uncharacterized protein	20307836	20307836	684163253	GI:684163253	GeneID:20307836	GeneID:20307836	H6BVI2	H6BVI2_EXODN	HMPREF1120_03197	HMPREF1120_03197	Hypothetical protein	Uncharacterized protein	XM_009157254.1	XP_009155502	XP_009155502.1	XP_009155502.1	XP_009155502.1	hypothetical protein	hypothetical protein
XP_009155503.1	5970.XP_009155503.1	https://smart.embl.de/smart/DDvec.cgi?smart=455:Pfam_FAD_binding_3(269|343)+	Salicylate hydroxylase	20307837	20307837	684163255	GI:684163255	GeneID:20307837	GeneID:20307837	H6BVI3	H6BVI3_EXODN	HMPREF1120_03198	HMPREF1120_03198	Salicylate hydroxylase	Salicylate hydroxylase	XM_009157255.1	XP_009155503	XP_009155503.1	XP_009155503.1	XP_009155503.1	salicylate hydroxylase	salicylate hydroxylase
XP_009155504.1	5970.XP_009155504.1	https://smart.embl.de/smart/DDvec.cgi?smart=495:Pfam_NAD_binding_8(43|106)+	Flavin containing amine oxidase	20307838	20307838	684163257	Amine oxidase	Flavin containing amine oxidase	GI:684163257	GeneID:20307838	GeneID:20307838	H6BVI4	H6BVI4_EXODN	HMPREF1120_03199	HMPREF1120_03199	XM_009157256.1	XP_009155504	XP_009155504.1	XP_009155504.1	XP_009155504.1	flavin containing amine oxidase	flavin containing amine oxidase
XP_009155505.1	5970.XP_009155505.1	https://smart.embl.de/smart/DDvec.cgi?smart=456:Pfam_Sugar_tr(65|252)+Pfam_MFS_1(268|455)+	MFS transporter, MCP family, solute carrier family 16 (monocarboxylic acid transporters), member 10	20307839	20307839	684163259	GI:684163259	GeneID:20307839	GeneID:20307839	H6BVI5	H6BVI5_EXODN	HMPREF1120_03200	HMPREF1120_03200	XM_009157257.1	XP_009155505	XP_009155505.1	XP_009155505.1	XP_009155505.1
XP_009155513.1	5970.XP_009155513.1	https://smart.embl.de/smart/DDvec.cgi?smart=295:WW(14|47)+	Uncharacterized protein	20307847	20307847	684163275	GI:684163275	GeneID:20307847	GeneID:20307847	H6BVJ3	H6BVJ3_EXODN	HMPREF1120_03208	HMPREF1120_03208	Hypothetical protein	Uncharacterized protein	XM_009157265.1	XP_009155513	XP_009155513.1	XP_009155513.1	XP_009155513.1	hypothetical protein	hypothetical protein
XP_009155515.1	5970.XP_009155515.1	https://smart.embl.de/smart/DDvec.cgi?smart=1667:Pfam_Pkinase(34|288)+WD40(1125|1164)+WD40(1173|1213)+WD40(1293|1334)+WD40(1445|1502)+WD40(1627|1667)+	Phosphoinositide-3-kinase, regulatory subunit 4, p150	20307849	20307849	684163279	GI:684163279	GeneID:20307849	GeneID:20307849	H6BVJ5	H6BVJ5_EXODN	HMPREF1120_03210	HMPREF1120_03210	XM_009157267.1	XP_009155515	XP_009155515.1	XP_009155515.1	XP_009155515.1
XP_009155529.1	5970.XP_009155529.1	https://smart.embl.de/smart/DDvec.cgi?smart=483:Pfam_Ammonium_transp(33|441)+	Amt family ammonium transporter	20307863	20307863	684163307	Ammonium transporter	Amt family ammonium transporter	GI:684163307	GeneID:20307863	GeneID:20307863	H6BVK9	H6BVK9_EXODN	HMPREF1120_03224	HMPREF1120_03224	XM_009157281.1	XP_009155529	XP_009155529.1	XP_009155529.1	XP_009155529.1	amt family ammonium transporter	amt family ammonium transporter
XP_009155535.1	5970.XP_009155535.1	https://smart.embl.de/smart/DDvec.cgi?smart=536:TRANS(159|181)+COIL(368|397)+	Uncharacterized protein	20307869	20307869	684163319	GI:684163319	GeneID:20307869	GeneID:20307869	H6BVL5	H6BVL5_EXODN	HMPREF1120_03230	HMPREF1120_03230	Hypothetical protein	Uncharacterized protein	XM_009157287.1	XP_009155535	XP_009155535.1	XP_009155535.1	XP_009155535.1	hypothetical protein	hypothetical protein
XP_009155560.1	5970.XP_009155560.1	https://smart.embl.de/smart/DDvec.cgi?smart=492:Pfam_MFS_1(39|411)+TRANS(426|448)+	Retrograde regulation protein 2	20307892	20307892	684163369	GI:684163369	GeneID:20307892	GeneID:20307892	H6BVU6	H6BVU6_EXODN	HMPREF1120_03253	HMPREF1120_03253	Retrograde regulation protein 2	Retrograde regulation protein 2	XM_009157312.1	XP_009155560	XP_009155560.1	XP_009155560.1	XP_009155560.1	retrograde regulation protein 2	retrograde regulation protein 2
XP_009155572.1	5970.XP_009155572.1	https://smart.embl.de/smart/DDvec.cgi?smart=295:Pfam_SnoaL_4(20|165)+	Uncharacterized protein	20307903	20307903	684163393	GI:684163393	GeneID:20307903	GeneID:20307903	H6BVV7	H6BVV7_EXODN	HMPREF1120_03264	HMPREF1120_03264	Hypothetical protein	Uncharacterized protein	XM_009157324.1	XP_009155572	XP_009155572.1	XP_009155572.1	XP_009155572.1	hypothetical protein	hypothetical protein
XP_009155579.1	5970.XP_009155579.1	https://smart.embl.de/smart/DDvec.cgi?smart=609:Pfam_Aa_trans(134|527)+TRANS(559|581)+	Uncharacterized protein	20307910	20307910	684163407	GI:684163407	GeneID:20307910	GeneID:20307910	H6BVW4	H6BVW4_EXODN	HMPREF1120_03271	HMPREF1120_03271	Hypothetical protein	Uncharacterized protein	XM_009157331.1	XP_009155579	XP_009155579.1	XP_009155579.1	XP_009155579.1	hypothetical protein	hypothetical protein
XP_009155599.1	5970.XP_009155599.1	https://smart.embl.de/smart/DDvec.cgi?smart=1488:COIL(751|792)+	Uncharacterized protein	20307929	20307929	684163447	GI:684163447	GeneID:20307929	GeneID:20307929	H6BW39	H6BW39_EXODN	HMPREF1120_03290	HMPREF1120_03290	Hypothetical protein	Uncharacterized protein	XM_009157351.1	XP_009155599	XP_009155599.1	XP_009155599.1	XP_009155599.1	XP_009155600.1	hypothetical protein	hypothetical protein
XP_009155607.1	5970.XP_009155607.1	https://smart.embl.de/smart/DDvec.cgi?smart=197:SIGNAL(1|21)+	Uncharacterized protein	20307935	20307935	684163463	GI:684163463	GeneID:20307935	GeneID:20307935	H6BW46	H6BW46_EXODN	HMPREF1120_03296	HMPREF1120_03296	Hypothetical protein	Uncharacterized protein	XM_009157359.1	XP_009155607	XP_009155607.1	XP_009155607.1	XP_009155607.1	hypothetical protein	hypothetical protein
XP_009155608.1	5970.XP_009155608.1	https://smart.embl.de/smart/DDvec.cgi?smart=182:Pfam_Cupin_2(89|157)+	Uncharacterized protein	20307936	20307936	684163465	GI:684163465	GeneID:20307936	GeneID:20307936	H6BW47	H6BW47_EXODN	HMPREF1120_03297	HMPREF1120_03297	Hypothetical protein	Uncharacterized protein	XM_009157360.1	XP_009155608	XP_009155608.1	XP_009155608.1	XP_009155608.1	hypothetical protein	hypothetical protein
XP_009155610.1	5970.XP_009155610.1	https://smart.embl.de/smart/DDvec.cgi?smart=1528:Pfam_Rad9_Rad53_bind(927|1069)+BRCT(1150|1244)+	DNA repair protein RAD9	20307938	20307938	684163469	DNA repair protein RAD9	DNA repair protein RAD9	DNA repair protein RAD9	GI:684163469	GeneID:20307938	GeneID:20307938	H6BW49	H6BW49_EXODN	HMPREF1120_03299	HMPREF1120_03299	XM_009157362.1	XP_009155610	XP_009155610.1	XP_009155610.1	XP_009155610.1
XP_009155616.1	5970.XP_009155616.1	https://smart.embl.de/smart/DDvec.cgi?smart=1344:Pfam_POT1(998|1144)+	Uncharacterized protein	20307944	20307944	684163481	GI:684163481	GeneID:20307944	GeneID:20307944	H6BW55	H6BW55_EXODN	HMPREF1120_03305	HMPREF1120_03305	Hypothetical protein	Uncharacterized protein	XM_009157368.1	XP_009155616	XP_009155616.1	XP_009155616.1	XP_009155616.1	hypothetical protein	hypothetical protein
XP_009155627.1	5970.XP_009155627.1	https://smart.embl.de/smart/DDvec.cgi?smart=525:TRANS(423|445)+TRANS(460|482)+	Uncharacterized protein	20307955	20307955	684163503	GI:684163503	GeneID:20307955	GeneID:20307955	H6BW66	H6BW66_EXODN	HMPREF1120_03316	HMPREF1120_03316	Hypothetical protein	Uncharacterized protein	XM_009157379.1	XP_009155627	XP_009155627.1	XP_009155627.1	XP_009155627.1	hypothetical protein	hypothetical protein
XP_009155628.1	5970.XP_009155628.1	https://smart.embl.de/smart/DDvec.cgi?smart=849:Pfam_Pkinase(459|788)+	Uncharacterized protein	20307956	20307956	684163505	GI:684163505	GeneID:20307956	GeneID:20307956	H6BW67	H6BW67_EXODN	HMPREF1120_03317	HMPREF1120_03317	Hypothetical protein	Uncharacterized protein	XM_009157380.1	XP_009155628	XP_009155628.1	XP_009155628.1	XP_009155628.1	hypothetical protein	hypothetical protein
XP_009155634.1	5970.XP_009155634.1	https://smart.embl.de/smart/DDvec.cgi?smart=1023:Pfam_2OG-FeII_Oxy_3(133|223)+	Uncharacterized protein	20307962	20307962	684163517	GI:684163517	GeneID:20307962	GeneID:20307962	H6BW73	H6BW73_EXODN	HMPREF1120_03323	HMPREF1120_03323	Hypothetical protein	Uncharacterized protein	XM_009157386.1	XP_009155634	XP_009155634.1	XP_009155634.1	XP_009155634.1	hypothetical protein	hypothetical protein
XP_009155635.1	5970.XP_009155635.1	https://smart.embl.de/smart/DDvec.cgi?smart=1486:Pfam_ABC_trans_N(31|134)+AAA(170|380)+Pfam_ABC2_membrane(485|695)+Pfam_PDR_CDR(703|794)+AAA(864|1056)+Pfam_ABC2_membrane(1163|1381)+TRANS(1454|1476)+	ABC drug exporter AbcA; Belongs to the ABC transporter superfamily. ABCG family. PDR (TC 3.A.1.205) subfamily	20307963	20307963	684163519	ABC drug exporter AbcA	ABC drug exporter AbcA	ABC drug exporter AbcA	GI:684163519	GeneID:20307963	GeneID:20307963	H6BW74	H6BW74_EXODN	HMPREF1120_03324	HMPREF1120_03324	XM_009157387.1	XP_009155635	XP_009155635.1	XP_009155635.1	XP_009155635.1
XP_009155640.1	5970.XP_009155640.1	https://smart.embl.de/smart/DDvec.cgi?smart=852:Pfam_Helicase_C_3(109|232)+DEXDc(337|518)+HELICc(595|673)+	DNA excision repair protein ERCC-3	20307968	20307968	684163529	DNA excision repair protein ERCC-3	DNA excision repair protein ERCC-3	DNA excision repair protein ERCC-3	GI:684163529	GeneID:20307968	GeneID:20307968	H6BW79	H6BW79_EXODN	HMPREF1120_03329	HMPREF1120_03329	XM_009157392.1	XP_009155640	XP_009155640.1	XP_009155640.1	XP_009155640.1
XP_009155664.1	5970.XP_009155664.1	https://smart.embl.de/smart/DDvec.cgi?smart=503:SIGNAL(1|18)+Pfam_His_Phos_2(40|351)+TRANS(443|465)+	Acid phosphatase; Belongs to the histidine acid phosphatase family	20307990	20307990	684163577	Acid phosphatase	Acid phosphatase	GI:684163577	GeneID:20307990	GeneID:20307990	H6BWF7	H6BWF7_EXODN	HMPREF1120_03351	HMPREF1120_03351	XM_009157416.1	XP_009155664	XP_009155664.1	XP_009155664.1	XP_009155664.1	acid phosphatase	acid phosphatase
XP_009155671.1	5970.XP_009155671.1	https://smart.embl.de/smart/DDvec.cgi?smart=611:GAL4(21|64)+Pfam_DUF3425(486|605)+	Uncharacterized protein	20307994	20307994	684163591	GI:684163591	GeneID:20307994	GeneID:20307994	H6BWG4	H6BWG4_EXODN	HMPREF1120_03355	HMPREF1120_03355	Hypothetical protein	Uncharacterized protein	XM_009157423.1	XP_009155671	XP_009155671.1	XP_009155671.1	XP_009155671.1	hypothetical protein	hypothetical protein
XP_009155679.1	5970.XP_009155679.1	https://smart.embl.de/smart/DDvec.cgi?smart=485:TRANS(11|33)+Pfam_DUF1996(47|296)+	WSC domain-containing protein	20308002	20308002	684163607	GI:684163607	GeneID:20308002	GeneID:20308002	H6BWH2	H6BWH2_EXODN	HMPREF1120_03363	HMPREF1120_03363	WSC domain-containing protein	WSC domain-containing protein	WSC domain-containing protein	XM_009157431.1	XP_009155679	XP_009155679.1	XP_009155679.1	XP_009155679.1
XP_009155683.1	5970.XP_009155683.1	https://smart.embl.de/smart/DDvec.cgi?smart=195:COIL(58|93)+	Uncharacterized protein	20308006	20308006	684163615	GI:684163615	GeneID:20308006	GeneID:20308006	H6BWH6	H6BWH6_EXODN	HMPREF1120_03367	HMPREF1120_03367	Hypothetical protein	Uncharacterized protein	XM_009157435.1	XP_009155683	XP_009155683.1	XP_009155683.1	XP_009155683.1	hypothetical protein	hypothetical protein
XP_009155689.1	5970.XP_009155689.1	https://smart.embl.de/smart/DDvec.cgi?smart=706:RING(189|239)+COIL(523|556)+	Uncharacterized protein	20308012	20308012	684163627	GI:684163627	GeneID:20308012	GeneID:20308012	H6BWI2	H6BWI2_EXODN	HMPREF1120_03373	HMPREF1120_03373	Hypothetical protein	Uncharacterized protein	XM_009157441.1	XP_009155689	XP_009155689.1	XP_009155689.1	XP_009155689.1	hypothetical protein	hypothetical protein
XP_009155693.1	5970.XP_009155693.1	https://smart.embl.de/smart/DDvec.cgi?smart=315:Pfam_Methyltransf_25(85|172)+	Uncharacterized protein	20308016	20308016	684163635	GI:684163635	GeneID:20308016	GeneID:20308016	H6BWI6	H6BWI6_EXODN	HMPREF1120_03377	HMPREF1120_03377	Hypothetical protein	Uncharacterized protein	XM_009157445.1	XP_009155693	XP_009155693.1	XP_009155693.1	XP_009155693.1	hypothetical protein	hypothetical protein
XP_009155695.1	5970.XP_009155695.1	https://smart.embl.de/smart/DDvec.cgi?smart=256:Pfam_Ceramidase(17|254)+	Uncharacterized protein	20308018	20308018	684163639	GI:684163639	GeneID:20308018	GeneID:20308018	H6BWI8	H6BWI8_EXODN	HMPREF1120_03379	HMPREF1120_03379	Hypothetical protein	Uncharacterized protein	XM_009157447.1	XP_009155695	XP_009155695.1	XP_009155695.1	XP_009155695.1	hypothetical protein	hypothetical protein
XP_009155698.1	5970.XP_009155698.1	https://smart.embl.de/smart/DDvec.cgi?smart=405:Pfam_UBA_4(8|50)+SEP(206|299)+UBX(322|403)+	Uncharacterized protein	20308021	20308021	684163645	GI:684163645	GeneID:20308021	GeneID:20308021	H6BWJ1	H6BWJ1_EXODN	HMPREF1120_03382	HMPREF1120_03382	Hypothetical protein	Uncharacterized protein	XM_009157450.1	XP_009155698	XP_009155698.1	XP_009155698.1	XP_009155698.1	hypothetical protein	hypothetical protein
XP_009155701.1	5970.XP_009155701.1	https://smart.embl.de/smart/DDvec.cgi?smart=702:Pfam_AMP-binding(111|563)+	acetoacetate-CoA ligase	20308024	20308024	684163651	Acetoacetate-CoA ligase	GI:684163651	GeneID:20308024	GeneID:20308024	H6BWJ4	H6BWJ4_EXODN	HMPREF1120_03385	HMPREF1120_03385	XM_009157453.1	XP_009155701	XP_009155701.1	XP_009155701.1	XP_009155701.1	acetoacetate-CoA ligase	acetoacetate-CoA ligase
XP_009155702.1	5970.XP_009155702.1	http://smart.embl.de/smart/DDt.cgi?smart=128:	Uncharacterized protein	20308025	20308025	684163653	GI:684163653	GeneID:20308025	GeneID:20308025	H6BWJ5	H6BWJ5_EXODN	HMPREF1120_03386	HMPREF1120_03386	Hypothetical protein	Uncharacterized protein	XM_009157454.1	XP_009155702	XP_009155702.1	XP_009155702.1	XP_009155702.1	hypothetical protein	hypothetical protein
XP_009155703.1	5970.XP_009155703.1	http://smart.embl.de/smart/DDt.cgi?smart=438:	Uncharacterized protein	20308026	20308026	684163655	GI:684163655	GeneID:20308026	GeneID:20308026	H6BWJ6	H6BWJ6_EXODN	HMPREF1120_03387	HMPREF1120_03387	Hypothetical protein	Uncharacterized protein	XM_009157455.1	XP_009155703	XP_009155703.1	XP_009155703.1	XP_009155703.1	hypothetical protein	hypothetical protein
XP_009155704.1	5970.XP_009155704.1	https://smart.embl.de/smart/DDvec.cgi?smart=899:GAL4(213|257)+Fungal_trans(493|577)+	Uncharacterized protein	20308027	20308027	684163657	GI:684163657	GeneID:20308027	GeneID:20308027	H6BWJ7	H6BWJ7_EXODN	HMPREF1120_03388	HMPREF1120_03388	Hypothetical protein	Uncharacterized protein	XM_009157456.1	XP_009155704	XP_009155704.1	XP_009155704.1	XP_009155704.1	hypothetical protein	hypothetical protein
XP_009155710.1	5970.XP_009155710.1	https://smart.embl.de/smart/DDvec.cgi?smart=289:TRANS(212|234)+	PTH2 family peptidyl-tRNA hydrolase	20308033	20308033	684163669	GI:684163669	GeneID:20308033	GeneID:20308033	H6BWQ8	H6BWQ8_EXODN	HMPREF1120_03394	HMPREF1120_03394	PTH2 family peptidyl-tRNA hydrolase	PTH2 family peptidyl-tRNA hydrolase	PTH2 family peptidyl-tRNA hydrolase	XM_009157462.1	XP_009155710	XP_009155710.1	XP_009155710.1	XP_009155710.1
XP_009155714.1	5970.XP_009155714.1	https://smart.embl.de/smart/DDvec.cgi?smart=770:COIL(122|150)+Pfam_Sec6(183|769)+	Exocyst complex component 3	20308037	20308037	684163677	Exocyst complex component 3	Exocyst complex component 3	GI:684163677	GeneID:20308037	GeneID:20308037	H6BWR2	H6BWR2_EXODN	HMPREF1120_03398	HMPREF1120_03398	XM_009157466.1	XP_009155714	XP_009155714.1	XP_009155714.1	XP_009155714.1	exocyst complex component 3	exocyst complex component 3
XP_009155726.1	5970.XP_009155726.1	http://smart.embl.de/smart/DDt.cgi?smart=336:	Uncharacterized protein	20308048	20308048	684163701	GI:684163701	GeneID:20308048	GeneID:20308048	H6BWS4	H6BWS4_EXODN	HMPREF1120_03409	HMPREF1120_03409	Hypothetical protein	Uncharacterized protein	XM_009157478.1	XP_009155726	XP_009155726.1	XP_009155726.1	XP_009155726.1	hypothetical protein	hypothetical protein
XP_009155728.1	5970.XP_009155728.1	http://smart.embl.de/smart/DDt.cgi?smart=663:	Uncharacterized protein	20308050	20308050	684163705	GI:684163705	GeneID:20308050	GeneID:20308050	H6BWS6	H6BWS6_EXODN	HMPREF1120_03411	HMPREF1120_03411	Hypothetical protein	Uncharacterized protein	XM_009157480.1	XP_009155728	XP_009155728.1	XP_009155728.1	XP_009155728.1	hypothetical protein	hypothetical protein
XP_009155734.1	5970.XP_009155734.1	https://smart.embl.de/smart/DDvec.cgi?smart=808:RWD(14|166)+RING(204|254)+IBR(294|398)+RING(424|453)+	Uncharacterized protein	20308056	20308056	684163717	GI:684163717	GeneID:20308056	GeneID:20308056	H6BWT2	H6BWT2_EXODN	HMPREF1120_03417	HMPREF1120_03417	Hypothetical protein	Uncharacterized protein	XM_009157486.1	XP_009155734	XP_009155734.1	XP_009155734.1	XP_009155734.1	hypothetical protein	hypothetical protein
XP_009155741.1	5970.XP_009155741.1	https://smart.embl.de/smart/DDvec.cgi?smart=1143:DEXDc(254|447)+HELICc(643|734)+	Fanconi anemia group M protein	20308062	20308062	684163731	Fanconi anemia group M protein	Fanconi anemia group M protein	GI:684163731	GeneID:20308062	GeneID:20308062	H6BWT9	H6BWT9_EXODN	HMPREF1120_03423	HMPREF1120_03423	XM_009157493.1	XP_009155741	XP_009155741.1	XP_009155741.1	XP_009155741.1	fanconi anemia group M protein	fanconi anemia group M protein
XP_009155751.1	5970.XP_009155751.1	https://smart.embl.de/smart/DDvec.cgi?smart=204:TRANS(15|37)+TRANS(58|75)+TRANS(85|107)+TRANS(183|200)+	Uncharacterized protein; Homodimer interface [polypeptide binding]; other site	187627	20308070	20308071	20308071	236056	684163749	684163751	858893	CDD:187627	CDD:236056	GI:684163749	GI:684163751	GeneID:20308070	GeneID:20308071	GeneID:20308071	H6BWU9	H6BWU9_EXODN	HMPREF1120_03432	HMPREF1120_03432	Hypothetical protein	Uncharacterized protein	XM_009157503.1	XP_009155751	XP_009155751.1	XP_009155751.1	XP_009155751.1	hypothetical protein	hypothetical protein	taxon:858893
XP_009155770.1	5970.XP_009155770.1	https://smart.embl.de/smart/DDvec.cgi?smart=651:Pfam_UPF0061(84|617)+	Uncharacterized protein	20308090	20308090	684163789	GI:684163789	GeneID:20308090	GeneID:20308090	H6BX23	H6BX23_EXODN	HMPREF1120_03451	HMPREF1120_03451	Hypothetical protein	Uncharacterized protein	XM_009157522.1	XP_009155770	XP_009155770.1	XP_009155770.1	XP_009155770.1	hypothetical protein	hypothetical protein
XP_009155772.1	5970.XP_009155772.1	https://smart.embl.de/smart/DDvec.cgi?smart=358:Aldolase_II(56|285)+	Uncharacterized protein	20308092	20308092	684163793	GI:684163793	GeneID:20308092	GeneID:20308092	H6BX25	H6BX25_EXODN	HMPREF1120_03453	HMPREF1120_03453	Hypothetical protein	Uncharacterized protein	XM_009157524.1	XP_009155772	XP_009155772.1	XP_009155772.1	XP_009155772.1	hypothetical protein	hypothetical protein
XP_009155773.1	5970.XP_009155773.1	https://smart.embl.de/smart/DDvec.cgi?smart=83:Pfam_Con-6(4|36)+Pfam_Con-6(51|83)+	Uncharacterized protein	20308093	20308093	684163795	GI:684163795	GeneID:20308093	GeneID:20308093	H6BX26	H6BX26_EXODN	HMPREF1120_03454	HMPREF1120_03454	Hypothetical protein	Uncharacterized protein	XM_009157525.1	XP_009155773	XP_009155773.1	XP_009155773.1	XP_009155773.1	hypothetical protein	hypothetical protein
XP_009155786.1	5970.XP_009155786.1	https://smart.embl.de/smart/DDvec.cgi?smart=276:Pfam_adh_short_C2(11|269)+	3-oxoacyl-[acyl-carrier protein] reductase	20308105	20308105	3-oxoacyl-[acyl-carrier protein] reductase	3-oxoacyl-[acyl-carrier protein] reductase	3-oxoacyl-[acyl-carrier protein] reductase	684163821	GI:684163821	GeneID:20308105	GeneID:20308105	H6BX38	H6BX38_EXODN	HMPREF1120_03466	HMPREF1120_03466	XM_009157538.1	XP_009155786	XP_009155786.1	XP_009155786.1	XP_009155786.1
XP_009155790.1	5970.XP_009155790.1	https://smart.embl.de/smart/DDvec.cgi?smart=1470:PH(274|374)+GRAM(775|841)+Pfam_Glyco_transf_28(962|1097)+	Sterol 3beta-glucosyltransferase	20308109	20308109	684163829	GI:684163829	GeneID:20308109	GeneID:20308109	H6BX43	H6BX43_EXODN	HMPREF1120_03470	HMPREF1120_03470	Sterol 3beta-glucosyltransferase	Sterol 3beta-glucosyltransferase	XM_009157542.1	XP_009155790	XP_009155790.1	XP_009155790.1	XP_009155790.1	sterol 3beta-glucosyltransferase	sterol 3beta-glucosyltransferase
XP_009155794.1	5970.XP_009155794.1	http://smart.embl.de/smart/DDt.cgi?smart=169:	Uncharacterized protein	20308113	20308113	684163837	GI:684163837	GeneID:20308113	GeneID:20308113	H6BX47	H6BX47_EXODN	HMPREF1120_03474	HMPREF1120_03474	Hypothetical protein	Uncharacterized protein	XM_009157546.1	XP_009155794	XP_009155794.1	XP_009155794.1	XP_009155794.1	hypothetical protein	hypothetical protein
XP_009155804.1	5970.XP_009155804.1	https://smart.embl.de/smart/DDvec.cgi?smart=681:ZnF_C2H2(129|151)+ZnF_C2H2(157|179)+	Cys2His2 zinc finger developmental/cell cycle regulator	20308123	20308123	684163857	GI:684163857	GeneID:20308123	GeneID:20308123	H6BX57	H6BX57_EXODN	HMPREF1120_03484	HMPREF1120_03484	XM_009157556.1	XP_009155804	XP_009155804.1	XP_009155804.1	XP_009155804.1
XP_009155819.1	5970.XP_009155819.1	https://smart.embl.de/smart/DDvec.cgi?smart=565:Pfam_DUF5102(265|565)+	Uncharacterized protein	20308138	20308138	684163887	GI:684163887	GeneID:20308138	GeneID:20308138	H6BXC7	H6BXC7_EXODN	HMPREF1120_03499	HMPREF1120_03499	Hypothetical protein	Uncharacterized protein	XM_009157571.1	XP_009155819	XP_009155819.1	XP_009155819.1	XP_009155819.1	hypothetical protein	hypothetical protein
XP_009155823.1	5970.XP_009155823.1	https://smart.embl.de/smart/DDvec.cgi?smart=273:Pfam_CSN8_PSD8_EIF3K(100|252)+	26S proteasome regulatory subunit N12	20308140	20308141	20308141	26S proteasome regulatory subunit N12	26S proteasome regulatory subunit N12	26S proteasome regulatory subunit N12	684163893	684163895	858893	GI:684163893	GI:684163895	GeneID:20308140	GeneID:20308141	GeneID:20308141	H6BXC9	H6BXC9_EXODN	HMPREF1120_03502	HMPREF1120_03502	XM_009157575.1	XP_009155823	XP_009155823.1	XP_009155823.1	XP_009155823.1	taxon:858893
XP_009155825.1	5970.XP_009155825.1	https://smart.embl.de/smart/DDvec.cgi?smart=486:Pfam_DUF1917(41|422)+	Uncharacterized protein	20308143	20308143	684163899	GI:684163899	GeneID:20308143	GeneID:20308143	H6BXD3	H6BXD3_EXODN	HMPREF1120_03504	HMPREF1120_03504	Hypothetical protein	Uncharacterized protein	XM_009157577.1	XP_009155825	XP_009155825.1	XP_009155825.1	XP_009155825.1	hypothetical protein	hypothetical protein
XP_009155833.1	5970.XP_009155833.1	https://smart.embl.de/smart/DDvec.cgi?smart=476:BTB(179|285)+	Uncharacterized protein	20308150	20308150	684163915	GI:684163915	GeneID:20308150	GeneID:20308150	H6BXE1	H6BXE1_EXODN	HMPREF1120_03511	HMPREF1120_03511	Hypothetical protein	Uncharacterized protein	XM_009157585.1	XP_009155833	XP_009155833.1	XP_009155833.1	XP_009155833.1	hypothetical protein	hypothetical protein
XP_009155847.1	5970.XP_009155847.1	https://smart.embl.de/smart/DDvec.cgi?smart=927:TRANS(285|307)+TRANS(320|342)+Pfam_Glyco_trans_2_3(535|758)+TRANS(771|793)+TRANS(813|835)+TRANS(866|888)+TRANS(898|920)+	Uncharacterized protein	20308164	20308164	684163943	GI:684163943	GeneID:20308164	GeneID:20308164	H6BXF5	H6BXF5_EXODN	HMPREF1120_03525	HMPREF1120_03525	Hypothetical protein	Uncharacterized protein	XM_009157599.1	XP_009155847	XP_009155847.1	XP_009155847.1	XP_009155847.1	hypothetical protein	hypothetical protein
XP_009155865.1	5970.XP_009155865.1	https://smart.embl.de/smart/DDvec.cgi?smart=546:Pfam_Carbpep_Y_N(1|102)+Pfam_Peptidase_S10(132|543)+	Carboxypeptidase C; Belongs to the peptidase S10 family	20308181	20308181	684163979	Carboxypeptidase	Carboxypeptidase C	GI:684163979	GeneID:20308181	GeneID:20308181	H6BXH3	H6BXH3_EXODN	HMPREF1120_03542	HMPREF1120_03542	XM_009157617.1	XP_009155865	XP_009155865.1	XP_009155865.1	XP_009155865.1	carboxypeptidase C	carboxypeptidase C
XP_009155867.1	5970.XP_009155867.1	https://smart.embl.de/smart/DDvec.cgi?smart=358:Pfam_ADH_N(34|145)+Pfam_ADH_zinc_N(187|318)+	Alcohol dehydrogenase 3	20308183	20308183	684163983	Alcohol dehydrogenase 3	Alcohol dehydrogenase 3	GI:684163983	GeneID:20308183	GeneID:20308183	H6BXH5	H6BXH5_EXODN	HMPREF1120_03544	HMPREF1120_03544	XM_009157619.1	XP_009155867	XP_009155867.1	XP_009155867.1	XP_009155867.1	alcohol dehydrogenase 3	alcohol dehydrogenase 3
XP_009155868.1	5970.XP_009155868.1	https://smart.embl.de/smart/DDvec.cgi?smart=491:Pfam_Aldedh(23|487)+	Vanillin dehydrogenase; Belongs to the aldehyde dehydrogenase family	20308184	20308184	684163985	GI:684163985	GeneID:20308184	GeneID:20308184	H6BXH6	H6BXH6_EXODN	HMPREF1120_03545	HMPREF1120_03545	Vanillin dehydrogenase	Vanillin dehydrogenase	XM_009157620.1	XP_009155868	XP_009155868.1	XP_009155868.1	XP_009155868.1	vanillin dehydrogenase	vanillin dehydrogenase
XP_009155870.1	5970.XP_009155870.1	https://smart.embl.de/smart/DDvec.cgi?smart=590:Pfam_HAD_2(121|297)+	Uncharacterized protein	20308186	20308186	684163989	GI:684163989	GeneID:20308186	GeneID:20308186	H6BXH8	H6BXH8_EXODN	HMPREF1120_03547	HMPREF1120_03547	Hypothetical protein	Uncharacterized protein	XM_009157622.1	XP_009155870	XP_009155870.1	XP_009155870.1	XP_009155870.1	hypothetical protein	hypothetical protein
XP_009155884.1	5970.XP_009155884.1	https://smart.embl.de/smart/DDvec.cgi?smart=1095:COIL(1043|1068)+	Uncharacterized protein	20308199	20308199	684164017	GI:684164017	GeneID:20308199	GeneID:20308199	H6BTJ6	H6BTJ6_EXODN	HMPREF1120_03560	HMPREF1120_03560	Hypothetical protein	Uncharacterized protein	XM_009157636.1	XP_009155884	XP_009155884.1	XP_009155884.1	XP_009155884.1	hypothetical protein	hypothetical protein
XP_009155891.1	5970.XP_009155891.1	https://smart.embl.de/smart/DDvec.cgi?smart=965:CHROMO(26|86)+Pfam_MRG(769|955)+	Mortality factor 4-like protein 1	20308205	20308205	684164031	GI:684164031	GeneID:20308205	GeneID:20308205	H6BTK3	H6BTK3_EXODN	HMPREF1120_03566	HMPREF1120_03566	Mortality factor 4-like protein 1	Mortality factor 4-like protein 1	XM_009157643.1	XP_009155891	XP_009155891.1	XP_009155891.1	XP_009155891.1	mortality factor 4-like protein 1	mortality factor 4-like protein 1
XP_009155907.1	5970.XP_009155907.1	https://smart.embl.de/smart/DDvec.cgi?smart=593:Pfam_NAD_binding_8(20|91)+TRANS(140|159)+TRANS(467|489)+TRANS(504|521)+	Uncharacterized protein	20308219	20308219	684164063	GI:684164063	GeneID:20308219	GeneID:20308219	H6BTL9	H6BTL9_EXODN	HMPREF1120_03580	HMPREF1120_03580	Hypothetical protein	Uncharacterized protein	XM_009157659.1	XP_009155907	XP_009155907.1	XP_009155907.1	XP_009155907.1	hypothetical protein	hypothetical protein
XP_009155914.1	5970.XP_009155914.1	https://smart.embl.de/smart/DDvec.cgi?smart=277:Pfam_Acetyltransf_7(167|245)+	Uncharacterized protein	20308226	20308226	684164077	GI:684164077	GeneID:20308226	GeneID:20308226	H6BTM6	H6BTM6_EXODN	HMPREF1120_03587	HMPREF1120_03587	Hypothetical protein	Uncharacterized protein	XM_009157666.1	XP_009155914	XP_009155914.1	XP_009155914.1	XP_009155914.1	hypothetical protein	hypothetical protein
XP_009155915.1	5970.XP_009155915.1	https://smart.embl.de/smart/DDvec.cgi?smart=371:Pfam_EI24(18|292)+	Uncharacterized protein	20308227	20308227	684164079	GI:684164079	GeneID:20308227	GeneID:20308227	H6BTM7	H6BTM7_EXODN	HMPREF1120_03588	HMPREF1120_03588	Hypothetical protein	Uncharacterized protein	XM_009157667.1	XP_009155915	XP_009155915.1	XP_009155915.1	XP_009155915.1	hypothetical protein	hypothetical protein
XP_009155917.1	5970.XP_009155917.1	https://smart.embl.de/smart/DDvec.cgi?smart=1155:Pfam_TIMELESS(38|306)+COIL(554|580)+Pfam_TIMELESS_C(649|1150)+	Replication fork protection complex subunit Swi1/Tof1	20308229	20308229	684164083	GI:684164083	GeneID:20308229	GeneID:20308229	H6BTM9	H6BTM9_EXODN	HMPREF1120_03590	HMPREF1120_03590	XM_009157669.1	XP_009155917	XP_009155917.1	XP_009155917.1	XP_009155917.1
XP_009155921.1	5970.XP_009155921.1	https://smart.embl.de/smart/DDvec.cgi?smart=451:GAL4(36|80)+	Uncharacterized protein	20308233	20308233	684164091	GI:684164091	GeneID:20308233	GeneID:20308233	H6BTN3	H6BTN3_EXODN	HMPREF1120_03594	HMPREF1120_03594	Hypothetical protein	Uncharacterized protein	XM_009157673.1	XP_009155921	XP_009155921.1	XP_009155921.1	XP_009155921.1	hypothetical protein	hypothetical protein
XP_009155922.1	5970.XP_009155922.1	https://smart.embl.de/smart/DDvec.cgi?smart=508:Pfam_Tfb2(10|406)+	RNA polymerase II transcription factor B subunit 2; Component of the core-TFIIH basal transcription factor involved in nucleotide excision repair (NER) of DNA	20308234	20308234	684164093	GI:684164093	GeneID:20308234	GeneID:20308234	H6BTN4	H6BTN4_EXODN	HMPREF1120_03595	HMPREF1120_03595	Transcription initiation factor TFIIH subunit H4	XM_009157674.1	XP_009155922	XP_009155922.1	XP_009155922.1	XP_009155922.1	transcription initiation factor TFIIH subunit H4	transcription initiation factor TFIIH subunit H4
XP_009155929.1	5970.XP_009155929.1	https://smart.embl.de/smart/DDvec.cgi?smart=486:Pfam_IFRD(50|380)+	Uncharacterized protein	20308241	20308241	684164107	GI:684164107	GeneID:20308241	GeneID:20308241	H6BTP1	H6BTP1_EXODN	HMPREF1120_03602	HMPREF1120_03602	Hypothetical protein	Uncharacterized protein	XM_009157681.1	XP_009155929	XP_009155929.1	XP_009155929.1	XP_009155929.1	hypothetical protein	hypothetical protein
XP_009155930.1	5970.XP_009155930.1	https://smart.embl.de/smart/DDvec.cgi?smart=818:ZnF_ZZ(211|257)+ZnF_ZZ(302|346)+ZnF_ZZ(373|418)+ZnF_ZZ(434|485)+Pfam_N_BRCA1_IG(579|692)+	Uncharacterized protein	20308242	20308242	684164109	GI:684164109	GeneID:20308242	GeneID:20308242	H6BTP2	H6BTP2_EXODN	HMPREF1120_03603	HMPREF1120_03603	Hypothetical protein	Uncharacterized protein	XM_009157682.1	XP_009155930	XP_009155930.1	XP_009155930.1	XP_009155930.1	hypothetical protein	hypothetical protein
XP_009155936.1	5970.XP_009155936.1	http://smart.embl.de/smart/DDt.cgi?smart=425:	Uncharacterized protein	20308248	20308248	684164121	GI:684164121	GeneID:20308248	GeneID:20308248	H6BTP8	H6BTP8_EXODN	HMPREF1120_03609	HMPREF1120_03609	Hypothetical protein	Uncharacterized protein	XM_009157688.1	XP_009155936	XP_009155936.1	XP_009155936.1	XP_009155936.1	hypothetical protein	hypothetical protein
XP_009155943.1	5970.XP_009155943.1	https://smart.embl.de/smart/DDvec.cgi?smart=343:Pfam_DUF2370(108|326)+	Uncharacterized protein	20308255	20308255	684164135	GI:684164135	GeneID:20308255	GeneID:20308255	H6BTQ5	H6BTQ5_EXODN	HMPREF1120_03616	HMPREF1120_03616	Hypothetical protein	Uncharacterized protein	XM_009157695.1	XP_009155943	XP_009155943.1	XP_009155943.1	XP_009155943.1	hypothetical protein	hypothetical protein
XP_009155949.1	5970.XP_009155949.1	https://smart.embl.de/smart/DDvec.cgi?smart=851:BRCT(33|119)+BRCT(132|210)+BRCT(264|342)+BRCT(361|437)+BRCT(627|701)+BRCT(736|841)+	Uncharacterized protein	20308261	20308261	684164147	GI:684164147	GeneID:20308261	GeneID:20308261	H6BTR1	H6BTR1_EXODN	HMPREF1120_03622	HMPREF1120_03622	Hypothetical protein	Uncharacterized protein	XM_009157701.1	XP_009155949	XP_009155949.1	XP_009155949.1	XP_009155949.1	hypothetical protein	hypothetical protein
XP_009155950.1	5970.XP_009155950.1	https://smart.embl.de/smart/DDvec.cgi?smart=419:Pfam_Hydrolase_4(70|217)+	Uncharacterized protein	20308262	20308262	684164149	GI:684164149	GeneID:20308262	GeneID:20308262	H6BTR2	H6BTR2_EXODN	HMPREF1120_03623	HMPREF1120_03623	Hypothetical protein	Uncharacterized protein	XM_009157702.1	XP_009155950	XP_009155950.1	XP_009155950.1	XP_009155950.1	hypothetical protein	hypothetical protein
XP_009155962.1	5970.XP_009155962.1	https://smart.embl.de/smart/DDvec.cgi?smart=657:ZnF_C2H2(305|329)+	ADA HAT complex component 1	20308274	20308274	684164173	ADA HAT complex component 1	ADA HAT complex component 1	ADA HAT complex component 1	GI:684164173	GeneID:20308274	GeneID:20308274	H6BTS4	H6BTS4_EXODN	HMPREF1120_03635	HMPREF1120_03635	XM_009157714.1	XP_009155962	XP_009155962.1	XP_009155962.1	XP_009155962.1
XP_009155963.1	5970.XP_009155963.1	https://smart.embl.de/smart/DDvec.cgi?smart=891:TRANS(193|215)+	Uncharacterized protein	20308275	20308275	684164175	GI:684164175	GeneID:20308275	GeneID:20308275	H6BTS5	H6BTS5_EXODN	HMPREF1120_03636	HMPREF1120_03636	Hypothetical protein	Uncharacterized protein	XM_009157715.1	XP_009155963	XP_009155963.1	XP_009155963.1	XP_009155963.1	hypothetical protein	hypothetical protein
XP_009155972.1	5970.XP_009155972.1	https://smart.embl.de/smart/DDvec.cgi?smart=137:SIGNAL(1|33)+	Uncharacterized protein	20308284	20308284	684164193	GI:684164193	GeneID:20308284	GeneID:20308284	H6BTT4	H6BTT4_EXODN	HMPREF1120_03645	HMPREF1120_03645	Hypothetical protein	Uncharacterized protein	XM_009157724.1	XP_009155972	XP_009155972.1	XP_009155972.1	XP_009155972.1	hypothetical protein	hypothetical protein
XP_009155973.1	5970.XP_009155973.1	http://smart.embl.de/smart/DDt.cgi?smart=100:	Uncharacterized protein	20308285	20308285	684164195	GI:684164195	GeneID:20308285	GeneID:20308285	H6BTT6	H6BTT6_EXODN	HMPREF1120_03646	HMPREF1120_03646	Hypothetical protein	Uncharacterized protein	XM_009157725.1	XP_009155973	XP_009155973.1	XP_009155973.1	XP_009155973.1	XP_009155974.1	hypothetical protein	hypothetical protein
XP_009155976.1	5970.XP_009155976.1	https://smart.embl.de/smart/DDvec.cgi?smart=689:Pfam_CRC_subunit(150|283)+	Uncharacterized protein	20308287	20308287	684164201	GI:684164201	GeneID:20308287	GeneID:20308287	H6BTT8	H6BTT8_EXODN	HMPREF1120_03648	HMPREF1120_03648	Hypothetical protein	Uncharacterized protein	XM_009157728.1	XP_009155976	XP_009155976.1	XP_009155976.1	XP_009155976.1	hypothetical protein	hypothetical protein
XP_009155977.1	5970.XP_009155977.1	https://smart.embl.de/smart/DDvec.cgi?smart=433:Pfam_Pyr_redox(13|82)+	Salicylate hydroxylase	20308288	20308288	684164203	GI:684164203	GeneID:20308288	GeneID:20308288	H6BTT9	H6BTT9_EXODN	HMPREF1120_03649	HMPREF1120_03649	Salicylate hydroxylase	Salicylate hydroxylase	XM_009157729.1	XP_009155977	XP_009155977.1	XP_009155977.1	XP_009155977.1	salicylate hydroxylase	salicylate hydroxylase
XP_009155979.1	5970.XP_009155979.1	https://smart.embl.de/smart/DDvec.cgi?smart=904:ZnF_C2H2(4|26)+ZnF_C2H2(32|54)+Pfam_Fungal_trans(392|660)+TRANS(762|784)+	Uncharacterized protein	20308290	20308290	684164207	GI:684164207	GeneID:20308290	GeneID:20308290	H6BTU1	H6BTU1_EXODN	HMPREF1120_03651	HMPREF1120_03651	Hypothetical protein	Uncharacterized protein	XM_009157731.1	XP_009155979	XP_009155979.1	XP_009155979.1	XP_009155979.1	hypothetical protein	hypothetical protein
XP_009155989.1	5970.XP_009155989.1	https://smart.embl.de/smart/DDvec.cgi?smart=491:Pfam_FMO-like(7|220)+	Monooxygenase	20308300	20308300	684164227	GI:684164227	GeneID:20308300	GeneID:20308300	H6BTV1	H6BTV1_EXODN	HMPREF1120_03661	HMPREF1120_03661	Monooxygenase	Monooxygenase	XM_009157741.1	XP_009155989	XP_009155989.1	XP_009155989.1	XP_009155989.1	monooxygenase	monooxygenase
XP_009156009.1	5970.XP_009156009.1	http://smart.embl.de/smart/DDt.cgi?smart=283:	Uncharacterized protein	20308319	20308319	684164267	GI:684164267	GeneID:20308319	GeneID:20308319	H6BTX1	H6BTX1_EXODN	HMPREF1120_03680	HMPREF1120_03680	Hypothetical protein	Uncharacterized protein	XM_009157761.1	XP_009156009	XP_009156009.1	XP_009156009.1	XP_009156009.1	hypothetical protein	hypothetical protein
XP_009156010.1	5970.XP_009156010.1	https://smart.embl.de/smart/DDvec.cgi?smart=359:SIGNAL(1|19)+Pfam_S1-P1_nuclease(20|317)+	Uncharacterized protein	20308320	20308320	684164269	GI:684164269	GeneID:20308320	GeneID:20308320	H6BTX2	H6BTX2_EXODN	HMPREF1120_03681	HMPREF1120_03681	Hypothetical protein	Uncharacterized protein	XM_009157762.1	XP_009156010	XP_009156010.1	XP_009156010.1	XP_009156010.1	hypothetical protein	hypothetical protein
XP_009156029.1	5970.XP_009156029.1	https://smart.embl.de/smart/DDvec.cgi?smart=320:DnaJ(77|137)+	Uncharacterized protein	20308339	20308339	684164307	GI:684164307	GeneID:20308339	GeneID:20308339	H6BTZ1	H6BTZ1_EXODN	HMPREF1120_03700	HMPREF1120_03700	Hypothetical protein	Uncharacterized protein	XM_009157781.1	XP_009156029	XP_009156029.1	XP_009156029.1	XP_009156029.1	hypothetical protein	hypothetical protein
XP_009156033.1	5970.XP_009156033.1	https://smart.embl.de/smart/DDvec.cgi?smart=1292:Pfam_DUF676(20|217)+Pfam_NB-ARC(379|609)+	Uncharacterized protein	20308343	20308343	684164315	GI:684164315	GeneID:20308343	GeneID:20308343	H6BTZ5	H6BTZ5_EXODN	HMPREF1120_03704	HMPREF1120_03704	Hypothetical protein	Uncharacterized protein	XM_009157785.1	XP_009156033	XP_009156033.1	XP_009156033.1	XP_009156033.1	hypothetical protein	hypothetical protein
XP_009156040.1	5970.XP_009156040.1	https://smart.embl.de/smart/DDvec.cgi?smart=496:Pfam_CDT1_C(357|468)+	Uncharacterized protein	20308350	20308350	684164329	GI:684164329	GeneID:20308350	GeneID:20308350	H6BU02	H6BU02_EXODN	HMPREF1120_03711	HMPREF1120_03711	Hypothetical protein	Uncharacterized protein	XM_009157792.1	XP_009156040	XP_009156040.1	XP_009156040.1	XP_009156040.1	hypothetical protein	hypothetical protein
XP_009156053.1	5970.XP_009156053.1	https://smart.embl.de/smart/DDvec.cgi?smart=819:Pfam_Kelch_5(448|499)+TRANS(672|694)+	Uncharacterized protein	20308363	20308363	684164355	GI:684164355	GeneID:20308363	GeneID:20308363	H6BU15	H6BU15_EXODN	HMPREF1120_03724	HMPREF1120_03724	Hypothetical protein	Uncharacterized protein	XM_009157805.1	XP_009156053	XP_009156053.1	XP_009156053.1	XP_009156053.1	hypothetical protein	hypothetical protein
XP_009156056.1	5970.XP_009156056.1	https://smart.embl.de/smart/DDvec.cgi?smart=749:Fungal_trans(188|262)+	Uncharacterized protein	20308366	20308366	684164361	GI:684164361	GeneID:20308366	GeneID:20308366	H6BU18	H6BU18_EXODN	HMPREF1120_03727	HMPREF1120_03727	Hypothetical protein	Uncharacterized protein	XM_009157808.1	XP_009156056	XP_009156056.1	XP_009156056.1	XP_009156056.1	hypothetical protein	hypothetical protein
XP_009156062.1	5970.XP_009156062.1	https://smart.embl.de/smart/DDvec.cgi?smart=498:Pfam_MFS_1(41|413)+TRANS(428|450)+	Retrograde regulation protein 2	20308371	20308371	684164373	GI:684164373	GeneID:20308371	GeneID:20308371	H6BU24	H6BU24_EXODN	HMPREF1120_03732	HMPREF1120_03732	Retrograde regulation protein 2	Retrograde regulation protein 2	XM_009157814.1	XP_009156062	XP_009156062.1	XP_009156062.1	XP_009156062.1	retrograde regulation protein 2	retrograde regulation protein 2
XP_009156063.1	5970.XP_009156063.1	https://smart.embl.de/smart/DDvec.cgi?smart=395:Pfam_DIOX_N(34|156)+Pfam_2OG-FeII_Oxy(180|302)+	Gibberellin 2-oxidase	20308372	20308372	684164375	GI:684164375	GeneID:20308372	GeneID:20308372	Gibberellin 2-oxidase	Gibberellin 2-oxidase	H6BU25	H6BU25_EXODN	HMPREF1120_03733	HMPREF1120_03733	XM_009157815.1	XP_009156063	XP_009156063.1	XP_009156063.1	XP_009156063.1	gibberellin 2-oxidase	gibberellin 2-oxidase
XP_009156066.1	5970.XP_009156066.1	https://smart.embl.de/smart/DDvec.cgi?smart=229:Pfam_GST_N(2|82)+Pfam_GST_C_3(125|211)+	Elongation factor EF-1 gamma subunit; Active site; Belongs to the GST superfamily	20308373	20308374	20308374	263925	684164379	684164381	858893	CDD:263925	Elongation factor EF-1 gamma subunit	Elongation factor EF-1 gamma subunit	GI:684164379	GI:684164381	GeneID:20308373	GeneID:20308374	GeneID:20308374	H6BU28	H6BU28_EXODN	HMPREF1120_03735	HMPREF1120_03735	XM_009157818.1	XP_009156066	XP_009156066.1	XP_009156066.1	XP_009156066.1	elongation factor EF-1 gamma subunit	elongation factor EF-1 gamma subunit	taxon:858893
XP_009156075.1	5970.XP_009156075.1	https://smart.embl.de/smart/DDvec.cgi?smart=410:Pfam_Methyltransf_2(175|393)+	Catechol O-methyltransferase	20308383	20308383	684164399	Catechol O-methyltransferase	Catechol O-methyltransferase	GI:684164399	GeneID:20308383	GeneID:20308383	H6BU37	H6BU37_EXODN	HMPREF1120_03744	HMPREF1120_03744	XM_009157827.1	XP_009156075	XP_009156075.1	XP_009156075.1	XP_009156075.1	catechol O-methyltransferase	catechol O-methyltransferase
XP_009156076.1	5970.XP_009156076.1	http://smart.embl.de/smart/DDt.cgi?smart=216:	Uncharacterized protein	20308384	20308384	684164401	GI:684164401	GeneID:20308384	GeneID:20308384	H6BU38	H6BU38_EXODN	HMPREF1120_03745	HMPREF1120_03745	Hypothetical protein	Uncharacterized protein	XM_009157828.1	XP_009156076	XP_009156076.1	XP_009156076.1	XP_009156076.1	hypothetical protein	hypothetical protein
XP_009156089.1	5970.XP_009156089.1	https://smart.embl.de/smart/DDvec.cgi?smart=256:SIGNAL(1|19)+Pfam_Sod_Cu(39|197)+	Superoxide dismutase	20308397	20308397	684164427	GI:684164427	GeneID:20308397	GeneID:20308397	H6BU51	H6BU51_EXODN	HMPREF1120_03758	HMPREF1120_03758	Superoxide dismutase	Superoxide dismutase	XM_009157841.1	XP_009156089	XP_009156089.1	XP_009156089.1	XP_009156089.1	superoxide dismutase	superoxide dismutase
XP_009156094.1	5970.XP_009156094.1	https://smart.embl.de/smart/DDvec.cgi?smart=880:Pfam_Tcf25(269|585)+	Uncharacterized protein	20308402	20308402	684164437	GI:684164437	GeneID:20308402	GeneID:20308402	H6BU56	H6BU56_EXODN	HMPREF1120_03763	HMPREF1120_03763	Hypothetical protein	Uncharacterized protein	XM_009157846.1	XP_009156094	XP_009156094.1	XP_009156094.1	XP_009156094.1	hypothetical protein	hypothetical protein
XP_009156096.1	5970.XP_009156096.1	https://smart.embl.de/smart/DDvec.cgi?smart=274:SAP(48|82)+	Uncharacterized protein	20308404	20308404	684164441	GI:684164441	GeneID:20308404	GeneID:20308404	H6BU58	H6BU58_EXODN	HMPREF1120_03765	HMPREF1120_03765	Hypothetical protein	Uncharacterized protein	XM_009157848.1	XP_009156096	XP_009156096.1	XP_009156096.1	XP_009156096.1	hypothetical protein	hypothetical protein
XP_009156103.1	5970.XP_009156103.1	https://smart.embl.de/smart/DDvec.cgi?smart=412:Pfam_Fe-ADH(26|402)+	Fe-containing alcohol dehydrogenase	20308411	20308411	684164455	Fe-containing alcohol dehydrogenase	Fe-containing alcohol dehydrogenase	Fe-containing alcohol dehydrogenase	GI:684164455	GeneID:20308411	GeneID:20308411	H6BU65	H6BU65_EXODN	HMPREF1120_03772	HMPREF1120_03772	XM_009157855.1	XP_009156103	XP_009156103.1	XP_009156103.1	XP_009156103.1
XP_009156108.1	5970.XP_009156108.1	https://smart.embl.de/smart/DDvec.cgi?smart=694:ZnF_C2H2(469|491)+ZnF_C2H2(497|519)+COIL(568|594)+	Metallothionein expression activator	20308416	20308416	684164465	GI:684164465	GeneID:20308416	GeneID:20308416	H6BU70	H6BU70_EXODN	HMPREF1120_03777	HMPREF1120_03777	Metallothionein expression activator	Metallothionein expression activator	XM_009157860.1	XP_009156108	XP_009156108.1	XP_009156108.1	XP_009156108.1	metallothionein expression activator	metallothionein expression activator
XP_009156114.1	5970.XP_009156114.1	http://smart.embl.de/smart/DDt.cgi?smart=449:	Uncharacterized protein	20308422	20308422	684164477	GI:684164477	GeneID:20308422	GeneID:20308422	H6BU76	H6BU76_EXODN	HMPREF1120_03783	HMPREF1120_03783	Hypothetical protein	Uncharacterized protein	XM_009157866.1	XP_009156114	XP_009156114.1	XP_009156114.1	XP_009156114.1	hypothetical protein	hypothetical protein
XP_009156119.1	5970.XP_009156119.1	https://smart.embl.de/smart/DDvec.cgi?smart=693:GAL4(5|48)+Fungal_trans(323|397)+	Uncharacterized protein	20308427	20308427	684164487	GI:684164487	GeneID:20308427	GeneID:20308427	H6BU81	H6BU81_EXODN	HMPREF1120_03788	HMPREF1120_03788	Hypothetical protein	Uncharacterized protein	XM_009157871.1	XP_009156119	XP_009156119.1	XP_009156119.1	XP_009156119.1	hypothetical protein	hypothetical protein
XP_009156125.1	5970.XP_009156125.1	https://smart.embl.de/smart/DDvec.cgi?smart=427:PHB(81|239)+Pfam_Band_7_C(304|368)+	Uncharacterized protein	20308432	20308432	684164499	GI:684164499	GeneID:20308432	GeneID:20308432	H6BU87	H6BU87_EXODN	HMPREF1120_03793	HMPREF1120_03793	Hypothetical protein	Uncharacterized protein	XM_009157877.1	XP_009156125	XP_009156125.1	XP_009156125.1	XP_009156125.1	hypothetical protein	hypothetical protein
XP_009156126.1	5970.XP_009156126.1	https://smart.embl.de/smart/DDvec.cgi?smart=230:Pfam_Oxidored_q6(104|214)+	NADH-ubiquinone oxidoreductase 19.3 kDa subunit, mitochondrial; Belongs to the complex I 20 kDa subunit family	20308433	20308433	684164501	GI:684164501	GeneID:20308433	GeneID:20308433	H6BU88	H6BU88_EXODN	HMPREF1120_03794	HMPREF1120_03794	XM_009157878.1	XP_009156126	XP_009156126.1	XP_009156126.1	XP_009156126.1
XP_009156134.1	5970.XP_009156134.1	https://smart.embl.de/smart/DDvec.cgi?smart=745:Pfam_HET(211|357)+	Uncharacterized protein	20308439	20308439	684164517	GI:684164517	GeneID:20308439	GeneID:20308439	H6BU96	H6BU96_EXODN	HMPREF1120_03800	HMPREF1120_03800	Hypothetical protein	Uncharacterized protein	XM_009157886.1	XP_009156134	XP_009156134.1	XP_009156134.1	XP_009156134.1	hypothetical protein	hypothetical protein
XP_009156138.1	5970.XP_009156138.1	https://smart.embl.de/smart/DDvec.cgi?smart=434:Pfam_Oxysterol_BP(28|331)+	Uncharacterized protein; Belongs to the OSBP family	20308442	20308442	684164525	GI:684164525	GeneID:20308442	GeneID:20308442	H6BUA0	H6BUA0_EXODN	HMPREF1120_03803	HMPREF1120_03803	Hypothetical protein	Uncharacterized protein	XM_009157890.1	XP_009156138	XP_009156138.1	XP_009156138.1	XP_009156138.1	hypothetical protein	hypothetical protein
XP_009156165.1	5970.XP_009156165.1	https://smart.embl.de/smart/DDvec.cgi?smart=1433:AAA(132|333)+Pfam_ABC2_membrane(446|656)+Pfam_PDR_CDR(669|758)+AAA(829|1029)+Pfam_ABC2_membrane(1114|1324)+TRANS(1399|1421)+	ABC multidrug transporter; Belongs to the ABC transporter superfamily. ABCG family. PDR (TC 3.A.1.205) subfamily	20308468	20308468	684164579	ABC multidrug transporter	ABC multidrug transporter	ABC multidrug transporter	GI:684164579	GeneID:20308468	GeneID:20308468	H6BUG2	H6BUG2_EXODN	HMPREF1120_03829	HMPREF1120_03829	XM_009157917.1	XP_009156165	XP_009156165.1	XP_009156165.1	XP_009156165.1
XP_009156166.1	5970.XP_009156166.1	https://smart.embl.de/smart/DDvec.cgi?smart=650:GAL4(21|65)+Fungal_trans(329|411)+TRANS(565|587)+	Uncharacterized protein	20308469	20308469	684164581	GI:684164581	GeneID:20308469	GeneID:20308469	H6BUG3	H6BUG3_EXODN	HMPREF1120_03830	HMPREF1120_03830	Hypothetical protein	Uncharacterized protein	XM_009157918.1	XP_009156166	XP_009156166.1	XP_009156166.1	XP_009156166.1	hypothetical protein	hypothetical protein
XP_009156170.1	5970.XP_009156170.1	https://smart.embl.de/smart/DDvec.cgi?smart=443:Pfam_IU_nuc_hydro(5|412)+	DNA glycosylase	20308473	20308473	684164589	DNA glycosylase	DNA glycosylase	DNA glycosylase	GI:684164589	GeneID:20308473	GeneID:20308473	H6BUG7	H6BUG7_EXODN	HMPREF1120_03834	HMPREF1120_03834	XM_009157922.1	XP_009156170	XP_009156170.1	XP_009156170.1	XP_009156170.1
XP_009156183.1	5970.XP_009156183.1	https://smart.embl.de/smart/DDvec.cgi?smart=918:Pfam_ATP-cone(1|89)+Pfam_Ribonuc_red_lgN(141|213)+Pfam_Ribonuc_red_lgC(216|739)+	Ribonucleoside-diphosphate reductase; Provides the precursors necessary for DNA synthesis. Catalyzes the biosynthesis of deoxyribonucleotides from the corresponding ribonucleotides	20308486	20308486	684164615	GI:684164615	GeneID:20308486	GeneID:20308486	H6BUI0	H6BUI0_EXODN	HMPREF1120_03847	HMPREF1120_03847	Ribonucleoside-diphosphate reductase	Ribonucleoside-diphosphate reductase large chain	XM_009157935.1	XP_009156183	XP_009156183.1	XP_009156183.1	XP_009156183.1	ribonucleoside-diphosphate reductase large chain	ribonucleoside-diphosphate reductase large chain
XP_009156208.1	5970.XP_009156208.1	https://smart.embl.de/smart/DDvec.cgi?smart=750:GAL4(16|60)+Pfam_Fungal_trans(174|481)+	Uncharacterized protein	20308510	20308510	684164665	GI:684164665	GeneID:20308510	GeneID:20308510	H6BUR0	H6BUR0_EXODN	HMPREF1120_03871	HMPREF1120_03871	Hypothetical protein	Uncharacterized protein	XM_009157960.1	XP_009156208	XP_009156208.1	XP_009156208.1	XP_009156208.1	hypothetical protein	hypothetical protein
XP_009156209.1	5970.XP_009156209.1	https://smart.embl.de/smart/DDvec.cgi?smart=321:Pfam_KR(17|123)+	Uncharacterized protein	20308511	20308511	684164667	GI:684164667	GeneID:20308511	GeneID:20308511	H6BUR1	H6BUR1_EXODN	HMPREF1120_03872	HMPREF1120_03872	Hypothetical protein	Uncharacterized protein	XM_009157961.1	XP_009156209	XP_009156209.1	XP_009156209.1	XP_009156209.1	hypothetical protein	hypothetical protein
XP_009156211.1	5970.XP_009156211.1	https://smart.embl.de/smart/DDvec.cgi?smart=598:Pfam_AMP-binding(60|496)+Pfam_AMP-binding_C(504|581)+	fatty-acyl-CoA synthase	20308513	20308513	684164671	Fatty-acyl-CoA synthase	GI:684164671	GeneID:20308513	GeneID:20308513	H6BUR3	H6BUR3_EXODN	HMPREF1120_03874	HMPREF1120_03874	XM_009157963.1	XP_009156211	XP_009156211.1	XP_009156211.1	XP_009156211.1	fatty-acyl-CoA synthase	fatty-acyl-CoA synthase
XP_009156227.1	5970.XP_009156227.1	https://smart.embl.de/smart/DDvec.cgi?smart=399:SIGNAL(1|23)+Pfam_Arginase(91|385)+	Agmatinase; Belongs to the arginase family	20308529	20308529	684164703	Agmatinase	Agmatinase	GI:684164703	GeneID:20308529	GeneID:20308529	H6BUS9	H6BUS9_EXODN	HMPREF1120_03890	HMPREF1120_03890	XM_009157979.1	XP_009156227	XP_009156227.1	XP_009156227.1	XP_009156227.1	agmatinase	agmatinase
XP_009156236.1	5970.XP_009156236.1	https://smart.embl.de/smart/DDvec.cgi?smart=156:SIGNAL(1|18)+	Uncharacterized protein	20308538	20308538	684164721	GI:684164721	GeneID:20308538	GeneID:20308538	H6BUT8	H6BUT8_EXODN	HMPREF1120_03899	HMPREF1120_03899	Hypothetical protein	Uncharacterized protein	XM_009157988.1	XP_009156236	XP_009156236.1	XP_009156236.1	XP_009156236.1	hypothetical protein	hypothetical protein
XP_009156240.1	5970.XP_009156240.1	https://smart.embl.de/smart/DDvec.cgi?smart=747:Pfam_MFS_1(72|484)+TRANS(505|527)+	MFS transporter, DHA2 family, multidrug resistance protein	20308542	20308542	684164729	GI:684164729	GeneID:20308542	GeneID:20308542	H6BUU2	H6BUU2_EXODN	HMPREF1120_03903	HMPREF1120_03903	XM_009157992.1	XP_009156240	XP_009156240.1	XP_009156240.1	XP_009156240.1
XP_009156249.1	5970.XP_009156249.1	https://smart.embl.de/smart/DDvec.cgi?smart=1584:COIL(106|133)+ANK(148|178)+ANK(209|237)+ANK(305|334)+ANK(398|427)+ANK(789|818)+ANK(819|851)+ANK(913|942)+ANK(976|1011)+ANK(1012|1041)+ANK(1119|1152)+ANK(1157|1186)+ANK(1190|1219)+ANK(1221|1246)+ANK(1252|1290)+ANK(1336|1372)+COIL(1392|1443)+	NAD-dependent histone deacetylase SIR2	20308551	20308551	684164747	GI:684164747	GeneID:20308551	GeneID:20308551	H6BV05	H6BV05_EXODN	HMPREF1120_03912	HMPREF1120_03912	NAD-dependent histone deacetylase SIR2	NAD-dependent histone deacetylase SIR2	NAD-dependent histone deacetylase SIR2	XM_009158001.1	XP_009156249	XP_009156249.1	XP_009156249.1	XP_009156249.1
XP_009156269.1	5970.XP_009156269.1	https://smart.embl.de/smart/DDvec.cgi?smart=264:Pfam_EI24(9|226)+	Uncharacterized protein	20308569	20308569	684164787	GI:684164787	GeneID:20308569	GeneID:20308569	H6BV25	H6BV25_EXODN	HMPREF1120_03930	HMPREF1120_03930	Hypothetical protein	Uncharacterized protein	XM_009158021.1	XP_009156269	XP_009156269.1	XP_009156269.1	XP_009156269.1	hypothetical protein	hypothetical protein
XP_009156275.1	5970.XP_009156275.1	https://smart.embl.de/smart/DDvec.cgi?smart=544:S_TKc(67|334)+	Mitogen-activated protein kinase kinase	20308575	20308575	684164799	GI:684164799	GeneID:20308575	GeneID:20308575	H6BV31	H6BV31_EXODN	HMPREF1120_03936	HMPREF1120_03936	Mitogen-activated protein kinase kinase	Mitogen-activated protein kinase kinase	XM_009158027.1	XP_009156275	XP_009156275.1	XP_009156275.1	XP_009156275.1	mitogen-activated protein kinase kinase	mitogen-activated protein kinase kinase
XP_009156277.1	5970.XP_009156277.1	https://smart.embl.de/smart/DDvec.cgi?smart=627:SIGNAL(1|21)+Pfam_FAD_binding_4(155|305)+Pfam_BBE(568|611)+	FAD/FMN-containing protein; Belongs to the oxygen-dependent FAD-linked oxidoreductase family	20308577	20308577	684164803	FAD/FMN-containing protein	FAD/FMN-containing protein	FAD/FMN-containing protein	GI:684164803	GeneID:20308577	GeneID:20308577	H6BV33	H6BV33_EXODN	HMPREF1120_03938	HMPREF1120_03938	XM_009158029.1	XP_009156277	XP_009156277.1	XP_009156277.1	XP_009156277.1
XP_009156281.1	5970.XP_009156281.1	https://smart.embl.de/smart/DDvec.cgi?smart=305:SIGNAL(1|20)+	Uncharacterized protein	20308581	20308581	684164811	GI:684164811	GeneID:20308581	GeneID:20308581	H6BV37	H6BV37_EXODN	HMPREF1120_03942	HMPREF1120_03942	Hypothetical protein	Uncharacterized protein	XM_009158033.1	XP_009156281	XP_009156281.1	XP_009156281.1	XP_009156281.1	hypothetical protein	hypothetical protein
XP_009156282.1	5970.XP_009156282.1	https://smart.embl.de/smart/DDvec.cgi?smart=1009:TRANS(13|35)+TRANS(50|72)+TRANS(93|115)+TRANS(130|152)+TRANS(173|195)+TRANS(210|232)+Pfam_MFS_1(414|770)+TRANS(784|806)+	MFS transporter, FHS family, L-fucose permease	20308582	20308582	684164813	GI:684164813	GeneID:20308582	GeneID:20308582	H6BV38	H6BV38_EXODN	HMPREF1120_03943	HMPREF1120_03943	MFS transporter, FHS family, L-fucose permease	MFS transporter, FHS family, L-fucose permease	MFS transporter, FHS family, L-fucose permease	XM_009158034.1	XP_009156282	XP_009156282.1	XP_009156282.1	XP_009156282.1
XP_009156293.1	5970.XP_009156293.1	https://smart.embl.de/smart/DDvec.cgi?smart=1125:Pfam_Ufd2P_core(385|1010)+Ubox(1029|1092)+	Ubiquitin conjugation factor E4 B	20308591	20308591	684164835	GI:684164835	GeneID:20308591	GeneID:20308591	H6BV49	H6BV49_EXODN	HMPREF1120_03952	HMPREF1120_03952	Ubiquitin conjugation factor E4 B	Ubiquitin conjugation factor E4 B	XM_009158045.1	XP_009156293	XP_009156293.1	XP_009156293.1	XP_009156293.1	ubiquitin conjugation factor E4 B	ubiquitin conjugation factor E4 B
XP_009156311.1	5970.XP_009156311.1	https://smart.embl.de/smart/DDvec.cgi?smart=742:GAL4(41|84)+COIL(86|121)+Fungal_trans(350|425)+	Casein kinase II subunit beta; Plays a complex role in regulating the basal catalytic activity of the alpha subunit	20308606	20308606	684164871	Casein kinase II subunit beta	GI:684164871	GeneID:20308606	GeneID:20308606	H6BVC0	H6BVC0_EXODN	HMPREF1120_03967	HMPREF1120_03967	Hypothetical protein	XM_009158063.1	XP_009156311	XP_009156311.1	XP_009156311.1	XP_009156311.1	hypothetical protein	hypothetical protein
XP_009156315.1	5970.XP_009156315.1	https://smart.embl.de/smart/DDvec.cgi?smart=623:Pfam_NAD_binding_8(26|94)+	Cyclohexanone monooxygenase	20308609	20308609	684164879	Cyclohexanone monooxygenase	Cyclohexanone monooxygenase	GI:684164879	GeneID:20308609	GeneID:20308609	H6BVC4	H6BVC4_EXODN	HMPREF1120_03970	HMPREF1120_03970	XM_009158067.1	XP_009156315	XP_009156315.1	XP_009156315.1	XP_009156315.1	cyclohexanone monooxygenase	cyclohexanone monooxygenase
XP_009156317.1	5970.XP_009156317.1	https://smart.embl.de/smart/DDvec.cgi?smart=587:Pfam_Transferase(212|579)+	Uncharacterized protein	20308611	20308611	684164883	GI:684164883	GeneID:20308611	GeneID:20308611	H6BVC6	H6BVC6_EXODN	HMPREF1120_03972	HMPREF1120_03972	Hypothetical protein	Uncharacterized protein	XM_009158069.1	XP_009156317	XP_009156317.1	XP_009156317.1	XP_009156317.1	hypothetical protein	hypothetical protein
XP_009156318.1	5970.XP_009156318.1	https://smart.embl.de/smart/DDvec.cgi?smart=349:HhH1(61|80)+AAA(122|311)+	DNA repair protein RAD51 homolog; Required both for recombination and for the repair of DNA damage caused by X-rays	20308612	20308612	684164885	DNA repair protein RAD51 homolog	DNA repair protein rhp51	DNA repair protein rhp51	GI:684164885	GeneID:20308612	GeneID:20308612	H6BVC7	H6BVC7_EXODN	HMPREF1120_03973	HMPREF1120_03973	XM_009158070.1	XP_009156318	XP_009156318.1	XP_009156318.1	XP_009156318.1
XP_009156320.1	5970.XP_009156320.1	https://smart.embl.de/smart/DDvec.cgi?smart=546:TRANS(13|35)+Pfam_p450(46|534)+	Cytochrome P450 monooxygenase	20308614	20308614	684164889	Cytochrome P450 monooxygenase	Cytochrome P450 monooxygenase	GI:684164889	GeneID:20308614	GeneID:20308614	H6BVC9	H6BVC9_EXODN	HMPREF1120_03975	HMPREF1120_03975	XM_009158072.1	XP_009156320	XP_009156320.1	XP_009156320.1	XP_009156320.1	cytochrome P450 monooxygenase	cytochrome P450 monooxygenase
XP_009156330.1	5970.XP_009156330.1	https://smart.embl.de/smart/DDvec.cgi?smart=193:Pfam_Bys1(17|175)+	Uncharacterized protein	20308623	20308623	684164909	GI:684164909	GeneID:20308623	GeneID:20308623	H6BVD9	H6BVD9_EXODN	HMPREF1120_03984	HMPREF1120_03984	Hypothetical protein	Uncharacterized protein	XM_009158082.1	XP_009156330	XP_009156330.1	XP_009156330.1	XP_009156330.1	hypothetical protein	hypothetical protein
XP_009156331.1	5970.XP_009156331.1	https://smart.embl.de/smart/DDvec.cgi?smart=443:Pfam_DAO(8|375)+	Oxygen oxidoreductase	20308624	20308624	684164911	GI:684164911	GeneID:20308624	GeneID:20308624	H6BVE0	H6BVE0_EXODN	HMPREF1120_03985	HMPREF1120_03985	Oxygen oxidoreductase	Oxygen oxidoreductase	XM_009158083.1	XP_009156331	XP_009156331.1	XP_009156331.1	XP_009156331.1	oxygen oxidoreductase	oxygen oxidoreductase
XP_009156345.1	5970.XP_009156345.1	https://smart.embl.de/smart/DDvec.cgi?smart=641:Pfam_Fe_hyd_lg_C(123|465)+	Ferredoxin hydrogenase; Belongs to the NARF family	20308637	20308637	684164939	Ferredoxin hydrogenase	Ferredoxin hydrogenase	GI:684164939	GeneID:20308637	GeneID:20308637	H6BVF4	H6BVF4_EXODN	HMPREF1120_03998	HMPREF1120_03998	XM_009158097.1	XP_009156345	XP_009156345.1	XP_009156345.1	XP_009156345.1	ferredoxin hydrogenase	ferredoxin hydrogenase
XP_009156362.1	5970.XP_009156362.1	http://smart.embl.de/smart/DDt.cgi?smart=140:	Uncharacterized protein	20308653	20308653	684164973	GI:684164973	GeneID:20308653	GeneID:20308653	H6BVM9	H6BVM9_EXODN	HMPREF1120_04014	HMPREF1120_04014	Hypothetical protein	Uncharacterized protein	XM_009158114.1	XP_009156362	XP_009156362.1	XP_009156362.1	XP_009156362.1	XP_009156363.1	XP_009156364.1	XP_009156365.1	XP_009156366.1	hypothetical protein	hypothetical protein
XP_009156398.1	5970.XP_009156398.1	https://smart.embl.de/smart/DDvec.cgi?smart=296:TRANS(57|79)+TRANS(125|147)+TRANS(167|189)+TRANS(236|258)+	Uncharacterized protein	20308685	20308685	684165045	GI:684165045	GeneID:20308685	GeneID:20308685	H6BVR1	H6BVR1_EXODN	HMPREF1120_04046	HMPREF1120_04046	Hypothetical protein	Uncharacterized protein	XM_009158150.1	XP_009156398	XP_009156398.1	XP_009156398.1	XP_009156398.1	hypothetical protein	hypothetical protein
XP_009156404.1	5970.XP_009156404.1	https://smart.embl.de/smart/DDvec.cgi?smart=860:Pfam_XFP_N(56|428)+Pfam_XFP(437|609)+Pfam_XFP_C(620|825)+	Uncharacterized protein	20308691	20308691	684165057	GI:684165057	GeneID:20308691	GeneID:20308691	H6BVR7	H6BVR7_EXODN	HMPREF1120_04052	HMPREF1120_04052	Hypothetical protein	Uncharacterized protein	XM_009158156.1	XP_009156404	XP_009156404.1	XP_009156404.1	XP_009156404.1	hypothetical protein	hypothetical protein
XP_009156409.1	5970.XP_009156409.1	https://smart.embl.de/smart/DDvec.cgi?smart=373:RGS(64|204)+	Uncharacterized protein	20308696	20308696	684165067	GI:684165067	GeneID:20308696	GeneID:20308696	H6BVS2	H6BVS2_EXODN	HMPREF1120_04057	HMPREF1120_04057	Hypothetical protein	Uncharacterized protein	XM_009158161.1	XP_009156409	XP_009156409.1	XP_009156409.1	XP_009156409.1	hypothetical protein	hypothetical protein
XP_009156420.1	5970.XP_009156420.1	http://smart.embl.de/smart/DDt.cgi?smart=456:	Uncharacterized protein	20308707	20308707	684165089	GI:684165089	GeneID:20308707	GeneID:20308707	H6BVY8	H6BVY8_EXODN	HMPREF1120_04068	HMPREF1120_04068	Hypothetical protein	Uncharacterized protein	XM_009158172.1	XP_009156420	XP_009156420.1	XP_009156420.1	XP_009156420.1	hypothetical protein	hypothetical protein
XP_009156421.1	5970.XP_009156421.1	http://smart.embl.de/smart/DDt.cgi?smart=181:	Uncharacterized protein	20308708	20308708	684165091	GI:684165091	GeneID:20308708	GeneID:20308708	H6BVY9	H6BVY9_EXODN	HMPREF1120_04069	HMPREF1120_04069	Hypothetical protein	Uncharacterized protein	XM_009158173.1	XP_009156421	XP_009156421.1	XP_009156421.1	XP_009156421.1	hypothetical protein	hypothetical protein
XP_009156429.1	5970.XP_009156429.1	https://smart.embl.de/smart/DDvec.cgi?smart=178:TRANS(10|32)+TRANS(45|67)+TRANS(119|141)+	Uncharacterized protein	20308716	20308716	684165107	GI:684165107	GeneID:20308716	GeneID:20308716	H6BVZ7	H6BVZ7_EXODN	HMPREF1120_04077	HMPREF1120_04077	Hypothetical protein	Uncharacterized protein	XM_009158181.1	XP_009156429	XP_009156429.1	XP_009156429.1	XP_009156429.1	hypothetical protein	hypothetical protein
XP_009156437.1	5970.XP_009156437.1	http://smart.embl.de/smart/DDt.cgi?smart=140:	Uncharacterized protein	20308724	20308724	684165123	GI:684165123	GeneID:20308724	GeneID:20308724	H6BW05	H6BW05_EXODN	HMPREF1120_04085	HMPREF1120_04085	Hypothetical protein	Uncharacterized protein	XM_009158189.1	XP_009156437	XP_009156437.1	XP_009156437.1	XP_009156437.1	hypothetical protein	hypothetical protein
XP_009156445.1	5970.XP_009156445.1	https://smart.embl.de/smart/DDvec.cgi?smart=1190:Pfam_Dna2(27|230)+Pfam_Cas_Cas4(221|343)+Pfam_AAA_30(595|827)+	DNA replication ATP-dependent helicase Dna2; Catalytic site [active]	20308730	20308731	20308731	223980	240645	684165137	684165139	858893	CDD:223980	CDD:240645	DNA replication ATP-dependent helicase Dna2	DNA replication ATP-dependent helicase Dna2	DNA replication ATP-dependent helicase Dna2	GI:684165137	GI:684165139	GeneID:20308730	GeneID:20308731	GeneID:20308731	H6BW13	H6BW13_EXODN	HMPREF1120_04092	HMPREF1120_04092	XM_009158197.1	XP_009156445	XP_009156445.1	XP_009156445.1	XP_009156445.1	taxon:858893
XP_009156446.1	5970.XP_009156446.1	http://smart.embl.de/smart/DDt.cgi?smart=512:	DNA replication ATP-dependent helicase Dna2	20308732	20308732	684165141	DNA replication ATP-dependent helicase Dna2	DNA replication ATP-dependent helicase Dna2	DNA replication ATP-dependent helicase Dna2	GI:684165141	GeneID:20308732	GeneID:20308732	H6BW14	H6BW14_EXODN	HMPREF1120_04093	HMPREF1120_04093	XM_009158198.1	XP_009156446	XP_009156446.1	XP_009156446.1	XP_009156446.1
XP_009156455.1	5970.XP_009156455.1	https://smart.embl.de/smart/DDvec.cgi?smart=760:SIGNAL(1|26)+Pfam_NPR3(130|559)+	Uncharacterized protein	20308739	20308739	684165159	GI:684165159	GeneID:20308739	GeneID:20308739	H6BW23	H6BW23_EXODN	HMPREF1120_04100	HMPREF1120_04100	Hypothetical protein	Uncharacterized protein	XM_009158207.1	XP_009156455	XP_009156455.1	XP_009156455.1	XP_009156455.1	hypothetical protein	hypothetical protein
XP_009156459.1	5970.XP_009156459.1	https://smart.embl.de/smart/DDvec.cgi?smart=751:Pfam_zf-CHY(319|392)+RING(448|489)+Pfam_zinc_ribbon_6(494|552)+	Ring finger and CHY zinc finger domain-containing protein 1	20308743	20308743	684165167	GI:684165167	GeneID:20308743	GeneID:20308743	H6BW27	H6BW27_EXODN	HMPREF1120_04104	HMPREF1120_04104	XM_009158211.1	XP_009156459	XP_009156459.1	XP_009156459.1	XP_009156459.1
XP_009156475.1	5970.XP_009156475.1	http://smart.embl.de/smart/DDt.cgi?smart=174:	Uncharacterized protein	20308759	20308759	684165199	GI:684165199	GeneID:20308759	GeneID:20308759	H6BW98	H6BW98_EXODN	HMPREF1120_04120	HMPREF1120_04120	Hypothetical protein	Uncharacterized protein	XM_009158227.1	XP_009156475	XP_009156475.1	XP_009156475.1	XP_009156475.1	hypothetical protein	hypothetical protein
XP_009156495.1	5970.XP_009156495.1	https://smart.embl.de/smart/DDvec.cgi?smart=429:SIGNAL(1|17)+Pfam_Phosphoesterase(76|307)+	Acid phosphatase	20308779	20308779	684165239	Acid phosphatase	Acid phosphatase	GI:684165239	GeneID:20308779	GeneID:20308779	H6BWB8	H6BWB8_EXODN	HMPREF1120_04140	HMPREF1120_04140	XM_009158247.1	XP_009156495	XP_009156495.1	XP_009156495.1	XP_009156495.1	acid phosphatase	acid phosphatase
XP_009156499.1	5970.XP_009156499.1	https://smart.embl.de/smart/DDvec.cgi?smart=635:Pfam_Fungal_trans(165|336)+	Uncharacterized protein	20308783	20308783	684165247	GI:684165247	GeneID:20308783	GeneID:20308783	H6BWC3	H6BWC3_EXODN	HMPREF1120_04144	HMPREF1120_04144	Hypothetical protein	Uncharacterized protein	XM_009158252.1	XP_009156499	XP_009156499.1	XP_009156499.1	XP_009156499.1	XP_009156500.1	hypothetical protein	hypothetical protein
XP_009156501.1	5970.XP_009156501.1	https://smart.embl.de/smart/DDvec.cgi?smart=294:Pfam_adh_short_C2(55|292)+	3-oxoacyl-[acyl-carrier protein] reductase; Fungal transcription factor regulatory middle homology region; Region: fungal_TF_MHR; cd12148	20308783	20308784	20308784	213391	3-oxoacyl-[acyl-carrier protein] reductase	3-oxoacyl-[acyl-carrier protein] reductase	3-oxoacyl-[acyl-carrier protein] reductase	684165249	684165251	858893	CDD:213391	GI:684165249	GI:684165251	GeneID:20308783	GeneID:20308784	GeneID:20308784	H6BWC4	H6BWC4_EXODN	HMPREF1120_04145	HMPREF1120_04145	XM_009158253.1	XP_009156501	XP_009156501.1	XP_009156501.1	XP_009156501.1	taxon:858893
XP_009156523.1	5970.XP_009156523.1	https://smart.embl.de/smart/DDvec.cgi?smart=215:Pfam_Got1(91|203)+	Protein transport protein SFT2; Nonessential protein required for the fusion of transport vesicles derived from the endocytic pathway with the Golgi complex	20308805	20308805	684165295	GI:684165295	GeneID:20308805	GeneID:20308805	H6BWK1	H6BWK1_EXODN	HMPREF1120_04166	HMPREF1120_04166	Hypothetical protein	Protein transport protein SFT2	XM_009158275.1	XP_009156523	XP_009156523.1	XP_009156523.1	XP_009156523.1	hypothetical protein	hypothetical protein
XP_009156534.1	5970.XP_009156534.1	https://smart.embl.de/smart/DDvec.cgi?smart=335:SIGNAL(1|26)+TRANS(192|214)+	Uncharacterized protein	20308814	20308815	20308815	684165315	684165317	858893	GI:684165315	GI:684165317	GeneID:20308814	GeneID:20308815	GeneID:20308815	H6BWL2	H6BWL2_EXODN	HMPREF1120_04176	HMPREF1120_04176	Hypothetical protein	Uncharacterized protein	XM_009158286.1	XP_009156534	XP_009156534.1	XP_009156534.1	XP_009156534.1	hypothetical protein	hypothetical protein	taxon:858893
XP_009156536.1	5970.XP_009156536.1	http://smart.embl.de/smart/DDt.cgi?smart=604:	Uncharacterized protein	20308817	20308817	684165321	GI:684165321	GeneID:20308817	GeneID:20308817	H6BWL4	H6BWL4_EXODN	HMPREF1120_04178	HMPREF1120_04178	Hypothetical protein	Uncharacterized protein	XM_009158288.1	XP_009156536	XP_009156536.1	XP_009156536.1	XP_009156536.1	hypothetical protein	hypothetical protein
XP_009156538.1	5970.XP_009156538.1	https://smart.embl.de/smart/DDvec.cgi?smart=543:Pfam_Peptidase_C65(88|330)+	Ubiquitin thioesterase OTUB1	20308819	20308819	684165325	GI:684165325	GeneID:20308819	GeneID:20308819	H6BWL7	H6BWL7_EXODN	HMPREF1120_04180	HMPREF1120_04180	Ubiquitin thioesterase OTUB1	Ubiquitin thioesterase OTUB1	Ubiquitin thioesterase OTUB1, variant 1	XM_009158291.1	XP_009156538	XP_009156538.1	XP_009156538.1	XP_009156538.1	XP_009156539.1	ubiquitin thioesterase OTUB1	ubiquitin thioesterase OTUB1
XP_009156541.1	5970.XP_009156541.1	http://smart.embl.de/smart/DDt.cgi?smart=190:	Uncharacterized protein; Peptidase C65 Otubain; Region: Peptidase_C65; pfam10275	20308819	20308820	20308820	255873	684165327	684165329	684165331	858893	CDD:255873	GI:684165327	GI:684165329	GI:684165331	GeneID:20308819	GeneID:20308820	GeneID:20308820	H6BWM0	H6BWM0_EXODN	HMPREF1120_04181	HMPREF1120_04181	Hypothetical protein	Uncharacterized protein	XM_009158293.1	XP_009156541	XP_009156541.1	XP_009156541.1	XP_009156541.1	XP_009156542.1	hypothetical protein	hypothetical protein	taxon:858893
XP_009156556.1	5970.XP_009156556.1	https://smart.embl.de/smart/DDvec.cgi?smart=199:Pfam_Cid2(16|181)+	Uncharacterized protein	20308834	20308834	684165361	GI:684165361	GeneID:20308834	GeneID:20308834	H6BWN4	H6BWN4_EXODN	HMPREF1120_04195	HMPREF1120_04195	Hypothetical protein	Uncharacterized protein	XM_009158308.1	XP_009156556	XP_009156556.1	XP_009156556.1	XP_009156556.1	hypothetical protein	hypothetical protein
[truncated: 789 more rows]

## Sheet: Deuteron String Nodes
#node1	node2	node1_string_internal_id	node2_string_internal_id	node1_external_id	node2_external_id	neighborhood_on_chromosome	gene_fusion	phylogenetic_cooccurrence	homology	coexpression	experimentally_determined_interaction	database_annotated	automated_textmining	combined_score
[truncated: 621 more rows]

[truncated: 3 more sheets: Deuteron String Annotations, Proton String Nodes, Proton String Annotations]
